# Supplementary material for: Gene Expression Patterns Underlying the Reinstatement of Plasticity in the Adult Visual System
Source: Hindawi journal article supplement (doi:10.1155/2013/605079), 2013-01-01
Supplement: f1 [file 605079.f1.pdf]

Table S1

| ID            | logFC    | AveExpr  | P.Value  | GenbankAccession | GeneSymbol           |
|---------------|----------|----------|----------|------------------|----------------------|
| A_44_P505500  | 1.607556 | 11.90701 | 0.00122  | CK358354         |                      |
| A_43_P12141   | 1.561647 | 11.19161 | 0.001065 | NM_021869        | Stx7                 |
| A_44_P992854  | 1.324382 | 11.73082 | 0.002197 | NM_057132        | Rhoa                 |
| A_44_P196717  | 1.318426 | 10.03627 | 0.004003 | XM_344970        | Stk32c_predicted     |
| A_44_P113842  | 1.173214 | 8.328451 | 0.000128 | NM_022210        | Max                  |
| A_44_P403482  | 1.15254  | 8.621625 | 0.000569 | XM_213493        | RGD1311493_predicted |
| A_44_P248111  | 1.143281 | 9.320377 | 1.87E-05 | NM_001047107     | Igsf4c_predicted     |
| A_43_P16511   | 1.072354 | 9.35087  | 0.009672 | NM_001044300     | MGC112715            |
| A_42_P522171  | 1.030953 | 9.111699 | 0.001285 | XM_001081512     | RGD1307966_predicted |
| A_44_P223252  | 1.015676 | 13.88146 | 0.009124 | NM_031595        | Psmc3                |
| A_44_P239105  | 1.014573 | 8.624869 | 0.003369 | XM_233341        | Zfyve9_predicted     |
| A_44_P563128  | 1.013565 | 7.972642 | 0.00074  | XR_007778        |                      |
| A_44_P864185  | 0.99365  | 9.886928 | 0.004432 | AW142955         |                      |
| A_44_P255954  | 0.985852 | 11.34905 | 0.008416 | XM_573223        | RGD1566063_predicted |
| A_44_P548507  | 0.976934 | 14.00466 | 0.003327 | NM_032083        | Chn1                 |
| A_42_P713975  | 0.96633  | 14.00655 | 0.002899 | BC082799         | LOC499779            |
| A_43_P13247   | 0.945033 | 9.21568  | 0.001365 | XM_001070141     | Psd                  |
| A_44_P187789  | 0.919478 | 8.124942 | 0.001183 | XM_001066818     |                      |
| A_43_P16512   | 0.917668 | 12.84756 | 0.007548 | XM_218824        | RGD1311021_predicted |
| A_44_P769703  | 0.915946 | 8.731323 | 0.009651 | NM_178096        | Nrep                 |
| A_44_P210461  | 0.909428 | 13.77556 | 0.005967 | NM_017025        | Ldha                 |
| A_44_P176606  | 0.891879 | 7.720083 | 0.005843 | NM_001007235     | Itpr1                |
| A_44_P480605  | 0.877686 | 13.69188 | 0.008763 | XM_001066230     | LOC291543            |
| A_44_P1029397 | 0.874681 | 9.78541  | 0.006524 | NM_198134        | Bst2                 |
| A_44_P463858  | 0.858747 | 7.846463 | 0.000999 | NM_133303        | Bhlhb3               |
| A_44_P189326  | 0.845271 | 12.61675 | 0.003442 | NM_017319        | Pdia3                |
| A_43_P10162   | 0.837812 | 9.295357 | 0.0075   | XM_224841        | Odz3_predicted       |
| A_43_P11622   | 0.797153 | 14.22093 | 0.002926 | NM_012925        | Cd59                 |
| A_44_P552865  | 0.794559 | 12.17696 | 0.008261 | XM_221896        | LOC304280            |
| A_44_P508264  | 0.752347 | 7.640307 | 0.002071 | NM_031762        | Cdkn1b               |
| A_44_P424570  | 0.739812 | 7.775522 | 0.002451 | XM_235521        | Poldip3_predicted    |
| A_43_P12779   | 0.734704 | 13.88252 | 0.006576 | NM_053346        | Nrn1                 |
| A_44_P379976  | 0.719224 | 8.728674 | 0.009711 | NM_001024782     | Lrrc8                |
| A_44_P797926  | 0.71717  | 11.582   | 0.009305 | BG673275         |                      |
| A_44_P506374  | 0.709429 | 8.661933 | 0.004513 | XM_001073596     | Nyw1                 |
| A_44_P356658  | 0.709393 | 8.23732  | 0.009249 | XM_219716        | Pdzd4_predicted      |
| A_44_P108421  | 0.689004 | 9.564137 | 0.00606  | XM_224350        | Fndc3a_predicted     |
| A_43_P16811   | 0.685518 | 9.346495 | 0.008035 | NM_001014073     | RGD1305486           |
| A_44_P473322  | 0.680296 | 7.868224 | 0.005619 | XM_224778        |                      |
| A_44_P417077  | 0.679432 | 8.061647 | 0.001949 | XM_573664        | RGD1566234_predicted |
| A_44_P403410  | 0.65013  | 11.05502 | 0.004235 | NM_001079895     | Rbm9_predicted       |
| A_44_P714315  | 0.649504 | 12.25655 | 0.006677 | CO404950         |                      |
| A_44_P501483  | 0.646159 | 14.38167 | 0.006042 | XR_006667        | LOC310385            |
| A_44_P156966  | 0.642122 | 9.596286 | 0.007913 | XM_228708        | RGD1563226_predicted |

|               |           |          |          |              |                      |
|---------------|-----------|----------|----------|--------------|----------------------|
| A_44_P350794  | 0.5956    | 8.367077 | 0.009356 | AA894317     |                      |
| A_43_P10735   | 0.590686  | 11.8257  | 0.009669 | BF555100     | RGD1566317_predicted |
| A_43_P17622   | 0.586863  | 9.765676 | 0.005446 | XM_345870    | Lass5_predicted      |
| A_42_P704370  | 0.57628   | 13.13036 | 0.008636 | NM_023972    | Arl6ip5              |
| A_44_P448307  | 0.576147  | 14.16514 | 0.004325 | XM_217432    | Arpc2_predicted      |
| A_44_P473472  | 0.569886  | 10.61491 | 0.008531 | BC091233     | RGD1307434_predicted |
| A_43_P21003   | 0.560543  | 10.93669 | 0.006849 | NM_001033892 | RGD1306841           |
| A_44_P738831  | 0.55264   | 8.290444 | 0.004326 | BE105152     |                      |
| A_44_P189813  | 0.551359  | 9.934035 | 0.00539  | XM_214295    | Glt25d1_predicted    |
| A_44_P161220  | 0.542591  | 14.16572 | 0.008859 | NM_080482    | Dbccr1               |
| A_43_P19892   | 0.536862  | 10.33035 | 0.006277 | NM_001014255 | Aph1a                |
| A_44_P108680  | 0.53537   | 8.102587 | 0.006747 | NM_057116    | Ppp2r2c              |
| A_44_P229618  | 0.527464  | 8.367113 | 0.008818 | XM_228065    | Tmem1_predicted      |
| A_44_P255236  | 0.525992  | 9.239359 | 0.009952 | NM_019212    | Acta1                |
| A_44_P455065  | 0.518588  | 14.18702 | 0.006125 | XM_001077680 | RGD1564600_predicted |
| A_44_P208275  | 0.511361  | 8.057972 | 0.001406 | NM_031795    | Ugcg                 |
| A_43_P15848   | 0.510606  | 9.342219 | 0.007543 | M81783       | Kcnf1                |
| A_44_P180294  | 0.507879  | 8.206421 | 0.006738 | XM_344235    |                      |
| A_44_P180676  | 0.507554  | 7.614493 | 0.004982 | XM_341141    |                      |
| A_44_P274573  | 0.507395  | 9.295892 | 0.007497 | XM_232283    | Plxnd1_predicted     |
| A_44_P222865  | 0.490304  | 14.40565 | 0.009316 | XR_006686    |                      |
| A_44_P101023  | 0.487674  | 10.99103 | 0.008547 | XM_239335    | RGD1564778_predicted |
| A_44_P194863  | 0.470415  | 11.45454 | 0.005744 | XM_220574    | Spag7_predicted      |
| A_42_P573610  | 0.468416  | 7.658664 | 0.003621 | XM_233544    | Eif2c1_predicted     |
| A_44_P142843  | 0.46753   | 8.161509 | 0.009195 | XM_001065442 | LOC685834            |
| A_42_P707937  | 0.463584  | 13.34077 | 0.006472 | NM_080583    | Ap2b1                |
| A_44_P549028  | 0.462526  | 9.336237 | 0.005687 | XM_001076082 |                      |
| A_43_P17264   | 0.458705  | 8.929598 | 0.00814  | XM_240329    | RGD1565549_predicted |
| A_44_P720473  | 0.453531  | 8.555751 | 0.00795  | CA512655     |                      |
| A_44_P267155  | 0.448921  | 7.431128 | 0.008325 | XM_221887    |                      |
| A_44_P827752  | 0.443672  | 7.507669 | 0.008733 |              |                      |
| A_43_P18570   | 0.433168  | 7.264582 | 0.003564 | XM_236194    | Mll                  |
| A_43_P21027   | 0.433031  | 8.243299 | 0.007216 | XM_235023    | RGD1560606_predicted |
| A_44_P195291  | 0.431798  | 12.51609 | 0.002861 | XM_233382    | RGD1560252_predicted |
| A_43_P23298   | 0.431665  | 8.463371 | 0.003823 | XM_001079737 | RGD1311730_predicted |
| A_44_P1005858 | 0.428954  | 8.971588 | 0.009179 | CO404131     |                      |
| A_44_P147980  | 0.42782   | 8.163945 | 0.003669 | XM_576503    |                      |
| A_44_P546901  | 0.41725   | 7.567971 | 0.007509 | NM_012502    | Ar                   |
| A_44_P304493  | 0.417047  | 8.166562 | 0.005191 | NM_001024970 | RGD1305572           |
| A_43_P21762   | 0.387674  | 7.279607 | 0.007224 | NM_001013187 | Slc25a30             |
| A_44_P333550  | 0.370196  | 7.827262 | 0.009141 | NM_001013986 | LOC305076            |
| A_44_P119442  | 0.36235   | 11.97699 | 0.00757  | XM_216492    | Creb3                |
| A_44_P277126  | 0.362131  | 7.823398 | 0.007942 | XM_221369    |                      |
| A_44_P133226  | 0.361641  | 7.62301  | 0.007063 | XM_224852    | Stox2                |
| A_42_P601971  | 0.351093  | 7.762251 | 0.004338 | XM_220328    | Sox30_predicted      |
| A_42_P504240  | -0.304158 | 14.22476 | 0.007788 | XM_237998    |                      |

|               |           |          |          |              |                      |
|---------------|-----------|----------|----------|--------------|----------------------|
| A_44_P637629  | -0.337548 | 12.37837 | 0.008706 | DV727233     |                      |
| A_42_P771373  | -0.352053 | 15.04484 | 0.008398 | NM_012614    | Npy                  |
| A_44_P561760  | -0.371864 | 10.60745 | 0.009932 |              |                      |
| A_44_P479766  | -0.372905 | 7.061162 | 0.008134 | BM986564     |                      |
| A_44_P535706  | -0.375911 | 12.21228 | 0.007752 | XM_216485    |                      |
| A_42_P626023  | -0.381003 | 10.46022 | 0.006668 | XM_224232    | Cenpj_predicted      |
| A_44_P255384  | -0.383536 | 15.24025 | 0.009335 | XM_344225    | RGD1562394_predicted |
| A_42_P570848  | -0.388127 | 9.382288 | 0.007135 | NM_017091    | Pcsk1                |
| A_42_P791872  | -0.395678 | 15.20882 | 0.009108 | XM_001061587 | LOC682454            |
| A_44_P212695  | -0.39929  | 15.55995 | 0.00973  | XM_212890    |                      |
| A_42_P549321  | -0.402635 | 15.09135 | 0.003742 |              |                      |
| A_44_P473731  | -0.40425  | 15.44158 | 0.00932  | XM_220717    | Abr_predicted        |
| A_44_P762268  | -0.405311 | 13.79055 | 0.006136 |              |                      |
| A_44_P792063  | -0.406364 | 12.72072 | 0.003616 |              |                      |
| A_44_P593331  | -0.407158 | 11.10025 | 0.00566  |              |                      |
| A_44_P501390  | -0.410068 | 12.88181 | 0.009047 | XM_001055728 | RGD1561042_predicted |
| A_44_P884739  | -0.411871 | 14.79085 | 0.004969 | XM_219339    | Sez6l2_predicted     |
| A_44_P1043979 | -0.416159 | 15.46051 | 0.000961 | NM_001030052 | Ndufs5b              |
| A_44_P161709  | -0.418994 | 15.66453 | 0.005418 | XM_345662    |                      |
| A_42_P634674  | -0.420247 | 15.27808 | 0.008207 | NM_145783    | Cox5a                |
| A_43_P11268   | -0.420794 | 12.19783 | 0.007261 | NM_031762    | Cdkn1b               |
| A_44_P525486  | -0.440114 | 10.56008 | 0.009935 | XM_343841    | Plxnb3_predicted     |
| A_44_P592613  | -0.444442 | 11.81328 | 0.008322 | XM_576601    | RGD1560766_predicted |
| A_42_P703403  | -0.448031 | 15.45875 | 0.00121  | NM_031974    | CltA                 |
| A_44_P866539  | -0.448651 | 15.46571 | 0.003064 | AW913986     |                      |
| A_44_P554867  | -0.449101 | 13.80371 | 0.006241 | AW917688     |                      |
| A_44_P792470  | -0.456522 | 10.01488 | 0.00406  | DV722661     |                      |
| A_43_P10505   | -0.459756 | 15.07648 | 0.009444 | XM_226549    | Jph3_predicted       |
| A_44_P995316  | -0.460859 | 12.4553  | 0.007066 | XM_343081    | Sgpp1                |
| A_44_P1055366 | -0.461078 | 15.4244  | 0.005917 | AW919175     |                      |
| A_44_P914323  | -0.461087 | 14.00556 | 0.009917 | DV718684     |                      |
| A_43_P16707   | -0.462778 | 8.462194 | 0.007004 | NM_001004202 | Ccl6                 |
| A_44_P730454  | -0.463051 | 11.17696 | 0.009253 | XM_341399    | Mapk8                |
| A_42_P623151  | -0.46981  | 15.46891 | 0.002427 | NM_031026    | Dncli2               |
| A_44_P638345  | -0.46998  | 11.36836 | 0.009927 | NM_001034130 | Wasl                 |
| A_44_P152635  | -0.471578 | 7.525866 | 0.00501  | NM_021857    | Htr1f                |
| A_44_P822928  | -0.471616 | 12.19977 | 0.000854 |              |                      |
| A_44_P156922  | -0.473462 | 15.34944 | 0.008611 | NM_001008312 | Serinc3              |
| A_44_P745579  | -0.47912  | 11.5586  | 0.004111 |              |                      |
| A_44_P1031514 | -0.480469 | 12.12573 | 0.005639 | NM_001014054 | RGD1307778           |
| A_44_P361202  | -0.481728 | 13.36097 | 0.003147 | CB569688     |                      |
| A_42_P619248  | -0.48445  | 15.32374 | 0.005621 | XM_001053199 | RGD1560511_predicted |
| A_44_P392886  | -0.484852 | 15.8303  | 0.002919 | CB567353     | ND2                  |
| A_42_P614711  | -0.494634 | 10.99742 | 0.003489 | BF548552     |                      |
| A_42_P475623  | -0.495946 | 11.46603 | 0.007179 | NM_053394    | Klf5                 |
| A_43_P12692   | -0.497221 | 15.00459 | 0.008597 | NM_031814    | Git1                 |

|               |           |          |          |              |                      |
|---------------|-----------|----------|----------|--------------|----------------------|
| A_44_P727480  | -0.499614 | 12.44601 | 0.005736 | AW142602     |                      |
| A_44_P976007  | -0.501242 | 10.5042  | 0.007044 | DV719080     |                      |
| A_44_P357478  | -0.503165 | 7.182014 | 0.007098 | CK481254     |                      |
| A_44_P775118  | -0.503898 | 10.08036 | 0.002595 | NM_001014205 | Tmem123              |
| A_44_P372261  | -0.505527 | 7.827664 | 0.00773  | NM_053372    | Slpi                 |
| A_44_P965429  | -0.506297 | 11.15919 | 0.009965 |              |                      |
| A_44_P393551  | -0.507718 | 15.04609 | 0.006586 | NM_012567    | Gja1                 |
| A_44_P700333  | -0.507758 | 11.50827 | 0.001397 | CX570601     |                      |
| A_43_P15460   | -0.50937  | 11.70692 | 0.008183 | NM_053879    | Cntn4                |
| A_44_P299247  | -0.515458 | 14.98393 | 0.00915  | NM_012778    | Aqp1                 |
| A_44_P311334  | -0.516913 | 8.09389  | 0.007592 | L27060       | Pde4d                |
| A_44_P996952  | -0.517441 | 9.262775 | 0.007491 | NM_001039454 | RGD1561028           |
| A_44_P373681  | -0.517613 | 11.90056 | 0.008317 | BF563424     |                      |
| A_42_P544321  | -0.521129 | 10.1151  | 0.007505 | AI136185     |                      |
| A_44_P791696  | -0.521548 | 11.62472 | 0.003333 | DV725758     |                      |
| A_44_P493603  | -0.525791 | 11.8103  | 0.007827 | DY472377     |                      |
| A_44_P270700  | -0.537381 | 15.29789 | 0.002379 | BG663460     |                      |
| A_42_P521814  | -0.537861 | 11.63224 | 0.009573 |              |                      |
| A_44_P640301  | -0.54291  | 13.82233 | 0.0009   | XM_001065707 | RGD1566031_predicted |
| A_42_P525317  | -0.54563  | 11.28367 | 0.006987 | NM_053851    | Cacnb2               |
| A_44_P884444  | -0.546077 | 10.18235 | 0.001586 | XM_343782    | RGD1563952_predicted |
| A_44_P650550  | -0.558033 | 11.4954  | 0.001961 | BF289404     |                      |
| A_43_P11492   | -0.559424 | 7.373786 | 0.002587 | NM_012629    | Prl                  |
| A_42_P839655  | -0.561899 | 14.45612 | 0.003112 | BF555716     |                      |
| A_44_P443657  | -0.564112 | 12.11021 | 0.008022 | BI281988     |                      |
| A_44_P655666  | -0.576235 | 10.32947 | 0.003753 |              |                      |
| A_42_P503281  | -0.577323 | 11.59358 | 0.002812 | NM_053603    | Clic5                |
| A_43_P12283   | -0.579016 | 12.80167 | 0.004402 | NM_022668    | Mog                  |
| A_44_P884766  | -0.5965   | 15.49362 | 0.000367 |              |                      |
| A_44_P702115  | -0.601856 | 10.62476 | 0.003276 |              |                      |
| A_44_P283909  | -0.609549 | 9.066482 | 0.008587 | XM_216079    |                      |
| A_44_P175677  | -0.618299 | 7.45903  | 0.001548 | XM_001062365 | LOC685114            |
| A_44_P386633  | -0.630651 | 13.84789 | 0.00755  | NM_145785    | Hdgfrp3              |
| A_44_P956310  | -0.631047 | 7.415374 | 0.005342 | AI171999     |                      |
| A_42_P621736  | -0.6312   | 15.79036 | 0.005605 | NM_001007604 | Rplp1                |
| A_44_P469517  | -0.631758 | 9.924125 | 0.005796 | BF551572     |                      |
| A_44_P605123  | -0.644716 | 10.78691 | 0.005895 | DV716579     |                      |
| A_44_P770724  | -0.651454 | 10.89887 | 0.002755 | XM_225941    | Dmxl1_predicted      |
| A_44_P1017996 | -0.663612 | 11.77483 | 0.00737  | XM_341470    | LOC361188            |
| A_44_P350074  | -0.666196 | 14.75075 | 0.004962 | XM_001075009 | LOC686892            |
| A_44_P914438  | -0.668649 | 10.16228 | 0.009157 | NM_080782    | Cdkn1a               |
| A_44_P593071  | -0.674446 | 7.774681 | 0.003372 |              |                      |
| A_42_P575140  | -0.683968 | 11.45806 | 0.009127 | AW916021     |                      |
| A_44_P652899  | -0.703191 | 15.67359 | 0.004507 | NM_178105    | Gpm6a                |
| A_44_P793157  | -0.711691 | 9.441904 | 0.005513 |              |                      |
| A_44_P416127  | -0.713822 | 14.78112 | 0.002027 | BG665128     |                      |

|               |           |          |          |              |                 |
|---------------|-----------|----------|----------|--------------|-----------------|
| A_44_P123857  | -0.729971 | 7.392116 | 0.00623  | XM_227855    |                 |
| A_44_P576019  | -0.731695 | 9.762224 | 0.009106 |              |                 |
| A_44_P556677  | -0.742666 | 12.03146 | 0.004327 | AW525326     |                 |
| A_44_P531685  | -0.774814 | 15.7317  | 0.002598 | NM_212511    | Rpl35           |
| A_42_P484738  | -0.777717 | 10.55331 | 0.009229 | NM_022266    | Ctgf            |
| A_44_P976667  | -0.778059 | 11.33574 | 0.002631 |              |                 |
| A_44_P575265  | -0.78268  | 7.162824 | 0.005089 | XM_001059898 |                 |
| A_44_P341298  | -0.801823 | 10.7338  | 0.001651 | BF396386     |                 |
| A_44_P684912  | -0.868223 | 11.62549 | 0.004168 |              |                 |
| A_44_P344475  | -0.871819 | 11.22742 | 0.007204 | NM_053522    | Rhoq            |
| A_44_P608966  | -0.898967 | 11.02197 | 0.002516 |              |                 |
| A_42_P783113  | -0.940675 | 15.01051 | 0.008372 | XM_215044    |                 |
| A_44_P728524  | -0.948968 | 8.649392 | 0.004864 | XM_218037    | Zfp54_predicted |
| A_44_P353618  | -1.598265 | 10.41172 | 0.006037 | NM_053587    | S100a9          |
| A_44_P1055780 | -1.799489 | 9.625261 | 0.00237  | NM_053822    | S100a8          |

Table S2

| ID            | logFC    | AveExpr  | P.Value  | GenbankAccession | GeneSymbol           |
|---------------|----------|----------|----------|------------------|----------------------|
| A_44_P255954  | 1.092079 | 11.34905 | 0.004114 | XM_573223        | RGD1566063_predicted |
| A_43_P16512   | 0.958391 | 12.84756 | 0.005599 | XM_218824        | RGD1311021_predicted |
| A_44_P199211  | 0.888268 | 13.1782  | 0.007    | NM_001077641     | Plcb1                |
| A_44_P519174  | 0.865479 | 10.15332 | 0.001505 | NM_001015027     | Crebl2               |
| A_44_P797926  | 0.827698 | 11.582   | 0.003393 | BG673275         |                      |
| A_44_P638014  | 0.786066 | 9.362983 | 0.001642 | XM_001067431     | Irf6_predicted       |
| A_44_P253196  | 0.72852  | 10.6956  | 0.000407 | XM_228114        | Arid5b_predicted     |
| A_44_P817120  | 0.705276 | 10.23002 | 0.000413 | BF563826         |                      |
| A_44_P764308  | 0.70371  | 12.43124 | 0.00571  |                  |                      |
| A_44_P515211  | 0.702895 | 9.195753 | 0.000603 | NM_145765        | Tnfsf15              |
| A_44_P405203  | 0.692478 | 10.26765 | 0.001054 | XM_218664        | Hebp2_predicted      |
| A_44_P314492  | 0.692285 | 10.13554 | 0.004549 | XM_221672        | Tiam1                |
| A_44_P108421  | 0.689739 | 9.564137 | 0.006015 | XM_224350        | Fndc3a_predicted     |
| A_44_P274573  | 0.681768 | 9.295892 | 0.000701 | XM_232283        | Plxnd1_predicted     |
| A_44_P525431  | 0.678326 | 10.94687 | 0.001897 |                  |                      |
| A_43_P11622   | 0.670731 | 14.22093 | 0.009935 | NM_012925        | Cd59                 |
| A_44_P1050433 | 0.669816 | 10.15768 | 0.008041 | XM_001078552     | LOC691501            |
| A_43_P19994   | 0.651395 | 9.365389 | 0.004094 | XM_233485        | Rlf_predicted        |
| A_44_P473472  | 0.649492 | 10.61491 | 0.003372 | BC091233         | RGD1307434_predicted |
| A_44_P168514  | 0.64246  | 9.344473 | 0.001894 | XM_226964        | Zfhx4_predicted      |
| A_44_P377645  | 0.63785  | 8.537705 | 0.000763 | XM_342774        |                      |
| A_44_P300612  | 0.625149 | 10.59645 | 0.008106 | NM_022850        | Dpp6                 |
| A_43_P17175   | 0.624011 | 8.564087 | 0.001089 | NM_001031642     | Serpinb1a            |
| A_43_P17180   | 0.623162 | 11.83235 | 0.002449 | NM_001007696     | mrpl9                |
| A_44_P323430  | 0.620476 | 9.88312  | 0.008344 | NM_138532        | Nme7                 |
| A_44_P422271  | 0.600331 | 10.07162 | 0.00451  | XM_217019        | Cerk_predicted       |
| A_44_P525645  | 0.592939 | 8.785316 | 0.008531 | XM_220442        |                      |
| A_44_P175495  | 0.59217  | 7.297441 | 0.003832 | NM_182952        | Cxcl11               |
| A_44_P163242  | 0.587393 | 8.543951 | 0.00271  | NM_138541        | Tacstd1              |
| A_44_P102291  | 0.58478  | 9.037239 | 0.001128 | XM_341619        | Adamts19_predicted   |
| A_43_P10020   | 0.579306 | 12.71223 | 0.009383 | NM_012771        | Lyz                  |
| A_44_P522492  | 0.577851 | 8.866765 | 0.002137 | NM_133414        | Clcc1                |
| A_44_P348973  | 0.574847 | 8.505955 | 0.006247 | NM_001004277     | Lypla3               |
| A_44_P160846  | 0.574796 | 8.886562 | 0.000923 | NM_182673        | Rnasel               |
| A_44_P1027904 | 0.574744 | 12.94124 | 0.003016 | XM_213794        | Pop5_predicted       |
| A_44_P269425  | 0.57387  | 10.3993  | 0.005824 | NM_133415        | Efcbp2               |
| A_43_P17880   | 0.572611 | 8.703786 | 0.003833 | NM_182953        | Nek6                 |
| A_44_P440633  | 0.569351 | 10.4556  | 0.0078   | NM_031639        | Dlgh3                |
| A_44_P255236  | 0.561685 | 9.239359 | 0.006445 | NM_019212        | Acta1                |
| A_44_P469113  | 0.561279 | 9.121905 | 0.004531 | XM_220779        | Slfn2_predicted      |
| A_42_P744464  | 0.559015 | 8.758601 | 0.006845 | XM_340740        | RGD1565449_predicted |
| A_44_P247219  | 0.558874 | 9.764186 | 0.001307 | NM_053699        | Cited4               |
| A_42_P453976  | 0.554018 | 9.751298 | 0.000729 | XM_219476        | Ifitm6_predicted     |
| A_44_P191022  | 0.553331 | 11.25682 | 0.006487 | NM_053674        | Phyh                 |
| A_44_P492629  | 0.552641 | 11.97851 | 0.003115 | DV727624         | LOC497975            |
| A_43_P10824   | 0.546754 | 11.88143 | 0.00131  | NM_001015010     | Cib2                 |
| A_43_P18186   | 0.539919 | 10.43356 | 0.008235 | XM_232226        | Pdzn3_predicted      |

|               |          |          |          |              |                      |
|---------------|----------|----------|----------|--------------|----------------------|
| A_44_P408520  | 0.539577 | 10.59062 | 0.006601 | NM_031569    | Opr1                 |
| A_44_P189813  | 0.539428 | 9.934035 | 0.006284 | XM_214295    | Glt25d1_predicted    |
| A_44_P150471  | 0.535326 | 12.78451 | 0.00827  | NM_031696    | Gpr88                |
| A_43_P12802   | 0.5329   | 12.46216 | 0.00132  | NM_053418    | Ufd1l                |
| A_44_P445369  | 0.532457 | 8.410379 | 0.004245 | XM_001080476 | LOC360824            |
| A_44_P114184  | 0.525917 | 10.4511  | 0.003452 | NM_022543    | Ssg1                 |
| A_44_P134634  | 0.519467 | 9.390154 | 0.008789 | CB576476     | RGD1562272_predicted |
| A_44_P309523  | 0.516512 | 10.28453 | 0.007552 | XM_001076269 | LOC501230            |
| A_44_P273449  | 0.514881 | 8.7635   | 0.008173 | XM_214953    | Perp_predicted       |
| A_44_P823303  | 0.512983 | 7.675391 | 0.004082 |              |                      |
| A_44_P729266  | 0.503142 | 7.240329 | 0.001277 | XR_005718    | LOC300506            |
| A_43_P18294   | 0.500507 | 7.598985 | 0.003877 | BC099835     |                      |
| A_44_P314353  | 0.499854 | 9.286162 | 0.008369 | NM_001037765 | RGD1306649           |
| A_44_P288241  | 0.496253 | 8.737087 | 0.006619 | XM_341029    | RGD1307396_predicted |
| A_44_P167408  | 0.492468 | 9.154808 | 0.007935 | AW144014     |                      |
| A_44_P229051  | 0.492248 | 7.852318 | 0.00518  | NM_012748    | Epim                 |
| A_44_P668388  | 0.490809 | 12.07127 | 0.004134 | BC098022     | RGD1561494_predicted |
| A_44_P408108  | 0.475979 | 9.272041 | 0.008532 | XM_236649    | Nbeal2_predicted     |
| A_44_P189953  | 0.471873 | 9.605232 | 0.008348 | NM_031769    | Pdxk                 |
| A_44_P549028  | 0.471493 | 9.336237 | 0.004959 | XM_001076082 |                      |
| A_42_P839541  | 0.466727 | 8.176077 | 0.008615 | NM_001007671 | Cyb5d2               |
| A_44_P252756  | 0.466033 | 9.749369 | 0.008365 | XM_221874    |                      |
| A_44_P655158  | 0.462016 | 10.96723 | 0.003263 | CO567276     |                      |
| A_44_P426624  | 0.46039  | 9.187297 | 0.002826 | XM_344380    |                      |
| A_43_P23215   | 0.456773 | 10.24316 | 0.001849 | NM_001025737 | Smpdl3b              |
| A_44_P299123  | 0.452931 | 7.997765 | 0.006893 | XM_215847    | Nphp1_predicted      |
| A_44_P456747  | 0.438792 | 8.694571 | 0.005099 | AB012231     | Nfib                 |
| A_44_P237220  | 0.438141 | 9.322389 | 0.003965 | XM_214720    |                      |
| A_44_P148280  | 0.437942 | 12.38004 | 0.007917 | NM_053670    | Crcp                 |
| A_43_P10534   | 0.434336 | 11.85153 | 0.00493  | NM_001034108 | Mar.02               |
| A_44_P332817  | 0.430724 | 12.22793 | 0.008347 | NM_053527    | Cdc5l                |
| A_43_P20794   | 0.418891 | 8.354658 | 0.007973 | BC091326     | Osbp15               |
| A_44_P483177  | 0.416901 | 11.34909 | 0.006728 | NM_001009344 | Tbrg1                |
| A_43_P19369   | 0.414985 | 8.634819 | 0.008199 | XM_219805    | Prkg1_predicted      |
| A_44_P545649  | 0.410999 | 7.755706 | 0.001615 | NM_001014093 | Parp16               |
| A_44_P111825  | 0.410741 | 8.817684 | 0.006841 | NM_001014144 | RGD1305679           |
| A_44_P1051765 | 0.405347 | 11.08866 | 0.005446 | XM_342984    | Thap3_predicted      |
| A_44_P109834  | 0.401496 | 7.550092 | 0.006214 | XM_341783    | Rdh13_predicted      |
| A_44_P809514  | 0.398808 | 7.858837 | 0.00334  |              |                      |
| A_44_P1038400 | 0.394146 | 12.34258 | 0.005052 | DV727624     | LOC497975            |
| A_43_P10315   | 0.393843 | 8.182339 | 0.009911 | XM_341626    | Gnal                 |
| A_44_P289173  | 0.390852 | 9.276699 | 0.007259 | BC097985     | Grtp1                |
| A_44_P187300  | 0.390448 | 8.451293 | 0.008284 | XM_344202    |                      |
| A_44_P228903  | 0.389952 | 7.646097 | 0.001145 | NM_078621    | Ccbp2                |
| A_44_P532500  | 0.387401 | 9.399204 | 0.008349 | XM_217354    |                      |
| A_43_P12267   | 0.380794 | 7.482954 | 0.00323  | NM_022623    | Fzd4                 |
| A_44_P424069  | 0.380306 | 7.490027 | 0.006055 | XM_218463    | Zfp84_predicted      |
| A_44_P370082  | 0.379629 | 12.25524 | 0.005576 | XM_340856    | Timm22               |
| A_43_P15129   | 0.377676 | 7.558528 | 0.009304 | BF558849     |                      |

|               |           |          |          |              |                      |
|---------------|-----------|----------|----------|--------------|----------------------|
| A_44_P349817  | 0.373434  | 7.119817 | 0.006636 | XM_237215    | LOC301455            |
| A_44_P1010416 | 0.365499  | 8.425505 | 0.003415 | NM_001002853 | P2ry13               |
| A_44_P447927  | 0.362439  | 7.278709 | 0.004074 |              |                      |
| A_44_P356482  | 0.359146  | 7.30241  | 0.008106 |              |                      |
| A_44_P119442  | 0.353803  | 11.97699 | 0.00886  | XM_216492    | Creb3                |
| A_44_P409539  | 0.350217  | 7.44798  | 0.004442 | NM_175869    | Plod2                |
| A_44_P407800  | 0.350096  | 7.710196 | 0.001764 | XM_225607    |                      |
| A_43_P17282   | 0.349379  | 7.370769 | 0.00758  | XM_219879    | Cnmn1_predicted      |
| A_42_P809101  | 0.345238  | 10.43971 | 0.005251 | XM_342873    | Tctex1d1_predicted   |
| A_44_P468816  | 0.340427  | 7.136901 | 0.008588 | XM_001057103 |                      |
| A_42_P601971  | 0.333952  | 7.762251 | 0.006207 | XM_220328    | Sox30_predicted      |
| A_44_P398433  | 0.328459  | 7.746764 | 0.00909  | XM_224923    | Tnks_predicted       |
| A_44_P156846  | 0.326852  | 7.465644 | 0.009923 | XM_231139    | Lamc3_predicted      |
| A_44_P370774  | 0.321406  | 7.045656 | 0.007011 | XM_235183    | Irak3_predicted      |
| A_44_P260384  | 0.313235  | 7.263999 | 0.00804  | XM_240915    | RGD1307915_predicted |
| A_44_P388709  | 0.279068  | 7.125181 | 0.007876 | NM_145767    | Prrxl1               |
| A_44_P591036  | -0.312213 | 7.029821 | 0.008327 | XM_001069503 | LOC685839            |
| A_43_P11492   | -0.341474 | 7.590819 | 0.006493 | NM_012629    | Prl                  |
| A_44_P229557  | -0.344053 | 10.42845 | 0.008754 | XM_230513    | RGD1561554_predicted |
| A_44_P518050  | -0.364194 | 11.07642 | 0.004205 | XM_223566    | Sf3a1_predicted      |
| A_44_P184865  | -0.377312 | 14.20673 | 0.007668 | NM_031579    | Ptp4a1               |
| A_44_P1002407 | -0.383112 | 12.21029 | 0.009369 | AI137378     |                      |
| A_44_P334736  | -0.388138 | 8.79879  | 0.002976 | NM_012548    | Edn1                 |
| A_44_P839802  | -0.389477 | 7.467368 | 0.008537 |              |                      |
| A_44_P307646  | -0.395441 | 7.041288 | 0.007608 | BI289723     |                      |
| A_44_P420046  | -0.409126 | 8.398432 | 0.009059 | NM_021669    | Ghrl                 |
| A_42_P736812  | -0.412467 | 13.07906 | 0.004888 | NM_134449    | Prkcdbp              |
| A_44_P777113  | -0.4134   | 11.74969 | 0.008401 | XM_001068152 | LOC684233            |
| A_42_P840867  | -0.416389 | 11.51094 | 0.005105 | XR_008037    | RGD1561455_predicted |
| A_44_P597013  | -0.422945 | 9.936548 | 0.006715 |              |                      |
| A_44_P288443  | -0.423627 | 10.61669 | 0.00444  | XM_344542    | Thsd1_predicted      |
| A_43_P13326   | -0.425342 | 9.86345  | 0.003719 | NM_138894    | Grasp                |
| A_44_P110334  | -0.427016 | 7.55124  | 0.004078 | XM_236387    | RGD1560796_predicted |
| A_43_P23304   | -0.429392 | 11.02713 | 0.004137 | NM_199397    | Panx1                |
| A_44_P428338  | -0.437758 | 7.45371  | 0.000983 | AA817984     |                      |
| A_44_P1050510 | -0.440611 | 8.275122 | 0.007818 | XM_001075804 | LOC686809            |
| A_44_P127962  | -0.442185 | 9.386424 | 0.006015 | NM_181771    | Gpr135               |
| A_44_P379645  | -0.450221 | 7.565198 | 0.004867 | AF030090     |                      |
| A_44_P578593  | -0.4523   | 9.756066 | 0.004554 |              |                      |
| A_43_P18201   | -0.452482 | 11.10478 | 0.007172 | XM_230639    | Zfp339_predicted     |
| A_44_P283372  | -0.452635 | 15.04796 | 0.00478  | BC062235     | Hnrpa1               |
| A_44_P960490  | -0.453901 | 13.07605 | 0.005162 | XM_573497    |                      |
| A_44_P171321  | -0.460493 | 12.38677 | 0.003954 | NM_001009671 | RGD1359509           |
| A_42_P737455  | -0.463557 | 12.01383 | 0.00428  | AI071866     |                      |
| A_44_P182739  | -0.466768 | 8.675444 | 0.009307 | XM_217651    | Pdzk8_predicted      |
| A_44_P853624  | -0.468433 | 10.94544 | 0.006035 | XM_237855    | RGD1308321_predicted |
| A_44_P650550  | -0.475469 | 11.4954  | 0.00659  | BF289404     |                      |
| A_44_P745585  | -0.483808 | 11.0584  | 0.00908  | NM_001024309 | LOC499749            |
| A_44_P376411  | -0.489603 | 13.76028 | 0.007865 | BF548067     |                      |



|               |           |          |          |              |                      |
|---------------|-----------|----------|----------|--------------|----------------------|
| A_44_P885461  | -0.491508 | 11.36357 | 0.002118 |              |                      |
| A_44_P976153  | -0.492456 | 13.56608 | 0.002154 |              |                      |
| A_44_P792746  | -0.494639 | 12.61698 | 0.003912 |              |                      |
| A_43_P14760   | -0.495239 | 8.143939 | 0.006653 |              |                      |
| A_44_P578847  | -0.497309 | 11.57353 | 0.005959 |              |                      |
| A_44_P1031380 | -0.49908  | 7.921169 | 0.009759 | XM_001077462 |                      |
| A_44_P808218  | -0.499845 | 10.42192 | 0.006617 | XM_233470    | RGD1311937_predicted |
| A_44_P278659  | -0.509675 | 11.62496 | 0.001616 | AJ517196     |                      |
| A_44_P988767  | -0.510231 | 9.065142 | 0.004772 | BF564195     |                      |
| A_42_P475623  | -0.519306 | 11.46603 | 0.005213 | NM_053394    | Klf5                 |
| A_44_P653818  | -0.5195   | 11.96479 | 0.002595 |              |                      |
| A_44_P254238  | -0.519538 | 12.83616 | 0.005937 | NM_001033670 | Bcl2l1               |
| A_44_P635089  | -0.520099 | 14.54726 | 0.000703 | AI030078     |                      |
| A_44_P724632  | -0.522737 | 10.62241 | 0.006501 | AI176008     |                      |
| A_44_P1026631 | -0.523563 | 12.89669 | 0.008387 | XM_573823    | Akap11               |
| A_44_P840348  | -0.530728 | 11.49232 | 0.00838  |              |                      |
| A_44_P559242  | -0.532673 | 9.055327 | 0.004592 | XM_001065920 |                      |
| A_42_P570848  | -0.544448 | 9.382288 | 0.000431 | NM_017091    | Pcsk1                |
| A_44_P175677  | -0.555101 | 7.45903  | 0.00369  | XM_001062365 | LOC685114            |
| A_42_P788810  | -0.562441 | 11.15106 | 0.008966 | AW918709     |                      |
| A_44_P837846  | -0.574638 | 11.59704 | 0.005446 | DV723320     |                      |
| A_44_P895064  | -0.576006 | 8.930311 | 0.00887  | XM_341290    | RGD1562692_predicted |
| A_44_P570046  | -0.577647 | 10.78454 | 0.007289 | XM_001067059 | LOC314964            |
| A_42_P502759  | -0.58777  | 14.49019 | 0.00567  | XM_343513    | Aplp2                |
| A_44_P249774  | -0.594975 | 8.836396 | 0.009915 | BG668003     | LOC688621            |
| A_44_P731912  | -0.601613 | 10.58883 | 0.006816 |              |                      |
| A_42_P638620  | -0.608517 | 7.700495 | 0.003204 | NM_130741    | Lcn2                 |
| A_44_P181718  | -0.61556  | 8.066556 | 0.003116 | BI285476     |                      |
| A_44_P521587  | -0.616852 | 13.53308 | 0.00098  | XM_224588    | Arhgef3_predicted    |
| A_44_P374708  | -0.619325 | 11.886   | 0.0085   | NM_198750    | Cry1                 |
| A_44_P962074  | -0.632751 | 9.587462 | 0.006478 |              |                      |
| A_44_P551872  | -0.637831 | 8.523936 | 0.009835 | AI555745     |                      |
| A_42_P556083  | -0.641374 | 11.39813 | 0.009144 | NM_013165    | Cckbr                |
| A_44_P492624  | -0.643134 | 9.667534 | 0.000409 | XM_340867    |                      |
| A_44_P472989  | -0.643421 | 10.67878 | 0.003461 | NM_017232    | Ptgs2                |
| A_44_P199107  | -0.65155  | 7.152713 | 0.003241 | XM_345241    | RGD1562545_predicted |
| A_44_P341298  | -0.654523 | 10.7338  | 0.007667 | BF396386     |                      |
| A_43_P12535   | -0.655373 | 13.32748 | 0.009243 | NM_031135    | Klf10                |
| A_43_P14919   | -0.660635 | 12.98223 | 0.002117 | NM_019372    | Ppm2c                |
| A_43_P12283   | -0.667059 | 12.80167 | 0.001419 | NM_022668    | Mog                  |
| A_44_P776423  | -0.671757 | 12.77633 | 0.001579 | NM_001017386 | Tmem10               |
| A_44_P559239  | -0.692896 | 8.905563 | 0.004793 | AW921223     |                      |
| A_44_P1034541 | -0.694564 | 12.09181 | 0.001515 | NM_022602    | Pim3                 |
| A_44_P254130  | -0.701323 | 10.04192 | 0.000593 | AA875032     |                      |
| A_44_P337351  | -0.707538 | 13.17046 | 0.00034  | NM_001033883 | Cxcl12               |
| A_44_P593071  | -0.709574 | 7.774681 | 0.002257 |              |                      |
| A_44_P221885  | -0.71164  | 11.43124 | 0.005104 | BF565038     |                      |
| A_44_P589346  | -0.723727 | 11.5605  | 0.003934 | DY471743     |                      |
| A_42_P762508  | -0.757283 | 9.97503  | 0.000872 | NM_001034199 | Nptx2                |

|               |           |          |          |              |                      |
|---------------|-----------|----------|----------|--------------|----------------------|
| A_44_P670185  | -0.758857 | 10.81712 | 0.00219  |              |                      |
| A_44_P823528  | -0.760627 | 10.71223 | 0.000555 |              |                      |
| A_42_P681722  | -0.767592 | 10.37324 | 0.00117  | BF554576     |                      |
| A_44_P870183  | -0.771142 | 10.51029 | 0.007791 |              |                      |
| A_42_P739860  | -0.772039 | 11.50895 | 0.005963 | NM_133578    | Dusp5                |
| A_44_P914438  | -0.778529 | 10.16228 | 0.003109 | NM_080782    | Cdkn1a               |
| A_44_P219026  | -0.785466 | 10.94052 | 0.002205 | NM_012513    | Bdnf                 |
| A_44_P732510  | -0.804474 | 8.797511 | 0.008231 | DV722942     |                      |
| A_44_P307971  | -0.824418 | 12.49927 | 0.004772 | L04739       |                      |
| A_44_P807565  | -0.830688 | 10.52499 | 0.002158 |              |                      |
| A_44_P1029253 | -0.914823 | 10.58408 | 0.002969 | NM_012757    | Mas1                 |
| A_44_P378959  | -0.933023 | 11.30108 | 5.98E-06 | AA859348     |                      |
| A_44_P763434  | -0.945217 | 10.5241  | 0.005537 | XM_576579    | RGD1560005_predicted |
| A_44_P437896  | -0.953692 | 10.65054 | 1.17E-05 | NM_012513    | Bdnf                 |
| A_44_P303430  | -0.964636 | 12.90879 | 5.44E-06 | AW142654     |                      |
| A_44_P916210  | -0.990373 | 15.19466 | 0.001296 |              |                      |
| A_44_P522524  | -0.9989   | 9.086332 | 0.000509 | NM_019328    | Nr4a2                |
| A_44_P931389  | -1.006772 | 11.03869 | 0.002907 | CA509267     |                      |
| A_44_P1032732 | -1.010129 | 9.622861 | 0.006732 | NM_031740    | B4galt6              |
| A_42_P839593  | -1.017323 | 11.81139 | 0.002422 | AW142999     |                      |
| A_44_P424723  | -1.05196  | 11.14587 | 0.005727 | NM_021693    | Snf1lk               |
| A_42_P484738  | -1.143309 | 10.55331 | 0.000399 | NM_022266    | Ctgf                 |
| A_44_P512806  | -1.18274  | 7.98503  | 0.000782 | NM_153626    | Npas4                |
| A_44_P654444  | -1.185412 | 12.51873 | 8.56E-06 | DQ268830     | Nr4a3                |
| A_44_P365379  | -1.251433 | 11.97297 | 0.000967 | NM_001077640 | Gadd45g              |
| A_42_P594613  | -1.298603 | 11.44392 | 0.000322 | NM_053883    | Dusp6                |
| A_42_P540950  | -1.311262 | 12.17803 | 0.004526 | NM_001009541 | Ier2                 |
| A_44_P233080  | -1.323167 | 14.34415 | 9.76E-05 | NM_012551    | Egr1                 |
| A_44_P701809  | -1.392299 | 9.465179 | 0.000511 |              |                      |
| A_44_P591857  | -1.393798 | 11.97394 | 0.000557 |              |                      |
| A_42_P708068  | -1.414561 | 13.68879 | 5.27E-05 | NM_019137    | Egr4                 |
| A_44_P560710  | -1.449866 | 9.965458 | 0.000353 |              |                      |
| A_44_P495480  | -1.508251 | 10.05032 | 0.001411 | NM_022197    | Fos                  |
| A_43_P12619   | -1.588268 | 12.07253 | 0.000459 | NM_031628    | Nr4a3                |
| A_44_P212803  | -1.612143 | 13.06959 | 0.002631 | AF050659     |                      |
| A_43_P12125   | -1.615114 | 11.49742 | 0.003416 | NM_021836    | Junb                 |
| A_44_P218896  | -1.65862  | 9.205401 | 0.006471 | NM_031327    | Cyr61                |
| A_44_P398142  | -1.690248 | 12.12949 | 0.002178 | NM_017259    | Btg2                 |
| A_44_P380835  | -1.72043  | 11.95836 | 1.00E-05 | AB003726     | Homer1               |
| A_44_P839581  | -1.759771 | 11.1114  | 0.000537 |              |                      |
| A_42_P682589  | -1.881937 | 13.8678  | 0.000267 | NM_024388    | Nr4a1                |
| A_43_P11932   | -2.061968 | 9.928836 | 0.000533 | NM_017352    | Nr4a3                |
| A_42_P750683  | -2.096022 | 9.035922 | 0.000742 | NM_031327    | Cyr61                |
| A_44_P118724  | -2.159492 | 14.27586 | 4.76E-05 | NM_019361    | Arc                  |
| A_42_P473594  | -2.43313  | 11.62043 | 3.64E-06 | NM_053633    | Egr2                 |

Table S3

| ID            | logFC    | AveExpr  | P.Value  | GenbankAccession | GeneSymbol           |
|---------------|----------|----------|----------|------------------|----------------------|
| A_44_P839581  | 1.478474 | 11.1114  | 0.002504 |                  |                      |
| A_44_P157527  | 1.190031 | 9.92948  | 0.000759 | BF285469         |                      |
| A_44_P535706  | 1.064651 | 12.24392 | 0.008651 | XM_216485        |                      |
| A_42_P525886  | 1.056686 | 10.01648 | 0.004039 | XM_236253        | Crabp1               |
| A_44_P262625  | 0.984094 | 10.4371  | 0.002967 | XM_344424        |                      |
| A_44_P217250  | 0.951383 | 10.90076 | 0.00608  | NM_012949        | Eno3                 |
| A_44_P478637  | 0.946374 | 8.477595 | 0.000206 | BI274236         |                      |
| A_42_P679251  | 0.920972 | 10.74394 | 0.00304  | NM_031503        | Ascl2                |
| A_44_P931389  | 0.919886 | 11.03869 | 0.005691 | CA509267         |                      |
| A_44_P913689  | 0.915771 | 12.44902 | 0.003316 |                  |                      |
| A_43_P16887   | 0.914468 | 10.50225 | 0.006547 | XM_215059        | Eraf_predicted       |
| A_44_P479890  | 0.912017 | 9.666256 | 0.000903 | NM_153821        | Prrx1                |
| A_42_P793008  | 0.908714 | 15.02889 | 0.007719 | NM_130432        | Rps13                |
| A_44_P231657  | 0.907535 | 10.83999 | 0.000947 | XM_341779        | Zfp628_predicted     |
| A_43_P14752   | 0.898158 | 10.27264 | 0.000507 | XM_001073940     | LOC690274            |
| A_44_P236566  | 0.897017 | 9.874991 | 0.000944 | XM_230848        | Neurl2_predicted     |
| A_44_P671992  | 0.894022 | 11.10745 | 3.85E-05 | XM_575387        | RGD1566201_predicted |
| A_43_P16949   | 0.846619 | 9.382546 | 0.006384 | XM_220884        | Sgca_predicted       |
| A_43_P11563   | 0.835843 | 9.280827 | 0.00022  | NM_012784        | Cnr1                 |
| A_44_P685508  | 0.821372 | 10.87674 | 0.005479 |                  |                      |
| A_44_P743576  | 0.820139 | 10.21146 | 0.001612 | AW917533         |                      |
| A_44_P1009948 | 0.806853 | 12.19187 | 0.002096 | XM_220532        | RGD1304587           |
| A_44_P252855  | 0.803766 | 10.96382 | 0.000453 |                  |                      |
| A_44_P853254  | 0.800247 | 10.52673 | 0.005443 |                  |                      |
| A_44_P197290  | 0.792545 | 9.481667 | 0.001253 | NM_021760        | Col5a3               |
| A_44_P588759  | 0.792232 | 10.76386 | 0.000334 | BF563670         |                      |
| A_44_P543813  | 0.776085 | 10.17043 | 0.005401 | XM_228345        | Ascc3_predicted      |
| A_44_P974651  | 0.774859 | 10.43947 | 0.000564 | XM_575260        | RGD1564048_predicted |
| A_42_P635881  | 0.773147 | 11.75922 | 0.000466 | NM_031782        | Slc32a1              |
| A_44_P558838  | 0.769348 | 9.104969 | 0.00724  | BF417038         |                      |
| A_44_P413324  | 0.763004 | 10.31502 | 0.00565  | BF558477         |                      |
| A_44_P307308  | 0.761818 | 9.460592 | 0.008579 | XM_237568        | LOC301725            |
| A_43_P11044   | 0.760943 | 11.9497  | 0.003488 | NM_001009632     | G0s2                 |
| A_44_P409913  | 0.750951 | 8.847053 | 0.008251 | XM_341043        |                      |
| A_44_P685354  | 0.747361 | 8.734705 | 0.001885 |                  |                      |
| A_42_P596942  | 0.746022 | 8.598174 | 8.19E-05 | NM_145682        | Filip1               |
| A_42_P568943  | 0.738116 | 8.151025 | 0.007983 | XM_217167        | RGD1311874_predicted |
| A_44_P592800  | 0.732669 | 10.93803 | 0.001284 |                  |                      |
| A_44_P233786  | 0.73062  | 14.31421 | 0.002362 | NM_030997        | Vgf                  |
| A_44_P461587  | 0.727787 | 10.34052 | 0.000607 | XM_341847        | RGD1311142_predicted |
| A_44_P808072  | 0.727337 | 10.73465 | 0.007333 |                  |                      |
| A_43_P11082   | 0.723487 | 10.05847 | 0.003035 |                  |                      |
| A_44_P304759  | 0.722884 | 9.750024 | 0.003913 | XR_007322        | RGD1563459_predicted |
| A_44_P670185  | 0.715761 | 10.81712 | 0.003476 |                  |                      |
| A_42_P814235  | 0.715392 | 9.823875 | 0.00957  | NM_057124        | P2ry6                |
| A_44_P848951  | 0.708819 | 10.57781 | 0.002262 | AW915522         |                      |
| A_44_P222447  | 0.706019 | 14.60212 | 0.004094 | CF979076         | RGD1560394_predicted |

|               |          |          |          |              |                      |
|---------------|----------|----------|----------|--------------|----------------------|
| A_44_P319238  | 0.705051 | 9.700374 | 0.003076 | XM_345977    | Cpne4_predicted      |
| A_44_P589674  | 0.702823 | 9.794569 | 0.002936 | AI406628     |                      |
| A_44_P394279  | 0.701716 | 14.61949 | 0.008634 | XM_001081777 | RGD1560070_predicted |
| A_43_P19039   | 0.699688 | 11.21215 | 0.001006 | XM_342487    | RGD1560583_predicted |
| A_44_P1014527 | 0.698386 | 11.80935 | 0.007188 | XM_216189    | Alms1_predicted      |
| A_44_P1000100 | 0.69182  | 10.41259 | 0.000131 | XM_215666    | Trim45_predicted     |
| A_44_P117216  | 0.691555 | 9.702736 | 0.004375 | NM_001025007 | RGD1310852           |
| A_44_P559239  | 0.69093  | 8.905563 | 0.004893 | AW921223     |                      |
| A_44_P620208  | 0.688642 | 11.0855  | 0.001347 | BF549419     |                      |
| A_44_P868418  | 0.683253 | 11.31543 | 0.002557 | AI043758     |                      |
| A_44_P748361  | 0.683244 | 9.811364 | 0.009237 |              |                      |
| A_42_P797638  | 0.677852 | 11.19226 | 0.001471 | XM_341839    | Wtip_predicted       |
| A_43_P12401   | 0.677561 | 9.473038 | 0.006205 | NM_024142    | Mepe                 |
| A_42_P596050  | 0.674306 | 9.845698 | 0.004973 | NM_053572    | Pcdh21               |
| A_44_P435158  | 0.674159 | 8.895149 | 0.004429 | AW917664     |                      |
| A_44_P930681  | 0.673171 | 11.51947 | 0.003812 | DV723298     |                      |
| A_44_P882551  | 0.671501 | 11.07155 | 0.007595 | XM_001072622 | RGD1560871_predicted |
| A_42_P782490  | 0.669773 | 9.828156 | 0.005585 | XM_226464    | RGD1560268_predicted |
| A_44_P640931  | 0.668623 | 11.37124 | 0.001121 |              |                      |
| A_44_P1049275 | 0.666814 | 10.60548 | 0.009591 | DQ889715     |                      |
| A_44_P272253  | 0.66654  | 9.507764 | 0.001977 | XM_213864    | LOC288978            |
| A_44_P507773  | 0.661387 | 10.38264 | 0.009943 | BG663014     | RGD1565037_predicted |
| A_44_P971665  | 0.659826 | 11.41268 | 0.003752 | AW916050     |                      |
| A_43_P11476   | 0.656787 | 9.86656  | 0.003993 | NM_012590    | Inha                 |
| A_44_P668572  | 0.65317  | 10.08484 | 0.003757 |              |                      |
| A_44_P900576  | 0.653048 | 9.196065 | 0.006286 |              |                      |
| A_44_P996952  | 0.653002 | 9.262775 | 0.001239 | NM_001039454 | RGD1561028           |
| A_44_P376112  | 0.652891 | 10.44574 | 0.00588  | X72758       |                      |
| A_44_P178503  | 0.652686 | 9.392082 | 0.007859 | XM_221452    |                      |
| A_44_P1034937 | 0.650992 | 12.38865 | 0.006503 | NM_001011966 | Smarcd3              |
| A_44_P296473  | 0.648189 | 8.12823  | 0.003827 | AI013718     |                      |
| A_44_P623694  | 0.648094 | 9.491483 | 0.003318 | XM_001067023 | LOC688455            |
| A_44_P358028  | 0.646793 | 10.30608 | 0.009916 | CO569648     |                      |
| A_44_P179338  | 0.646712 | 8.706902 | 0.007715 | AI603168     | Rps15                |
| A_42_P740209  | 0.643911 | 10.52559 | 0.000482 | NM_012601    | Mpg                  |
| A_44_P669323  | 0.641396 | 9.487703 | 0.003317 |              |                      |
| A_44_P500295  | 0.639834 | 8.53055  | 0.005152 | BI274118     |                      |
| A_42_P619403  | 0.638018 | 10.81318 | 0.00178  | XM_341720    | RGD1309879           |
| A_44_P316898  | 0.636016 | 11.33567 | 0.002103 | XM_213488    | Higd1b_predicted     |
| A_44_P324906  | 0.635202 | 11.11406 | 0.004427 | AW142380     |                      |
| A_43_P11634   | 0.633438 | 9.769668 | 0.004831 | NM_012959    | Gfra1                |
| A_44_P753353  | 0.633317 | 8.537939 | 0.008049 | CO401859     |                      |
| A_44_P464065  | 0.632653 | 9.778917 | 0.008309 | NM_001033687 | Ushbp1               |
| A_44_P729931  | 0.632187 | 10.18263 | 0.001685 | XM_001061367 | LOC682404            |
| A_44_P808566  | 0.631451 | 9.344853 | 0.003337 |              |                      |
| A_43_P11350   | 0.629225 | 9.91316  | 0.006281 | NM_001009271 | Nt5dc2               |
| A_44_P637675  | 0.627415 | 11.75785 | 0.004746 |              |                      |
| A_44_P1024315 | 0.625645 | 10.69359 | 0.006978 | NM_031321    | Slit3                |
| A_42_P560984  | 0.625403 | 13.64446 | 0.000459 | XM_574891    | RGD1565641_predicted |

|               |          |          |          |              |                      |
|---------------|----------|----------|----------|--------------|----------------------|
| A_44_P1048140 | 0.620488 | 10.50182 | 0.000329 | AI072036     |                      |
| A_43_P12205   | 0.619793 | 10.56946 | 0.007281 | NM_022294    | Eltd1                |
| A_42_P558206  | 0.618407 | 11.05513 | 0.005686 | AW144330     |                      |
| A_44_P513232  | 0.618325 | 12.10898 | 0.003182 | BC099181     |                      |
| A_44_P747073  | 0.618093 | 8.869727 | 0.002865 |              |                      |
| A_43_P11654   | 0.616996 | 11.29558 | 0.003532 | NM_013007    | Pnoc                 |
| A_44_P1007449 | 0.6148   | 11.20815 | 0.004405 | XM_222190    | RGD1310159_predicted |
| A_44_P1026706 | 0.612765 | 10.75157 | 0.003673 | XM_001061644 | RGD1560433_predicted |
| A_44_P900390  | 0.611891 | 10.72012 | 0.000772 |              |                      |
| A_42_P735417  | 0.610726 | 9.364027 | 0.003617 | NM_175756    | Fcgr2b               |
| A_44_P284079  | 0.610166 | 8.530775 | 0.005062 |              |                      |
| A_44_P839432  | 0.609938 | 9.475047 | 0.003499 |              |                      |
| A_44_P747182  | 0.60653  | 11.36896 | 0.005169 |              |                      |
| A_44_P376411  | 0.606227 | 13.76028 | 0.001558 | BF548067     |                      |
| A_44_P559242  | 0.605856 | 9.055327 | 0.001664 | XM_001065920 |                      |
| A_42_P694208  | 0.602707 | 9.982905 | 0.00706  | XM_216483    | RGD1311126_predicted |
| A_43_P17094   | 0.602556 | 11.6708  | 0.005941 | XM_575803    | RGD1561916_predicted |
| A_44_P977637  | 0.599374 | 9.003673 | 0.001018 |              |                      |
| A_43_P10036   | 0.598834 | 12.94357 | 0.004326 |              |                      |
| A_43_P11441   | 0.598154 | 9.32848  | 0.006699 | NM_012510    | Atp4b                |
| A_44_P113907  | 0.59688  | 10.14031 | 0.007975 | NM_170787    | Cmbp                 |
| A_42_P620042  | 0.594377 | 11.38184 | 0.009277 | NM_032080    | Gsk3b                |
| A_43_P14264   | 0.593121 | 10.59142 | 0.003642 | NM_053653    | Vegfc                |
| A_44_P311963  | 0.588438 | 10.50042 | 0.001069 | XM_575939    | RGD1560468_predicted |
| A_44_P420046  | 0.586908 | 8.398432 | 0.000493 | NM_021669    | Ghrl                 |
| A_44_P653264  | 0.586072 | 11.61992 | 0.004981 |              |                      |
| A_44_P408050  | 0.585517 | 11.32287 | 0.007527 | XM_343189    | Ckap4_predicted      |
| A_44_P200522  | 0.584708 | 8.435389 | 0.006355 | AI171232     |                      |
| A_44_P404737  | 0.584359 | 8.349892 | 0.006292 | BQ208553     |                      |
| A_44_P1031380 | 0.584111 | 7.921169 | 0.003226 | XM_001077462 |                      |
| A_43_P22042   | 0.583503 | 10.78119 | 0.009341 | NM_001009353 | Pla2g7               |
| A_43_P17061   | 0.582069 | 10.14337 | 0.00096  | XM_223729    | Rnf3_predicted       |
| A_44_P746478  | 0.581686 | 10.85794 | 0.009795 |              |                      |
| A_42_P829349  | 0.580869 | 12.14343 | 0.001062 | XM_223785    | Comtd1_predicted     |
| A_44_P1017035 | 0.580629 | 9.27318  | 0.003502 | NM_019214    | Slc26a4              |
| A_44_P250575  | 0.580384 | 9.39954  | 0.009085 | XM_214236    | Nudt15_predicted     |
| A_43_P13381   | 0.577117 | 10.26594 | 0.001837 | NM_139326    | Pomc                 |
| A_44_P1026631 | 0.577082 | 12.89669 | 0.004254 | XM_573823    | Akap11               |
| A_44_P255837  | 0.576706 | 15.01845 | 0.004168 | XR_007349    | RGD1561996_predicted |
| A_44_P215917  | 0.573202 | 8.78396  | 0.009015 | XM_344018    | RGD1563504_predicted |
| A_44_P686665  | 0.566384 | 9.497307 | 0.007581 |              |                      |
| A_44_P1036170 | 0.565807 | 10.90934 | 0.006795 | XM_220770    | Nle1_predicted       |
| A_44_P434118  | 0.565666 | 8.471229 | 0.007235 | XM_213408    | Rhbdl4_predicted     |
| A_42_P695770  | 0.565462 | 13.0292  | 0.000787 | XM_214288    |                      |
| A_42_P686756  | 0.564589 | 11.6427  | 0.008268 | BC087706     |                      |
| A_42_P781585  | 0.56446  | 10.69382 | 0.006588 | NM_001037554 | Bex4                 |
| A_44_P1027971 | 0.564132 | 10.09748 | 0.002595 | XM_001068081 | LOC688730            |
| A_43_P15659   | 0.563997 | 11.5428  | 0.000662 | XM_342062    |                      |
| A_44_P457599  | 0.563541 | 9.073987 | 0.003797 | NM_053832    | Foxj1                |

|               |          |          |          |              |                      |
|---------------|----------|----------|----------|--------------|----------------------|
| A_43_P17945   | 0.56207  | 9.8905   | 0.006736 | NM_001014006 | F12                  |
| A_43_P18226   | 0.561037 | 9.822439 | 0.009187 | XM_234942    | Myo1f_predicted      |
| A_44_P956958  | 0.560997 | 10.34486 | 0.00161  | AW143890     |                      |
| A_42_P747311  | 0.560893 | 10.13027 | 0.008442 | NM_057204    | Ptpn23               |
| A_44_P533531  | 0.560063 | 7.749707 | 0.003019 | AI406723     |                      |
| A_44_P302265  | 0.558124 | 8.517348 | 0.00574  | XM_001065833 |                      |
| A_44_P1050510 | 0.55727  | 8.275122 | 0.001286 | XM_001075804 | LOC686809            |
| A_44_P302383  | 0.557114 | 15.03616 | 0.006088 | XR_006725    | LOC288777            |
| A_44_P273734  | 0.556905 | 11.77642 | 0.00382  | BC090336     | Man1a_predicted      |
| A_44_P983188  | 0.555079 | 9.746672 | 0.005676 | AA818818     |                      |
| A_44_P128820  | 0.554639 | 9.493733 | 0.000674 |              |                      |
| A_42_P454907  | 0.554121 | 8.79808  | 0.001381 | NM_053644    | Cdh23                |
| A_43_P14870   | 0.553953 | 10.69843 | 0.008927 | NM_001013224 | Nmnat3               |
| A_42_P771373  | 0.553627 | 15.02783 | 0.001801 | NM_012614    | Npy                  |
| A_44_P454065  | 0.552253 | 10.04517 | 0.00631  | NM_019147    | Jag1                 |
| A_44_P527154  | 0.552208 | 10.96466 | 0.002312 | NM_001024282 | RGD1564767_predicted |
| A_42_P550172  | 0.55146  | 10.77524 | 0.008243 | XM_001072438 |                      |
| A_44_P356679  | 0.550647 | 10.6521  | 0.002296 | XM_342932    | Atpbd1b_predicted    |
| A_44_P186883  | 0.550626 | 10.1592  | 0.004351 | NM_173103    | Clcnkb               |
| A_44_P731439  | 0.550347 | 9.554146 | 0.002267 |              |                      |
| A_44_P1020748 | 0.549987 | 11.98345 | 0.002468 | XM_343405    | RGD1309779_predicted |
| A_43_P19791   | 0.549438 | 10.00081 | 0.007721 | XM_343063    |                      |
| A_43_P13996   | 0.548706 | 10.46704 | 0.007236 |              |                      |
| A_42_P515028  | 0.548351 | 8.802646 | 0.007597 | XM_574162    | RGD1564431_predicted |
| A_44_P527089  | 0.5474   | 8.896843 | 0.004266 | M11597       | Calca                |
| A_44_P117015  | 0.546888 | 14.60943 | 0.009864 | XM_342664    | Ndufb2_predicted     |
| A_44_P454847  | 0.546823 | 12.30266 | 0.002103 | XM_342460    | Ptpmt1               |
| A_42_P502768  | 0.543328 | 11.25355 | 0.009264 | XM_001065468 | LOC685841            |
| A_44_P974137  | 0.541887 | 7.395577 | 0.0006   | AI716115     |                      |
| A_44_P354018  | 0.540368 | 13.14388 | 0.00538  | XM_224779    | RGD1559708_predicted |
| A_43_P16588   | 0.540157 | 12.47542 | 0.0032   | XM_342414    | Sh2d3c_predicted     |
| A_44_P993027  | 0.538938 | 11.5777  | 0.00983  | NM_017060    | Hrasls3              |
| A_44_P186860  | 0.537831 | 10.31388 | 0.007414 | NM_030867    | Nfkbib               |
| A_44_P779143  | 0.537821 | 8.487288 | 0.00418  |              |                      |
| A_44_P468661  | 0.536414 | 10.48671 | 0.003267 | XM_001067949 | LOC688966            |
| A_42_P797965  | 0.535476 | 11.00195 | 0.00189  | XM_341902    | RGD1306959_predicted |
| A_44_P728951  | 0.534878 | 15.17816 | 0.006581 | NM_031838    | Rps2                 |
| A_44_P960935  | 0.5334   | 11.41158 | 0.002319 |              |                      |
| A_44_P525649  | 0.533214 | 11.41392 | 0.003291 |              |                      |
| A_44_P1020608 | 0.533079 | 9.273392 | 0.007964 | XM_227821    | Ifi44                |
| A_44_P115509  | 0.532461 | 8.32335  | 0.003018 | CN542475     | Mrpl34               |
| A_44_P901878  | 0.531861 | 8.805109 | 0.001812 |              |                      |
| A_44_P389590  | 0.530125 | 8.795146 | 0.006664 | XM_236348    | Cilp_predicted       |
| A_44_P1034346 | 0.527902 | 15.16222 | 0.002687 | NM_001013922 | RGD1307752           |
| A_44_P996729  | 0.524978 | 9.473439 | 0.003588 | NM_031054    | Mmp2                 |
| A_44_P792646  | 0.524628 | 8.148467 | 0.006338 |              |                      |
| A_44_P187641  | 0.524616 | 10.19557 | 0.009149 | XM_342871    | RGD1307610_predicted |
| A_42_P700089  | 0.52346  | 11.57458 | 0.009959 | NM_001034157 | Bat4                 |
| A_44_P791860  | 0.521772 | 9.427981 | 0.001731 |              |                      |

|               |          |          |          |              |                      |
|---------------|----------|----------|----------|--------------|----------------------|
| A_42_P501233  | 0.521734 | 12.36386 | 0.003728 | NM_024483    | Adra1d               |
| A_44_P592844  | 0.521615 | 9.250689 | 0.000598 |              |                      |
| A_44_P159613  | 0.521193 | 9.600495 | 0.006964 | XM_344763    | RGD1306894_predicted |
| A_43_P14871   | 0.520827 | 9.257777 | 0.002226 | NM_021587    | Ltbp1                |
| A_44_P792446  | 0.520423 | 9.211865 | 0.009129 | XM_235529    | Scube1               |
| A_44_P189859  | 0.517844 | 8.457089 | 0.006586 | NM_001012094 | Zfp297b              |
| A_43_P22700   | 0.517808 | 8.510855 | 0.00613  |              |                      |
| A_42_P578953  | 0.517652 | 9.465361 | 0.009175 | XM_342416    | Ptrh1_predicted      |
| A_44_P210736  | 0.51718  | 10.06647 | 0.009054 | XR_007818    | RGD1563527_predicted |
| A_44_P668620  | 0.516418 | 10.83056 | 0.003444 | XM_340915    | Ccdc43               |
| A_42_P837214  | 0.516128 | 9.812712 | 0.005553 | NM_012861    | Mgmt                 |
| A_44_P164848  | 0.514671 | 10.69432 | 0.007166 | AW142951     |                      |
| A_43_P10498   | 0.514272 | 11.03042 | 0.001276 | XM_237039    |                      |
| A_44_P421333  | 0.513769 | 8.574784 | 0.007005 | NM_080778    | Nr2f2                |
| A_44_P122206  | 0.513365 | 15.15379 | 0.003959 | NM_022541    | Timm8b               |
| A_44_P133485  | 0.512323 | 12.43585 | 0.003145 | XM_342883    | LOC362564            |
| A_44_P337311  | 0.511511 | 7.975955 | 0.001121 | XM_342172    | Thbs4                |
| A_44_P670043  | 0.510834 | 10.45987 | 0.007806 |              |                      |
| A_44_P1026123 | 0.509573 | 12.01201 | 0.008494 | XM_341806    |                      |
| A_44_P978083  | 0.507157 | 10.46215 | 0.00409  |              |                      |
| A_42_P737455  | 0.506634 | 12.01383 | 0.002142 | AI071866     |                      |
| A_44_P607632  | 0.505455 | 10.97934 | 0.004712 | XM_001079243 | LOC691678            |
| A_44_P412236  | 0.505256 | 10.44247 | 0.004168 | NM_053730    | Stag3                |
| A_44_P976153  | 0.504629 | 13.56608 | 0.001759 |              |                      |
| A_44_P853624  | 0.503794 | 10.94544 | 0.003551 | XM_237855    | RGD1308321_predicted |
| A_44_P370645  | 0.503213 | 13.74896 | 0.007767 | XM_216400    | Sec61b_predicted     |
| A_44_P561643  | 0.502716 | 8.03752  | 0.008948 |              |                      |
| A_44_P274083  | 0.502042 | 11.44706 | 0.007485 | NM_173105    | Aqp11                |
| A_44_P263854  | 0.500949 | 7.556899 | 0.002011 | AA819299     |                      |
| A_44_P997787  | 0.499178 | 11.68636 | 0.001984 | XM_213799    | RGD1562579_predicted |
| A_44_P215056  | 0.49916  | 15.24759 | 0.00311  | NM_001007235 | Itpr1                |
| A_42_P621832  | 0.498006 | 13.25698 | 0.002695 | XM_215083    | RGD1306636_predicted |
| A_43_P12437   | 0.496721 | 9.648658 | 0.008789 | NM_024385    | Hhex                 |
| A_44_P513360  | 0.494845 | 8.485518 | 0.000889 | XM_214152    | Cdkn3_predicted      |
| A_43_P14954   | 0.493343 | 11.66088 | 0.004046 | XM_233820    | Sos1                 |
| A_44_P447701  | 0.492105 | 10.46227 | 0.008867 |              |                      |
| A_43_P19306   | 0.491696 | 10.80629 | 0.0087   | XM_223660    | RGD1309501_predicted |
| A_43_P19265   | 0.490977 | 10.98343 | 0.009847 | XM_342507    | RGD1562705_predicted |
| A_44_P330109  | 0.490805 | 10.01774 | 0.00451  | NM_040669    | Hps1                 |
| A_43_P10072   | 0.490183 | 10.93163 | 0.005158 | NM_213564    | Zbtb9                |
| A_44_P241190  | 0.48927  | 10.80101 | 0.003973 | NM_001013199 | Sdccag10             |
| A_42_P601961  | 0.487725 | 10.03823 | 0.00844  | XM_225203    | Susd3_predicted      |
| A_44_P932158  | 0.487385 | 9.506271 | 0.005037 |              |                      |
| A_42_P512838  | 0.487372 | 12.00659 | 0.004471 | XM_217335    | Trem2_predicted      |
| A_44_P562712  | 0.486028 | 9.158063 | 0.005034 |              |                      |
| A_44_P409232  | 0.485898 | 7.385279 | 0.003633 | NM_031543    | Cyp2e1               |
| A_44_P370335  | 0.48549  | 11.42783 | 0.006794 | NM_001011911 | Lyar                 |
| A_44_P597013  | 0.484512 | 9.936548 | 0.002444 |              |                      |
| A_44_P713589  | 0.482311 | 9.954375 | 0.008636 |              |                      |

|               |          |          |          |              |                      |
|---------------|----------|----------|----------|--------------|----------------------|
| A_44_P591963  | 0.481999 | 11.282   | 0.009105 | DV728639     |                      |
| A_44_P822852  | 0.480143 | 13.07186 | 0.008598 | XM_001073919 | LOC686393            |
| A_43_P10505   | 0.479408 | 15.07648 | 0.007169 | XM_226549    | Jph3_predicted       |
| A_44_P428922  | 0.479017 | 10.93142 | 0.009585 | XM_341979    |                      |
| A_42_P824657  | 0.47757  | 10.6343  | 0.002811 | XM_214678    | RGD1307357_predicted |
| A_44_P306626  | 0.476762 | 11.74221 | 0.007671 | XM_577573    |                      |
| A_44_P277669  | 0.47676  | 9.356253 | 0.008363 | XM_573168    | RGD1559961_predicted |
| A_42_P770330  | 0.47665  | 12.22638 | 0.008628 | XM_001062632 | LOC684934            |
| A_44_P125145  | 0.476294 | 9.924844 | 0.006945 | CF109884     |                      |
| A_44_P387314  | 0.476035 | 8.528691 | 0.007087 |              |                      |
| A_42_P738337  | 0.475807 | 13.2805  | 0.005505 | NM_012575    | Grin2c               |
| A_43_P16816   | 0.47557  | 11.83034 | 0.009131 | NM_001044290 | LOC686883            |
| A_44_P1022403 | 0.474294 | 13.72272 | 0.002583 | NM_001004204 | MGC94190             |
| A_42_P506956  | 0.473183 | 10.23541 | 0.006511 | NM_133559    | Pcsk4                |
| A_43_P17196   | 0.473149 | 10.88791 | 0.007969 | XM_576184    | RGD1562114_predicted |
| A_44_P1058112 | 0.473068 | 10.42333 | 0.002332 | NM_001009627 | Yars2                |
| A_44_P578250  | 0.472654 | 10.84042 | 0.007706 | DV714571     |                      |
| A_44_P290327  | 0.471468 | 10.33899 | 0.008942 | NM_001004234 | MGC94881             |
| A_44_P669746  | 0.471266 | 9.35851  | 0.001943 | XM_229131    | Cova1_predicted      |
| A_44_P776556  | 0.470685 | 10.6081  | 0.007348 | XM_342497    | Chac1_predicted      |
| A_44_P239176  | 0.468474 | 12.48785 | 0.009179 | NM_001008380 | RGD1308959           |
| A_43_P14144   | 0.468252 | 12.01082 | 0.002547 | XM_222855    | Umpk_predicted       |
| A_42_P700150  | 0.467273 | 11.80679 | 0.000671 | BP483355     |                      |
| A_44_P240414  | 0.466987 | 11.48117 | 0.005379 | NM_001017537 | Tex261               |
| A_42_P515931  | 0.466948 | 11.1748  | 0.009094 | XM_220256    |                      |
| A_44_P225353  | 0.465362 | 10.46115 | 0.008862 | NM_001009678 | RGD1311458           |
| A_44_P492624  | 0.465045 | 9.667534 | 0.006243 | XM_340867    |                      |
| A_44_P930534  | 0.464955 | 9.366294 | 0.00883  | BC092660     | RGD1563167_predicted |
| A_43_P11236   | 0.463992 | 12.00416 | 0.001889 | NM_053538    | Laptm5               |
| A_44_P281457  | 0.463175 | 15.21279 | 0.006222 | XM_001054883 | LOC679899            |
| A_44_P792746  | 0.462911 | 12.61698 | 0.006308 |              |                      |
| A_43_P10692   | 0.461194 | 10.27534 | 0.009132 |              |                      |
| A_44_P859124  | 0.460771 | 9.379251 | 0.006061 | CB328239     | LOC689165            |
| A_44_P437346  | 0.460583 | 8.365901 | 0.002927 | AW435442     |                      |
| A_44_P368513  | 0.459819 | 9.534264 | 0.003137 | BF282682     |                      |
| A_44_P816687  | 0.457365 | 15.08238 | 0.006713 |              |                      |
| A_44_P1008245 | 0.457175 | 10.86121 | 0.004652 | XM_216310    | Casc1_predicted      |
| A_44_P997737  | 0.457138 | 10.4096  | 0.009265 | AA942848     |                      |
| A_44_P288443  | 0.456325 | 10.61669 | 0.002509 | XM_344542    | Thsd1_predicted      |
| A_44_P472635  | 0.454909 | 7.530146 | 0.002444 | AA900458     |                      |
| A_44_P938669  | 0.454871 | 10.45325 | 0.007816 | BC127463     | Ng3                  |
| A_44_P496788  | 0.454063 | 11.58357 | 0.008877 | NM_001008295 | Fip111               |
| A_42_P459306  | 0.453602 | 15.23919 | 0.009502 | CB314148     | RGD1305687_predicted |
| A_44_P1030801 | 0.453237 | 11.43176 | 0.005632 | NM_031749    | Gcs1                 |
| A_44_P557994  | 0.451938 | 15.05147 | 0.00241  | XR_006555    | LOC298125            |
| A_44_P142472  | 0.451815 | 13.74517 | 0.002097 | XM_214293    | RGD1308064_predicted |
| A_44_P1027866 | 0.45081  | 10.85902 | 0.004562 | NM_001011925 | Nup93                |
| A_44_P292419  | 0.449724 | 7.803599 | 0.006188 | AA944408     |                      |
| A_44_P1045652 | 0.449511 | 10.26325 | 0.009308 | XM_001057185 | LOC680266            |



|               |          |          |          |              |                      |
|---------------|----------|----------|----------|--------------|----------------------|
| A_44_P843798  | 0.448234 | 10.13852 | 0.00458  | AW144049     |                      |
| A_42_P792497  | 0.446787 | 8.957712 | 0.00776  | NM_023025    | Cyp2j4               |
| A_44_P747708  | 0.445849 | 8.532038 | 0.006265 |              |                      |
| A_42_P809733  | 0.445214 | 10.10656 | 0.009371 | XM_347094    | RGD1309410_predicted |
| A_44_P281216  | 0.444489 | 11.03937 | 0.00685  | XM_341975    |                      |
| A_42_P666843  | 0.44252  | 12.14138 | 0.000614 | XM_214296    | Pgls_predicted       |
| A_44_P838483  | 0.439995 | 12.02493 | 0.003033 |              |                      |
| A_44_P980178  | 0.439693 | 9.848248 | 0.007696 |              |                      |
| A_42_P838051  | 0.439586 | 10.38087 | 0.002926 | XM_216446    | Oma1_predicted       |
| A_44_P211997  | 0.436673 | 8.390802 | 0.00677  | BF282863     |                      |
| A_44_P381177  | 0.433194 | 8.439087 | 0.00677  | AA925047     |                      |
| A_44_P1058421 | 0.432785 | 11.85759 | 0.007566 | BC091438     | Phf12                |
| A_44_P884119  | 0.432377 | 11.39608 | 0.007537 | NM_001014061 | LOC312863            |
| A_44_P303883  | 0.431123 | 8.470756 | 0.007266 | AI602844     |                      |
| A_43_P17192   | 0.430405 | 11.86591 | 0.00643  |              |                      |
| A_44_P274785  | 0.427234 | 11.39347 | 0.009019 | XM_213260    | RGD1310922_predicted |
| A_44_P1004260 | 0.426859 | 11.65237 | 0.009919 | XM_231121    | Tmem15_predicted     |
| A_44_P147888  | 0.424227 | 7.149848 | 0.009323 | AA925444     |                      |
| A_43_P11580   | 0.423705 | 9.696657 | 0.007139 | NM_012833    | Abcc2                |
| A_44_P402559  | 0.422607 | 7.597691 | 0.002504 | NM_001000910 | Olr1598_predicted    |
| A_44_P307646  | 0.422312 | 7.041288 | 0.004813 | BI289723     |                      |
| A_44_P591370  | 0.421966 | 13.85891 | 0.006538 |              |                      |
| A_44_P993577  | 0.42188  | 10.7227  | 0.005385 | XM_214633    | RGD1560538_predicted |
| A_44_P710192  | 0.419518 | 7.395678 | 0.007925 | NM_001033067 | Tmem45b              |
| A_44_P251542  | 0.418155 | 7.329535 | 0.00136  | NM_001008864 | Tessp5               |
| A_44_P1045612 | 0.416475 | 9.352711 | 0.005762 | NM_172317    | Fxyd3                |
| A_44_P156317  | 0.413928 | 15.16467 | 0.005538 | NM_138910    | Dad1                 |
| A_42_P705083  | 0.413592 | 9.636382 | 0.00501  | XM_341621    | Il17b                |
| A_44_P638411  | 0.411681 | 8.943508 | 0.009697 |              |                      |
| A_44_P1030648 | 0.41131  | 11.38167 | 0.009437 | XM_001079792 | LOC687694            |
| A_43_P23304   | 0.410921 | 11.02713 | 0.005687 | NM_199397    | Panx1                |
| A_44_P476237  | 0.409138 | 7.158337 | 0.005359 | BF406637     |                      |
| A_44_P822839  | 0.408016 | 12.31907 | 0.007651 |              |                      |
| A_44_P890053  | 0.407782 | 7.351377 | 0.005303 | CA505010     |                      |
| A_44_P899264  | 0.405945 | 11.22946 | 0.007897 |              |                      |
| A_44_P421534  | 0.405341 | 12.30185 | 0.00563  | NM_017196    | Aif1                 |
| A_44_P981783  | 0.402686 | 9.048275 | 0.007562 |              |                      |
| A_44_P558411  | 0.39837  | 12.48958 | 0.005443 | NM_033499    | Scrg1                |
| A_42_P802520  | 0.396592 | 12.61219 | 0.008982 | NM_172063    | Pex14                |
| A_44_P340498  | 0.396466 | 12.96412 | 0.007304 | XM_213445    | RGD1559720_predicted |
| A_44_P1050444 | 0.396311 | 10.22641 | 0.007523 | NM_001007749 | Atp5s                |
| A_44_P229769  | 0.395256 | 15.30845 | 0.006174 | NM_031838    | Rps2                 |
| A_44_P140266  | 0.39507  | 8.238868 | 0.007651 | XM_227523    | Slc22a15_predicted   |
| A_44_P562685  | 0.393179 | 8.369911 | 0.003369 | XM_575917    | RGD1564163_predicted |
| A_44_P810151  | 0.392701 | 11.82465 | 0.003282 |              |                      |
| A_43_P14262   | 0.391785 | 13.5887  | 0.006879 | XM_001057346 | RGD1565310_predicted |
| A_44_P422602  | 0.390835 | 7.556121 | 0.007543 | AI177360     |                      |
| A_44_P667745  | 0.387442 | 13.15201 | 0.007663 | DY311022     |                      |
| A_44_P475617  | 0.386967 | 7.385824 | 0.004279 | XM_238082    | RGD1565487_predicted |

|               |           |          |          |              |                      |
|---------------|-----------|----------|----------|--------------|----------------------|
| A_43_P21364   | 0.383104  | 8.531841 | 0.007566 | XM_343342    | LOC363009            |
| A_44_P399999  | 0.379395  | 15.41955 | 0.009292 | NM_053752    | Suclg1               |
| A_44_P1002320 | 0.378477  | 13.9765  | 0.006397 | BF289377     |                      |
| A_44_P505188  | 0.378105  | 7.591275 | 0.009527 | AI454498     |                      |
| A_44_P378322  | 0.375598  | 9.393646 | 0.00534  | AA858768     |                      |
| A_44_P290016  | 0.375006  | 13.07897 | 0.009351 | BG666843     |                      |
| A_43_P22494   | 0.37441   | 8.369659 | 0.007185 |              |                      |
| A_43_P16530   | 0.374106  | 13.06302 | 0.009245 | XM_213733    | Pop7_predicted       |
| A_44_P1043668 | 0.372798  | 7.238479 | 0.006893 | NM_001014003 | RGD1307172           |
| A_44_P1051894 | 0.368997  | 9.204886 | 0.007275 | XR_009243    | LOC363915            |
| A_44_P1047992 | 0.367006  | 7.214531 | 0.008066 | NM_012803    | Proc                 |
| A_42_P685138  | 0.366955  | 11.97115 | 0.009234 | NM_153621    | Dab1                 |
| A_44_P351239  | 0.366576  | 7.624133 | 0.008737 | NM_001000949 | Olr179_predicted     |
| A_43_P16804   | 0.363022  | 11.4628  | 0.007236 | NM_001007652 | Pole3                |
| A_42_P626023  | 0.358798  | 10.46022 | 0.00991  | XM_224232    | Cenpj_predicted      |
| A_44_P134465  | 0.350702  | 8.410751 | 0.0084   | AA963226     |                      |
| A_44_P257522  | 0.348981  | 8.174514 | 0.007883 | XM_574228    | Agrp                 |
| A_44_P178014  | 0.346895  | 7.08938  | 0.007953 | BC079202     | RGD1560814_predicted |
| A_44_P273515  | 0.339925  | 12.94672 | 0.0055   | DV723169     |                      |
| A_44_P108993  | 0.338519  | 7.542753 | 0.006345 | BF420718     |                      |
| A_43_P14576   | 0.33491   | 13.26406 | 0.006177 |              |                      |
| A_44_P794680  | 0.332151  | 8.579136 | 0.009291 |              |                      |
| A_44_P505488  | 0.329268  | 7.348394 | 0.008895 | BI288152     |                      |
| A_44_P591036  | 0.30765   | 7.029821 | 0.009164 | XM_001069503 | LOC685839            |
| A_44_P388709  | -0.277114 | 7.125181 | 0.00825  | NM_145767    | Prrx1                |
| A_44_P163408  | -0.301364 | 7.336079 | 0.007371 | NM_031798    | Slc12a2              |
| A_44_P370774  | -0.30644  | 7.045656 | 0.009599 | XM_235183    | Irak3_predicted      |
| A_44_P300110  | -0.31546  | 8.120294 | 0.00754  | XM_234335    | Zfyve26_predicted    |
| A_44_P515461  | -0.317648 | 12.48507 | 0.00948  | NM_171990    | Bpnt1                |
| A_44_P228903  | -0.319342 | 7.646097 | 0.005616 | NM_078621    | Ccbp2                |
| A_44_P349720  | -0.326164 | 7.517157 | 0.006523 | NM_001039174 | LOC654482            |
| A_44_P374795  | -0.328038 | 7.277528 | 0.009295 | XM_232197    | Fbln2                |
| A_44_P242252  | -0.328341 | 13.95643 | 0.008558 | NM_031237    | Ube2d3               |
| A_44_P557376  | -0.334624 | 7.479056 | 0.009316 | NM_012546    | Drd1a                |
| A_43_P18979   | -0.337979 | 8.103409 | 0.009229 | XM_340992    | Rabl3_predicted      |
| A_43_P16060   | -0.338348 | 7.375756 | 0.005639 | XM_001065759 | Mitf                 |
| A_44_P332429  | -0.34648  | 8.812568 | 0.004876 | NM_138900    | C1s                  |
| A_44_P274526  | -0.347421 | 7.964663 | 0.002915 | XM_230889    | RGD1311378_predicted |
| A_44_P865552  | -0.352072 | 7.495648 | 0.007668 | AW143038     |                      |
| A_44_P291081  | -0.354249 | 10.2845  | 0.008309 | XM_001054316 | Mon2                 |
| A_44_P372555  | -0.355726 | 10.97908 | 0.008972 | NM_175764    | Jmjd1a               |
| A_44_P604860  | -0.355913 | 8.288109 | 0.008249 | BC098774     |                      |
| A_44_P150432  | -0.356004 | 7.38676  | 0.000845 | D38557       |                      |
| A_43_P15352   | -0.360573 | 7.803403 | 0.006078 | NM_080577    | Nploc4               |
| A_43_P18495   | -0.362158 | 8.081096 | 0.009698 | NM_001011952 | Slc39a8              |
| A_44_P304374  | -0.363852 | 8.110134 | 0.007795 | NM_001012745 | Zfp422_predicted     |
| A_44_P187388  | -0.371358 | 7.568589 | 0.008114 | XR_006961    | LOC295077            |
| A_44_P464428  | -0.371729 | 7.097096 | 0.001069 | XM_343279    | Zfp647_predicted     |
| A_43_P21231   | -0.372047 | 8.054747 | 0.008386 | XM_217594    | Suv39h1_predicted    |

|               |           |          |          |              |                      |
|---------------|-----------|----------|----------|--------------|----------------------|
| A_42_P703664  | -0.372616 | 8.338728 | 0.00858  | CV118897     | Srxn1                |
| A_44_P1010416 | -0.372721 | 8.425505 | 0.002935 | NM_001002853 | P2ry13               |
| A_44_P187524  | -0.376345 | 13.29484 | 0.008423 | XM_214690    | Aars                 |
| A_44_P527635  | -0.377348 | 7.727722 | 0.0087   | NM_001014055 | RGD1309682           |
| A_44_P874814  | -0.377382 | 8.871871 | 0.007677 |              |                      |
| A_44_P437973  | -0.377777 | 7.563555 | 0.005686 | NM_020090    | Slc24a1              |
| A_44_P412418  | -0.37849  | 7.41379  | 0.004835 | XM_001063618 |                      |
| A_43_P17282   | -0.380701 | 7.370769 | 0.004136 | XM_219879    | Cnnm1_predicted      |
| A_44_P180645  | -0.382578 | 7.562432 | 0.006521 | BC098851     | Usp24_predicted      |
| A_44_P333452  | -0.385514 | 7.947414 | 0.004676 | XM_347258    | RGD1563309_predicted |
| A_44_P1000561 | -0.386045 | 8.849037 | 0.007385 | XM_235378    | RGD1305781           |
| A_44_P136911  | -0.386216 | 13.38161 | 0.006216 | BC078917     | Rnpc2                |
| A_43_P16885   | -0.386816 | 8.04462  | 0.007478 | XM_235169    | Mdm2_predicted       |
| A_44_P536125  | -0.388142 | 9.259137 | 0.006564 | NM_053557    | Hrmt1l3              |
| A_44_P656668  | -0.388242 | 7.348888 | 0.009361 | CK476135     |                      |
| A_44_P154721  | -0.389698 | 9.396214 | 0.006498 | XM_220217    | Zfp263_predicted     |
| A_44_P116606  | -0.392618 | 7.486812 | 0.007196 | XM_342337    | Ank2                 |
| A_43_P12267   | -0.392704 | 7.482954 | 0.002535 | NM_022623    | Fzd4                 |
| A_44_P829047  | -0.393483 | 8.964901 | 0.006918 | CO402576     |                      |
| A_44_P541431  | -0.395296 | 8.013577 | 0.009828 | NM_001024246 | RGD1310794           |
| A_44_P925410  | -0.396807 | 9.196403 | 0.00307  | BF386740     |                      |
| A_43_P22351   | -0.398613 | 8.784806 | 0.007162 | NM_001024968 | RGD1307594           |
| A_43_P19646   | -0.399039 | 7.740829 | 0.002969 | XM_341833    |                      |
| A_44_P984158  | -0.40054  | 7.913112 | 0.002939 | BI291259     | LOC691759            |
| A_43_P11729   | -0.401196 | 7.849259 | 0.005334 | NM_013134    | Hmgcr                |
| A_44_P184955  | -0.402159 | 9.922687 | 0.009914 | XM_215006    | RGD1307366_predicted |
| A_44_P374341  | -0.402413 | 11.9804  | 0.009791 | NM_001029897 | Strn3                |
| A_44_P395572  | -0.402616 | 7.391226 | 0.004891 | NM_147210    | Nr1d2                |
| A_43_P18148   | -0.402674 | 8.9781   | 0.008113 | XM_218963    | Arhgef17_predicted   |
| A_44_P333374  | -0.402932 | 7.958977 | 0.004709 | XM_001064905 | RGD1560736_predicted |
| A_44_P998042  | -0.405032 | 7.829167 | 0.005607 | XM_229579    | RGD1309621           |
| A_44_P128986  | -0.406634 | 10.13576 | 0.006003 | NM_001034959 | LOC619574            |
| A_44_P893828  | -0.408401 | 8.447218 | 0.009765 |              |                      |
| A_42_P584710  | -0.409763 | 7.911257 | 0.005578 | XM_213677    |                      |
| A_44_P545649  | -0.411763 | 7.755706 | 0.00159  | NM_001014093 | Parp16               |
| A_44_P147980  | -0.41267  | 8.163945 | 0.004793 | XM_576503    |                      |
| A_44_P126027  | -0.414711 | 8.320375 | 0.002833 | NM_019333    | Pfkfb4               |
| A_44_P149599  | -0.415456 | 8.959757 | 0.008602 | NM_001079705 | RGD1311558_predicted |
| A_43_P22795   | -0.416161 | 8.343222 | 0.009128 | NM_001037204 | Taf1a                |
| A_44_P303716  | -0.417343 | 9.839435 | 0.004084 | XM_345266    | Trim33_predicted     |
| A_44_P100609  | -0.418309 | 11.7365  | 0.008571 | XM_001064153 |                      |
| A_44_P655158  | -0.418598 | 10.96723 | 0.00669  | CO567276     |                      |
| A_44_P337579  | -0.41874  | 7.77436  | 0.007229 | NM_001008346 | RGD1308302           |
| A_43_P16847   | -0.419123 | 7.615653 | 0.004217 | XM_233686    | Spsb1_predicted      |
| A_44_P523190  | -0.420052 | 7.857785 | 0.004025 | XM_343095    | RGD1311756_predicted |
| A_44_P683082  | -0.422342 | 8.705595 | 0.008957 |              |                      |
| A_44_P473314  | -0.424177 | 7.958854 | 0.0092   | NM_001013997 | RGD1309522           |
| A_44_P729266  | -0.425062 | 7.240329 | 0.00491  | XR_005718    | LOC300506            |
| A_44_P357870  | -0.425064 | 10.4228  | 0.00681  | NM_031559    | Cpt1a                |

|               |           |          |          |              |                      |
|---------------|-----------|----------|----------|--------------|----------------------|
| A_43_P15840   | -0.425124 | 8.202072 | 0.006167 | XM_221874    |                      |
| A_44_P166464  | -0.425388 | 7.355895 | 0.005999 | XM_235050    | Scyl2_predicted      |
| A_43_P15468   | -0.426087 | 7.748036 | 0.004805 | NM_012585    | Htr1a                |
| A_44_P549198  | -0.426763 | 7.242243 | 0.007579 | XM_224165    | Ift88_predicted      |
| A_44_P520700  | -0.426846 | 10.3449  | 0.007187 | XM_341377    | RGD1561742_predicted |
| A_44_P986848  | -0.427928 | 13.98555 | 0.004016 | XM_341882    | Sytl2_predicted      |
| A_44_P206258  | -0.430841 | 10.53316 | 0.008065 | NM_001034146 | Usp10                |
| A_44_P123813  | -0.43159  | 7.738666 | 0.005008 | XM_223597    | Cobl_predicted       |
| A_44_P258277  | -0.432043 | 11.92776 | 0.007726 | NM_001008507 | Dhrs7b               |
| A_44_P304493  | -0.432466 | 8.166562 | 0.00398  | NM_001024970 | RGD1305572           |
| A_44_P668388  | -0.433567 | 12.07127 | 0.009722 | BC098022     | RGD1561494_predicted |
| A_44_P1004392 | -0.435274 | 12.93181 | 0.003053 | XM_221455    | LOC288109            |
| A_44_P328654  | -0.436421 | 11.70857 | 0.007688 | XM_576882    | LOC501474            |
| A_43_P19234   | -0.437806 | 11.46931 | 0.009135 | NM_001034926 | LOC310946            |
| A_44_P1026191 | -0.438058 | 10.88975 | 0.004056 | NM_001039338 | LOC362156            |
| A_44_P116809  | -0.439177 | 7.470634 | 0.000991 | NM_001014136 | Ngly1                |
| A_44_P501242  | -0.439216 | 8.149434 | 0.006859 | XM_215947    | Ncoa3                |
| A_44_P327515  | -0.440596 | 8.048777 | 0.003946 | XM_001060307 | LOC501515            |
| A_44_P206154  | -0.4407   | 7.880564 | 0.005502 | XM_345231    | RGD1307244_predicted |
| A_43_P10608   | -0.442394 | 12.19876 | 0.002867 | XR_006750    | RGD1310444_predicted |
| A_44_P188869  | -0.443051 | 7.32103  | 0.003535 | AW915311     |                      |
| A_44_P333550  | -0.443265 | 7.827262 | 0.002488 | NM_001013986 | LOC305076            |
| A_44_P360563  | -0.443912 | 7.683515 | 0.003859 | NM_017012    | Grm5                 |
| A_44_P456747  | -0.445211 | 8.694571 | 0.00459  | AB012231     | Nfib                 |
| A_43_P12243   | -0.445373 | 13.92915 | 0.006547 | NM_022540    | Prdx3                |
| A_44_P134186  | -0.445505 | 12.47747 | 0.00625  | NM_145678    | Vps4a                |
| A_44_P377722  | -0.446034 | 12.68135 | 0.009816 | NM_001007651 | Peflin               |
| A_44_P183227  | -0.446446 | 9.436279 | 0.008026 | CO394022     |                      |
| A_44_P545867  | -0.446549 | 8.205647 | 0.001163 | XM_222229    | RGD1309359_predicted |
| A_42_P574960  | -0.447813 | 11.39518 | 0.001401 | XR_009643    |                      |
| A_44_P682849  | -0.448246 | 8.37393  | 0.00533  | XM_001081465 | Rundc1_predicted     |
| A_44_P462285  | -0.450382 | 7.83441  | 0.00322  | XM_342391    | Inpp5e               |
| A_44_P170864  | -0.450423 | 10.55487 | 0.006427 | XM_223651    | RGD1311920_predicted |
| A_44_P729342  | -0.451904 | 12.94046 | 0.007958 | XR_009643    |                      |
| A_44_P124027  | -0.452323 | 8.094798 | 0.001562 | XM_226458    | RGD1309394_predicted |
| A_44_P193644  | -0.452453 | 9.664843 | 0.00925  | XM_001062296 | RGD1561065_predicted |
| A_44_P466608  | -0.454116 | 10.16095 | 0.008012 | XM_238380    | Usp5_predicted       |
| A_43_P22288   | -0.45513  | 8.782478 | 0.008509 | XM_001068814 |                      |
| A_44_P437721  | -0.455167 | 9.310782 | 0.004106 | CO566833     |                      |
| A_44_P449819  | -0.455646 | 8.385985 | 0.006492 | NM_053851    | Cacnb2               |
| A_44_P443493  | -0.45642  | 9.271581 | 0.007848 | NM_001025754 | Neil1                |
| A_43_P17816   | -0.456669 | 9.180063 | 0.00936  | NM_199120    | Cdv1                 |
| A_44_P544297  | -0.457127 | 7.92615  | 0.004401 | NM_001009661 | Wbp11                |
| A_44_P114184  | -0.457582 | 10.4511  | 0.009192 | NM_022543    | Ssg1                 |
| A_44_P485592  | -0.457681 | 12.21972 | 0.009729 | XM_217388    | Mrps9                |
| A_44_P257832  | -0.458486 | 8.387939 | 0.007793 | XM_224535    | Farp1_predicted      |
| A_44_P174982  | -0.458794 | 10.12484 | 0.004693 | NM_022601    | Pnpo                 |
| A_43_P10332   | -0.460476 | 7.918233 | 0.004285 | XR_009629    |                      |
| A_44_P759334  | -0.461876 | 12.22712 | 0.009711 | NM_001011914 | Dr1                  |

|               |           |          |          |              |                      |
|---------------|-----------|----------|----------|--------------|----------------------|
| A_44_P424069  | -0.463971 | 7.490027 | 0.001269 | XM_218463    | Zfp84_predicted      |
| A_44_P324034  | -0.465472 | 8.71878  | 0.006468 | XM_235942    | RGD1308472_predicted |
| A_43_P19519   | -0.465646 | 8.376732 | 0.001694 | XM_223781    | Vcl_predicted        |
| A_43_P22080   | -0.465665 | 8.304411 | 0.004401 | NM_001012044 | Lcp1                 |
| A_43_P15916   | -0.465861 | 8.580545 | 0.006233 | XM_342491    |                      |
| A_44_P249717  | -0.465922 | 7.787938 | 0.004592 | AW144114     |                      |
| A_43_P10414   | -0.466482 | 9.127477 | 0.001963 | NM_001017445 | Ubx8                 |
| A_44_P515792  | -0.466818 | 8.010703 | 0.008513 | XM_341532    | Elmo1_predicted      |
| A_44_P260475  | -0.467015 | 10.55382 | 0.007242 | XM_238362    | Hdac11_predicted     |
| A_44_P492629  | -0.469771 | 11.97851 | 0.009798 | DV727624     | LOC497975            |
| A_44_P412710  | -0.469921 | 10.97259 | 0.005681 | NM_001025423 | Adhfe1               |
| A_44_P211111  | -0.470244 | 8.929899 | 0.007857 | XM_236367    | RGD1565416_predicted |
| A_44_P445521  | -0.470433 | 13.10279 | 0.000946 | XM_226843    | Rnasen               |
| A_44_P267501  | -0.47192  | 7.687429 | 0.007344 | NM_001017448 | RGD1311358           |
| A_44_P520557  | -0.472441 | 9.851848 | 0.009165 | XM_230284    | Arhgap1_predicted    |
| A_43_P21150   | -0.472475 | 9.124359 | 0.007372 | XM_345825    | Tbc1d15              |
| A_44_P484877  | -0.472528 | 11.40675 | 0.009604 | AF475093     |                      |
| A_44_P283772  | -0.47292  | 8.297396 | 0.005855 | XM_573876    | RGD1561342_predicted |
| A_44_P345136  | -0.473156 | 8.837558 | 0.00698  | XM_340879    | Spag9_predicted      |
| A_44_P625829  | -0.474148 | 8.485355 | 0.009303 |              |                      |
| A_44_P427067  | -0.474709 | 11.6164  | 0.0082   | XM_001076752 |                      |
| A_43_P13424   | -0.474807 | 9.092693 | 0.004906 | NM_173290    | Yy1                  |
| A_44_P231655  | -0.476392 | 7.596331 | 0.007901 | XM_222147    | Glt1d1_predicted     |
| A_44_P414704  | -0.47772  | 8.234356 | 0.008052 |              |                      |
| A_44_P397851  | -0.477779 | 9.15503  | 0.007182 | NM_053518    | Lyst                 |
| A_44_P730048  | -0.477978 | 10.56896 | 0.008411 |              |                      |
| A_43_P21938   | -0.478192 | 8.638288 | 0.008101 | XM_220541    | Ulk2_predicted       |
| A_44_P381842  | -0.479346 | 8.259924 | 0.009669 | XM_343640    | Ptpm                 |
| A_44_P1058502 | -0.479398 | 8.486831 | 0.004314 | XM_238162    | Ppfia1_predicted     |
| A_44_P463973  | -0.479937 | 10.936   | 0.006261 | NM_001079889 | Sephs2               |
| A_44_P126498  | -0.479954 | 8.848829 | 0.009172 | XM_234272    | Klhdc1_predicted     |
| A_43_P15409   | -0.480053 | 8.148761 | 0.006225 | NM_023971    | Drp2                 |
| A_44_P384833  | -0.480229 | 7.833966 | 0.007021 | XM_343166    | Mum1_predicted       |
| A_44_P324124  | -0.480593 | 10.55514 | 0.009972 | XM_220595    | RGD1563106_predicted |
| A_44_P350098  | -0.480639 | 8.884507 | 0.006151 | XM_345938    | Alg9_predicted       |
| A_44_P107177  | -0.481244 | 7.566365 | 0.008674 | NM_017018    | Hrh1                 |
| A_42_P645142  | -0.483451 | 11.32202 | 0.008261 | NM_019375    | Sep.03               |
| A_44_P356445  | -0.483861 | 7.658623 | 0.002629 | XM_227547    | Lrig2_predicted      |
| A_44_P376905  | -0.484469 | 12.72706 | 0.003147 | XM_214994    | Spcs2_predicted      |
| A_44_P532020  | -0.484935 | 8.716298 | 0.008881 | XM_219414    | RGD1306820_predicted |
| A_44_P501220  | -0.485339 | 7.802926 | 0.003192 | NM_053951    | Mcf2l                |
| A_44_P331109  | -0.485528 | 8.957026 | 0.006251 | XM_220175    |                      |
| A_44_P105229  | -0.485553 | 10.16727 | 0.004021 | NM_001013157 | Nnt                  |
| A_44_P664802  | -0.485909 | 12.15639 | 0.007649 | DV728182     |                      |
| A_44_P136845  | -0.486006 | 12.40366 | 0.00595  | XM_340879    | Spag9_predicted      |
| A_44_P397495  | -0.487804 | 12.14965 | 0.00402  | NM_024359    | Hif1a                |
| A_44_P311955  | -0.488411 | 8.390355 | 0.004453 | NM_017171    | Prkce                |
| A_42_P765031  | -0.48852  | 8.84223  | 0.007803 | XM_346083    |                      |
| A_44_P480830  | -0.489345 | 8.330588 | 0.005378 | NM_001079943 | Zfp426               |

|               |           |          |          |              |                      |
|---------------|-----------|----------|----------|--------------|----------------------|
| A_44_P661516  | -0.490505 | 7.975856 | 0.002516 |              |                      |
| A_43_P18324   | -0.490957 | 7.896779 | 0.0057   | NM_207165    | Arl10                |
| A_44_P215931  | -0.491066 | 7.225432 | 0.004447 | AI232088     |                      |
| A_44_P501992  | -0.491468 | 12.71414 | 0.003475 | BC071175     | Ero1l                |
| A_44_P693682  | -0.49161  | 10.28309 | 0.008944 |              |                      |
| A_43_P12802   | -0.491629 | 12.46216 | 0.002589 | NM_053418    | Ufd1l                |
| A_43_P18343   | -0.492117 | 10.27197 | 0.005068 | XM_001072617 | Gga2                 |
| A_44_P299123  | -0.492405 | 7.997765 | 0.003786 | XM_215847    | Nphp1_predicted      |
| A_44_P301512  | -0.492541 | 11.62567 | 0.003021 | NM_176077    | G6pc3                |
| A_42_P612592  | -0.495016 | 7.834775 | 0.002747 | XM_001067905 | Saps3_predicted      |
| A_44_P583834  | -0.495725 | 11.18116 | 0.005538 | XM_223597    | Cobl_predicted       |
| A_44_P534113  | -0.496145 | 8.15518  | 0.008216 | NM_053866    | Plaa                 |
| A_44_P409977  | -0.496805 | 8.586221 | 0.003235 | NM_001012742 | Wee1                 |
| A_44_P403816  | -0.497337 | 10.19456 | 0.002825 | AW142588     |                      |
| A_44_P1057763 | -0.497353 | 14.89762 | 0.00726  | NM_053576    | Prdx6                |
| A_44_P768438  | -0.498157 | 15.05002 | 0.00177  | XM_225314    | Vmp_predicted        |
| A_44_P539167  | -0.498327 | 7.569368 | 0.001016 | XR_009059    | LOC317276            |
| A_44_P729229  | -0.498505 | 8.042134 | 0.00752  | XR_009322    | LOC366863            |
| A_44_P210753  | -0.499432 | 9.573971 | 0.006112 | M22631       | Pcca                 |
| A_44_P935947  | -0.499675 | 9.102805 | 0.004718 | XM_342684    | Hnrpa2b1_predicted   |
| A_44_P303044  | -0.499955 | 8.694465 | 0.006585 | XM_239258    | Supt6h               |
| A_44_P555760  | -0.50031  | 7.670131 | 0.002044 | XM_001064688 | LOC257646            |
| A_44_P286467  | -0.50037  | 9.413313 | 0.009875 | XM_237056    | RGD1309266_predicted |
| A_44_P388973  | -0.501101 | 14.59061 | 0.004797 | NM_012571    | Got1                 |
| A_44_P123102  | -0.501148 | 8.015902 | 0.00321  | NM_001039607 | LOC294154            |
| A_44_P293438  | -0.502716 | 12.33671 | 0.00823  | XM_340949    | RGD1311925_predicted |
| A_44_P993382  | -0.503389 | 10.06768 | 0.009282 | NM_031121    | Ssrp1                |
| A_44_P351490  | -0.504828 | 10.77395 | 0.000536 | NM_031797    | Cd82                 |
| A_44_P370213  | -0.505052 | 14.71043 | 0.007415 | NM_012749    | Ncl                  |
| A_43_P16583   | -0.505052 | 11.68119 | 0.002588 | XM_214539    | Snx2_predicted       |
| A_44_P400520  | -0.505512 | 11.05271 | 0.004681 | NM_012866    | Nfyc                 |
| A_44_P133464  | -0.511164 | 8.223828 | 0.008518 |              |                      |
| A_43_P23298   | -0.511238 | 8.463371 | 0.000938 | XM_001079737 | RGD1311730_predicted |
| A_44_P281750  | -0.511574 | 12.76908 | 0.004393 | XM_237790    | Poldip2_predicted    |
| A_44_P533572  | -0.511838 | 8.138074 | 0.003513 | AI639343     |                      |
| A_44_P292900  | -0.512225 | 7.828978 | 0.007812 | XM_219377    | LOC309016            |
| A_44_P340180  | -0.51227  | 9.585392 | 0.00796  | XM_341668    | Anapc10_predicted    |
| A_44_P1048296 | -0.512554 | 13.82163 | 0.005698 | NM_172023    | Osbpl1a              |
| A_44_P238019  | -0.513936 | 9.708293 | 0.005888 | AW143671     |                      |
| A_43_P21191   | -0.513978 | 8.21006  | 0.001345 | XM_234988    | Btbd11_predicted     |
| A_44_P1034030 | -0.514586 | 8.979437 | 0.008022 | XM_220420    | Aff4_predicted       |
| A_44_P290424  | -0.51475  | 10.67252 | 0.004908 | NM_080905    | Siah1a               |
| A_44_P461678  | -0.515057 | 8.811745 | 0.002391 | XM_574677    | RGD1564887_predicted |
| A_44_P363522  | -0.515107 | 10.42892 | 0.005067 | NM_001031661 | B4galt7              |
| A_43_P23210   | -0.515252 | 11.99024 | 0.00817  | NM_001012153 | Fmip                 |
| A_44_P477633  | -0.516537 | 9.815629 | 0.007468 | NM_174864    | Ncstn                |
| A_44_P226906  | -0.517049 | 7.231693 | 0.004884 | NM_147205    | St6gal1              |
| A_44_P540279  | -0.517501 | 11.62786 | 0.00369  | AW144704     |                      |
| A_44_P377698  | -0.518017 | 8.032468 | 0.004629 | XR_006438    | LOC303083            |

|              |           |          |          |              |                      |
|--------------|-----------|----------|----------|--------------|----------------------|
| A_44_P157009 | -0.518179 | 7.915851 | 0.008623 | XM_232995    | Rnf20_predicted      |
| A_44_P445369 | -0.518198 | 8.410379 | 0.005173 | XM_001080476 | LOC360824            |
| A_44_P520929 | -0.518333 | 8.270723 | 0.001288 | NM_001007675 | C1qtnf1              |
| A_44_P208566 | -0.520218 | 8.194993 | 0.000909 | XM_341567    | Plxdc2_predicted     |
| A_44_P301875 | -0.521017 | 8.537786 | 0.005085 | XM_343761    | Wdr44                |
| A_43_P10744  | -0.521209 | 11.8158  | 0.00767  | NM_001014212 | RGD1309784           |
| A_43_P16724  | -0.521403 | 8.927668 | 0.008353 | NM_001014188 | RGD1307688           |
| A_44_P974892 | -0.521521 | 8.218009 | 0.000906 |              | RGD1560103_predicted |
| A_43_P18451  | -0.521667 | 10.50442 | 0.007196 | NM_080579    | Gpr19                |
| A_44_P342730 | -0.521799 | 9.506206 | 0.005248 | NM_001012275 | Arih2_predicted      |
| A_44_P362498 | -0.523592 | 9.057442 | 0.008193 | AW143788     |                      |
| A_44_P255678 | -0.523681 | 10.04796 | 0.004349 | XM_228777    | RGD1564628_predicted |
| A_43_P13675  | -0.524202 | 9.004544 | 0.003831 | CO570281     |                      |
| A_44_P150877 | -0.525453 | 9.650493 | 0.008311 | XM_001080836 | RGD1560454_predicted |
| A_44_P109834 | -0.526057 | 7.550092 | 0.000686 | XM_341783    | Rdh13_predicted      |
| A_42_P644929 | -0.527818 | 13.23495 | 0.009106 | NM_021579    | Nxf1                 |
| A_44_P171155 | -0.527957 | 12.38644 | 0.002943 | NM_001014221 | LOC363337            |
| A_44_P142843 | -0.528222 | 8.161509 | 0.003931 | XM_001065442 | LOC685834            |
| A_43_P17871  | -0.529071 | 9.583896 | 0.008044 | NM_001013186 | Bin3                 |
| A_44_P940553 | -0.529771 | 14.44724 | 0.005633 | AW143148     |                      |
| A_43_P21003  | -0.529928 | 10.93669 | 0.009913 | NM_001033892 | RGD1306841           |
| A_44_P651694 | -0.530167 | 7.349954 | 0.003359 |              |                      |
| A_44_P776937 | -0.530279 | 8.932346 | 0.00542  | CR754170     |                      |
| A_44_P227201 | -0.530711 | 8.205059 | 0.002803 | XM_225013    | Tubgcp3              |
| A_43_P10797  | -0.532261 | 13.40048 | 0.001705 | BG666794     |                      |
| A_44_P471691 | -0.532338 | 8.448807 | 0.000262 | XM_223781    | Vcl_predicted        |
| A_44_P378225 | -0.532628 | 11.11796 | 0.003763 | NM_001011993 | Pycl                 |
| A_44_P315714 | -0.535232 | 9.634824 | 0.009022 | NM_021577    | Asl                  |
| A_44_P683068 | -0.535246 | 8.540939 | 0.005211 | NM_017032    | Pde4d                |
| A_44_P260055 | -0.53652  | 10.82252 | 0.004399 | NM_031043    | Gyg1                 |
| A_42_P750029 | -0.537118 | 10.17965 | 0.001934 | BF559198     |                      |
| A_44_P490460 | -0.537239 | 8.583732 | 0.001709 | XM_224518    | Tgds_predicted       |
| A_44_P230960 | -0.5381   | 12.36711 | 0.005794 | AW144271     |                      |
| A_44_P415459 | -0.538541 | 9.588119 | 0.007499 | CB547990     |                      |
| A_44_P228874 | -0.538818 | 9.251096 | 0.007028 | NM_012815    | Gclc                 |
| A_44_P516073 | -0.539135 | 9.313478 | 0.001599 | XM_217194    | RGD1310552_predicted |
| A_44_P223808 | -0.540022 | 11.92907 | 0.003404 | XM_225711    |                      |
| A_44_P170338 | -0.540274 | 7.955337 | 0.009628 | NM_001002815 | Ece2                 |
| A_44_P485614 | -0.540413 | 8.787416 | 0.00262  |              |                      |
| A_44_P241371 | -0.54044  | 9.019803 | 0.007357 | NM_001013161 | Cstf1                |
| A_44_P175543 | -0.541018 | 8.534275 | 0.005918 | NM_001033699 | Cox15                |
| A_44_P579630 | -0.541041 | 9.037196 | 0.009716 |              |                      |
| A_44_P515211 | -0.541293 | 9.195753 | 0.005306 | NM_145765    | Tnfsf15              |
| A_44_P466183 | -0.541305 | 8.38538  | 0.006606 | NM_133410    | Rap2b                |
| A_44_P168778 | -0.541812 | 8.029785 | 0.008427 | XM_233220    | LOC313391            |
| A_44_P201601 | -0.542679 | 9.320256 | 0.006957 | XM_216096    |                      |
| A_44_P180080 | -0.54313  | 13.22102 | 0.002966 | NM_022867    | Map1lc3b             |
| A_44_P353927 | -0.543168 | 8.204865 | 0.002782 | XM_341931    | RGD1564195_predicted |
| A_44_P344340 | -0.543214 | 8.425997 | 0.006536 | U78135       | Zfoc1                |

|               |           |          |          |              |                      |
|---------------|-----------|----------|----------|--------------|----------------------|
| A_44_P310949  | -0.543425 | 11.20006 | 0.004972 | NM_001004283 | Eif3s7               |
| A_43_P12473   | -0.543679 | 8.782044 | 0.000727 | NM_031006    | Adar                 |
| A_44_P207215  | -0.543992 | 8.44599  | 0.001323 | XM_237115    | Nck2_predicted       |
| A_44_P281155  | -0.544066 | 7.616002 | 0.008359 | XM_341127    | Nek7_predicted       |
| A_44_P323729  | -0.544773 | 7.638288 | 0.004219 | NM_001042621 | Pip5k1a_predicted    |
| A_43_P10248   | -0.544913 | 13.09991 | 0.007402 | NM_001014117 | Ublcp1               |
| A_44_P147622  | -0.545175 | 10.55648 | 0.001064 | XM_343462    | Dnajc13_predicted    |
| A_44_P386375  | -0.545382 | 10.05504 | 0.004797 | NM_053842    | Mapk1                |
| A_44_P333232  | -0.545453 | 7.603713 | 0.001496 | XM_342803    |                      |
| A_44_P265326  | -0.545734 | 8.11399  | 0.003644 | BC087674     | Pus3_predicted       |
| A_43_P19260   | -0.546023 | 9.074997 | 0.004115 | XM_001053368 | RGD1559803_predicted |
| A_44_P525101  | -0.546161 | 7.790761 | 0.001773 | XR_006056    |                      |
| A_44_P534508  | -0.546585 | 8.026102 | 0.003988 | XM_231749    | Zfp212               |
| A_44_P447514  | -0.546908 | 9.609403 | 0.003516 | NM_017155    | Adora1               |
| A_44_P493688  | -0.547009 | 12.20581 | 0.001709 | NM_001008371 | RGD1309216           |
| A_44_P587322  | -0.547841 | 13.30776 | 0.002382 | AW917250     |                      |
| A_43_P15866   | -0.548306 | 9.016571 | 0.002132 | XM_341686    | Ap1g1                |
| A_43_P21374   | -0.548726 | 8.795816 | 0.003865 | NM_001008353 | Mkks                 |
| A_44_P557474  | -0.549682 | 9.075636 | 0.006461 | NM_053742    | Pitpnb               |
| A_44_P191022  | -0.549841 | 11.25682 | 0.006775 | NM_053674    | Phyh                 |
| A_44_P338068  | -0.550111 | 9.971705 | 0.002162 | NM_001024355 | LOC500909            |
| A_44_P331003  | -0.551713 | 8.367306 | 0.002003 | XM_234281    |                      |
| A_44_P222603  | -0.551891 | 8.122971 | 0.004433 | XM_341580    |                      |
| A_44_P995544  | -0.552105 | 10.31184 | 0.006155 | NM_001039034 | Wdr5                 |
| A_44_P241781  | -0.552115 | 9.261364 | 0.004623 | BF558420     |                      |
| A_44_P228715  | -0.552514 | 9.397023 | 0.000278 | NM_019275    | Smad4                |
| A_44_P803129  | -0.552556 | 8.623957 | 0.002243 | AW918772     |                      |
| A_44_P352104  | -0.552676 | 11.45537 | 0.00664  | XM_216993    | Slc25a17_predicted   |
| A_44_P168083  | -0.553081 | 12.95714 | 0.005519 | NM_019381    | Tegt                 |
| A_44_P443228  | -0.554142 | 10.05594 | 0.005989 | XM_341622    | Fech_predicted       |
| A_43_P21031   | -0.554515 | 8.256688 | 0.002089 | XM_232343    | Pex5_predicted       |
| A_44_P171128  | -0.55544  | 10.96284 | 0.00987  | XM_232987    | Alg2                 |
| A_44_P160550  | -0.555742 | 12.55467 | 0.008317 | NM_017116    | Capn2                |
| A_44_P349689  | -0.555915 | 13.50737 | 0.009107 | NM_001009831 | Spg3a                |
| A_44_P550670  | -0.556316 | 11.92568 | 0.005809 | XM_223611    | Tmed4_predicted      |
| A_44_P454426  | -0.556338 | 8.18265  | 0.002798 | AF133906     |                      |
| A_43_P15280   | -0.556496 | 8.112504 | 0.001725 | NM_019194    | Tef                  |
| A_43_P21715   | -0.557461 | 8.881928 | 0.008605 | BC091390     | RGD1305062           |
| A_44_P147582  | -0.558181 | 7.806964 | 0.004217 | NM_001079936 | Rab5b_predicted      |
| A_44_P173345  | -0.558596 | 7.899522 | 0.002954 | XM_342595    | Stx16_predicted      |
| A_44_P381483  | -0.558686 | 11.69825 | 0.003748 | XM_213930    |                      |
| A_44_P167403  | -0.558725 | 9.628788 | 0.006902 | AA875633     |                      |
| A_44_P191924  | -0.559349 | 10.83352 | 0.006013 | NM_019906    | Frap1                |
| A_43_P20321   | -0.559792 | 8.491448 | 0.000581 | XM_228770    | Ccdc22_predicted     |
| A_44_P744309  | -0.560586 | 10.48679 | 0.005371 | XM_222534    | LOC683847            |
| A_44_P289630  | -0.562386 | 13.30648 | 0.005131 | NM_017261    | Gria2                |
| A_44_P1019326 | -0.562708 | 14.64606 | 0.007105 | NM_199372    | Eif4a1               |
| A_44_P292479  | -0.563031 | 12.45133 | 0.007171 | NM_053880    | Dncic2               |
| A_44_P146833  | -0.563782 | 11.62293 | 0.007793 | M92076       | Grm3                 |



|               |           |          |          |              |                      |
|---------------|-----------|----------|----------|--------------|----------------------|
| A_44_P284462  | -0.563948 | 12.82861 | 0.003027 | NM_031728    | Snap91               |
| A_44_P529934  | -0.56395  | 8.644282 | 0.007049 | XM_225661    | RGD1566269_predicted |
| A_43_P16274   | -0.564297 | 11.44811 | 0.004857 | S53987       | Chrna7               |
| A_43_P16927   | -0.564312 | 8.495799 | 0.003682 | XM_228073    | Pofut2_predicted     |
| A_43_P19892   | -0.564842 | 10.33035 | 0.004367 | NM_001014255 | Aph1a                |
| A_44_P147062  | -0.564927 | 9.477962 | 0.008194 | XM_220095    | Moxd1                |
| A_42_P627394  | -0.564957 | 13.05839 | 0.000589 | BC089998     |                      |
| A_44_P299699  | -0.565034 | 9.391809 | 0.005983 | NM_001013896 | RGD1309948           |
| A_44_P309513  | -0.566123 | 8.088215 | 0.003308 | NM_001024367 | LOC501619            |
| A_44_P207634  | -0.566195 | 14.25058 | 0.008942 | NM_001014148 | LOC361309            |
| A_44_P618177  | -0.566587 | 12.8748  | 0.003863 | CF110664     |                      |
| A_44_P156805  | -0.566739 | 8.099318 | 0.008471 | XM_227475    | Pogz_predicted       |
| A_44_P280759  | -0.568056 | 14.37983 | 0.007818 | NM_012992    | Npm1                 |
| A_44_P212355  | -0.56835  | 9.738948 | 0.002238 | XM_232466    | Lrp6_predicted       |
| A_44_P468544  | -0.568435 | 9.993473 | 0.004454 | NM_001013126 | Cyb5r1               |
| A_44_P738643  | -0.568634 | 9.591004 | 0.003566 |              |                      |
| A_44_P348973  | -0.568895 | 8.505955 | 0.006712 | NM_001004277 | Lypla3               |
| A_44_P261883  | -0.569063 | 11.145   | 0.008299 | NM_134402    | Bzw2                 |
| A_44_P650648  | -0.570226 | 10.93273 | 0.000434 | BF561546     |                      |
| A_44_P1060064 | -0.570935 | 9.82548  | 0.005238 | NM_001024883 | RGD1310810           |
| A_44_P409866  | -0.572035 | 8.822675 | 0.003034 | NM_013221    | Hbp1                 |
| A_44_P347771  | -0.572246 | 12.42882 | 0.002978 | CB579735     |                      |
| A_44_P384688  | -0.572632 | 13.66295 | 0.002533 |              |                      |
| A_44_P356027  | -0.572935 | 12.00952 | 0.008344 | NM_053642    | Sc5d                 |
| A_44_P249606  | -0.573078 | 7.971547 | 0.008649 | NM_001025718 | MGC112830            |
| A_43_P15129   | -0.573778 | 7.558528 | 0.000289 | BF558849     |                      |
| A_44_P137356  | -0.574199 | 13.12717 | 0.009568 | NM_053523    | Herpud1              |
| A_44_P550497  | -0.57495  | 8.939273 | 0.002301 | NM_022684    | Bid                  |
| A_44_P365765  | -0.575656 | 8.050544 | 0.005348 | XM_224579    | Simap_predicted      |
| A_44_P190115  | -0.576073 | 9.257267 | 0.002651 | XM_235940    | Snx19_predicted      |
| A_43_P19005   | -0.576291 | 8.928856 | 0.008555 | XM_574285    | RGD1566426_predicted |
| A_44_P229352  | -0.577022 | 8.451554 | 0.005411 | XM_222717    | Rgl1_predicted       |
| A_44_P729514  | -0.577376 | 9.689644 | 0.009895 | XM_573199    | RGD1560049_predicted |
| A_44_P130849  | -0.577743 | 8.230187 | 0.008975 | XM_224627    |                      |
| A_44_P534249  | -0.578016 | 14.39865 | 0.009912 | NM_001013874 | Ociad1               |
| A_44_P707011  | -0.578591 | 8.762253 | 0.003167 | CO393635     |                      |
| A_42_P747877  | -0.57873  | 10.76747 | 0.00304  | NM_172029    | Eif2b1               |
| A_44_P101223  | -0.579038 | 10.35117 | 0.001145 | XM_344744    | Gcdh_predicted       |
| A_44_P246311  | -0.580416 | 10.15275 | 0.006615 | NM_001017473 | MGC112682            |
| A_44_P548450  | -0.580709 | 10.99874 | 0.007588 | XM_225160    |                      |
| A_44_P356596  | -0.581185 | 10.9493  | 0.008387 | XM_342783    | RGD1304592_predicted |
| A_44_P368170  | -0.581794 | 8.855102 | 0.001661 | XM_342563    | Actr5_predicted      |
| A_44_P987846  | -0.581855 | 11.16986 | 0.006395 | XM_001075075 | Dpp8_predicted       |
| A_44_P246554  | -0.582001 | 8.905353 | 0.003826 | CO566833     |                      |
| A_44_P463557  | -0.582634 | 14.19713 | 0.004298 | NM_013067    | Rpn1                 |
| A_44_P231583  | -0.583034 | 10.75149 | 0.007279 | NM_032462    | Csen                 |
| A_44_P130732  | -0.583815 | 8.713516 | 0.003228 | XM_001064066 | LOC682999            |
| A_43_P15355   | -0.584685 | 13.54511 | 0.007016 | NM_130755    | Cs                   |
| A_44_P235090  | -0.586284 | 8.863998 | 0.005913 | XM_234988    | Btbd11_predicted     |

|               |           |          |          |              |                      |
|---------------|-----------|----------|----------|--------------|----------------------|
| A_44_P271989  | -0.586374 | 11.34059 | 0.0094   | XM_345169    | Zfr                  |
| A_44_P170070  | -0.586507 | 9.614184 | 0.004003 | XM_236380    | Rnf111_predicted     |
| A_44_P810365  | -0.586805 | 9.726458 | 0.009332 | CV104092     |                      |
| A_44_P382611  | -0.587121 | 10.96644 | 0.00759  | NM_001031651 | RGD1304758           |
| A_44_P444039  | -0.58729  | 8.409482 | 0.006954 | XM_215897    |                      |
| A_44_P637334  | -0.587827 | 10.97686 | 0.005035 |              |                      |
| A_44_P262569  | -0.58791  | 8.076643 | 0.001623 | XM_341961    | Tollip_predicted     |
| A_44_P344730  | -0.588025 | 7.880086 | 0.001613 | NM_001009405 | Arhgap29             |
| A_44_P103692  | -0.589224 | 10.07171 | 0.008032 | XM_234484    | RGD1309059_predicted |
| A_44_P698466  | -0.58941  | 8.937917 | 0.008468 | XM_001062636 |                      |
| A_44_P504298  | -0.589507 | 8.821758 | 0.007981 | XM_221077    | Cdc42ep4_predicted   |
| A_44_P509129  | -0.589766 | 8.808838 | 0.009171 | BC083806     | Tex2                 |
| A_42_P744464  | -0.590185 | 8.758601 | 0.004669 | XM_340740    | RGD1565449_predicted |
| A_43_P17175   | -0.590299 | 8.564087 | 0.001764 | NM_001031642 | Serpinb1a            |
| A_43_P21386   | -0.59044  | 8.419719 | 0.004713 | CB546740     |                      |
| A_43_P11905   | -0.590826 | 9.270507 | 0.006217 | NM_017303    | Kcnab1               |
| A_44_P471386  | -0.591807 | 13.18609 | 0.008934 | NM_001013107 | Dazap2               |
| A_44_P530041  | -0.592177 | 9.105207 | 0.007566 | XM_343804    | Hdac8_predicted      |
| A_44_P529718  | -0.592568 | 7.591056 | 0.00106  | XM_341914    | RGD1310509_predicted |
| A_44_P237220  | -0.592591 | 9.322389 | 0.000271 | XM_214720    |                      |
| A_44_P398587  | -0.592826 | 11.00259 | 0.006479 | XM_343766    | Usp9x_predicted      |
| A_44_P292327  | -0.593308 | 11.46625 | 0.006377 | NM_017006    | G6pdx                |
| A_44_P782486  | -0.593503 | 7.65762  | 0.00356  | XM_575380    | RGD1563612_predicted |
| A_44_P508462  | -0.593522 | 11.23446 | 0.009071 | NM_131911    | Anp32b               |
| A_44_P222011  | -0.593914 | 13.04026 | 0.005138 | NM_017343    | Mrlcb                |
| A_44_P312371  | -0.594586 | 12.02887 | 0.0022   | NM_172066    | Slc30a4              |
| A_43_P21821   | -0.595729 | 8.545106 | 0.004644 | CB547114     |                      |
| A_44_P222353  | -0.596088 | 8.508683 | 0.001984 | NM_001040128 | RGD1309546_predicted |
| A_44_P217462  | -0.596111 | 8.18643  | 0.002077 | U78138       |                      |
| A_43_P13557   | -0.597345 | 13.14417 | 0.002976 | CF110620     |                      |
| A_44_P226353  | -0.598015 | 11.01006 | 0.004433 | NM_031672    | Slc15a2              |
| A_44_P438269  | -0.598109 | 9.857028 | 0.000911 | NM_022585    | Azin1                |
| A_44_P1009692 | -0.598298 | 13.31779 | 0.004267 | NM_001025624 | Hmgn2                |
| A_43_P12191   | -0.598708 | 12.60738 | 0.00218  | NM_022265    | Pdcd4                |
| A_44_P302996  | -0.599223 | 11.48023 | 0.002285 | XM_342171    | RGD1562968_predicted |
| A_44_P461489  | -0.599266 | 8.962531 | 0.00937  | XM_231528    | RGD1559440_predicted |
| A_44_P686863  | -0.599609 | 11.85384 | 0.001206 |              |                      |
| A_43_P18281   | -0.599651 | 8.903045 | 0.000566 | XM_001057305 |                      |
| A_44_P703930  | -0.600012 | 8.125062 | 0.002394 |              |                      |
| A_44_P955997  | -0.600108 | 11.43887 | 0.002913 | DN932367     |                      |
| A_44_P327535  | -0.6004   | 8.105457 | 0.001482 | XR_007094    | LOC691397            |
| A_44_P1049827 | -0.600752 | 13.66577 | 0.008886 | NM_024128    | Nsg1                 |
| A_44_P516958  | -0.601174 | 11.62942 | 0.004807 | EF076766     |                      |
| A_43_P10835   | -0.601231 | 11.4609  | 0.008636 | BP482727     | RGD1308816_predicted |
| A_44_P823303  | -0.601517 | 7.675391 | 0.001111 |              |                      |
| A_44_P186813  | -0.602333 | 8.109993 | 0.004622 | XM_213276    | Rars_predicted       |
| A_44_P128711  | -0.602335 | 7.768201 | 0.008573 | XM_217566    | Sh3bgrl_predicted    |
| A_43_P18294   | -0.60239  | 7.598985 | 0.000823 | BC099835     |                      |
| A_44_P326176  | -0.602682 | 9.917051 | 0.005607 | XM_222244    | RGD1563628_predicted |

|              |           |          |          |              |                      |
|--------------|-----------|----------|----------|--------------|----------------------|
| A_44_P217909 | -0.602949 | 8.417672 | 0.002581 | XM_228644    | Mtmr1_predicted      |
| A_44_P851961 | -0.603248 | 8.122635 | 0.00924  | NM_001009504 | Fbxl16               |
| A_44_P325189 | -0.603659 | 13.30424 | 0.000582 | NM_175578    | Dscr1l1              |
| A_44_P789739 | -0.60378  | 10.19794 | 0.002178 | NM_001030024 | Slc19a2              |
| A_42_P688027 | -0.606511 | 9.303765 | 0.005323 | NM_030999    | Crhr1                |
| A_44_P114298 | -0.606513 | 8.87185  | 0.002852 | XM_215693    | Hiat1_predicted      |
| A_44_P344096 | -0.606913 | 9.736673 | 0.009398 | NM_138890    | Ehd3                 |
| A_43_P10536  | -0.607958 | 8.086298 | 0.007905 | XR_007603    |                      |
| A_44_P917935 | -0.607991 | 8.678929 | 0.007689 |              |                      |
| A_44_P377653 | -0.608356 | 9.62169  | 0.001543 |              |                      |
| A_43_P17872  | -0.608383 | 10.81552 | 0.006759 | CB545618     |                      |
| A_44_P142318 | -0.608411 | 10.34125 | 0.006816 | XM_222171    | Anapc7_predicted     |
| A_44_P400936 | -0.608664 | 12.47592 | 0.006637 | XR_006350    | LOC314123            |
| A_44_P735345 | -0.6091   | 7.725892 | 0.001624 | XM_576015    | RGD1560812_predicted |
| A_44_P495832 | -0.610195 | 7.98717  | 0.001613 | XM_343442    | Pgm3_predicted       |
| A_44_P356711 | -0.610563 | 7.862104 | 0.006197 | XM_343094    | Ttc7b_predicted      |
| A_44_P702685 | -0.61115  | 11.2384  | 0.006725 | CO402564     |                      |
| A_43_P18909  | -0.611317 | 9.101784 | 0.006293 | XM_236648    | Kif9_predicted       |
| A_44_P809536 | -0.611648 | 9.018063 | 0.002691 | AW144200     |                      |
| A_44_P475932 | -0.612343 | 9.506439 | 0.008437 | NM_001037496 | Otud5                |
| A_44_P465188 | -0.613837 | 12.99403 | 0.006046 | NM_053445    | Fads1                |
| A_44_P192018 | -0.613883 | 7.703809 | 0.000494 |              |                      |
| A_44_P354806 | -0.614498 | 11.63019 | 0.005472 | NM_172072    | Vps45                |
| A_44_P477135 | -0.615226 | 8.68826  | 0.002682 | NM_052801    | Vhl                  |
| A_44_P513246 | -0.615322 | 8.481193 | 0.004191 | XM_341091    | Fbxo21_predicted     |
| A_44_P348983 | -0.615971 | 8.261497 | 0.007893 | XM_340889    | Npepps               |
| A_44_P671422 | -0.616393 | 10.93854 | 0.004166 |              |                      |
| A_43_P18993  | -0.616672 | 10.24685 | 0.007665 | XM_216679    | Lamb1_predicted      |
| A_44_P261179 | -0.616735 | 9.356162 | 0.001222 | XM_343177    | LOC362845            |
| A_44_P384223 | -0.617224 | 12.50624 | 0.00345  | NM_024151    | Arf4                 |
| A_44_P358664 | -0.617255 | 10.2275  | 0.009024 | XM_223454    | Stim2_predicted      |
| A_44_P418824 | -0.617423 | 9.363052 | 0.001671 | NM_053430    | Fen1                 |
| A_44_P253196 | -0.617866 | 10.6956  | 0.001838 | XM_228114    | Arid5b_predicted     |
| A_43_P18795  | -0.618039 | 10.72011 | 0.008233 | NM_001047849 | Agpat6               |
| A_44_P108680 | -0.618465 | 8.102587 | 0.002297 | NM_057116    | Ppp2r2c              |
| A_44_P396772 | -0.619342 | 10.46003 | 0.001217 | NM_001037363 | Lrrn1                |
| A_44_P457129 | -0.619549 | 8.743385 | 0.006961 | XM_227809    | LOC310958            |
| A_44_P301812 | -0.619841 | 11.17309 | 0.004013 | NM_001005765 | Rap1a                |
| A_44_P183048 | -0.620055 | 10.77672 | 0.002498 | XM_233467    |                      |
| A_44_P199358 | -0.620299 | 10.4968  | 0.007816 | XM_229162    | RGD1561327_predicted |
| A_43_P12127  | -0.620811 | 14.8234  | 0.006163 | NM_021842    | Ensa                 |
| A_44_P526729 | -0.62244  | 9.842671 | 0.006342 | NM_031135    | Klf10                |
| A_44_P240973 | -0.622495 | 7.998083 | 0.00086  | NM_022264    | Kit                  |
| A_44_P370761 | -0.622587 | 8.463284 | 0.003614 | XM_236009    | Nfrkb_predicted      |
| A_44_P135944 | -0.62263  | 11.26265 | 0.008567 | XM_220178    | Adcy9_predicted      |
| A_44_P396198 | -0.623268 | 8.938957 | 0.00662  | NM_001025421 | Cugbp1               |
| A_44_P400884 | -0.62356  | 11.45829 | 0.004356 | XM_345073    |                      |
| A_44_P552986 | -0.623801 | 9.054984 | 0.002394 | NM_001007693 | Ttc9c                |
| A_44_P523016 | -0.623912 | 12.37282 | 0.009372 | NM_001024314 | LOC499913            |

|               |           |          |          |              |                      |
|---------------|-----------|----------|----------|--------------|----------------------|
| A_44_P1024729 | -0.623962 | 9.026463 | 0.001142 | XR_006336    | RGD1311429_predicted |
| A_44_P303777  | -0.624011 | 13.52164 | 0.00533  | AW143533     |                      |
| A_44_P271625  | -0.624662 | 14.84276 | 0.002663 | NM_053291    | Pgk1                 |
| A_43_P17160   | -0.62594  | 9.958981 | 0.00768  | NM_001017383 | Ppil2                |
| A_44_P469040  | -0.62652  | 8.165212 | 0.001126 | XM_235547    | RGD1560783_predicted |
| A_44_P917437  | -0.626641 | 9.558865 | 0.002512 |              |                      |
| A_44_P548203  | -0.626707 | 12.49294 | 0.005956 | BC087677     | Rbm3                 |
| A_44_P293124  | -0.628186 | 7.935044 | 0.009121 | NM_001044243 | Tasp1_predicted      |
| A_44_P321359  | -0.628274 | 10.01661 | 0.006258 | XM_226455    | Zfp612_predicted     |
| A_44_P779609  | -0.628795 | 8.320908 | 0.001183 | NM_001037652 | Zdhhc6               |
| A_44_P171183  | -0.629303 | 8.474922 | 0.00293  | NM_001044267 | MGC112775            |
| A_43_P13046   | -0.629635 | 9.752248 | 0.001519 | NM_057147    | Sec22l2              |
| A_44_P318999  | -0.629726 | 8.872416 | 0.008478 |              |                      |
| A_43_P10386   | -0.630223 | 12.97329 | 0.000518 | CA511607     |                      |
| A_44_P192548  | -0.630339 | 9.351752 | 0.001843 | XM_343535    | Gtpbp2               |
| A_44_P494723  | -0.630505 | 11.4003  | 0.009436 | XM_343716    |                      |
| A_44_P262192  | -0.631249 | 12.84926 | 0.009614 | NM_182814    | Cct4                 |
| A_44_P240248  | -0.632188 | 8.634159 | 0.003151 | AB012232     | Nfib                 |
| A_44_P492268  | -0.63219  | 10.8392  | 0.006459 | XM_212982    |                      |
| A_44_P403084  | -0.632293 | 9.823149 | 0.001151 | NM_001039044 | Cdc42se1             |
| A_44_P461807  | -0.632695 | 8.095919 | 0.000504 | XM_229225    | Baz2b_predicted      |
| A_44_P348825  | -0.632978 | 9.691787 | 0.003731 | NM_024150    | Arf2                 |
| A_44_P398014  | -0.633132 | 12.4155  | 0.0051   | NM_053448    | Hdac3                |
| A_44_P527134  | -0.63402  | 14.00775 | 0.007491 | BC081744     | Oxr1                 |
| A_44_P191962  | -0.634064 | 9.541643 | 0.005569 | NM_001007734 | Echdc1               |
| A_43_P19178   | -0.634171 | 8.223944 | 0.001053 | NM_031574    | Rasa3                |
| A_44_P400857  | -0.634452 | 12.21639 | 0.006584 | NM_001011926 | Fts                  |
| A_43_P13362   | -0.634717 | 10.72983 | 0.006961 | NM_139094    | Rbm16                |
| A_44_P908874  | -0.634786 | 8.955233 | 0.003401 |              |                      |
| A_44_P112488  | -0.635472 | 8.404066 | 0.0068   | XM_343087    | Galnt1               |
| A_44_P454180  | -0.635515 | 8.272513 | 0.003393 | NM_182675    | Rab40c               |
| A_44_P288548  | -0.63558  | 9.253557 | 0.004623 | XR_008866    | RGD1306534_predicted |
| A_44_P139291  | -0.635986 | 9.326605 | 0.001776 | XM_001058939 |                      |
| A_44_P791631  | -0.636117 | 8.807255 | 0.003104 | XM_227139    | RGD1565414_predicted |
| A_44_P473472  | -0.636139 | 10.61491 | 0.003947 | BC091233     | RGD1307434_predicted |
| A_44_P760606  | -0.637549 | 12.68986 | 0.002205 | XR_007237    |                      |
| A_42_P521902  | -0.637726 | 8.609116 | 0.000822 | NM_001079941 | Gtf3c5_predicted     |
| A_44_P345101  | -0.637911 | 10.42344 | 0.005728 | XM_217367    | Bai3_predicted       |
| A_44_P178179  | -0.638409 | 11.32229 | 0.008534 | XM_226561    | Pgbd5_predicted      |
| A_44_P508750  | -0.638435 | 8.171009 | 0.004833 | XM_001056358 |                      |
| A_42_P707937  | -0.639077 | 13.34077 | 0.000445 | NM_080583    | Ap2b1                |
| A_44_P1007105 | -0.63928  | 13.26468 | 0.00435  | NM_138905    | Ppap2b               |
| A_43_P22124   | -0.639677 | 13.337   | 0.004781 | NM_213625    | Dnajc7               |
| A_44_P859113  | -0.640213 | 8.953787 | 0.004534 | NM_199463    | Ripk5                |
| A_44_P148695  | -0.640551 | 9.640543 | 0.000911 | XM_240915    | RGD1307915_predicted |
| A_43_P12462   | -0.641286 | 8.041492 | 0.002222 | NM_030863    | Msn                  |
| A_44_P383199  | -0.641381 | 9.791592 | 0.002582 | XM_214649    | RGD1308706_predicted |
| A_44_P267595  | -0.641725 | 10.04405 | 0.007378 | XM_233839    | Eml4_predicted       |
| A_44_P323882  | -0.641998 | 9.658085 | 0.003262 | NM_001013073 | Btbd9                |

|               |           |          |          |              |                      |
|---------------|-----------|----------|----------|--------------|----------------------|
| A_44_P477889  | -0.642086 | 13.29279 | 0.004444 | NM_031783    | Nefl                 |
| A_44_P523112  | -0.643135 | 11.37171 | 0.003507 | XM_232937    | RGD1306148_predicted |
| A_44_P840751  | -0.643651 | 8.0978   | 0.00193  |              |                      |
| A_43_P11938   | -0.643668 | 7.909169 | 0.0072   | NM_017364    | Zfp260               |
| A_44_P340839  | -0.643741 | 8.838773 | 0.004557 | XM_001055446 |                      |
| A_43_P17983   | -0.644983 | 12.6799  | 0.006621 | XM_342679    | Cul1_predicted       |
| A_44_P1054864 | -0.645182 | 11.12162 | 0.002305 | NM_001007662 | Arcn1                |
| A_44_P825644  | -0.64519  | 9.057609 | 0.003705 |              |                      |
| A_44_P369701  | -0.646083 | 11.87503 | 0.003244 | NM_001025660 | Ei24                 |
| A_44_P152395  | -0.646432 | 12.2429  | 0.008762 | NM_001013222 | Rnd1                 |
| A_44_P365882  | -0.646949 | 10.84827 | 0.004004 | NM_001014046 | RGD1308697           |
| A_44_P177678  | -0.647221 | 8.401784 | 0.007057 | CB547239     |                      |
| A_44_P375613  | -0.647271 | 10.40813 | 0.006682 | NM_001013183 | Narfl                |
| A_44_P235336  | -0.648526 | 9.743373 | 0.001962 | NM_001083966 | Rev3l                |
| A_44_P438478  | -0.648574 | 14.64021 | 0.009817 | XR_006258    |                      |
| A_44_P523924  | -0.648626 | 9.63477  | 0.008841 | NM_001007689 | Ciapin1              |
| A_44_P449969  | -0.648891 | 8.622949 | 0.001171 | NM_001009258 | Chfr                 |
| A_43_P17172   | -0.648993 | 7.549533 | 0.000382 | XM_213385    | Prpf8                |
| A_44_P514539  | -0.649428 | 12.17488 | 0.005961 | NM_001008324 | Eif4b                |
| A_44_P442941  | -0.649561 | 9.201323 | 0.00355  | NM_032067    | Ralbp1               |
| A_43_P18744   | -0.650106 | 11.15677 | 0.002633 | NM_001012744 | Enpp5                |
| A_44_P443343  | -0.650592 | 7.957523 | 0.001555 | XM_216091    | Pdk3                 |
| A_44_P137262  | -0.650642 | 10.46178 | 0.003983 | NM_148891    | Nmt1                 |
| A_44_P366056  | -0.6509   | 9.137319 | 0.001343 | XM_233418    | Mmachc_predicted     |
| A_44_P395709  | -0.651297 | 12.14363 | 0.005458 | NM_134366    | Rac1                 |
| A_44_P422063  | -0.651673 | 8.392712 | 0.006469 | XM_228173    | Gopc_predicted       |
| A_43_P17344   | -0.652063 | 8.310589 | 0.001639 | XM_232252    | Bcl2l13_predicted    |
| A_44_P555261  | -0.652078 | 8.380619 | 0.008749 | NM_031057    | Aldh6a1              |
| A_43_P12591   | -0.65239  | 7.777536 | 0.000543 | NM_031569    | Oprl1                |
| A_44_P441434  | -0.6525   | 9.111109 | 0.003536 | NM_131914    | Cav2                 |
| A_44_P248111  | -0.652911 | 9.320377 | 0.004791 | NM_001047107 | Igsf4c_predicted     |
| A_44_P794608  | -0.657157 | 9.089318 | 0.00904  | AI112975     |                      |
| A_44_P594969  | -0.657411 | 7.785626 | 0.0006   |              |                      |
| A_43_P18497   | -0.657706 | 8.96092  | 0.001825 | NM_001007609 | Mfap3                |
| A_43_P13344   | -0.657852 | 8.783735 | 0.008338 | NM_138976    | Mfn1                 |
| A_44_P272294  | -0.658024 | 7.434132 | 0.000969 | XM_233937    | Asxl2_predicted      |
| A_44_P255341  | -0.658029 | 10.7227  | 0.003693 | XM_222661    | Ipo9_predicted       |
| A_44_P342314  | -0.658159 | 13.2173  | 0.009311 | NM_001014232 | RGD1308373           |
| A_43_P18271   | -0.658212 | 11.17964 | 0.005555 | XM_576264    | RGD1564335_predicted |
| A_44_P466827  | -0.658495 | 9.300238 | 0.007269 | NM_001034835 | RGD1309220           |
| A_44_P233867  | -0.659003 | 9.728503 | 0.003555 | NM_172067    | Spon1                |
| A_44_P1007438 | -0.659371 | 9.813387 | 0.004121 | NM_001044238 | Gdpd1_predicted      |
| A_44_P215210  | -0.659582 | 9.528286 | 0.00427  | XM_342568    | Ptptr_predicted      |
| A_44_P166216  | -0.659636 | 14.18189 | 0.004388 | NM_001013059 | Ndfip1               |
| A_44_P886861  | -0.65992  | 11.82148 | 0.002477 | NM_001024245 | Ccdc32               |
| A_44_P170710  | -0.660042 | 13.38092 | 0.007866 | NM_013060    | Id2                  |
| A_44_P344397  | -0.661307 | 11.05304 | 0.007497 | NM_001024233 | Bles03               |
| A_43_P17012   | -0.661735 | 13.29255 | 0.003819 | NM_001014227 | RGD1307010           |
| A_44_P667977  | -0.663111 | 9.045672 | 0.004604 | XR_007894    | LOC367705            |

|               |           |          |          |              |                      |
|---------------|-----------|----------|----------|--------------|----------------------|
| A_44_P902742  | -0.663318 | 11.53225 | 0.001062 | XM_343576    | Als2cr13_predicted   |
| A_42_P826202  | -0.663566 | 8.962978 | 0.006901 | NM_153732    | Zfp597               |
| A_44_P147702  | -0.663636 | 8.978381 | 0.003573 | XM_340853    | RGD1311017_predicted |
| A_43_P12487   | -0.664083 | 9.881514 | 0.001847 | NM_031040    | Grm7                 |
| A_44_P324042  | -0.664103 | 9.089293 | 0.004246 | NM_001034150 | Srpr                 |
| A_44_P477927  | -0.665178 | 9.91646  | 0.003267 | NM_013225    | Cntn6                |
| A_44_P1026688 | -0.665491 | 11.02828 | 0.006486 | NM_001014263 | Sypl                 |
| A_44_P552977  | -0.665722 | 9.640369 | 0.003625 | NM_001007693 | Ttc9c                |
| A_44_P175751  | -0.66592  | 8.42582  | 0.006218 | XR_009314    | LOC690211            |
| A_44_P352268  | -0.665997 | 13.87135 | 0.000486 | NM_031821    | Plk2                 |
| A_44_P241439  | -0.666017 | 12.2453  | 0.003634 | NM_001024789 | Nap1l2               |
| A_44_P288691  | -0.66628  | 12.61409 | 0.008512 |              |                      |
| A_44_P475371  | -0.666669 | 9.786368 | 0.004316 | XM_342812    | Ccnc                 |
| A_44_P334195  | -0.666683 | 11.19342 | 0.003964 | NM_001007624 | Qars                 |
| A_44_P175461  | -0.667045 | 8.767074 | 0.001832 | XM_239761    | RGD1565602_predicted |
| A_43_P12936   | -0.66754  | 11.16029 | 0.009331 | NM_053801    | Sec14l2              |
| A_44_P485453  | -0.667632 | 10.32878 | 0.008859 | XM_001063164 | RGD1561943_predicted |
| A_44_P744519  | -0.667916 | 13.73968 | 0.00043  | NM_012992    | Npm1                 |
| A_42_P654739  | -0.668259 | 9.014156 | 0.003873 | XM_221888    | Rnf6_predicted       |
| A_44_P208880  | -0.668399 | 10.47121 | 0.006465 | NM_001038595 | Dnaja3               |
| A_44_P476107  | -0.668587 | 11.31869 | 0.003496 | XM_217278    |                      |
| A_44_P217590  | -0.668667 | 9.059417 | 0.000726 | NM_053794    | Prkwnk1              |
| A_44_P199661  | -0.669436 | 8.687349 | 0.006699 | XM_341464    | RGD1563853_predicted |
| A_44_P632544  | -0.669509 | 7.896681 | 0.005783 | AA944304     |                      |
| A_44_P231556  | -0.669772 | 7.869283 | 0.00065  | NM_001077589 | Rgs16                |
| A_44_P658594  | -0.670139 | 9.191758 | 0.000253 | CO575464     |                      |
| A_44_P269596  | -0.671296 | 13.26019 | 0.006176 | XM_344976    | Psmc13_predicted     |
| A_44_P328302  | -0.672591 | 8.777259 | 0.002665 | XM_213992    | Glmn                 |
| A_44_P473322  | -0.672656 | 7.868224 | 0.006082 | XM_224778    |                      |
| A_44_P293944  | -0.672671 | 13.8667  | 0.007733 | NM_001005908 | Ghitm                |
| A_44_P775787  | -0.673339 | 11.32534 | 0.00098  | XM_575783    | LOC500420            |
| A_44_P281959  | -0.673402 | 8.081822 | 0.000983 | XM_218006    | RGD1310304_predicted |
| A_44_P421391  | -0.673725 | 8.967514 | 0.008583 | NM_198763    | Slc1a4               |
| A_44_P414757  | -0.674502 | 9.692538 | 0.00543  | NM_001024770 | Sec3l1               |
| A_44_P521893  | -0.674632 | 8.832269 | 0.00481  | BG669130     |                      |
| A_43_P11734   | -0.674874 | 9.655395 | 0.008583 | NM_013145    | Gnai1                |
| A_42_P814410  | -0.67517  | 11.87156 | 0.007169 | NM_212500    | Gnl1                 |
| A_44_P175681  | -0.675396 | 10.52681 | 0.00529  | NM_001014011 | Gramd3               |
| A_44_P492635  | -0.67561  | 14.04256 | 0.005462 | NM_001008281 | Psmc3                |
| A_44_P243102  | -0.677044 | 8.408617 | 0.008294 | NM_017007    | Gad1                 |
| A_44_P172941  | -0.67789  | 9.432247 | 0.006219 | NM_182821    | Pxk                  |
| A_43_P20530   | -0.678095 | 8.871127 | 0.006082 | XM_231400    | Steap2_predicted     |
| A_44_P482200  | -0.678514 | 12.40565 | 0.003411 | XM_222785    | Astn1                |
| A_44_P112546  | -0.679215 | 9.419917 | 0.009026 | CO400633     | RGD1309873_predicted |
| A_44_P182555  | -0.681208 | 11.999   | 0.008571 | NM_138509    | Mapre1               |
| A_44_P375322  | -0.681511 | 10.1816  | 0.00845  | XM_001074519 | Trpc4ap              |
| A_44_P338095  | -0.681595 | 9.584036 | 0.00481  | NM_001013112 | Hibch                |
| A_44_P525482  | -0.68227  | 8.987538 | 0.005143 | CB546704     |                      |
| A_44_P300612  | -0.683667 | 10.59645 | 0.004338 | NM_022850    | Dpp6                 |

|              |           |          |          |              |                      |
|--------------|-----------|----------|----------|--------------|----------------------|
| A_42_P712718 | -0.683836 | 10.9304  | 0.005702 | NM_001004280 | RGD1303272           |
| A_43_P19662  | -0.683865 | 8.366867 | 0.004069 | CB547048     |                      |
| A_44_P121457 | -0.683919 | 12.36108 | 0.004367 | NM_001037778 | Dctn5                |
| A_44_P340490 | -0.684095 | 8.01205  | 0.005384 | XM_221232    | RGD1310429_predicted |
| A_44_P104679 | -0.684853 | 9.308212 | 0.005798 | NM_053481    | Pik3cb               |
| A_43_P18706  | -0.684899 | 8.990666 | 0.003995 | NM_001012103 | Trim32               |
| A_44_P686038 | -0.686229 | 9.953226 | 0.000504 | NM_022198    | Cicn4-2              |
| A_44_P509099 | -0.686288 | 11.11681 | 0.003834 | NM_001008382 | Cnot8                |
| A_44_P248598 | -0.68654  | 9.140249 | 4.10E-05 | NM_001017459 | LOC314859            |
| A_44_P332041 | -0.686639 | 11.95608 | 0.009963 | NM_022385    | Arl1                 |
| A_44_P525827 | -0.686772 | 12.63864 | 0.003991 | NM_199091    | Cct3                 |
| A_44_P324066 | -0.687064 | 8.571865 | 0.004003 | XM_001072853 | LOC689997            |
| A_44_P149734 | -0.687945 | 9.954353 | 0.005321 | NM_001009657 | Hat1                 |
| A_44_P466041 | -0.688036 | 10.14526 | 0.001573 | NM_001007682 | Thtpa                |
| A_43_P11763  | -0.689954 | 8.225533 | 0.001545 | Z49081       | Add1                 |
| A_44_P466565 | -0.690363 | 10.13551 | 0.005187 | XM_001058018 | RGD1565759_predicted |
| A_44_P959355 | -0.690506 | 14.41659 | 0.00172  | XR_008469    | LOC361963            |
| A_44_P636077 | -0.691064 | 9.295773 | 0.002041 | XM_225093    | RGD1308377_predicted |
| A_44_P192568 | -0.691346 | 9.9763   | 0.005102 | NM_172335    | Gm2a                 |
| A_44_P321605 | -0.691528 | 14.38762 | 0.00993  | XM_576504    | LOC501089            |
| A_44_P715184 | -0.692584 | 8.486267 | 0.003501 | XM_215883    | Kif3b_predicted      |
| A_44_P557979 | -0.692677 | 8.67592  | 0.002177 | NM_001012190 | Ubp1                 |
| A_44_P285741 | -0.692747 | 9.249087 | 0.009985 | NM_031556    | Cav                  |
| A_44_P128629 | -0.693207 | 10.22845 | 0.006852 | XM_344744    | Gcdh_predicted       |
| A_43_P18261  | -0.693296 | 11.92018 | 0.002116 | NM_001008345 | Mesdc2               |
| A_44_P356538 | -0.693746 | 10.46584 | 0.002295 | XM_341666    | Zfp330_predicted     |
| A_43_P16735  | -0.694316 | 11.01645 | 0.007446 | XM_340886    | Nfe2l1_predicted     |
| A_44_P426707 | -0.694392 | 12.88563 | 0.009882 | XM_001053199 | RGD1560511_predicted |
| A_44_P370502 | -0.695424 | 8.655955 | 0.009894 | XM_342445    | RGD1561141_predicted |
| A_44_P516017 | -0.695966 | 10.87721 | 0.006661 | NM_001031648 | Efhd2                |
| A_44_P234362 | -0.696237 | 7.659072 | 0.000406 | NM_001007745 | Tmem43               |
| A_44_P781559 | -0.696443 | 12.18886 | 0.006077 | XM_233944    | Ncoa1_predicted      |
| A_44_P543350 | -0.696783 | 8.474691 | 0.00037  | NM_017063    | Kpnb1                |
| A_44_P371823 | -0.697464 | 9.537366 | 0.006001 | XM_242940    |                      |
| A_44_P471818 | -0.697741 | 9.200884 | 0.003551 | XM_001071384 | LOC689616            |
| A_44_P405679 | -0.697777 | 9.039271 | 0.009317 | XM_233609    | Rap1ga1              |
| A_43_P16946  | -0.697811 | 9.672708 | 0.007204 | XM_213649    | Ifnar1_predicted     |
| A_44_P509473 | -0.698504 | 10.44605 | 0.005045 | NM_139060    | Csnk1d               |
| A_44_P503673 | -0.699146 | 9.366485 | 0.006058 | XM_341100    | Ulk1                 |
| A_44_P386748 | -0.702079 | 13.34473 | 0.009233 | NM_001007616 | Wsb2                 |
| A_43_P20777  | -0.702381 | 9.632501 | 0.009165 | XM_341474    | Nsun2_predicted      |
| A_43_P15781  | -0.702694 | 9.424702 | 0.009951 | BC090029     | Jak1                 |
| A_44_P345009 | -0.704027 | 10.85685 | 0.006687 | NM_001008526 | Bag5                 |
| A_43_P16640  | -0.704181 | 11.01546 | 0.006406 | XM_343298    | RGD1311547           |
| A_44_P822082 | -0.704323 | 13.25393 | 0.004761 | XR_009104    |                      |
| A_44_P648671 | -0.706766 | 11.58223 | 0.006472 | XM_001076507 | RGD1559498_predicted |
| A_44_P928907 | -0.706901 | 9.190431 | 0.000626 | XM_574241    | RGD1565049_predicted |
| A_44_P229079 | -0.707063 | 11.94041 | 0.00343  | XM_344434    | Rb1                  |
| A_44_P510470 | -0.707064 | 8.08123  | 0.008377 | NM_053487    | Pex11a               |

|              |           |          |          |              |                      |
|--------------|-----------|----------|----------|--------------|----------------------|
| A_44_P278923 | -0.707738 | 10.52196 | 6.05E-05 | XM_224623    | Oxnad1_predicted     |
| A_44_P132822 | -0.707764 | 8.916867 | 0.001035 | NM_001005265 | Crry                 |
| A_44_P110098 | -0.708323 | 10.09779 | 0.001122 | NM_001080783 | RGD1311552_predicted |
| A_44_P260850 | -0.708435 | 9.12765  | 0.0044   | CO394432     |                      |
| A_44_P206520 | -0.709319 | 10.11567 | 0.004135 | XM_217385    | Lman2l_predicted     |
| A_44_P429364 | -0.710105 | 10.76198 | 0.000908 | NM_001012113 | Ptdss1               |
| A_44_P135339 | -0.710133 | 14.74068 | 0.002906 | NM_175761    | Hspca                |
| A_44_P459851 | -0.710349 | 9.658631 | 0.001275 | XM_340974    | Dscr3_predicted      |
| A_44_P442873 | -0.710445 | 13.18986 | 0.000449 | NM_053739    | Becn1                |
| A_44_P535400 | -0.710756 | 10.29758 | 0.00891  | AW916612     |                      |
| A_44_P463996 | -0.710903 | 8.168438 | 0.000841 | XM_344971    | Inpp5a_predicted     |
| A_44_P637889 | -0.711137 | 9.731263 | 0.001241 |              |                      |
| A_44_P271368 | -0.711859 | 13.0028  | 0.00484  | AW917142     |                      |
| A_44_P494644 | -0.712484 | 11.96627 | 0.006901 | NM_001012075 | Tspyl4               |
| A_44_P365653 | -0.713637 | 11.76364 | 0.005634 | NM_001014161 | LOC361596            |
| A_44_P222779 | -0.713943 | 8.50309  | 0.000525 | XM_342937    | RGD1305162_predicted |
| A_44_P543288 | -0.714546 | 10.03262 | 0.003176 | NM_031704    | Stx5a                |
| A_42_P724600 | -0.71565  | 10.02345 | 0.003976 | NM_001006976 | Tars                 |
| A_44_P281540 | -0.715686 | 8.615028 | 0.000588 | XM_215428    | LOC294560            |
| A_44_P329139 | -0.715693 | 8.394615 | 0.006545 | XM_224588    | Arhgef3_predicted    |
| A_43_P17974  | -0.716595 | 9.515081 | 0.005591 | XM_341688    | Cog4_predicted       |
| A_44_P295151 | -0.716847 | 9.093263 | 0.000871 | XM_224561    | Flnb_predicted       |
| A_44_P403209 | -0.717596 | 9.277081 | 0.005136 | NM_001013073 | Btbd9                |
| A_43_P19299  | -0.718378 | 7.772278 | 0.0002   | XM_235571    | RGD1309983_predicted |
| A_44_P323430 | -0.718496 | 9.88312  | 0.002903 | NM_138532    | Nme7                 |
| A_44_P128447 | -0.719167 | 11.31551 | 0.003131 | NM_001007680 | Abhd6                |
| A_44_P229618 | -0.71918  | 8.367113 | 0.000769 | XM_228065    | Tmem1_predicted      |
| A_44_P187789 | -0.719962 | 8.124942 | 0.007832 | XM_001066818 |                      |
| A_44_P474509 | -0.720164 | 12.50656 | 0.001046 | CO394478     |                      |
| A_44_P389212 | -0.720654 | 11.51459 | 0.007951 | NM_001024975 | RGD1307336           |
| A_44_P887061 | -0.720696 | 10.08852 | 0.007313 | BC107438     |                      |
| A_44_P260644 | -0.72127  | 8.407463 | 0.001474 | XM_576264    | RGD1564335_predicted |
| A_44_P437641 | -0.721334 | 9.637998 | 0.001922 | NM_001007702 | RGD1359108           |
| A_44_P366177 | -0.72167  | 9.880374 | 0.004393 | DN933141     | LOC681352            |
| A_43_P17527  | -0.722108 | 8.781197 | 0.00568  | NM_001024261 | Trnt1                |
| A_44_P250983 | -0.722291 | 10.81962 | 0.000881 | XM_001057073 | LOC680451            |
| A_44_P124294 | -0.722674 | 9.650509 | 0.004216 | NM_001012003 | Orc2l                |
| A_44_P538531 | -0.722867 | 10.08705 | 0.002979 | NM_053742    | Pitpnb               |
| A_44_P424092 | -0.722882 | 8.510474 | 0.006779 | NM_001025669 | RGD1307161           |
| A_44_P189909 | -0.723969 | 10.66671 | 0.002177 | NM_001025020 | RGD1310753           |
| A_44_P607982 | -0.724047 | 8.726039 | 0.009631 |              |                      |
| A_44_P210461 | -0.724218 | 14.11055 | 0.002096 | NM_017025    | Ldha                 |
| A_44_P227121 | -0.725426 | 9.930826 | 0.000234 | XM_341301    | RGD1306755_predicted |
| A_44_P356322 | -0.725778 | 10.89637 | 0.001673 | XM_219482    |                      |
| A_44_P126131 | -0.726175 | 8.173707 | 0.001792 | XM_341215    | Tbc1d1_predicted     |
| A_44_P827919 | -0.726469 | 9.333749 | 0.00967  |              |                      |
| A_42_P521609 | -0.726957 | 9.608308 | 0.002166 | XM_221635    | Morc3_predicted      |
| A_43_P12890  | -0.727081 | 8.909091 | 0.003676 | NM_053665    | Akap1                |
| A_44_P126310 | -0.72742  | 12.22158 | 0.00529  | NM_001005537 | Ik                   |



|               |           |          |          |              |                   |
|---------------|-----------|----------|----------|--------------|-------------------|
| A_44_P438442  | -0.728064 | 8.337862 | 0.006042 | XM_001069431 |                   |
| A_44_P197041  | -0.728079 | 10.51144 | 0.001425 | NM_001035221 | Ypel5             |
| A_44_P320894  | -0.728496 | 10.37575 | 0.003358 | NM_013090    | Vamp1             |
| A_44_P854406  | -0.729    | 8.456598 | 0.007527 |              |                   |
| A_44_P400112  | -0.729177 | 12.19754 | 0.006955 | CO384551     |                   |
| A_44_P326124  | -0.729686 | 15.26894 | 0.002926 | XM_001056105 | LOC679385         |
| A_44_P154367  | -0.730342 | 9.281083 | 0.004187 | NM_001024744 | Cdc16             |
| A_44_P530424  | -0.732079 | 12.73546 | 0.004615 | BC085931     | RGD1309459        |
| A_44_P116846  | -0.732713 | 10.5152  | 8.84E-05 | XM_341384    | LOC361098         |
| A_44_P250412  | -0.733285 | 9.320603 | 0.003192 | NM_001007713 | Tmbim1            |
| A_43_P13047   | -0.735128 | 8.592086 | 0.003122 | NM_057148    | Sep.02            |
| A_44_P103160  | -0.735662 | 10.16767 | 0.001835 | XM_342909    | Inpp5b            |
| A_43_P11514   | -0.736388 | 11.08872 | 0.002482 | NM_012678    | Tpm4              |
| A_44_P119007  | -0.736654 | 11.29753 | 0.002083 | NM_172321    | Slc6a15           |
| A_44_P729866  | -0.737709 | 10.44694 | 0.001265 | CA511309     |                   |
| A_44_P300506  | -0.738032 | 13.37647 | 0.000788 | NM_022399    | Calr              |
| A_44_P656856  | -0.738458 | 11.02773 | 0.008158 | CK596682     |                   |
| A_44_P557962  | -0.73918  | 14.79963 | 0.00234  | XM_232602    |                   |
| A_44_P520190  | -0.739506 | 8.711355 | 0.007267 | NM_134414    | Exoc2             |
| A_44_P443030  | -0.739533 | 10.324   | 0.005014 | XM_223227    | Sept6_predicted   |
| A_44_P525645  | -0.739723 | 8.785316 | 0.001623 | XM_220442    |                   |
| A_44_P550581  | -0.739757 | 8.369567 | 0.001509 | XM_218411    | Dmpk_predicted    |
| A_44_P434216  | -0.740314 | 10.10546 | 0.004603 | NM_001012193 | Rdh11             |
| A_43_P12932   | -0.740654 | 12.20032 | 0.002856 | NM_053788    | Stx1a             |
| A_44_P233736  | -0.74102  | 11.56517 | 0.004468 | NM_001004090 | Tspan5            |
| A_44_P489120  | -0.741475 | 10.20944 | 0.008299 | NM_001007701 | Tram1             |
| A_44_P440633  | -0.741539 | 10.4556  | 0.000987 | NM_031639    | Dlgh3             |
| A_44_P415412  | -0.742562 | 8.633771 | 0.005222 | NM_001004252 | Farslb            |
| A_44_P445318  | -0.742956 | 10.76738 | 0.002692 | XM_215985    |                   |
| A_43_P15432   | -0.742965 | 8.174573 | 0.003091 | NM_053910    | Pscd1             |
| A_44_P1015001 | -0.743467 | 8.405712 | 0.008775 | U50842       | Nedd4a            |
| A_44_P1014311 | -0.743779 | 8.744107 | 0.003717 | XM_343619    | Atg16l1_predicted |
| A_44_P248484  | -0.743898 | 13.35195 | 0.003782 | XM_001069080 | LOC367617         |
| A_44_P312484  | -0.743971 | 10.08945 | 0.002171 | XM_213426    | Mtmr4_predicted   |
| A_44_P405793  | -0.745803 | 9.317497 | 0.000835 | XM_244089    | Npas2_predicted   |
| A_44_P473754  | -0.746888 | 9.118205 | 0.001714 | XM_221656    | Son               |
| A_43_P18072   | -0.746961 | 8.805348 | 0.001287 | NM_001013413 | Als2              |
| A_44_P714315  | -0.747239 | 12.25655 | 0.002346 | CO404950     |                   |
| A_43_P18263   | -0.750304 | 8.603148 | 0.005633 | NM_001025421 | Cugbp1            |
| A_44_P760403  | -0.750365 | 11.83512 | 0.000948 |              |                   |
| A_44_P454177  | -0.750546 | 9.564492 | 0.005748 | NM_182675    | Rab40c            |
| A_43_P20387   | -0.750553 | 8.592192 | 0.001522 | XM_232614    | Arfgef1_predicted |
| A_44_P853268  | -0.751009 | 8.775023 | 0.000223 | CO393484     |                   |
| A_43_P16469   | -0.751323 | 10.77797 | 0.006331 | NM_001083313 | Chmp1a            |
| A_43_P10226   | -0.751437 | 10.42195 | 0.009819 | XM_236333    | Lrrc49_predicted  |
| A_44_P159569  | -0.75145  | 9.190013 | 0.000607 | NM_001039587 | Wdr45l_predicted  |
| A_44_P330332  | -0.751549 | 8.728765 | 0.003646 | BC129128     |                   |
| A_44_P229800  | -0.754324 | 9.060456 | 0.009386 | NM_001011991 | Ndrgr1            |
| A_43_P15423   | -0.754442 | 9.635179 | 0.0005   | NM_019239    | Mgat3             |

|               |           |          |          |              |                      |
|---------------|-----------|----------|----------|--------------|----------------------|
| A_44_P806641  | -0.754958 | 11.49879 | 0.005591 | XM_236024    |                      |
| A_44_P187293  | -0.755579 | 11.71979 | 0.0067   | XM_344175    |                      |
| A_44_P286719  | -0.756576 | 9.510973 | 0.004347 | XM_224863    | Snx25                |
| A_44_P321686  | -0.756834 | 8.771057 | 0.006453 | XM_001060299 |                      |
| A_44_P270510  | -0.757372 | 8.717218 | 0.005432 | XM_220420    | Aff4_predicted       |
| A_44_P203842  | -0.757977 | 8.823596 | 0.00582  | BP485454     | RGD1559751_predicted |
| A_44_P145416  | -0.758544 | 8.271167 | 0.003876 | NM_001007646 | Fkbp9                |
| A_44_P775952  | -0.759294 | 12.15302 | 0.001784 |              |                      |
| A_44_P482512  | -0.759667 | 10.47499 | 0.000794 | XM_343513    | Aplp2                |
| A_44_P548303  | -0.760193 | 8.571865 | 0.004889 | NM_001009688 | Thumpd1              |
| A_44_P375252  | -0.760435 | 9.392698 | 0.00157  | XM_342379    | Ehmt1_predicted      |
| A_44_P838313  | -0.760683 | 13.05444 | 0.001    |              |                      |
| A_43_P17880   | -0.762673 | 8.703786 | 0.000302 | NM_182953    | Nek6                 |
| A_44_P545635  | -0.762675 | 8.296813 | 0.00081  | AY325140     | RGD1560766_predicted |
| A_44_P541378  | -0.762945 | 7.579984 | 0.000277 | NM_001014242 | Isoc1                |
| A_44_P475159  | -0.762947 | 13.19762 | 0.001813 | NM_012673    | Thy1                 |
| A_44_P261818  | -0.76305  | 9.329422 | 0.004341 | BC087666     |                      |
| A_44_P806713  | -0.763825 | 10.53177 | 0.0004   |              |                      |
| A_44_P1020219 | -0.764497 | 8.876013 | 0.003207 | CO574509     | Rundc1_predicted     |
| A_44_P439573  | -0.764536 | 13.61199 | 0.000165 | DV728042     |                      |
| A_43_P12453   | -0.764651 | 9.151736 | 0.005921 | NM_030839    | Syt13                |
| A_44_P253601  | -0.765994 | 8.243451 | 0.001336 | NM_001025009 | Josd1                |
| A_44_P203793  | -0.766671 | 11.35587 | 0.002354 | NM_001013912 | MlIt11               |
| A_44_P172936  | -0.767375 | 9.619187 | 0.009972 | NM_138613    | Zfp179               |
| A_44_P229670  | -0.767526 | 12.75535 | 0.008309 | XM_001075438 | LOC686934            |
| A_44_P451014  | -0.768482 | 10.82196 | 0.006677 | NM_017322    | Mapk9                |
| A_44_P203665  | -0.768518 | 8.505706 | 0.004547 | XM_223270    | Ccng2_predicted      |
| A_44_P550454  | -0.768846 | 7.804654 | 0.000548 |              |                      |
| A_44_P213320  | -0.768863 | 14.2796  | 0.00708  | XM_236873    | LOC688956            |
| A_44_P852634  | -0.769854 | 8.744858 | 0.001617 | XR_007953    | LOC501135            |
| A_44_P961330  | -0.770326 | 10.5835  | 0.00473  |              |                      |
| A_44_P351789  | -0.770822 | 9.291229 | 0.005812 | XM_341509    | Cd83_predicted       |
| A_44_P134405  | -0.770887 | 9.108849 | 0.004683 | NM_031798    | Slc12a2              |
| A_44_P545727  | -0.771223 | 10.49515 | 0.001557 | XM_341086    | Fln29                |
| A_44_P236656  | -0.771271 | 9.238519 | 0.001101 | XM_343817    | Gla                  |
| A_44_P832837  | -0.771519 | 9.96242  | 0.007956 | AW143397     |                      |
| A_44_P230410  | -0.771562 | 12.57756 | 0.007994 | NM_031600    | Ptpn2                |
| A_44_P363204  | -0.77167  | 8.892924 | 0.006836 | NM_053824    | Csnk2a1              |
| A_44_P274397  | -0.771797 | 10.44541 | 0.004003 | NM_001033700 | Lass2                |
| A_43_P17671   | -0.772099 | 8.388576 | 0.001237 | NM_001014186 | LOC362304            |
| A_44_P150089  | -0.7723   | 8.616038 | 0.001656 | NM_001013229 | Eral1                |
| A_44_P671470  | -0.772302 | 9.103882 | 0.004433 |              |                      |
| A_44_P459301  | -0.77262  | 9.149703 | 0.007149 | XM_219377    | LOC309016            |
| A_44_P377645  | -0.773449 | 8.537705 | 0.000106 | XM_342774    |                      |
| A_44_P287250  | -0.773756 | 11.2841  | 0.008399 | NM_022521    | Oat                  |
| A_44_P538538  | -0.774107 | 11.86528 | 0.008686 | NM_017357    | Hpcal4               |
| A_44_P250030  | -0.775557 | 8.910662 | 0.009305 | NM_013107    | Bmp6                 |
| A_44_P142562  | -0.776339 | 13.17596 | 0.003051 | NM_001007643 | Tmx2                 |
| A_44_P215689  | -0.77949  | 12.56723 | 0.007158 | XM_343744    | LOC686934            |

|               |           |          |          |              |                      |
|---------------|-----------|----------|----------|--------------|----------------------|
| A_44_P725617  | -0.779699 | 12.15481 | 0.001587 | BF548107     |                      |
| A_44_P138363  | -0.779752 | 11.52163 | 0.008934 | XM_344057    | LOC363849            |
| A_44_P184279  | -0.78011  | 11.55638 | 0.008311 | NM_012504    | Atp1a1               |
| A_43_P17443   | -0.780406 | 8.247825 | 9.77E-05 | XM_230647    | Rin2_predicted       |
| A_44_P157118  | -0.781188 | 9.479825 | 0.004446 | BC089114     | Foxred1_predicted    |
| A_44_P159455  | -0.782713 | 8.994728 | 0.002178 | XM_001062352 | lbtck_predicted      |
| A_44_P208711  | -0.782766 | 13.39    | 0.009113 | XM_001075438 |                      |
| A_44_P290703  | -0.782788 | 15.64819 | 0.002914 | XM_226680    |                      |
| A_44_P322500  | -0.782907 | 8.670947 | 0.001796 | CK473706     |                      |
| A_44_P100740  | -0.783096 | 12.38389 | 0.005403 | NM_001024243 | Nudt3                |
| A_44_P386515  | -0.783243 | 9.980967 | 0.006867 | NM_001008771 | Wdr77                |
| A_44_P322960  | -0.783753 | 12.49027 | 0.000134 | NM_022532    | Araf                 |
| A_44_P759589  | -0.783856 | 12.06586 | 0.002218 | CF110322     |                      |
| A_44_P452668  | -0.783988 | 8.976903 | 0.000605 | XM_342731    | Sumf1_predicted      |
| A_44_P356468  | -0.784919 | 10.14415 | 0.002477 | XR_007829    | RGD1561940_predicted |
| A_44_P283971  | -0.785012 | 9.049607 | 0.000234 | XM_232972    | Zfp189_predicted     |
| A_43_P19994   | -0.785178 | 9.365389 | 0.000868 | XM_233485    | Rlf_predicted        |
| A_43_P20118   | -0.785793 | 10.4862  | 0.008255 | BC099746     | Suclg2               |
| A_43_P21464   | -0.78587  | 9.177944 | 0.006099 | XM_233220    | LOC313391            |
| A_44_P382523  | -0.786011 | 10.81879 | 0.009434 | XM_236376    | RGD1311958_predicted |
| A_44_P344425  | -0.786114 | 9.781851 | 0.004082 | XM_224538    | Dock9                |
| A_44_P1039444 | -0.786386 | 8.248205 | 0.007048 | NM_032613    | Lasp1                |
| A_44_P326090  | -0.786522 | 11.3645  | 0.001936 | XM_342312    | Ahcyl1_predicted     |
| A_44_P425380  | -0.786802 | 12.00819 | 2.62E-05 | NM_001011991 | Ndrp1                |
| A_44_P480240  | -0.786957 | 9.61964  | 0.007872 | NM_019182    | Rnf4                 |
| A_44_P831218  | -0.788899 | 12.51332 | 0.008455 | CK596627     |                      |
| A_43_P23188   | -0.789235 | 8.984787 | 0.006612 | XM_001053087 | LOC678766            |
| A_44_P422271  | -0.789537 | 10.07162 | 0.000428 | XM_217019    | Cerk_predicted       |
| A_44_P825629  | -0.789986 | 8.743667 | 0.004918 |              |                      |
| A_44_P966141  | -0.790387 | 10.67786 | 0.004458 | CO399145     |                      |
| A_44_P501082  | -0.790871 | 10.12628 | 0.008074 | NM_134346    | Rap1b                |
| A_44_P367698  | -0.791355 | 8.877036 | 0.005434 | NM_031720    | Dio2                 |
| A_43_P10511   | -0.792255 | 11.50748 | 0.00296  | XM_342289    |                      |
| A_44_P340393  | -0.792382 | 10.64778 | 5.48E-05 | XR_009391    | RGD1565753_predicted |
| A_44_P246128  | -0.792787 | 10.07023 | 0.006945 | XM_576696    | LOC501281            |
| A_44_P168102  | -0.792962 | 11.70241 | 0.009798 | NM_031729    | Ppp5c                |
| A_43_P17837   | -0.792995 | 10.48533 | 0.004349 | XM_215423    | Sesn1_predicted      |
| A_43_P18051   | -0.793458 | 9.698695 | 0.001821 | XM_001054856 | LOC679203            |
| A_44_P536676  | -0.793756 | 10.54809 | 0.005142 | NM_001013158 | B3galt3              |
| A_44_P506374  | -0.794243 | 8.661933 | 0.001863 | XM_001073596 | Nyw1                 |
| A_44_P553939  | -0.794537 | 10.15677 | 0.003392 | BG667845     |                      |
| A_44_P149954  | -0.794596 | 9.399586 | 0.00696  | XM_576917    | RGD1562289_predicted |
| A_44_P324452  | -0.794638 | 10.7937  | 0.004997 | NM_001048184 | Rragc_predicted      |
| A_44_P1029770 | -0.795192 | 11.5724  | 0.002588 | NM_001025732 | Nol5a                |
| A_44_P485246  | -0.795505 | 11.15076 | 0.000209 | XR_006015    | LOC296593            |
| A_43_P21256   | -0.79594  | 9.616947 | 0.007425 | NM_001083966 | Rev3l                |
| A_44_P764308  | -0.796777 | 12.43124 | 0.002224 |              |                      |
| A_44_P1008284 | -0.797081 | 11.05187 | 0.000467 |              |                      |
| A_44_P500250  | -0.797368 | 10.23157 | 0.007857 | XM_343404    | RGD1565253_predicted |

|              |           |          |          |              |                      |
|--------------|-----------|----------|----------|--------------|----------------------|
| A_44_P380157 | -0.797475 | 13.15193 | 0.004485 | XM_001074009 | LOC690298            |
| A_44_P539738 | -0.798034 | 8.898049 | 0.007117 | NM_022862    | Unc13b               |
| A_44_P268837 | -0.800875 | 14.91321 | 0.002766 | NM_001013923 | LOC296318            |
| A_44_P536282 | -0.801147 | 14.54553 | 0.000242 | NM_001013130 | Spnb2                |
| A_44_P506464 | -0.802365 | 11.35145 | 0.003007 | XR_005489    | LOC316483            |
| A_42_P505280 | -0.80242  | 11.65719 | 0.002254 | NM_001012063 | Uble1a               |
| A_43_P16672  | -0.802949 | 11.21939 | 0.002994 | NM_001024800 | Txndc1               |
| A_44_P331164 | -0.804514 | 11.57423 | 0.004321 | NM_001013974 | RGD1308813           |
| A_44_P218229 | -0.805107 | 12.3132  | 0.007585 | XR_006724    | LOC363208            |
| A_44_P806917 | -0.805151 | 8.473763 | 0.001051 |              |                      |
| A_44_P366005 | -0.805172 | 11.03052 | 0.003555 | XR_008061    | RGD1560954_predicted |
| A_44_P387374 | -0.805344 | 9.379108 | 0.003578 | XM_221315    | RGD1309443_predicted |
| A_44_P944991 | -0.805734 | 11.55252 | 0.000681 |              |                      |
| A_44_P335898 | -0.805981 | 9.912098 | 0.003737 | BC097982     |                      |
| A_44_P871871 | -0.807236 | 9.084835 | 0.000161 |              |                      |
| A_44_P987960 | -0.80876  | 11.55567 | 0.002189 | CO398009     |                      |
| A_44_P365155 | -0.809646 | 13.55149 | 0.004859 | NM_012583    | Hprt                 |
| A_44_P410080 | -0.810974 | 9.846895 | 0.007343 | XM_001061719 | RGD1563620_predicted |
| A_43_P13247  | -0.810995 | 9.21568  | 0.004632 | XM_001070141 | Psd                  |
| A_43_P10441  | -0.81137  | 10.65016 | 0.002046 | XM_217149    | RGD1310937_predicted |
| A_44_P558119 | -0.811375 | 8.498026 | 0.004495 | XM_236476    | Elov14_predicted     |
| A_44_P612824 | -0.811468 | 12.84505 | 0.006458 | NM_183326    | Gabra1               |
| A_44_P524981 | -0.811837 | 8.832762 | 0.005526 | NM_024373    | Galnt1               |
| A_43_P13175  | -0.812151 | 9.510029 | 0.003163 | NM_133405    | Cry2                 |
| A_44_P177793 | -0.812473 | 13.2334  | 0.008377 |              |                      |
| A_44_P165692 | -0.813438 | 10.70566 | 0.00093  | NM_001034003 | RGD1308874           |
| A_44_P344421 | -0.814478 | 11.30413 | 0.001612 | XM_224538    | Dock9                |
| A_44_P590197 | -0.815765 | 12.77303 | 0.001655 | AW915353     |                      |
| A_44_P419565 | -0.817066 | 8.767756 | 0.001182 | XM_231128    | RGD1310887_predicted |
| A_43_P10318  | -0.817311 | 9.623956 | 0.009787 | XM_001062954 | Amfr_predicted       |
| A_44_P375593 | -0.817459 | 8.904718 | 0.004004 | XM_001053401 | RGD1305001_predicted |
| A_42_P658005 | -0.817751 | 10.96039 | 0.000808 | XM_573442    | R3hdm1               |
| A_44_P821396 | -0.81801  | 11.14901 | 0.005183 | XM_220013    | RGD1564625_predicted |
| A_44_P297114 | -0.818198 | 9.289671 | 0.000997 | NM_001014226 | RGD1308915           |
| A_43_P10712  | -0.818306 | 11.54703 | 0.000346 | CO385963     |                      |
| A_44_P135148 | -0.818866 | 9.836715 | 0.005412 | NM_130894    | Mfn2                 |
| A_43_P20941  | -0.818953 | 10.36852 | 0.003289 | NM_001009685 | Drg1                 |
| A_44_P114774 | -0.819684 | 8.742619 | 0.003905 | XM_343190    | RGD1563028_predicted |
| A_44_P231724 | -0.8197   | 11.55686 | 0.008186 | XR_009038    | LOC308950            |
| A_44_P287286 | -0.821021 | 9.32241  | 0.004277 | XM_216910    |                      |
| A_44_P589989 | -0.821357 | 11.40158 | 0.006218 | CA339579     |                      |
| A_42_P544887 | -0.823142 | 10.02887 | 0.004302 | NM_031665    | Stx6                 |
| A_44_P509872 | -0.82419  | 9.224376 | 0.006955 | XM_238280    | Stard7_predicted     |
| A_43_P23313  | -0.824556 | 10.73031 | 0.006603 | NM_001006960 | MGC94604             |
| A_44_P637687 | -0.825702 | 12.07551 | 0.004244 | XM_001079537 | RGD1310754_predicted |
| A_44_P476598 | -0.826362 | 13.11167 | 0.00335  | XM_575808    |                      |
| A_44_P471848 | -0.82645  | 9.127431 | 0.002307 | XM_225257    |                      |
| A_44_P560788 | -0.826837 | 14.22944 | 0.001736 | CO566111     |                      |
| A_43_P18579  | -0.827324 | 11.47094 | 0.004409 | XM_231162    | Fbxw2_predicted      |

|               |           |          |          |              |                      |
|---------------|-----------|----------|----------|--------------|----------------------|
| A_44_P507881  | -0.827462 | 10.73166 | 0.005981 | AI502676     |                      |
| A_44_P550412  | -0.827778 | 8.910014 | 0.001253 | AF375874     | Trpm7                |
| A_44_P455174  | -0.830207 | 10.55528 | 0.000725 | NM_001014116 | RGD1307381           |
| A_44_P203682  | -0.830529 | 10.79381 | 0.001988 | XM_215113    | Ptdss2_predicted     |
| A_44_P671835  | -0.830567 | 8.357442 | 0.003606 |              |                      |
| A_44_P259574  | -0.830641 | 14.92661 | 0.004778 | NM_053290    | Pgam1                |
| A_44_P494510  | -0.83076  | 8.47185  | 0.002851 | XM_001068808 |                      |
| A_44_P166777  | -0.831154 | 8.870917 | 0.006837 | XM_574528    | LOC499235            |
| A_44_P920120  | -0.831683 | 10.40844 | 0.002672 | XM_001066536 | LOC686098            |
| A_44_P606516  | -0.83203  | 11.17502 | 0.000829 |              |                      |
| A_44_P209817  | -0.832416 | 9.940716 | 0.000341 | BC078744     | Cav                  |
| A_43_P21088   | -0.83259  | 8.417264 | 0.002447 | XM_229993    | RGD1306214_predicted |
| A_44_P274491  | -0.832886 | 11.54702 | 0.004151 | XM_341645    | Large_predicted      |
| A_44_P141513  | -0.833535 | 11.4231  | 0.003774 | NM_001014175 | LOC361990            |
| A_44_P123908  | -0.833932 | 9.166325 | 0.008822 | XM_342338    | RGD1311435           |
| A_43_P18107   | -0.834743 | 10.78105 | 0.002496 | XR_008372    | RGD1307034_predicted |
| A_44_P432432  | -0.835275 | 9.693417 | 0.002327 | NM_013151    | Plat                 |
| A_43_P10854   | -0.8356   | 9.558071 | 0.007977 | NM_001011934 | Hbs1l                |
| A_44_P124225  | -0.835726 | 11.15481 | 0.002671 | NM_001025701 | MGC116373            |
| A_44_P852513  | -0.835811 | 13.01714 | 0.00087  | XR_005712    | LOC366544            |
| A_44_P883146  | -0.835885 | 9.733681 | 0.001575 | NM_001007682 | Thtpa                |
| A_43_P10831   | -0.836254 | 9.547403 | 0.00254  | NM_001013207 | Rnpc2                |
| A_44_P662685  | -0.836691 | 8.319404 | 0.00219  | NM_001025046 | LOC500102            |
| A_44_P540542  | -0.836969 | 8.683687 | 0.004265 | XM_001054154 | Myef2                |
| A_44_P720404  | -0.837213 | 9.667063 | 0.004071 | XM_231564    | RGD1564895_predicted |
| A_44_P963185  | -0.838192 | 12.09844 | 0.001448 | AB014879     |                      |
| A_44_P226881  | -0.839542 | 12.48466 | 0.00757  | NM_031079    | Pde2a                |
| A_44_P177807  | -0.839994 | 8.88638  | 0.000103 | NM_023090    | Epas1                |
| A_44_P511049  | -0.840182 | 10.80784 | 0.001527 | XM_224947    | Prosc_predicted      |
| A_44_P974681  | -0.840279 | 10.35346 | 0.001809 | XM_575362    | RGD1562992_predicted |
| A_43_P17622   | -0.84034  | 9.765676 | 0.000235 | XM_345870    | Lass5_predicted      |
| A_44_P794598  | -0.840375 | 12.69006 | 0.003716 | NM_198132    | Hnrpa3               |
| A_44_P621980  | -0.840874 | 11.64749 | 0.007824 | M31178       |                      |
| A_44_P163645  | -0.841165 | 12.14695 | 0.000501 | NM_001014135 | Wdr1                 |
| A_43_P10843   | -0.842047 | 9.483842 | 0.005797 | XM_342312    | Ahcy1l_predicted     |
| A_44_P856158  | -0.842088 | 8.219854 | 0.000446 | XM_001058383 | RGD1559576_predicted |
| A_44_P680369  | -0.842217 | 8.724026 | 0.000689 | BF545930     |                      |
| A_44_P487562  | -0.843181 | 7.793448 | 0.001154 | NM_001039023 | Net1                 |
| A_43_P15854   | -0.843798 | 9.295432 | 0.002712 | XM_227134    |                      |
| A_44_P241862  | -0.844188 | 9.094338 | 0.002739 | NM_022615    | Top1                 |
| A_44_P403415  | -0.84445  | 8.996061 | 0.001818 | XM_343301    | Mpped1_predicted     |
| A_44_P543548  | -0.844926 | 9.422296 | 0.002666 | NM_057119    | Sfrs10               |
| A_44_P1039760 | -0.844948 | 9.985154 | 0.009284 | NM_001013228 | Tcte1l               |
| A_44_P249164  | -0.845962 | 13.33993 | 0.004086 | NM_031028    | Gabbr1               |
| A_43_P15265   | -0.847874 | 13.38868 | 0.000515 | NM_017042    | Ppp3cb               |
| A_44_P242781  | -0.848486 | 9.029121 | 0.001246 | DY308836     |                      |
| A_44_P501483  | -0.850384 | 14.38167 | 0.000633 | XR_006667    | LOC310385            |
| A_44_P475744  | -0.850696 | 11.65921 | 0.005254 | XM_215524    | Tpd52_predicted      |
| A_44_P151399  | -0.851778 | 10.08971 | 0.003203 | NM_198737    | Arl6ip1              |

|              |           |          |          |              |                      |
|--------------|-----------|----------|----------|--------------|----------------------|
| A_44_P112788 | -0.852687 | 8.668467 | 0.000613 | NM_021850    | Bcl2l2               |
| A_42_P693042 | -0.85293  | 10.92209 | 0.001492 | XM_214555    | RGD1312005_predicted |
| A_44_P932876 | -0.85312  | 10.2437  | 0.005947 | NM_001014239 | LOC364637            |
| A_42_P713975 | -0.853185 | 14.00655 | 0.007192 | BC082799     | LOC499779            |
| A_43_P10213  | -0.854676 | 11.58924 | 0.003286 | XM_232515    | Etnk1_predicted      |
| A_44_P323496 | -0.857383 | 9.456808 | 0.001818 | NM_019311    | Inpp5d               |
| A_44_P322590 | -0.858927 | 11.83874 | 0.004295 | NM_057211    | Klf9                 |
| A_44_P243701 | -0.859383 | 12.2999  | 0.007041 | XM_578871    |                      |
| A_44_P753384 | -0.860601 | 10.44877 | 0.001563 |              |                      |
| A_44_P319042 | -0.861633 | 10.52504 | 0.000626 | XM_231798    | Kbtbd2_predicted     |
| A_44_P342586 | -0.862131 | 9.340877 | 0.002361 | NM_001014019 | LOC308650            |
| A_44_P425367 | -0.86303  | 13.09488 | 0.005032 | NM_001024332 | LOC500282            |
| A_44_P759588 | -0.864571 | 12.31002 | 0.000475 | CF110322     |                      |
| A_44_P667768 | -0.86515  | 10.03546 | 0.002647 |              |                      |
| A_44_P520324 | -0.865344 | 14.543   | 0.001973 | XM_213911    |                      |
| A_44_P342657 | -0.867773 | 9.773441 | 0.0038   | XM_233792    | Vps13d_predicted     |
| A_44_P534374 | -0.867883 | 9.892686 | 0.00205  | XM_227614    | Extl2                |
| A_44_P199420 | -0.86915  | 10.28286 | 0.002966 | XM_235924    | RGD1309188_predicted |
| A_42_P522171 | -0.869716 | 9.111699 | 0.004987 | XM_001081512 | RGD1307966_predicted |
| A_44_P930764 | -0.870367 | 8.618998 | 0.001655 | NM_001013125 | Bfar                 |
| A_44_P145549 | -0.870394 | 8.732414 | 0.001413 | NM_019182    | Rnf4                 |
| A_44_P230875 | -0.870405 | 12.33114 | 0.004182 | BF567478     |                      |
| A_42_P545928 | -0.871064 | 9.551304 | 0.007959 | NM_153730    | Klhl12               |
| A_44_P233569 | -0.871688 | 11.89088 | 0.000435 | NM_031770    | Gnb5                 |
| A_44_P198535 | -0.874525 | 8.467903 | 0.000164 | NM_057103    | Akap12               |
| A_44_P975286 | -0.875152 | 9.924327 | 0.000359 | CO403766     |                      |
| A_44_P944912 | -0.876799 | 10.35114 | 0.002205 |              |                      |
| A_44_P362541 | -0.87682  | 10.72609 | 0.00118  | NM_001013235 | Scoc                 |
| A_44_P283715 | -0.876952 | 9.429911 | 0.006233 | XM_223664    | Ehbp1_predicted      |
| A_44_P219796 | -0.879236 | 13.31127 | 0.003461 | XM_230038    | Nckap1               |
| A_44_P102628 | -0.880199 | 12.04884 | 0.00607  | NM_021688    | Kcnk1                |
| A_44_P548507 | -0.882136 | 14.00466 | 0.006965 | NM_032083    | Chn1                 |
| A_44_P471440 | -0.882876 | 9.075809 | 0.004845 | NM_001024765 | Nbr1                 |
| A_44_P476663 | -0.88324  | 9.22413  | 0.001022 | XM_344277    | Asb3_predicted       |
| A_44_P465329 | -0.885403 | 13.18839 | 0.00018  | NM_012798    | Mal                  |
| A_44_P157167 | -0.88618  | 11.39183 | 0.001068 | NM_001008324 | Eif4b                |
| A_43_P17496  | -0.887473 | 9.19712  | 0.008464 | XM_231176    | Rbm18_predicted      |
| A_44_P137247 | -0.891594 | 10.70451 | 0.002241 | NM_001025142 | Trim35               |
| A_44_P438744 | -0.892502 | 9.47676  | 0.001538 | XM_233718    |                      |
| A_44_P112050 | -0.893598 | 8.93452  | 0.002972 | XM_573428    | RGD1560523_predicted |
| A_44_P895660 | -0.893805 | 9.179857 | 0.009931 | AW916954     |                      |
| A_43_P17964  | -0.893859 | 9.14457  | 0.001186 | NM_001007662 | Arcn1                |
| A_44_P393929 | -0.894308 | 9.800587 | 0.002936 | NM_001039713 | RGD1305121_predicted |
| A_44_P207721 | -0.894337 | 8.940166 | 0.006695 | XM_222946    | Adss_predicted       |
| A_44_P267724 | -0.895152 | 8.893436 | 0.008978 | XM_217022    | Kif21a_predicted     |
| A_44_P512255 | -0.895159 | 12.15255 | 0.006149 | NM_017214    | Rgs4                 |
| A_44_P354208 | -0.896039 | 10.41378 | 0.007776 | XM_232315    | Rasgef1a_predicted   |
| A_44_P860400 | -0.896072 | 10.18175 | 0.002993 | CK839443     | LOC680003            |
| A_44_P344273 | -0.897967 | 11.44876 | 0.002233 | NM_001034129 | Tloc1                |

|              |           |          |          |              |                      |
|--------------|-----------|----------|----------|--------------|----------------------|
| A_44_P948202 | -0.899553 | 11.85151 | 8.66E-05 |              |                      |
| A_44_P463759 | -0.899619 | 8.247009 | 6.28E-05 | XM_235609    | Prickle1             |
| A_44_P667548 | -0.89963  | 13.34538 | 0.004697 |              |                      |
| A_44_P918128 | -0.901601 | 9.504957 | 0.002334 |              |                      |
| A_44_P233742 | -0.902752 | 10.44578 | 0.000809 | NM_001004090 | Tspan5               |
| A_44_P409694 | -0.903718 | 11.87361 | 0.002481 | XM_343604    | Serpine2             |
| A_44_P232642 | -0.905716 | 10.50494 | 0.006499 | NM_001008301 | Usp14                |
| A_44_P121401 | -0.909039 | 9.597854 | 0.000594 | XM_237998    |                      |
| A_44_P356078 | -0.912182 | 10.7963  | 0.000877 | NM_017033    | Pgm1                 |
| A_44_P157604 | -0.912277 | 9.631781 | 0.005396 | DY315019     | RGD1565556_predicted |
| A_44_P745191 | -0.913003 | 11.38851 | 0.002981 | CF978988     | Prkacb               |
| A_43_P11416  | -0.913741 | 11.3789  | 0.004315 | XM_225625    | Gpr158_predicted     |
| A_44_P158973 | -0.914102 | 9.52898  | 0.001232 | NM_001013046 | Rab35                |
| A_43_P21122  | -0.916898 | 11.25123 | 0.000669 | XM_341882    | Sytl2_predicted      |
| A_44_P552865 | -0.917112 | 12.17696 | 0.002942 | XM_221896    | LOC304280            |
| A_44_P147509 | -0.91732  | 11.89346 | 0.000271 | NM_199412    | Cbara1               |
| A_43_P13702  | -0.919716 | 10.92545 | 0.003644 | NM_001025136 | Clp1                 |
| A_44_P492153 | -0.91998  | 8.651813 | 0.004016 | XM_224271    | Mtmr6_predicted      |
| A_43_P10791  | -0.921154 | 10.07704 | 0.001537 | CB547648     |                      |
| A_43_P12189  | -0.922647 | 11.87634 | 0.007109 | NM_022262    | Tsnax                |
| A_44_P526933 | -0.922673 | 11.59775 | 0.001857 | NM_053357    | Ctnnb1               |
| A_43_P10856  | -0.922774 | 9.374146 | 0.006399 | XM_001077761 |                      |
| A_44_P415115 | -0.923459 | 11.48848 | 0.003641 | XM_345660    |                      |
| A_44_P221077 | -0.92647  | 11.11792 | 0.007184 | NM_001017479 | MGC108778            |
| A_44_P505932 | -0.927578 | 9.684475 | 0.000221 | NM_021868    | Cttn                 |
| A_44_P469394 | -0.927674 | 10.95975 | 0.000659 | NM_022217    | Amph1                |
| A_44_P409339 | -0.931009 | 8.033903 | 0.005822 | NM_053357    | Ctnnb1               |
| A_44_P621820 | -0.933715 | 11.95108 | 0.002175 | XR_005838    | LOC501532            |
| A_44_P349309 | -0.936479 | 10.88574 | 0.007826 | XM_223327    |                      |
| A_44_P269752 | -0.937257 | 12.53318 | 0.005391 | XM_341581    | Rnf125_predicted     |
| A_44_P261326 | -0.937683 | 9.315438 | 0.003697 | XM_342782    | Golt1b_predicted     |
| A_44_P278639 | -0.938965 | 9.436573 | 0.003089 | NM_053693    | Dmtf1                |
| A_44_P210563 | -0.939523 | 11.39399 | 0.003864 | NM_012578    | H1f0                 |
| A_44_P443976 | -0.939799 | 8.653178 | 0.003824 | NM_031697    | St3gal3              |
| A_44_P868060 | -0.940038 | 9.085655 | 0.000327 | XR_005433    |                      |
| A_44_P143974 | -0.940953 | 12.80713 | 0.001732 | NM_001013235 | Scoc                 |
| A_43_P21660  | -0.941041 | 10.4107  | 0.000164 | NM_001007147 | Unc84a               |
| A_43_P18787  | -0.9414   | 9.262463 | 0.002095 | XM_342552    | Ncoa6                |
| A_44_P115461 | -0.942682 | 9.245119 | 0.007063 | NM_017007    | Gad1                 |
| A_44_P410062 | -0.943971 | 12.47318 | 0.001655 | XR_005977    | LOC290503            |
| A_43_P17406  | -0.945546 | 9.715528 | 0.001908 | NM_001005541 | Vps16                |
| A_44_P794770 | -0.94696  | 10.27504 | 0.004338 | NM_133560    | Trak2                |
| A_44_P973796 | -0.947016 | 11.59966 | 0.004459 | DY319575     |                      |
| A_43_P10574  | -0.947419 | 9.88833  | 0.000371 | NM_001012012 | Snx11                |
| A_44_P164287 | -0.947676 | 8.473386 | 0.000485 | NM_001013925 | Nub1                 |
| A_44_P427089 | -0.948337 | 11.95941 | 0.000863 | XM_341008    |                      |
| A_44_P606344 | -0.948971 | 10.54105 | 0.003253 | XM_343550    | RGD1310392_predicted |
| A_44_P356876 | -0.950631 | 8.529601 | 8.67E-05 | NM_001039002 | RGD1304790           |
| A_44_P113842 | -0.951642 | 8.328451 | 0.001042 | NM_022210    | Max                  |

|              |           |          |          |              |                      |
|--------------|-----------|----------|----------|--------------|----------------------|
| A_44_P365516 | -0.952073 | 14.32874 | 0.00153  | BC059146     | Tgfb1i4              |
| A_43_P10725  | -0.952393 | 10.57854 | 0.006304 | NM_001012468 | Rab18                |
| A_43_P16458  | -0.956172 | 13.35345 | 0.001088 | NM_001011992 | Atp6v1c1             |
| A_44_P433334 | -0.957339 | 9.778173 | 0.001503 | NM_001012197 | Tra1_predicted       |
| A_44_P466489 | -0.957393 | 10.38779 | 0.005784 | NM_001007642 | MGC93920             |
| A_44_P413294 | -0.958499 | 10.65194 | 0.004919 | NM_022864    | Cplx1                |
| A_44_P288796 | -0.958543 | 9.77281  | 0.001562 | NM_001013125 | Bfar                 |
| A_44_P609842 | -0.959053 | 9.079842 | 0.006878 |              |                      |
| A_44_P822078 | -0.959623 | 10.3268  | 0.002286 | XM_576832    | LOC501422            |
| A_44_P984248 | -0.959633 | 8.922284 | 0.000801 | XM_222785    | Astn1                |
| A_42_P832417 | -0.959872 | 14.31019 | 0.001339 | NM_012686    | Vsnl1                |
| A_44_P317520 | -0.960089 | 11.88639 | 0.000868 | BC079339     | Atp6ap2              |
| A_44_P286573 | -0.96102  | 9.659496 | 0.000623 | AA955833     |                      |
| A_43_P11752  | -0.964338 | 10.8451  | 0.0015   | NM_013198    | Maob                 |
| A_44_P342908 | -0.965246 | 10.98916 | 0.000306 | NM_001012076 | Phyhipl              |
| A_43_P17784  | -0.966917 | 10.40971 | 0.000967 | NM_001025722 | Cdk10                |
| A_44_P487021 | -0.967089 | 11.75454 | 0.004192 | NM_001002830 | Rasl11b              |
| A_44_P698487 | -0.967251 | 11.0701  | 0.003175 | XR_007600    | LOC501341            |
| A_44_P776000 | -0.967895 | 12.74713 | 0.001375 | XM_001061754 |                      |
| A_44_P196757 | -0.968211 | 10.26993 | 0.002441 | XM_224256    | Sacs_predicted       |
| A_44_P764653 | -0.968498 | 9.566406 | 0.000695 | CO559017     |                      |
| A_44_P166396 | -0.969982 | 9.102654 | 0.000579 | XM_216348    | RGD1311622_predicted |
| A_44_P111368 | -0.970396 | 10.00032 | 0.005783 | NM_001037356 | MGC125015            |
| A_44_P191903 | -0.971317 | 9.005184 | 0.000774 | NM_053693    | Dmtf1                |
| A_44_P625415 | -0.971557 | 14.28528 | 0.000403 | XM_220333    | Cyfip2_predicted     |
| A_44_P237886 | -0.97168  | 14.67145 | 0.009105 | NM_031353    | Vdac1                |
| A_44_P318891 | -0.973557 | 14.13979 | 0.004502 | XR_007422    | RGD1561111_predicted |
| A_44_P248541 | -0.974703 | 10.35557 | 0.004283 | NM_001014263 | Sypl                 |
| A_44_P111959 | -0.974894 | 8.187997 | 3.11E-06 | BC087709     | Slc15a4              |
| A_44_P187827 | -0.975297 | 10.99753 | 0.00531  | XM_213437    | Spop                 |
| A_44_P156439 | -0.976221 | 9.753425 | 0.00196  | XM_344861    | Trim28               |
| A_44_P193210 | -0.979059 | 10.75687 | 0.005774 | AY724483     | LOC690163            |
| A_44_P114023 | -0.979827 | 9.12418  | 0.002735 | NM_001047972 | LOC501706            |
| A_44_P501593 | -0.981285 | 9.661811 | 0.001256 | XM_230773    | Acss2_predicted      |
| A_44_P555525 | -0.983285 | 11.03448 | 0.008015 | NM_001007625 | Epdr2                |
| A_44_P347007 | -0.985732 | 9.112875 | 0.005147 | XM_001058095 |                      |
| A_44_P290231 | -0.991312 | 15.26656 | 0.005277 | NM_013013    | Psap                 |
| A_44_P201511 | -0.991781 | 8.903813 | 0.000151 | NM_001012087 | Mar.07               |
| A_44_P386840 | -0.992813 | 13.26252 | 0.003197 | NM_001013209 | Dnajb6               |
| A_44_P401170 | -0.994067 | 10.95804 | 0.005615 | NM_001025014 | Tmem50b              |
| A_44_P328311 | -0.995783 | 13.29344 | 0.004944 | XR_007180    | LOC499261            |
| A_44_P149161 | -0.99613  | 10.26854 | 0.007722 | NM_198738    | Psat1                |
| A_44_P238710 | -0.997814 | 8.468174 | 0.000807 | XM_218747    | Tjp1_predicted       |
| A_43_P10867  | -1.00068  | 9.238465 | 0.001962 | CB547678     |                      |
| A_44_P239095 | -1.001923 | 11.38682 | 0.000538 | XM_223440    | RGD1564407_predicted |
| A_43_P15490  | -1.002544 | 11.39528 | 0.000103 | NM_134377    | Clstn2               |
| A_44_P123898 | -1.002823 | 10.07004 | 0.003245 | XM_341452    |                      |
| A_44_P214054 | -1.004151 | 11.25551 | 0.008879 | NM_031722    | Tmed2                |
| A_44_P162099 | -1.004188 | 9.388554 | 0.002809 | NM_053296    | Glrp                 |



|              |           |          |          |              |                      |
|--------------|-----------|----------|----------|--------------|----------------------|
| A_43_P15623  | -1.004336 | 10.74371 | 0.001195 | NM_053414    | Ddx1                 |
| A_44_P479520 | -1.00546  | 10.10051 | 0.003832 | XM_341907    | Eif4g2_predicted     |
| A_44_P905187 | -1.005469 | 11.47995 | 0.002067 | XM_233231    | Dnajc6_predicted     |
| A_44_P170309 | -1.006565 | 8.625744 | 0.000217 | XM_001064372 | RGD1562407_predicted |
| A_44_P950583 | -1.008831 | 9.836371 | 0.002687 | CO396335     |                      |
| A_44_P500906 | -1.010881 | 9.936269 | 0.004815 | NM_012788    | Dlgh1                |
| A_44_P912711 | -1.012212 | 11.21529 | 0.004315 | XM_224429    | Pcdh9_predicted      |
| A_44_P929345 | -1.012916 | 10.90634 | 0.001278 | XM_576703    | LOC681644            |
| A_44_P426919 | -1.013338 | 12.66231 | 0.005288 | XM_345601    |                      |
| A_44_P328121 | -1.016958 | 10.3368  | 0.006076 | NM_057207    | Sv2b                 |
| A_44_P978901 | -1.017263 | 10.12303 | 0.00224  | XM_218747    | Tjp1_predicted       |
| A_44_P296084 | -1.020161 | 9.707363 | 0.000465 | CB544459     |                      |
| A_44_P159296 | -1.020721 | 10.10136 | 0.007064 | NM_001013929 | Atp6v1h              |
| A_44_P100991 | -1.020722 | 10.01432 | 0.001454 | XM_220404    | RGD1310352           |
| A_44_P519174 | -1.021111 | 10.15332 | 0.000319 | NM_001015027 | Crebl2               |
| A_44_P320955 | -1.023289 | 9.428457 | 0.003607 | NM_001012213 | Sfxn1                |
| A_44_P231994 | -1.023305 | 9.89084  | 0.000809 | XM_231626    | Slc37a3_predicted    |
| A_44_P183241 | -1.023585 | 9.310267 | 0.005435 | XM_221333    | Bcl6_predicted       |
| A_43_P16889  | -1.025905 | 10.09083 | 0.002697 | XM_220636    | RGD1307929           |
| A_44_P131031 | -1.026384 | 15.044   | 0.002092 | XR_006475    | LOC499479            |
| A_44_P428872 | -1.027036 | 8.76117  | 0.007642 | XM_341137    |                      |
| A_44_P769703 | -1.029805 | 8.731323 | 0.004312 | NM_178096    | Nrep                 |
| A_42_P843366 | -1.030639 | 9.593706 | 0.001143 | NM_022681    | Adnp                 |
| A_44_P394401 | -1.035642 | 9.837967 | 8.60E-05 | XM_230531    | Disp2_predicted      |
| A_44_P269675 | -1.039368 | 9.460818 | 0.006258 | XM_001065667 | LOC685894            |
| A_44_P251692 | -1.042788 | 12.91922 | 0.00797  | NM_019257    | Sfrs5                |
| A_43_P15601  | -1.043059 | 9.276099 | 0.00032  | NM_134351    | Mat2a                |
| A_44_P118993 | -1.045783 | 9.558989 | 0.00415  | NM_134351    | Mat2a                |
| A_44_P108728 | -1.052343 | 9.228743 | 0.005081 | CA512164     |                      |
| A_44_P356658 | -1.052781 | 8.23732  | 0.000364 | XM_219716    | Pdzd4_predicted      |
| A_44_P433568 | -1.055139 | 10.05306 | 0.008337 | XM_341882    | Sytl2_predicted      |
| A_44_P420005 | -1.060142 | 10.64892 | 0.001587 | NM_001047897 | LOC360618            |
| A_44_P110392 | -1.062312 | 10.29743 | 0.009783 |              |                      |
| A_44_P917564 | -1.062494 | 13.42654 | 0.000786 | NM_001044282 | MGC94725             |
| A_44_P790861 | -1.062642 | 8.940687 | 0.001409 |              |                      |
| A_44_P189326 | -1.066924 | 12.61675 | 0.00045  | NM_017319    | Pdia3                |
| A_44_P215393 | -1.067533 | 11.4316  | 0.006142 | NM_001025129 | RGD1306327           |
| A_44_P109887 | -1.069138 | 12.16077 | 0.005229 | XM_214007    | Ccni_predicted       |
| A_42_P509365 | -1.069294 | 12.67278 | 0.005048 | NM_031140    | Vim                  |
| A_44_P374848 | -1.069632 | 10.04428 | 0.000273 | NM_024139    | Chp                  |
| A_44_P354008 | -1.072481 | 9.573272 | 0.001294 | XM_224429    | Pcdh9_predicted      |
| A_44_P482267 | -1.073559 | 9.237502 | 0.005217 | NM_134382    | Elovl5               |
| A_43_P16591  | -1.075943 | 9.78436  | 0.001714 | AY724483     | LOC690163            |
| A_44_P461470 | -1.077919 | 9.689354 | 0.000273 | NM_053714    | Ank                  |
| A_44_P699787 | -1.077996 | 9.30303  | 0.000781 | XM_221369    | Senp5_predicted      |
| A_44_P443138 | -1.080637 | 14.64915 | 0.002534 | XM_001054273 | RGD1561628_predicted |
| A_44_P116904 | -1.081159 | 12.77852 | 0.000733 | XM_225314    | Vmp_predicted        |
| A_43_P11707  | -1.081189 | 10.4956  | 0.000904 | NM_013090    | Vamp1                |
| A_44_P484826 | -1.081737 | 10.2743  | 0.002837 | NM_017276    | Gdi2                 |

|              |           |          |          |              |                      |
|--------------|-----------|----------|----------|--------------|----------------------|
| A_44_P856083 | -1.082793 | 9.886582 | 0.001193 |              |                      |
| A_44_P732939 | -1.088751 | 9.200086 | 0.008222 | XM_220269    |                      |
| A_44_P828123 | -1.088815 | 11.76102 | 0.002066 | CO393245     |                      |
| A_44_P687063 | -1.094545 | 8.473641 | 0.009149 |              |                      |
| A_43_P16511  | -1.100214 | 9.35087  | 0.008189 | NM_001044300 | MGC112715            |
| A_44_P651866 | -1.100887 | 9.020218 | 0.000955 | XR_009004    | RGD1560288_predicted |
| A_44_P846589 | -1.104643 | 10.63952 | 0.002532 | NM_022229    | Hspd1                |
| A_44_P109862 | -1.106694 | 10.03475 | 2.72E-05 | NM_001047085 | lvns1abp_predicted   |
| A_44_P141351 | -1.119344 | 15.11579 | 0.0025   | AY035551     |                      |
| A_44_P855981 | -1.121351 | 8.017247 | 0.002263 |              |                      |
| A_44_P110158 | -1.123021 | 9.375679 | 0.000752 | XM_232077    | Ctnna2_predicted     |
| A_44_P433542 | -1.126    | 9.254163 | 0.007077 | NM_198132    | Hnrpa3               |
| A_44_P112641 | -1.127383 | 10.04735 | 7.45E-05 | XM_221214    | RGD1304570_predicted |
| A_44_P108982 | -1.131107 | 11.66852 | 0.004792 | XM_341354    | Sucla2_predicted     |
| A_44_P283366 | -1.131551 | 9.4448   | 0.000311 | NM_181081    | Myst2                |
| A_44_P379420 | -1.132617 | 14.026   | 9.91E-05 | NM_017088    | Gdi1                 |
| A_44_P903850 | -1.134347 | 12.62073 | 0.009738 | NM_001042621 | Pip5k1a_predicted    |
| A_44_P419757 | -1.136875 | 11.96629 | 0.000772 | XM_346210    |                      |
| A_44_P187144 | -1.144151 | 10.41503 | 0.001052 | NM_080896    | Hnrph1               |
| A_44_P205301 | -1.144216 | 11.84258 | 0.000678 | NM_183402    | Grin1a               |
| A_44_P281435 | -1.148942 | 12.47708 | 0.000275 | NM_001013923 | LOC296318            |
| A_44_P206284 | -1.150263 | 8.977071 | 0.000717 | XM_217496    | RGD1566215_predicted |
| A_44_P458704 | -1.158889 | 15.178   | 0.000227 | NM_017073    | Glul                 |
| A_44_P426808 | -1.161242 | 10.50081 | 0.000721 | NM_001013033 | Tspyl                |
| A_42_P828898 | -1.169638 | 9.093417 | 0.000622 | XM_219958    | RGD1305793           |
| A_43_P21284  | -1.177773 | 9.659302 | 0.00667  | NM_001012072 | Ppp1r3c              |
| A_44_P365598 | -1.181633 | 10.34801 | 0.000439 | NM_001012060 | Rnf146               |
| A_44_P554271 | -1.182362 | 9.892054 | 0.003047 | NM_001012235 | Impact               |
| A_43_P22174  | -1.189049 | 9.629683 | 7.01E-05 | NM_001014135 | Wdr1                 |
| A_44_P549445 | -1.189998 | 10.69697 | 0.001182 | NM_130755    | Cs                   |
| A_44_P149114 | -1.190204 | 13.43588 | 0.007867 | NM_057213    | Atp6v1b2             |
| A_43_P12430  | -1.191741 | 9.018875 | 0.001834 | NM_024374    | Mtpn                 |
| A_43_P11881  | -1.195272 | 14.19091 | 1.92E-05 | NM_017253    | Bcat1                |
| A_44_P112597 | -1.196669 | 10.69711 | 0.001391 | XM_220423    | Sept8_predicted      |
| A_44_P196717 | -1.210552 | 10.03627 | 0.007336 | XM_344970    | Stk32c_predicted     |
| A_44_P496496 | -1.216847 | 9.512697 | 0.001327 | XM_342857    | Sh3gl2               |
| A_44_P852695 | -1.230847 | 12.96167 | 0.002981 | XR_007221    | LOC367738            |
| A_44_P594455 | -1.232739 | 10.56054 | 0.002363 | XM_341907    | Eif4g2_predicted     |
| A_43_P10894  | -1.237647 | 10.40303 | 0.000796 | NM_001025635 | Nars                 |
| A_44_P409336 | -1.242365 | 13.4477  | 0.002121 | U56261       |                      |
| A_44_P555389 | -1.243916 | 11.1337  | 0.005838 | NM_138839    | Tmem49               |
| A_43_P12816  | -1.246149 | 9.601757 | 0.006035 | U45479       | Synj1                |
| A_44_P550364 | -1.247556 | 13.63787 | 0.00729  | NM_080697    | Dynll2               |
| A_44_P538779 | -1.250005 | 12.36209 | 0.003068 | NM_001017385 | Kdelr1               |
| A_44_P625348 | -1.263318 | 12.04507 | 0.004999 |              |                      |
| A_43_P11613  | -1.272921 | 11.1712  | 0.007455 | NM_012903    | Anp32a               |
| A_44_P992854 | -1.285168 | 11.73082 | 0.002797 | NM_057132    | Rhoa                 |
| A_44_P480605 | -1.285189 | 13.4398  | 0.003088 | XM_001066230 | LOC291543            |
| A_44_P243145 | -1.291999 | 10.89005 | 0.001388 | NM_021748    | Nsf                  |

|               |           |          |          |              |                      |
|---------------|-----------|----------|----------|--------------|----------------------|
| A_44_P1040736 | -1.294283 | 14.45449 | 0.000396 | NM_199384    | Laptm4a              |
| A_44_P196625  | -1.300095 | 11.39929 | 0.003723 | XM_222253    |                      |
| A_43_P18282   | -1.304967 | 9.017291 | 0.000401 | XM_341483    | RGD1311345           |
| A_44_P858481  | -1.31791  | 9.906794 | 0.000748 |              |                      |
| A_44_P442161  | -1.319289 | 10.07827 | 0.003586 | XM_342405    | Ppp2r4_predicted     |
| A_44_P964633  | -1.334951 | 9.974101 | 0.001176 | CO393123     |                      |
| A_44_P104976  | -1.341226 | 10.14277 | 0.000192 | NM_080583    | Ap2b1                |
| A_44_P515029  | -1.347381 | 11.9698  | 0.004702 | XM_215469    | Map1b                |
| A_44_P293750  | -1.357619 | 10.95115 | 0.001441 | XM_001066493 | Rnf14                |
| A_44_P133044  | -1.366986 | 11.71581 | 0.008077 |              |                      |
| A_44_P338059  | -1.370934 | 9.325555 | 0.000154 | XM_343264    | RGD1562665_predicted |
| A_44_P127156  | -1.375902 | 10.39584 | 0.00155  | M55017       |                      |
| A_44_P480533  | -1.376007 | 10.07984 | 0.000659 |              |                      |
| A_44_P544023  | -1.37978  | 15.59272 | 0.00558  | NM_001011995 | Tuba6                |
| A_44_P902244  | -1.382804 | 10.55446 | 0.002626 | XM_001066493 | Rnf14                |
| A_43_P12839   | -1.392875 | 12.20892 | 0.003602 | NM_053531    | Sybl1                |
| A_44_P198396  | -1.397774 | 12.74067 | 0.004725 | NM_031841    | Scd2                 |
| A_44_P958966  | -1.414575 | 12.88172 | 1.04E-05 | XR_005722    | LOC360902            |
| A_42_P618436  | -1.425871 | 10.82035 | 0.00057  | XM_235689    | RGD1305138_predicted |
| A_44_P213415  | -1.441176 | 12.31949 | 0.001576 | NM_031353    | Vdac1                |
| A_44_P529743  | -1.451843 | 10.57053 | 0.002358 | XM_574587    | RGD1562983_predicted |
| A_44_P107219  | -1.469824 | 12.54211 | 0.003115 | NM_207591    | Gltscr2              |
| A_44_P238314  | -1.485104 | 9.641584 | 0.009513 | NM_019621    | Dlgh4                |
| A_44_P918103  | -1.509247 | 10.93965 | 0.002717 |              |                      |
| A_44_P177434  | -1.512322 | 12.02379 | 0.000964 | NM_178105    | Gpm6a                |
| A_44_P488637  | -1.526402 | 13.0635  | 0.004916 | NM_019351    | Timm17a              |
| A_44_P180786  | -1.563483 | 10.31511 | 0.00123  | XM_217372    | Plekhb2_predicted    |
| A_44_P217648  | -1.66614  | 11.36677 | 0.00039  | NM_001037217 | Mmd2_predicted       |
| A_44_P488022  | -1.667428 | 9.204686 | 1.12E-05 | XM_576451    | LOC501039            |
| A_44_P238312  | -1.676628 | 9.563557 | 0.005752 | NM_019621    | Dlgh4                |
| A_44_P168842  | -1.683993 | 10.19831 | 0.000402 | XR_006947    | LOC300429            |
| A_44_P477322  | -1.696866 | 13.70206 | 0.000621 | NM_031831    | Rtn4                 |
| A_43_P12141   | -1.79599  | 11.19161 | 0.000277 | NM_021869    | Stx7                 |
| A_44_P448181  | -1.799041 | 11.6104  | 0.000186 | AY569014     | Clstn1               |
| A_43_P18735   | -1.800031 | 10.71494 | 0.001217 | NM_001030030 | Cpsf3                |
| A_43_P15367   | -1.835326 | 11.87294 | 0.001591 | NM_139189    | Lmbrd1               |
| A_44_P149148  | -1.923989 | 10.84637 | 0.000345 | NM_017309    | Ppp3r1               |

Table S4

Median: 0.009991979436682584

Geo: 0.013098146982064234

| Term                                            | Count | %      | PValue     |
|-------------------------------------------------|-------|--------|------------|
| GO:0032502~developmental process                | 29    | 24.37% | 0.0019038  |
| GO:0048513~organ development                    | 17    | 14.29% | 0.00264471 |
| GO:0048468~cell development                     | 16    | 13.45% | 0.00365645 |
| GO:0030154~cell differentiation                 | 19    | 15.97% | 0.00467809 |
| GO:0048869~cellular developmental process       | 19    | 15.97% | 0.00467809 |
| GO:0048731~system development                   | 19    | 15.97% | 0.00999198 |
| GO:0007275~multicellular organismal development | 21    | 17.65% | 0.0146788  |
| GO:0048856~anatomical structure development     | 20    | 16.81% | 0.02188862 |
| GO:0007399~nervous system development           | 10    | 8.40%  | 0.03763158 |
| GO:0009653~anatomical structure morphogenesis   | 11    | 9.24%  | 0.09039635 |
| GO:0032501~multicellular organismal process     | 27    | 22.69% | 0.44243405 |

Median: 0.007011150321556307

Geo: 0.01656665519371505

| Term                                        | Count | %      | PValue     |
|---------------------------------------------|-------|--------|------------|
| GO:0065007~biological regulation            | 36    | 30.25% | 0.00358475 |
| GO:0050789~regulation of biological process | 32    | 26.89% | 0.00624207 |
| GO:0050794~regulation of cellular process   | 29    | 24.37% | 0.00778023 |
| GO:0019222~regulation of metabolic process  | 13    | 10.92% | 0.43267287 |

Median: 0.05358450190602306

Geo: 0.03213539348414222

| Term                                                    | Count | %      | PValue     |
|---------------------------------------------------------|-------|--------|------------|
| GO:0048468~cell development                             | 16    | 13.45% | 0.00365645 |
| GO:0030154~cell differentiation                         | 19    | 15.97% | 0.00467809 |
| GO:0048869~cellular developmental process               | 19    | 15.97% | 0.00467809 |
| GO:0016265~death                                        | 11    | 9.24%  | 0.00950467 |
| GO:0008219~cell death                                   | 11    | 9.24%  | 0.00950467 |
| GO:0008283~cell proliferation                           | 11    | 9.24%  | 0.01140801 |
| GO:0006915~apoptosis                                    | 10    | 8.40%  | 0.01943025 |
| GO:0012501~programmed cell death                        | 10    | 8.40%  | 0.02096655 |
| GO:0048518~positive regulation of biological process    | 12    | 10.08% | 0.04580325 |
| GO:0048523~negative regulation of cellular process      | 11    | 9.24%  | 0.05139072 |
| GO:0048522~positive regulation of cellular process      | 11    | 9.24%  | 0.05577828 |
| GO:0008284~positive regulation of cell proliferation    | 5     | 4.20%  | 0.05685355 |
| GO:0043065~positive regulation of apoptosis             | 5     | 4.20%  | 0.06626229 |
| GO:0043068~positive regulation of programmed cell death | 5     | 4.20%  | 0.06854287 |
| GO:0048519~negative regulation of biological process    | 11    | 9.24%  | 0.07541499 |
| GO:0042127~regulation of cell proliferation             | 7     | 5.88%  | 0.08055805 |
| GO:0042981~regulation of apoptosis                      | 7     | 5.88%  | 0.09226092 |
| GO:0043067~regulation of programmed cell death          | 7     | 5.88%  | 0.09745399 |
| GO:0043066~negative regulation of apoptosis             | 4     | 3.36%  | 0.147503   |
| GO:0043069~negative regulation of programmed cell death | 4     | 3.36%  | 0.15030364 |

Median: 0.029321235494187657

Geo: 0.038754254726694026

| Term                                                | Count | %      | PValue     |
|-----------------------------------------------------|-------|--------|------------|
| GO:0051179~localization                             | 30    | 25.21% | 7.56E-04   |
| GO:0006810~transport                                | 25    | 21.01% | 0.00354746 |
| GO:0051234~establishment of localization            | 25    | 21.01% | 0.00574139 |
| GO:0022892~substrate-specific transporter activity  | 14    | 11.76% | 0.00815607 |
| GO:0022857~transmembrane transporter activity       | 13    | 10.92% | 0.00963755 |
| GO:0006812~cation transport                         | 9     | 7.56%  | 0.00979958 |
| GO:0030001~metal ion transport                      | 8     | 6.72%  | 0.01000551 |
| GO:0022891~substrate-specific transmembrane tra     | 12    | 10.08% | 0.01211268 |
| GO:0015674~di-, tri-valent inorganic cation transpo | 5     | 4.20%  | 0.01456401 |
| GO:0005215~transporter activity                     | 15    | 12.61% | 0.02445628 |
| GO:0022803~passive transmembrane transporter a      | 7     | 5.88%  | 0.02559288 |
| GO:0015267~channel activity                         | 7     | 5.88%  | 0.02559288 |
| GO:0015075~ion transmembrane transporter activi     | 10    | 8.40%  | 0.02773796 |
| GO:0006811~ion transport                            | 10    | 8.40%  | 0.02932124 |
| GO:0006816~calcium ion transport                    | 4     | 3.36%  | 0.03470812 |
| GO:0046873~metal ion transmembrane transporter      | 6     | 5.04%  | 0.04073964 |
| GO:0008324~cation transmembrane transporter ac      | 8     | 6.72%  | 0.04694332 |
| GO:0022838~substrate specific channel activity      | 6     | 5.04%  | 0.06781793 |
| GO:0022890~inorganic cation transmembrane tran      | 4     | 3.36%  | 0.09697663 |
| GO:0005216~ion channel activity                     | 5     | 4.20%  | 0.16194302 |
| GO:0015077~monovalent inorganic cation transme      | 3     | 2.52%  | 0.19009553 |
| GO:0005261~cation channel activity                  | 4     | 3.36%  | 0.20972592 |
| GO:0015672~monovalent inorganic cation transpor     | 4     | 3.36%  | 0.27459217 |
| GO:0005244~voltage-gated ion channel activity       | 3     | 2.52%  | 0.27903633 |
| GO:0022832~voltage-gated channel activity           | 3     | 2.52%  | 0.27903633 |
| GO:0022836~gated channel activity                   | 3     | 2.52%  | 0.50244347 |
| transport                                           | 4     | 3.36%  | 0.92879381 |

Median: 0.05103870428246421

Geo: 0.04066100997140925

| Term                                | Count | %     | PValue     |
|-------------------------------------|-------|-------|------------|
| gpi-anchor                          | 4     | 3.36% | 0.00498683 |
| GO:0048503~GPI anchor binding       | 4     | 3.36% | 0.00526782 |
| GO:0035091~phosphoinositide binding | 4     | 3.36% | 0.03295023 |
| GO:0008289~lipid binding            | 6     | 5.04% | 0.0510387  |
| lipoprotein                         | 6     | 5.04% | 0.0603392  |
| GO:0005543~phospholipid binding     | 4     | 3.36% | 0.08847203 |
| glycoprotein                        | 10    | 8.40% | 0.77916217 |

Median: 0.06375143382925563

Geo: 0.055121287609943094

| Term                                        | Count | %     | PValue     |
|---------------------------------------------|-------|-------|------------|
| GO:0000902~cell morphogenesis               | 9     | 7.56% | 0.00654198 |
| GO:0032989~cellular structure morphogenesis | 9     | 7.56% | 0.00654198 |
| GO:0051674~localization of cell             | 8     | 6.72% | 0.00843971 |

|                                                   |    |       |            |
|---------------------------------------------------|----|-------|------------|
| GO:0006928~cell motility                          | 8  | 6.72% | 0.00843971 |
| GO:0045664~regulation of neuron differentiation   | 3  | 2.52% | 0.02142502 |
| GO:0030182~neuron differentiation                 | 6  | 5.04% | 0.03435246 |
| GO:0007399~nervous system development             | 10 | 8.40% | 0.03763158 |
| GO:0009966~regulation of signal transduction      | 7  | 5.88% | 0.0550051  |
| GO:0048699~generation of neurons                  | 6  | 5.04% | 0.0551754  |
| GO:0009888~tissue development                     | 6  | 5.04% | 0.06087848 |
| GO:0030030~cell projection organization and bioge | 5  | 4.20% | 0.06255205 |
| GO:0032990~cell part morphogenesis                | 5  | 4.20% | 0.06255205 |
| GO:0048858~cell projection morphogenesis          | 5  | 4.20% | 0.06255205 |
| GO:0009611~response to wounding                   | 7  | 5.88% | 0.06495082 |
| GO:0022008~neurogenesis                           | 6  | 5.04% | 0.07722863 |
| GO:0048667~neuron morphogenesis during differe    | 4  | 3.36% | 0.08301481 |
| GO:0048812~neurite morphogenesis                  | 4  | 3.36% | 0.08301481 |
| GO:0050793~regulation of developmental process    | 5  | 4.20% | 0.0890998  |
| GO:0009653~anatomical structure morphogenesis     | 11 | 9.24% | 0.09039635 |
| GO:0016477~cell migration                         | 5  | 4.20% | 0.09174819 |
| GO:0040007~growth                                 | 5  | 4.20% | 0.09533805 |
| GO:0000904~cellular morphogenesis during differe  | 4  | 3.36% | 0.10288219 |
| GO:0031175~neurite development                    | 4  | 3.36% | 0.11410047 |
| GO:0048666~neuron development                     | 4  | 3.36% | 0.14890113 |
| GO:0045595~regulation of cell differentiation     | 3  | 2.52% | 0.29754846 |
| GO:0007243~protein kinase cascade                 | 4  | 3.36% | 0.38887732 |

Median: 0.06568497554225985

Geo: 0.07576685350125058

| Term                                        | Count | %     | PValue     |
|---------------------------------------------|-------|-------|------------|
| GO:0006665~sphingolipid metabolic process   | 4     | 3.36% | 0.00289589 |
| GO:0046519~sphingoid metabolic process      | 3     | 2.52% | 0.01366877 |
| GO:0006643~membrane lipid metabolic process | 4     | 3.36% | 0.06305875 |
| GO:0005783~endoplasmic reticulum            | 8     | 6.72% | 0.06568498 |
| GO:0044255~cellular lipid metabolic process | 5     | 4.20% | 0.38170379 |
| GO:0008610~lipid biosynthetic process       | 3     | 2.52% | 0.43645072 |
| GO:0006629~lipid metabolic process          | 5     | 4.20% | 0.52477172 |

Median: 0.12698373523485457

Geo: 0.1085747713659542

| Term                                          | Count | %     | PValue     |
|-----------------------------------------------|-------|-------|------------|
| GO:0030659~cytoplasmic vesicle membrane       | 4     | 3.36% | 0.00995806 |
| GO:0044433~cytoplasmic vesicle part           | 4     | 3.36% | 0.01786045 |
| GO:0012506~vesicle membrane                   | 4     | 3.36% | 0.02250049 |
| GO:0006886~intracellular protein transport    | 7     | 5.88% | 0.03008529 |
| GO:0030662~coated vesicle membrane            | 3     | 2.52% | 0.03867681 |
| GO:0046907~intracellular transport            | 9     | 7.56% | 0.04142686 |
| GO:0031982~vesicle                            | 6     | 5.04% | 0.05214339 |
| calcium                                       | 6     | 5.04% | 0.0881864  |
| GO:0016023~cytoplasmic membrane-bound vesicle | 5     | 4.20% | 0.10152223 |

|                                                   |   |       |            |
|---------------------------------------------------|---|-------|------------|
| GO:0031988~membrane-bound vesicle                 | 5 | 4.20% | 0.10963595 |
| GO:0015031~protein transport                      | 7 | 5.88% | 0.11611726 |
| GO:0031410~cytoplasmic vesicle                    | 5 | 4.20% | 0.12233789 |
| GO:0051649~establishment of cellular localization | 9 | 7.56% | 0.12639205 |
| GO:0031090~organelle membrane                     | 8 | 6.72% | 0.12757542 |
| GO:0051641~cellular localization                  | 9 | 7.56% | 0.13266272 |
| GO:0045184~establishment of protein localization  | 7 | 5.88% | 0.1517592  |
| GO:0022607~cellular component assembly            | 6 | 5.04% | 0.16807623 |
| GO:0008104~protein localization                   | 7 | 5.88% | 0.18813107 |
| GO:0006461~protein complex assembly               | 4 | 3.36% | 0.20488479 |
| GO:0033036~macromolecule localization             | 7 | 5.88% | 0.21509493 |
| GO:0030135~coated vesicle                         | 3 | 2.52% | 0.24447744 |
| GO:0016192~vesicle-mediated transport             | 5 | 4.20% | 0.27460159 |
| GO:0065003~macromolecular complex assembly        | 5 | 4.20% | 0.27726166 |
| alternative splicing                              | 7 | 5.88% | 0.28705867 |
| GO:0012505~endomembrane system                    | 4 | 3.36% | 0.49566323 |
| splice variant                                    | 6 | 5.04% | 0.50529718 |

Median: 0.09566593468640966

Geo: 0.12641338012275546

| Term                                          | Count | %     | PValue     |
|-----------------------------------------------|-------|-------|------------|
| GO:0048514~blood vessel morphogenesis         | 4     | 3.36% | 0.06705093 |
| GO:0009653~anatomical structure morphogenesis | 11    | 9.24% | 0.09039635 |
| GO:0001568~blood vessel development           | 4     | 3.36% | 0.09097701 |
| GO:0001944~vasculature development            | 4     | 3.36% | 0.09566593 |
| GO:0001525~angiogenesis                       | 3     | 2.52% | 0.17276244 |
| GO:0009887~organ morphogenesis                | 5     | 4.20% | 0.23150988 |
| GO:0048646~anatomical structure formation     | 3     | 2.52% | 0.244505   |

Median: 0.4181424454299303

Geo: 0.12708631750829097

| Term                                             | Count | %     | PValue     |
|--------------------------------------------------|-------|-------|------------|
| GO:0051258~protein polymerization                | 5     | 4.20% | 3.37E-04   |
| GO:0046785~microtubule polymerization            | 3     | 2.52% | 0.00122634 |
| propeptide:Removed in mature form                | 5     | 4.20% | 0.00483429 |
| GO:0007010~cytoskeleton organization and biogen  | 9     | 7.56% | 0.00554424 |
| GO:0051128~regulation of cellular component orga | 4     | 3.36% | 0.00739916 |
| GO:0031109~microtubule polymerization or depoly  | 3     | 2.52% | 0.00960909 |
| GO:0030036~actin cytoskeleton organization and b | 5     | 4.20% | 0.0231797  |
| Methylation                                      | 4     | 3.36% | 0.02721095 |
| GO:0030029~actin filament-based process          | 5     | 4.20% | 0.02752056 |
| GO:0006996~organelle organization and biogenesis | 11    | 9.24% | 0.04869729 |
| GO:0000226~microtubule cytoskeleton organization | 3     | 2.52% | 0.07868213 |
| GO:0050793~regulation of developmental process   | 5     | 4.20% | 0.0890998  |
| GO:0007017~microtubule-based process             | 4     | 3.36% | 0.11923121 |
| rno04810:Regulation of actin cytoskeleton        | 4     | 3.36% | 0.30419871 |

|                                                          |    |        |            |
|----------------------------------------------------------|----|--------|------------|
| cytoplasm                                                | 9  | 7.56%  | 0.40296436 |
| GO:0017111~nucleoside-triphosphatase activity            | 5  | 4.20%  | 0.41814245 |
| GO:0016462~pyrophosphatase activity                      | 5  | 4.20%  | 0.44739985 |
| GO:0016818~hydrolase activity, acting on acid anhydrides | 5  | 4.20%  | 0.45292712 |
| GO:0016817~hydrolase activity, acting on acid anhydrides | 5  | 4.20%  | 0.4598126  |
| GO:0042623~ATPase activity, coupled                      | 3  | 2.52%  | 0.51221187 |
| nucleotide-binding                                       | 6  | 5.04%  | 0.55462111 |
| GO:0016787~hydrolase activity                            | 13 | 10.92% | 0.58971636 |
| GO:0016887~ATPase activity                               | 3  | 2.52%  | 0.6078906  |
| atp-binding                                              | 4  | 3.36%  | 0.72056333 |
| GO:0032553~ribonucleotide binding                        | 6  | 5.04%  | 0.96851476 |
| GO:0032555~purine ribonucleotide binding                 | 6  | 5.04%  | 0.96851476 |
| GO:0017076~purine nucleotide binding                     | 6  | 5.04%  | 0.97692857 |
| GO:0000166~nucleotide binding                            | 7  | 5.88%  | 0.97699087 |
| GO:0005524~ATP binding                                   | 4  | 3.36%  | 0.9859679  |
| GO:0032559~adenyl ribonucleotide binding                 | 4  | 3.36%  | 0.98743697 |
| GO:0030554~adenyl nucleotide binding                     | 4  | 3.36%  | 0.99120971 |

Median: 0.22688672366390947

Geo: 0.17317491533194845

| Term                               | Count | %     | PValue     |
|------------------------------------|-------|-------|------------|
| GO:0040007~growth                  | 5     | 4.20% | 0.09533805 |
| GO:0016049~cell growth             | 3     | 2.52% | 0.22688672 |
| GO:0008361~regulation of cell size | 3     | 2.52% | 0.24009306 |

Median: 0.2165902008057497

Geo: 0.19738681531543417

| Term                             | Count | %     | PValue     |
|----------------------------------|-------|-------|------------|
| GO:0009611~response to wounding  | 7     | 5.88% | 0.06495082 |
| GO:0006950~response to stress    | 10    | 8.40% | 0.16020793 |
| GO:0006954~inflammatory response | 4     | 3.36% | 0.27297247 |
| GO:0006952~defense response      | 4     | 3.36% | 0.53442293 |

Median: 0.21605817549213288

Geo: 0.19865088907109454

| Term                            | Count | %     | PValue     |
|---------------------------------|-------|-------|------------|
| GO:0009888~tissue development   | 6     | 5.04% | 0.06087848 |
| GO:0001503~ossification         | 3     | 2.52% | 0.1920233  |
| GO:0031214~biomineral formation | 3     | 2.52% | 0.1920233  |
| GO:0046849~bone remodeling      | 3     | 2.52% | 0.24009306 |
| GO:0048771~tissue remodeling    | 3     | 2.52% | 0.26881863 |
| GO:0001501~skeletal development | 3     | 2.52% | 0.42416269 |

Median: 0.27889043603661545

Geo: 0.2011624834289807

| Term                        | Count | %      | PValue     |
|-----------------------------|-------|--------|------------|
| GO:0044444~cytoplasmic part | 27    | 22.69% | 0.03720137 |
| GO:0005737~cytoplasm        | 33    | 27.73% | 0.05258976 |
| GO:0005622~intracellular    | 51    | 42.86% | 0.13093863 |



|                                                |    |        |            |
|------------------------------------------------|----|--------|------------|
| GO:0043229~intracellular organelle             | 41 | 34.45% | 0.1348883  |
| GO:0043226~organelle                           | 41 | 34.45% | 0.13808623 |
| GO:0044424~intracellular part                  | 45 | 37.82% | 0.27889044 |
| GO:0043231~intracellular membrane-bound organe | 33 | 27.73% | 0.30426919 |
| GO:0043227~membrane-bound organelle            | 33 | 27.73% | 0.30690129 |
| GO:0005623~cell                                | 75 | 63.03% | 0.37068418 |
| GO:0044464~cell part                           | 74 | 62.18% | 0.54899273 |
| GO:0009987~cellular process                    | 64 | 53.78% | 0.863184   |

Median: 0.15196001235368436

Geo: 0.20457578861941178

| Term                             | Count | %     | PValue     |
|----------------------------------|-------|-------|------------|
| GO:0005783~endoplasmic reticulum | 8     | 6.72% | 0.06568498 |
| endoplasmic reticulum            | 5     | 4.20% | 0.15196001 |
| transmembrane region             | 10    | 8.40% | 0.85776306 |

Median: 0.13366383848907484

Geo: 0.22905797793122154

| Term                                     | Count | %     | PValue     |
|------------------------------------------|-------|-------|------------|
| GO:0006935~chemotaxis                    | 3     | 2.52% | 0.13340296 |
| GO:0042330~taxis                         | 3     | 2.52% | 0.13340296 |
| GO:0007610~behavior                      | 5     | 4.20% | 0.13366384 |
| GO:0007626~locomotory behavior           | 3     | 2.52% | 0.26660663 |
| GO:0042221~response to chemical stimulus | 6     | 5.04% | 0.99428592 |

Median: 0.21635803992904926

Geo: 0.2376488035116084

| Term                                 | Count | %     | PValue     |
|--------------------------------------|-------|-------|------------|
| GO:0005096~GTPase activator activity | 3     | 2.52% | 0.18339936 |
| GO:0030234~enzyme regulator activity | 7     | 5.88% | 0.20844452 |
| GO:0030695~GTPase regulator activity | 4     | 3.36% | 0.22427156 |
| GO:0008047~enzyme activator activity | 3     | 2.52% | 0.37203176 |

Median: 0.22736533800174696

Geo: 0.2824205975609152

| Term                                            | Count | %     | PValue     |
|-------------------------------------------------|-------|-------|------------|
| GO:0048545~response to steroid hormone stimulus | 3     | 2.52% | 0.12540959 |
| GO:0009719~response to endogenous stimulus      | 5     | 4.20% | 0.20139135 |
| GO:0009725~response to hormone stimulus         | 3     | 2.52% | 0.25333932 |
| GO:0042221~response to chemical stimulus        | 6     | 5.04% | 0.99428592 |

Median: 0.2986929605585694

Geo: 0.2956774482192189

| Term                                          | Count | %     | PValue     |
|-----------------------------------------------|-------|-------|------------|
| GO:0050790~regulation of catalytic activity   | 5     | 4.20% | 0.23023173 |
| GO:0065009~regulation of a molecular function | 5     | 4.20% | 0.29869296 |
| GO:0051338~regulation of transferase activity | 3     | 2.52% | 0.37589317 |

Median: 0.48319041257918804

Geo: 0.2994837815815022

| Term | Count | % | PValue |
|------|-------|---|--------|
|------|-------|---|--------|

|                                                   |   |       |            |
|---------------------------------------------------|---|-------|------------|
| GO:0007050~cell cycle arrest                      | 3 | 2.52% | 0.03831729 |
| GO:0045786~negative regulation of progression thr | 3 | 2.52% | 0.13139359 |
| GO:0000074~regulation of progression through cell | 3 | 2.52% | 0.48028099 |
| GO:0051726~regulation of cell cycle               | 3 | 2.52% | 0.48609983 |
| GO:0022402~cell cycle process                     | 3 | 2.52% | 0.74850836 |
| GO:0007049~cell cycle                             | 3 | 2.52% | 0.82007454 |

Median: 0.36012413372890034

Geo: 0.34114833908466563

| Term                                   | Count | %      | PValue     |
|----------------------------------------|-------|--------|------------|
| GO:0005615~extracellular space         | 16    | 13.45% | 0.10473089 |
| GO:0044421~extracellular region part   | 16    | 13.45% | 0.14825301 |
| GO:0005576~extracellular region signal | 16    | 13.45% | 0.28147749 |
| disulfide bond                         | 11    | 9.24%  | 0.36012413 |
| signal peptide                         | 10    | 8.40%  | 0.49379321 |
| Secreted                               | 9     | 7.56%  | 0.82725323 |
|                                        | 4     | 3.36%  | 0.83645974 |

Median: 0.41578343518711314

Geo: 0.3415495270682285

| Term                                    | Count | %     | PValue     |
|-----------------------------------------|-------|-------|------------|
| GO:0031090~organelle membrane           | 8     | 6.72% | 0.12757542 |
| GO:0031966~mitochondrial membrane       | 4     | 3.36% | 0.21886529 |
| GO:0005740~mitochondrial envelope       | 4     | 3.36% | 0.26119565 |
| GO:0044429~mitochondrial part           | 4     | 3.36% | 0.38474803 |
| GO:0005743~mitochondrial inner membrane | 3     | 2.52% | 0.41578344 |
| GO:0019866~organelle inner membrane     | 3     | 2.52% | 0.44419225 |
| GO:0031975~envelope                     | 4     | 3.36% | 0.47119996 |
| GO:0031967~organelle envelope           | 4     | 3.36% | 0.47119996 |
| GO:0005739~mitochondrion                | 6     | 5.04% | 0.54972855 |

Median: 0.6692685796256796

Geo: 0.34206884401432364

| Term                                    | Count | %      | PValue     |
|-----------------------------------------|-------|--------|------------|
| GO:0005886~plasma membrane              | 21    | 17.65% | 0.00824633 |
| membrane                                | 23    | 19.33% | 0.04504188 |
| GO:0044459~plasma membrane part         | 15    | 12.61% | 0.07477456 |
| GO:0005887~integral to plasma membrane  | 8     | 6.72%  | 0.35720236 |
| GO:0016020~membrane                     | 42    | 35.29% | 0.37195217 |
| GO:0031226~intrinsic to plasma membrane | 8     | 6.72%  | 0.3720425  |
| transmembrane                           | 13    | 10.92% | 0.66010746 |
| GO:0044425~membrane part                | 32    | 26.89% | 0.6784297  |
| transmembrane protein                   | 3     | 2.52%  | 0.77150498 |
| topological domain:Cytoplasmic          | 8     | 6.72%  | 0.85461623 |
| transmembrane region                    | 10    | 8.40%  | 0.85776306 |
| GO:0016021~integral to membrane         | 24    | 20.17% | 0.94918057 |
| GO:0031224~intrinsic to membrane        | 24    | 20.17% | 0.95202413 |
| topological domain:Extracellular        | 5     | 4.20%  | 0.95580871 |

|                                                    |                                  |
|----------------------------------------------------|----------------------------------|
| Median: 0.6697869754096847                         | Geo: 0.3551016719532347          |
| Term                                               | Count      %              PValue |
| GO:0007242~intracellular signaling cascade         | 14      11.76%    0.0380455      |
| GO:0007154~cell communication                      | 27      22.69%    0.54613563     |
| GO:0007165~signal transduction                     | 22      18.49%    0.79343832     |
| GO:0007166~cell surface receptor linked signal tra | 11      9.24%     0.9644815      |

|                                               |                                  |
|-----------------------------------------------|----------------------------------|
| Median: 0.4580394280214789                    | Geo: 0.3817041963201787          |
| Term                                          | Count      %              PValue |
| GO:0003714~transcription corepressor activity | 3      2.52%    0.10708232       |
| GO:0016564~transcription repressor activity   | 3      2.52%    0.33159958       |
| GO:0003712~transcription cofactor activity    | 3      2.52%    0.45803943       |
| GO:0008134~transcription factor binding       | 3      2.52%    0.65248975       |
| GO:0030528~transcription regulator activity   | 7      5.88%    0.76353048       |

|                                                   |                                  |
|---------------------------------------------------|----------------------------------|
| Median: 0.9948670647412782                        | Geo: 0.38869644747229287         |
| Term                                              | Count      %              PValue |
| GO:0007267~cell-cell signaling                    | 10     8.40%    0.02010251       |
| GO:0007268~synaptic transmission                  | 6      5.04%    0.08269739       |
| GO:0019226~transmission of nerve impulse          | 6      5.04%    0.1264984        |
| GO:0003008~system process                         | 9      7.56%    0.96937986       |
| GO:0050877~neurological system process            | 6      5.04%    0.99486706       |
| GO:0007186~G-protein coupled receptor protein sig | 5      4.20%    0.99888011       |
| GO:0001584~rhodopsin-like receptor activity       | 3      2.52%    0.99985866       |
| GO:0004930~G-protein coupled receptor activity    | 3      2.52%    0.99994731       |
| GO:0004888~transmembrane receptor activity        | 4      3.36%    0.99995356       |

|                                         |                                  |
|-----------------------------------------|----------------------------------|
| Median: 0.7490033588699851              | Geo: 0.4160549356873782          |
| Term                                    | Count      %              PValue |
| GO:0031090~organelle membrane           | 8      6.72%    0.12757542       |
| GO:0044446~intracellular organelle part | 13     10.92%   0.74900336       |
| GO:0044422~organelle part               | 13     10.92%   0.75370476       |

|                                         |                                  |
|-----------------------------------------|----------------------------------|
| Median: 0.4748806082394614              | Geo: 0.45696154314135434         |
| Term                                    | Count      %              PValue |
| GO:0005509~calcium ion binding          | 7      5.88%    0.30641968       |
| GO:0043167~ion binding                  | 20     16.81%   0.35301025       |
| GO:0046872~metal ion binding            | 19     15.97%   0.41200894       |
| GO:0043169~cation binding               | 17     14.29%   0.53775228       |
| GO:0008270~zinc ion binding             | 9      7.56%    0.58962396       |
| GO:0046914~transition metal ion binding | 11     9.24%    0.64433232       |

|                            |                                  |
|----------------------------|----------------------------------|
| Median: 0.6108548056123693 | Geo: 0.46366787538666515         |
| Term                       | Count      %              PValue |

|                                                  |   |       |            |
|--------------------------------------------------|---|-------|------------|
| GO:0009055~electron carrier activity             | 4 | 3.36% | 0.16010272 |
| rno00190:Oxidative phosphorylation               | 3 | 2.52% | 0.29465413 |
| GO:0005739~mitochondrion                         | 6 | 5.04% | 0.54972855 |
| GO:0006091~generation of precursor metabolites a | 4 | 3.36% | 0.67198106 |
| GO:0006118~electron transport                    | 3 | 2.52% | 0.72145424 |
| GO:0016491~oxidoreductase activity               | 5 | 4.20% | 0.79034494 |

Median: 0.5781882914454173

Geo: 0.4860358594698407

| Term                                           | Count | %     | PValue     |
|------------------------------------------------|-------|-------|------------|
| GO:0005856~cytoskeleton                        | 8     | 6.72% | 0.18425912 |
| GO:0043232~intracellular non-membrane-bound or | 10    | 8.40% | 0.57818829 |
| GO:0043228~non-membrane-bound organelle        | 10    | 8.40% | 0.57818829 |
| GO:0044430~cytoskeletal part                   | 4     | 3.36% | 0.64268789 |
| GO:0005198~structural molecule activity        | 5     | 4.20% | 0.68513139 |

Median: 0.9423352055185812

Geo: 0.5612926576195539

| Term                                             | Count | %     | PValue     |
|--------------------------------------------------|-------|-------|------------|
| GO:0006119~oxidative phosphorylation             | 3     | 2.52% | 0.09294528 |
| GO:0006091~generation of precursor metabolites a | 4     | 3.36% | 0.67198106 |
| GO:0016310~phosphorylation                       | 3     | 2.52% | 0.94233521 |
| GO:0006793~phosphorus metabolic process          | 3     | 2.52% | 0.97292307 |
| GO:0006796~phosphate metabolic process           | 3     | 2.52% | 0.97292307 |

Median: 0.9706858737440671

Geo: 0.6755664698446382

| Term                                               | Count | %     | PValue     |
|----------------------------------------------------|-------|-------|------------|
| rno04012:ErbB signaling pathway                    | 3     | 2.52% | 0.19756883 |
| kinase                                             | 3     | 2.52% | 0.74437278 |
| GO:0016301~kinase activity                         | 3     | 2.52% | 0.97068587 |
| GO:0016772~transferase activity, transferring phos | 3     | 2.52% | 0.98728428 |
| GO:0016740~transferase activity                    | 4     | 3.36% | 0.99841383 |

Median: 0.7330494427919996

Geo: 0.689925413309536

| Term          | Count | %     | PValue     |
|---------------|-------|-------|------------|
| Ionic channel | 3     | 2.52% | 0.48234063 |
| ion transport | 3     | 2.52% | 0.73304944 |
| transport     | 4     | 3.36% | 0.92879381 |

Median: 0.7762607275814594

Geo: 0.7381337367173091

| Term                                            | Count | %      | PValue     |
|-------------------------------------------------|-------|--------|------------|
| GO:0019538~protein metabolic process            | 20    | 16.81% | 0.51096511 |
| GO:0043170~macromolecule metabolic process      | 32    | 26.89% | 0.65084492 |
| GO:0044260~cellular macromolecule metabolic pro | 17    | 14.29% | 0.72895769 |
| GO:0044238~primary metabolic process            | 36    | 30.25% | 0.76037186 |
| GO:0044267~cellular protein metabolic process   | 16    | 13.45% | 0.79214959 |
| GO:0044237~cellular metabolic process           | 35    | 29.41% | 0.81029799 |

|                                         |    |        |            |
|-----------------------------------------|----|--------|------------|
| GO:0008152~metabolic process            | 39 | 32.77% | 0.85052368 |
| GO:0043283~biopolymer metabolic process | 19 | 15.97% | 0.87567903 |

Median: 0.796723032466517

Geo: 0.7558166759021745

| Term                                                        | Count | %      | PValue     |
|-------------------------------------------------------------|-------|--------|------------|
| GO:0019222~regulation of metabolic process                  | 13    | 10.92% | 0.43267287 |
| GO:0010468~regulation of gene expression                    | 11    | 9.24%  | 0.53827834 |
| GO:0031323~regulation of cellular metabolic process         | 11    | 9.24%  | 0.62702663 |
| GO:0045449~regulation of transcription                      | 9     | 7.56%  | 0.71296839 |
| GO:0006355~regulation of transcription, DNA-dependent       | 8     | 6.72%  | 0.74680584 |
| GO:0019219~regulation of nucleobase, nucleoside, nucleotide | 9     | 7.56%  | 0.74927528 |
| GO:0030528~transcription regulator activity                 | 7     | 5.88%  | 0.76353048 |
| GO:0006350~transcription                                    | 9     | 7.56%  | 0.77827361 |
| GO:0006351~transcription, DNA-dependent                     | 8     | 6.72%  | 0.79672303 |
| GO:0032774~RNA biosynthetic process                         | 8     | 6.72%  | 0.79846712 |
| GO:0010467~gene expression                                  | 13    | 10.92% | 0.81665599 |
| GO:0006139~nucleobase, nucleoside, nucleotide               | 14    | 11.76% | 0.82572682 |
| GO:0016070~RNA metabolic process                            | 9     | 7.56%  | 0.8732745  |
| GO:0043283~biopolymer metabolic process                     | 19    | 15.97% | 0.87567903 |
| GO:0003700~transcription factor activity                    | 4     | 3.36%  | 0.89256127 |
| GO:0003677~DNA binding                                      | 7     | 5.88%  | 0.91650031 |
| GO:0003676~nucleic acid binding                             | 12    | 10.08% | 0.92266281 |

Median: 0.7346365499807694

Geo: 0.7567949594906387

| Term                                          | Count | %     | PValue     |
|-----------------------------------------------|-------|-------|------------|
| GO:0006412~translation                        | 4     | 3.36% | 0.6856941  |
| GO:0009058~biosynthetic process               | 8     | 6.72% | 0.73223591 |
| GO:0009059~macromolecule biosynthetic process | 5     | 4.20% | 0.73703719 |
| GO:0044249~cellular biosynthetic process      | 5     | 4.20% | 0.88642519 |

Median: 0.8973573679866338

Geo: 0.8617550111058944

| Term          | Count | %     | PValue     |
|---------------|-------|-------|------------|
| zinc-finger   | 3     | 2.52% | 0.77262736 |
| metal-binding | 5     | 4.20% | 0.89735737 |
| zinc          | 3     | 2.52% | 0.92303026 |

Median: 0.9736314715800498

Geo: 0.9595490109139895

| Term                                               | Count | %     | PValue     |
|----------------------------------------------------|-------|-------|------------|
| GO:0043687~post-translational protein modification | 5     | 4.20% | 0.92717983 |
| GO:0006464~protein modification process            | 5     | 4.20% | 0.97363147 |
| GO:0043412~biopolymer modification                 | 5     | 4.20% | 0.97868494 |

Median: 0.9468890540524483

Geo: 0.9630591152749226

| Term                                  | Count | %      | PValue     |
|---------------------------------------|-------|--------|------------|
| GO:0004871~signal transducer activity | 14    | 11.76% | 0.94688905 |

|                                          |    |        |            |
|------------------------------------------|----|--------|------------|
| GO:0060089~molecular transducer activity | 14 | 11.76% | 0.94688905 |
| GO:0004872~receptor activity             | 9  | 7.56%  | 0.99623236 |

Table S5

Median: 6.748340700062148E-4

Geo: 6.426805056597486E-4

| Term                                            | Count | %      | PValue     |
|-------------------------------------------------|-------|--------|------------|
| GO:0032502~developmental process                | 45    | 29.61% | 4.78E-06   |
| GO:0048869~cellular developmental process       | 30    | 19.74% | 2.99E-05   |
| GO:0030154~cell differentiation                 | 30    | 19.74% | 2.99E-05   |
| GO:0007275~multicellular organismal development | 32    | 21.05% | 5.16E-04   |
| GO:0048731~system development                   | 28    | 18.42% | 6.75E-04   |
| GO:0048856~anatomical structure development     | 30    | 19.74% | 0.00152982 |
| GO:0048513~organ development                    | 22    | 14.47% | 0.00159909 |
| GO:0009653~anatomical structure morphogenesis   | 15    | 9.87%  | 0.05367044 |
| GO:0032501~multicellular organismal process     | 43    | 28.29% | 0.09576885 |

Median: 0.0036852104896518256

Geo: 0.00177884271287579

| Term                                                 | Count | %      | PValue     |
|------------------------------------------------------|-------|--------|------------|
| GO:0042127~regulation of cell proliferation          | 15    | 9.87%  | 8.15E-05   |
| GO:0008283~cell proliferation                        | 18    | 11.84% | 1.21E-04   |
| GO:0008285~negative regulation of cell proliferation | 8     | 5.26%  | 0.00304683 |
| GO:0008284~positive regulation of cell proliferation | 8     | 5.26%  | 0.00432359 |
| GO:0048523~negative regulation of cellular process   | 16    | 10.53% | 0.01161529 |
| GO:0048519~negative regulation of biological process | 16    | 10.53% | 0.02091638 |

Median: 0.011553468381934585

Geo: 0.003868567826100308

| Term                                                    | Count | %      | PValue     |
|---------------------------------------------------------|-------|--------|------------|
| GO:0032502~developmental process                        | 45    | 29.61% | 4.78E-06   |
| GO:0048869~cellular developmental process               | 30    | 19.74% | 2.99E-05   |
| GO:0030154~cell differentiation                         | 30    | 19.74% | 2.99E-05   |
| GO:0048468~cell development                             | 23    | 15.13% | 2.67E-04   |
| GO:0008219~cell death                                   | 14    | 9.21%  | 0.0066416  |
| GO:0016265~death                                        | 14    | 9.21%  | 0.0066416  |
| GO:0006915~apoptosis                                    | 13    | 8.55%  | 0.01155347 |
| GO:0012501~programmed cell death                        | 13    | 8.55%  | 0.01272079 |
| GO:0042981~regulation of apoptosis                      | 10    | 6.58%  | 0.03207116 |
| GO:0043067~regulation of programmed cell death          | 10    | 6.58%  | 0.03482955 |
| GO:0043066~negative regulation of apoptosis             | 5     | 3.29%  | 0.11766584 |
| GO:0043069~negative regulation of programmed cell death | 5     | 3.29%  | 0.12049239 |
| GO:0006916~anti-apoptosis                               | 3     | 1.97%  | 0.37109276 |

Median: 0.011139084952939873

Geo: 0.004790451489712513

| Term                                                 | Count | %      | PValue   |
|------------------------------------------------------|-------|--------|----------|
| GO:0048518~positive regulation of biological process | 26    | 17.11% | 1.34E-06 |
| GO:0032502~developmental process                     | 45    | 29.61% | 4.78E-06 |
| GO:0048522~positive regulation of cellular process   | 23    | 15.13% | 1.10E-05 |
| GO:0065007~biological regulation                     | 55    | 36.18% | 1.57E-05 |
| GO:0050794~regulation of cellular process            | 46    | 30.26% | 2.45E-05 |
| Transcription                                        | 15    | 9.87%  | 1.83E-04 |
| GO:0050789~regulation of biological process          | 47    | 30.92% | 2.50E-04 |
| Transcription regulation                             | 14    | 9.21%  | 5.62E-04 |
| GO:0045941~positive regulation of transcription      | 10    | 6.58%  | 7.67E-04 |

|                                                     |    |        |            |
|-----------------------------------------------------|----|--------|------------|
| GO:0045935~positive regulation of nucleobase, nucl  | 10 | 6.58%  | 0.00109242 |
| GO:0031325~positive regulation of cellular metaboli | 10 | 6.58%  | 0.00394122 |
| dna-binding                                         | 13 | 8.55%  | 0.00417032 |
| GO:0043283~biopolymer metabolic process             | 45 | 29.61% | 0.00463287 |
| GO:0006355~regulation of transcription, DNA-depen   | 22 | 14.47% | 0.00601692 |
| GO:0009893~positive regulation of metabolic proces  | 10 | 6.58%  | 0.00619934 |
| GO:0003677~DNA binding                              | 23 | 15.13% | 0.00621432 |
| nucleus                                             | 22 | 14.47% | 0.00675776 |
| GO:0016070~RNA metabolic process                    | 26 | 17.11% | 0.00861611 |
| GO:0006351~transcription, DNA-dependent             | 22 | 14.47% | 0.01101814 |
| GO:0032774~RNA biosynthetic process                 | 22 | 14.47% | 0.01126003 |
| GO:0003676~nucleic acid binding                     | 32 | 21.05% | 0.01151421 |
| GO:0019219~regulation of nucleobase, nucleoside, r  | 23 | 15.13% | 0.01208922 |
| GO:0045449~regulation of transcription              | 22 | 14.47% | 0.01618277 |
| GO:0019222~regulation of metabolic process          | 25 | 16.45% | 0.01911386 |
| GO:0003700~transcription factor activity            | 14 | 9.21%  | 0.01981277 |
| GO:0030528~transcription regulator activity         | 18 | 11.84% | 0.02085853 |
| GO:0005634~nucleus                                  | 35 | 23.03% | 0.02523932 |
| GO:0006139~nucleobase, nucleoside, nucleotide an    | 32 | 21.05% | 0.02781943 |
| GO:0006350~transcription                            | 22 | 14.47% | 0.03053968 |
| GO:0010468~regulation of gene expression            | 22 | 14.47% | 0.03448082 |
| GO:0031323~regulation of cellular metabolic proces  | 23 | 15.13% | 0.03705001 |
| GO:0045893~positive regulation of transcription, DN | 6  | 3.95%  | 0.05128254 |
| GO:0045944~positive regulation of transcription fro | 5  | 3.29%  | 0.06361487 |
| GO:0010467~gene expression                          | 27 | 17.76% | 0.11393444 |
| GO:0006357~regulation of transcription from RNA p   | 7  | 4.61%  | 0.14555294 |
| GO:0016563~transcription activator activity         | 5  | 3.29%  | 0.20323926 |
| GO:0006366~transcription from RNA polymerase II p   | 7  | 4.61%  | 0.30991157 |
| GO:0046983~protein dimerization activity            | 4  | 2.63%  | 0.5722885  |

Median: 0.00888381322916805

Geo: 0.005713472237800778

| Term                                    | Count | %      | PValue     |
|-----------------------------------------|-------|--------|------------|
| GO:0046872~metal ion binding            | 38    | 25.00% | 9.66E-04   |
| GO:0043167~ion binding                  | 38    | 25.00% | 0.00152226 |
| GO:0046914~transition metal ion binding | 26    | 17.11% | 0.00400902 |
| GO:0008270~zinc ion binding             | 20    | 13.16% | 0.0137586  |
| GO:0043169~cation binding               | 32    | 21.05% | 0.01799826 |
| metal-binding                           | 18    | 11.84% | 0.02383083 |

Median: 0.004267893538795904

Geo: 0.005825031646840147

| Term                             | Count | %     | PValue     |
|----------------------------------|-------|-------|------------|
| zinc finger                      | 6     | 3.95% | 2.17E-05   |
| DNA binding                      | 7     | 4.61% | 5.82E-04   |
| zinc finger region:C2H2-type 3   | 4     | 2.63% | 0.00360219 |
| zinc finger region:C2H2-type 2   | 4     | 2.63% | 0.00403583 |
| zinc finger region:C2H2-type 1   | 4     | 2.63% | 0.00449996 |
| zinc-finger                      | 9     | 5.92% | 0.07610532 |
| IPR007087:Zinc finger, C2H2-type | 5     | 3.29% | 0.10183541 |
| zinc                             | 10    | 6.58% | 0.20726519 |



Median: 0.007826510251834073

Geo: 0.007611786276558587

| Term                                             | Count | %     | PValue     |
|--------------------------------------------------|-------|-------|------------|
| GO:0001569~patterning of blood vessels           | 4     | 2.63% | 2.96E-04   |
| GO:0007389~pattern specification process         | 7     | 4.61% | 0.00204985 |
| GO:0048646~anatomical structure formation        | 7     | 4.61% | 0.00218479 |
| GO:0009880~embryonic pattern specification       | 4     | 2.63% | 0.00361935 |
| GO:0001525~angiogenesis                          | 6     | 3.95% | 0.00412935 |
| GO:0048754~branching morphogenesis of a tube     | 4     | 2.63% | 0.00484675 |
| GO:0001763~morphogenesis of a branching structur | 4     | 2.63% | 0.00669642 |
| GO:0009887~organ morphogenesis                   | 10    | 6.58% | 0.00782651 |
| GO:0048514~blood vessel morphogenesis            | 6     | 3.95% | 0.01028697 |
| GO:0001568~blood vessel development              | 6     | 3.95% | 0.01730714 |
| GO:0035295~tube development                      | 6     | 3.95% | 0.0176862  |
| GO:0001944~vasculature development               | 6     | 3.95% | 0.01885633 |
| GO:0035239~tube morphogenesis                    | 5     | 3.29% | 0.0231404  |
| GO:0009790~embryonic development                 | 7     | 4.61% | 0.044897   |
| GO:0009653~anatomical structure morphogenesis    | 15    | 9.87% | 0.05367044 |

Median: 0.05457297922436276

Geo: 0.014620536960131459

| Term                                                | Count | %     | PValue     |
|-----------------------------------------------------|-------|-------|------------|
| zinc finger                                         | 6     | 3.95% | 2.17E-05   |
| IPR003070:Orphan nuclear receptor                   | 3     | 1.97% | 2.97E-04   |
| PIRSF002524:probable hormone receptor N10, nucle    | 3     | 1.97% | 3.95E-04   |
| DNA binding                                         | 7     | 4.61% | 5.82E-04   |
| region of interest:Ligand-binding                   | 3     | 1.97% | 0.02103787 |
| IPR001723:Steroid hormone receptor                  | 3     | 1.97% | 0.05028855 |
| zinc finger region:NR C4-type                       | 3     | 1.97% | 0.05111912 |
| DNA-binding region:Nuclear receptor                 | 3     | 1.97% | 0.05111912 |
| IPR001628:Zinc finger, nuclear hormone receptor-tyf | 3     | 1.97% | 0.05802684 |
| IPR000536:Nuclear hormone receptor, ligand-binding  | 3     | 1.97% | 0.05802684 |
| IPR008946:Nuclear hormone receptor, ligand-binding  | 3     | 1.97% | 0.05802684 |
| GO:0003707~steroid hormone receptor activity        | 3     | 1.97% | 0.06048219 |
| SM00430:HOLI                                        | 3     | 1.97% | 0.07872766 |
| SM00399:ZnF_C4                                      | 3     | 1.97% | 0.07872766 |
| GO:0043565~sequence-specific DNA binding            | 7     | 4.61% | 0.11289371 |
| GO:0004879~ligand-dependent nuclear receptor act    | 3     | 1.97% | 0.12910237 |

Median: 0.027819433619917497

Geo: 0.0306394706702835

| Term                                             | Count | %      | PValue     |
|--------------------------------------------------|-------|--------|------------|
| GO:0043283~biopolymer metabolic process          | 45    | 29.61% | 0.00463287 |
| GO:0009987~cellular process                      | 101   | 66.45% | 0.01801886 |
| GO:0044237~cellular metabolic process            | 64    | 42.11% | 0.02644205 |
| GO:0006139~nucleobase, nucleoside, nucleotide an | 32    | 21.05% | 0.02781943 |
| GO:0044238~primary metabolic process             | 62    | 40.79% | 0.07000976 |
| GO:0008152~metabolic process                     | 68    | 44.74% | 0.0740469  |
| GO:0043170~macromolecule metabolic process       | 54    | 35.53% | 0.07963106 |

Median: 0.043534823014015345

Geo: 0.042953132282386765

| Term                                                 | Count | %     | PValue     |
|------------------------------------------------------|-------|-------|------------|
| GO:0019932~second-messenger-mediated signaling       | 7     | 4.61% | 0.0298774  |
| GO:0007200~G-protein signaling, coupled to IP3 sec   | 4     | 2.63% | 0.03872718 |
| GO:0043085~positive regulation of catalytic activity | 6     | 3.95% | 0.04834246 |
| GO:0048015~phosphoinositide-mediated signaling       | 4     | 2.63% | 0.06085438 |

Median: 0.04555127796655499

Geo: 0.04839470743609883

| Term                                             | Count | %     | PValue     |
|--------------------------------------------------|-------|-------|------------|
| GO:0030335~positive regulation of cell migration | 3     | 1.97% | 0.01085114 |
| GO:0040017~positive regulation of locomotion     | 3     | 1.97% | 0.01842662 |
| GO:0051272~positive regulation of cell motility  | 3     | 1.97% | 0.01842662 |
| GO:0016477~cell migration                        | 7     | 4.61% | 0.03362988 |
| GO:0006928~cell motility                         | 8     | 5.26% | 0.04555128 |
| GO:0051674~localization of cell                  | 8     | 5.26% | 0.04555128 |
| GO:0030334~regulation of cell migration          | 3     | 1.97% | 0.10050712 |
| GO:0051270~regulation of cell motility           | 3     | 1.97% | 0.12495972 |
| GO:0040012~regulation of locomotion              | 3     | 1.97% | 0.14485459 |
| GO:0040011~locomotion                            | 3     | 1.97% | 0.15065598 |

Median: 0.04022831394862833

Geo: 0.04844946335952177

| Term                                            | Count | %      | PValue     |
|-------------------------------------------------|-------|--------|------------|
| GO:0005622~intracellular                        | 77    | 50.66% | 0.00474    |
| GO:0043231~intracellular membrane-bound organel | 54    | 35.53% | 0.01200889 |
| GO:0043227~membrane-bound organelle             | 54    | 35.53% | 0.01229198 |
| GO:0005634~nucleus                              | 35    | 23.03% | 0.02523932 |
| GO:0044424~intracellular part                   | 68    | 44.74% | 0.03572386 |
| GO:0043229~intracellular organelle              | 59    | 38.82% | 0.04022831 |
| GO:0043226~organelle                            | 59    | 38.82% | 0.0417487  |
| GO:0005737~cytoplasm                            | 42    | 27.63% | 0.11320826 |
| GO:0044464~cell part                            | 105   | 69.08% | 0.23012183 |
| GO:0005623~cell                                 | 105   | 69.08% | 0.23111091 |
| GO:0044444~cytoplasmic part                     | 27    | 17.76% | 0.54126325 |

Median: 0.06545635625828403

Geo: 0.04962889637919206

| Term                                                 | Count | %     | PValue     |
|------------------------------------------------------|-------|-------|------------|
| GO:0050790~regulation of catalytic activity          | 10    | 6.58% | 0.0077088  |
| GO:0032147~activation of protein kinase activity     | 4     | 2.63% | 0.0132609  |
| GO:0065009~regulation of a molecular function        | 10    | 6.58% | 0.01587624 |
| GO:0045859~regulation of protein kinase activity     | 6     | 3.95% | 0.02954193 |
| GO:0043549~regulation of kinase activity             | 6     | 3.95% | 0.03284997 |
| GO:0051338~regulation of transferase activity        | 6     | 3.95% | 0.0369918  |
| GO:0007243~protein kinase cascade                    | 8     | 5.26% | 0.0386475  |
| GO:0043085~positive regulation of catalytic activity | 6     | 3.95% | 0.04834246 |
| GO:0006469~negative regulation of protein kinase a   | 3     | 1.97% | 0.08257025 |
| GO:0033673~negative regulation of kinase activity    | 3     | 1.97% | 0.08257025 |
| GO:0051348~negative regulation of transferase acti   | 3     | 1.97% | 0.08758647 |
| GO:0045860~positive regulation of protein kinase ac  | 4     | 2.63% | 0.0941953  |
| GO:0033674~positive regulation of kinase activity    | 4     | 2.63% | 0.10092596 |
| GO:0051347~positive regulation of transferase activ  | 4     | 2.63% | 0.10960265 |

|                                                      |   |       |            |
|------------------------------------------------------|---|-------|------------|
| GO:0051336~regulation of hydrolase activity          | 4 | 2.63% | 0.12777791 |
| GO:0043086~negative regulation of catalytic activity | 3 | 1.97% | 0.15650345 |

Median: 0.14206229159700978

Geo: 0.07125983280189296

| Term                                                | Count | %      | PValue     |
|-----------------------------------------------------|-------|--------|------------|
| GO:0007242~intracellular signaling cascade          | 22    | 14.47% | 0.00196264 |
| GO:0007154~cell communication                       | 45    | 29.61% | 0.08178314 |
| GO:0007165~signal transduction                      | 39    | 25.66% | 0.20234145 |
| GO:0007166~cell surface receptor linked signal tran | 20    | 13.16% | 0.79394355 |

Median: 0.10637149401814736

Geo: 0.0849474832216158

| Term                                               | Count | %      | PValue     |
|----------------------------------------------------|-------|--------|------------|
| GO:0000902~cell morphogenesis                      | 10    | 6.58%  | 0.01669842 |
| GO:0032989~cellular structure morphogenesis        | 10    | 6.58%  | 0.01669842 |
| GO:0016477~cell migration                          | 7     | 4.61%  | 0.03362988 |
| GO:0006928~cell motility                           | 8     | 5.26%  | 0.04555128 |
| GO:0051674~localization of cell                    | 8     | 5.26%  | 0.04555128 |
| GO:0030030~cell projection organization and bioger | 6     | 3.95%  | 0.05990029 |
| GO:0048858~cell projection morphogenesis           | 6     | 3.95%  | 0.05990029 |
| GO:0032990~cell part morphogenesis                 | 6     | 3.95%  | 0.05990029 |
| GO:0022008~neurogenesis                            | 7     | 4.61%  | 0.10172001 |
| GO:0030182~neuron differentiation                  | 6     | 3.95%  | 0.11102298 |
| GO:0016043~cellular component organization and b   | 26    | 17.11% | 0.11236985 |
| GO:0007409~axonogenesis                            | 4     | 2.63%  | 0.13916871 |
| GO:0048699~generation of neurons                   | 6     | 3.95%  | 0.1651285  |
| GO:0048812~neurite morphogenesis                   | 4     | 2.63%  | 0.1752294  |
| GO:0048667~neuron morphogenesis during differen    | 4     | 2.63%  | 0.1752294  |
| GO:0000904~cellular morphogenesis during differen  | 4     | 2.63%  | 0.21139848 |
| GO:0031175~neurite development                     | 4     | 2.63%  | 0.23117678 |
| GO:0048666~neuron development                      | 4     | 2.63%  | 0.28990286 |

Median: 0.09104503852992898

Geo: 0.0908244416758216

| Term                                      | Count | %     | PValue     |
|-------------------------------------------|-------|-------|------------|
| GO:0046649~lymphocyte activation          | 5     | 3.29% | 0.03889336 |
| GO:0042110~T cell activation              | 4     | 2.63% | 0.05815535 |
| GO:0045321~leukocyte activation           | 5     | 3.29% | 0.08376054 |
| GO:0002376~immune system process          | 11    | 7.24% | 0.0842084  |
| GO:0046651~lymphocyte proliferation       | 3     | 1.97% | 0.09788168 |
| GO:0032943~mononuclear cell proliferation | 3     | 1.97% | 0.09788168 |
| GO:0001775~cell activation                | 5     | 3.29% | 0.1162637  |
| GO:0006955~immune response                | 7     | 4.61% | 0.26056428 |

Median: 0.10263827467169256

Geo: 0.1099454504314445

| Term                                                 | Count | %     | PValue     |
|------------------------------------------------------|-------|-------|------------|
| protein phosphatase                                  | 4     | 2.63% | 0.01933435 |
| domain:Tyrosine-protein phosphatase                  | 3     | 1.97% | 0.03341908 |
| active site:Phosphocysteine intermediate             | 3     | 1.97% | 0.04191161 |
| GO:0006470~protein amino acid dephosphorylation      | 4     | 2.63% | 0.08289082 |
| IPR000387:Protein-tyrosine phosphatase, Tyr-specific | 3     | 1.97% | 0.08945855 |

|                                                    |    |        |            |
|----------------------------------------------------|----|--------|------------|
| GO:0042578~phosphoric ester hydrolase activity     | 6  | 3.95%  | 0.09679904 |
| GO:0016311~dephosphorylation                       | 4  | 2.63%  | 0.10263827 |
| GO:0016788~hydrolase activity, acting on ester bon | 9  | 5.92%  | 0.10830484 |
| GO:0004721~phosphoprotein phosphatase activity     | 4  | 2.63%  | 0.11146389 |
| GO:0004725~protein tyrosine phosphatase activity   | 3  | 1.97%  | 0.12631583 |
| GO:0016791~phosphoric monoester hydrolase activi   | 4  | 2.63%  | 0.28627894 |
| GO:0016787~hydrolase activity                      | 18 | 11.84% | 0.49881661 |
| hydrolase                                          | 7  | 4.61%  | 0.78952711 |

Median: 0.07802447275373386

Geo: 0.11298829618483724

| Term                                               | Count | %      | PValue     |
|----------------------------------------------------|-------|--------|------------|
| GO:0048168~regulation of neuronal synaptic plastic | 3     | 1.97%  | 0.03105792 |
| GO:0007268~synaptic transmission                   | 8     | 5.26%  | 0.04555128 |
| GO:0007267~cell-cell signaling                     | 11    | 7.24%  | 0.06121429 |
| GO:0048167~regulation of synaptic plasticity       | 3     | 1.97%  | 0.07522256 |
| GO:0019226~transmission of nerve impulse           | 8     | 5.26%  | 0.08082638 |
| GO:0050803~regulation of synapse structure and ac  | 3     | 1.97%  | 0.08758647 |
| GO:0003008~system process                          | 18    | 11.84% | 0.71987716 |
| GO:0050877~neurological system process             | 15    | 9.87%  | 0.80010184 |

Median: 0.07946974656261849

Geo: 0.12741174769041366

| Term                                              | Count | %     | PValue     |
|---------------------------------------------------|-------|-------|------------|
| GO:0007049~cell cycle                             | 9     | 5.92% | 0.06925923 |
| cell cycle                                        | 5     | 3.29% | 0.07650756 |
| GO:0000074~regulation of progression through cell | 6     | 3.95% | 0.07661957 |
| GO:0051726~regulation of cell cycle               | 6     | 3.95% | 0.07946975 |
| GO:0022402~cell cycle process                     | 8     | 5.26% | 0.08008684 |
| GO:0000278~mitotic cell cycle                     | 4     | 2.63% | 0.32204552 |
| GO:0022403~cell cycle phase                       | 3     | 1.97% | 0.65503475 |

Median: 0.12910236754218637

Geo: 0.1315662955643494

| Term                                 | Count | %     | PValue     |
|--------------------------------------|-------|-------|------------|
| GO:0004620~phospholipase activity    | 3     | 1.97% | 0.09416653 |
| GO:0016298~lipase activity           | 3     | 1.97% | 0.12910237 |
| GO:0004091~carboxylesterase activity | 3     | 1.97% | 0.18732821 |

Median: 0.23450793810192835

Geo: 0.1421944033974187

| Term                                             | Count | %     | PValue     |
|--------------------------------------------------|-------|-------|------------|
| GO:0042981~regulation of apoptosis               | 10    | 6.58% | 0.03207116 |
| GO:0043067~regulation of programmed cell death   | 10    | 6.58% | 0.03482955 |
| GO:0006917~induction of apoptosis                | 4     | 2.63% | 0.23339623 |
| GO:0012502~induction of programmed cell death    | 4     | 2.63% | 0.23561965 |
| GO:0043065~positive regulation of apoptosis      | 4     | 2.63% | 0.36341037 |
| GO:0043068~positive regulation of programmed cel | 4     | 2.63% | 0.37027961 |

Median: 0.21298981099252623

Geo: 0.14655099926417334

| Term                                               | Count | %      | PValue     |
|----------------------------------------------------|-------|--------|------------|
| GO:0043687~post-translational protein modification | 17    | 11.18% | 0.03447465 |
| GO:0043412~biopolymer modification                 | 19    | 12.50% | 0.05642001 |

|                                                  |    |        |            |
|--------------------------------------------------|----|--------|------------|
| GO:0006464~protein modification process          | 18 | 11.84% | 0.07583392 |
| GO:0043170~macromolecule metabolic process       | 54 | 35.53% | 0.07963106 |
| GO:0006793~phosphorus metabolic process          | 11 | 7.24%  | 0.21298981 |
| GO:0006796~phosphate metabolic process           | 11 | 7.24%  | 0.21298981 |
| GO:0044260~cellular macromolecule metabolic proc | 28 | 18.42% | 0.36408905 |
| GO:0019538~protein metabolic process             | 29 | 19.08% | 0.38759877 |
| GO:0044267~cellular protein metabolic process    | 27 | 17.76% | 0.41467928 |

Median: 0.14499032954436994

Geo: 0.15202648386524137

| Term                                 | Count | %     | PValue     |
|--------------------------------------|-------|-------|------------|
| GO:0040007~growth                    | 6     | 3.95% | 0.09774778 |
| GO:0016049~cell growth               | 4     | 2.63% | 0.13343014 |
| GO:0008361~regulation of cell size   | 4     | 2.63% | 0.14499033 |
| GO:0040008~regulation of growth      | 4     | 2.63% | 0.16699377 |
| GO:0001558~regulation of cell growth | 3     | 1.97% | 0.25715566 |

Median: 0.28092879778048224

Geo: 0.15998774749004374

| Term                                              | Count | %     | PValue     |
|---------------------------------------------------|-------|-------|------------|
| GO:0035295~tube development                       | 6     | 3.95% | 0.0176862  |
| GO:0045934~negative regulation of nucleobase, nuc | 5     | 3.29% | 0.17765547 |
| GO:0031324~negative regulation of cellular metabo | 5     | 3.29% | 0.2809288  |
| GO:0016481~negative regulation of transcription   | 4     | 2.63% | 0.33814868 |
| GO:0009892~negative regulation of metabolic proce | 5     | 3.29% | 0.35116929 |

Median: 0.21679396770072448

Geo: 0.17254682489492937

| Term                                                   | Count | %     | PValue     |
|--------------------------------------------------------|-------|-------|------------|
| GO:0007631~feeding behavior                            | 4     | 2.63% | 0.0132609  |
| GO:0019932~second-messenger-mediated signaling         | 7     | 4.61% | 0.0298774  |
| GO:0006873~cellular ion homeostasis                    | 5     | 3.29% | 0.14107926 |
| GO:0055082~cellular chemical homeostasis               | 5     | 3.29% | 0.14107926 |
| GO:0007204~elevation of cytosolic calcium ion conc     | 3     | 1.97% | 0.14485459 |
| GO:0051480~cytosolic calcium ion homeostasis           | 3     | 1.97% | 0.15357415 |
| GO:0050801~ion homeostasis                             | 5     | 3.29% | 0.17931515 |
| GO:0030005~cellular di-, tri-valent inorganic cation I | 4     | 2.63% | 0.18779203 |
| GO:0055066~di-, tri-valent inorganic cation homeost    | 4     | 2.63% | 0.18779203 |
| GO:0048878~chemical homeostasis                        | 5     | 3.29% | 0.24579591 |
| GO:0030003~cellular cation homeostasis                 | 4     | 2.63% | 0.24679262 |
| GO:0055080~cation homeostasis                          | 4     | 2.63% | 0.24679262 |
| GO:0019725~cellular homeostasis                        | 5     | 3.29% | 0.2753221  |
| GO:0042592~homeostatic process                         | 6     | 3.95% | 0.3060075  |
| GO:0006874~cellular calcium ion homeostasis            | 3     | 1.97% | 0.31923838 |
| GO:0055074~calcium ion homeostasis                     | 3     | 1.97% | 0.31923838 |
| GO:0006875~cellular metal ion homeostasis              | 3     | 1.97% | 0.3590126  |
| GO:0055065~metal ion homeostasis                       | 3     | 1.97% | 0.3590126  |

Median: 0.21687007947550468

Geo: 0.18081047887105914

| Term                             | Count | %     | PValue     |
|----------------------------------|-------|-------|------------|
| GO:0002376~immune system process | 11    | 7.24% | 0.0842084  |
| GO:0030097~hemopoiesis           | 4     | 2.63% | 0.19629554 |

|                                                 |   |       |            |
|-------------------------------------------------|---|-------|------------|
| GO:0002521~leukocyte differentiation            | 3 | 1.97% | 0.21687008 |
| GO:0048534~hemopoietic or lymphoid organ develo | 4 | 2.63% | 0.22454334 |
| GO:0002520~immune system development            | 4 | 2.63% | 0.24007799 |

Median: 0.1515089135837126

Geo: 0.18575887357629942

| Term                                        | Count | %     | PValue     |
|---------------------------------------------|-------|-------|------------|
| GO:0006665~sphingolipid metabolic process   | 3     | 1.97% | 0.0612205  |
| GO:0006643~membrane lipid metabolic process | 4     | 2.63% | 0.13724646 |
| GO:0044255~cellular lipid metabolic process | 8     | 5.26% | 0.15150891 |
| GO:0006629~lipid metabolic process          | 8     | 5.26% | 0.28070626 |
| GO:0008610~lipid biosynthetic process       | 3     | 1.97% | 0.61895567 |

Median: 0.31306330276550215

Geo: 0.20213993292493965

| Term                            | Count | %     | PValue     |
|---------------------------------|-------|-------|------------|
| GO:0009888~tissue development   | 8     | 5.26% | 0.03004377 |
| GO:0001501~skeletal development | 5     | 3.29% | 0.14566491 |
| GO:0001503~ossification         | 3     | 1.97% | 0.3130633  |
| GO:0031214~biomineral formation | 3     | 1.97% | 0.3130633  |
| GO:0046849~bone remodeling      | 3     | 1.97% | 0.38009492 |
| GO:0048771~tissue remodeling    | 3     | 1.97% | 0.41845332 |

Median: 0.22612678300387035

Geo: 0.20522610538248465

| Term                           | Count | %     | PValue     |
|--------------------------------|-------|-------|------------|
| GO:0007626~locomotory behavior | 4     | 2.63% | 0.16904168 |
| GO:0006935~chemotaxis          | 3     | 1.97% | 0.22612678 |
| GO:0042330~taxis               | 3     | 1.97% | 0.22612678 |

Median: 0.18718910532733748

Geo: 0.2140013630480883

| Term                                 | Count | %      | PValue     |
|--------------------------------------|-------|--------|------------|
| disulfide bond                       | 18    | 11.84% | 0.09644361 |
| GO:0005576~extracellular region      | 24    | 15.79% | 0.10978214 |
| GO:0044421~extracellular region part | 21    | 13.82% | 0.1520038  |
| GO:0005615~extracellular space       | 20    | 13.16% | 0.15518646 |
| signal                               | 18    | 11.84% | 0.21919175 |
| glycoprotein                         | 20    | 13.16% | 0.36803111 |
| Secreted                             | 9     | 5.92%  | 0.43196977 |
| signal peptide                       | 16    | 10.53% | 0.50542507 |

Median: 0.28744567816976296

Geo: 0.24435719127448727

| Term                                                | Count | %     | PValue     |
|-----------------------------------------------------|-------|-------|------------|
| IPR007087:Zinc finger, C2H2-type                    | 5     | 3.29% | 0.10183541 |
| IPR013087:Zinc finger, C2H2-type/integrase, DNA-bir | 3     | 1.97% | 0.22072902 |
| IPR015880:Zinc finger, C2H2-like                    | 3     | 1.97% | 0.35416233 |
| SM00355:ZnF_C2H2                                    | 3     | 1.97% | 0.44785751 |

Median: 0.35873012641214763

Geo: 0.2739158732596765

| Term                                        | Count | %     | PValue     |
|---------------------------------------------|-------|-------|------------|
| GO:0004857~enzyme inhibitor activity        | 5     | 3.29% | 0.1570748  |
| GO:0004866~endopeptidase inhibitor activity | 3     | 1.97% | 0.35873013 |

|                                                        |                          |        |            |
|--------------------------------------------------------|--------------------------|--------|------------|
| GO:0030414~protease inhibitor activity                 | 3                        | 1.97%  | 0.36473484 |
| Median: 0.25732520791296887                            | Geo: 0.3070428593235986  |        |            |
| Term                                                   | Count                    | %      | PValue     |
| GO:0006397~mRNA processing                             | 4                        | 2.63%  | 0.13533357 |
| GO:0005681~spliceosome                                 | 3                        | 1.97%  | 0.14319607 |
| GO:0016071~mRNA metabolic process                      | 4                        | 2.63%  | 0.19416055 |
| GO:0006396~RNA processing                              | 5                        | 3.29%  | 0.21707126 |
| GO:0008380~RNA splicing                                | 3                        | 1.97%  | 0.29757916 |
| GO:0044428~nuclear part                                | 7                        | 4.61%  | 0.61839088 |
| GO:0030529~ribonucleoprotein complex                   | 5                        | 3.29%  | 0.6720952  |
| GO:0003723~RNA binding                                 | 4                        | 2.63%  | 0.78198005 |
| Median: 0.3776840545803085                             | Geo: 0.35546088644285123 |        |            |
| Term                                                   | Count                    | %      | PValue     |
| Postsynaptic cell membrane                             | 3                        | 1.97%  | 0.24967477 |
| cell junction                                          | 4                        | 2.63%  | 0.37768405 |
| synapse                                                | 3                        | 1.97%  | 0.47629076 |
| Median: 0.4350696695030194                             | Geo: 0.3726779361542909  |        |            |
| Term                                                   | Count                    | %      | PValue     |
| lipoprotein                                            | 6                        | 3.95%  | 0.25929439 |
| Palmitate                                              | 3                        | 1.97%  | 0.43506967 |
| lipid moiety-binding region:S-palmitoyl cysteine       | 3                        | 1.97%  | 0.45882716 |
| Median: 0.6550347493280828                             | Geo: 0.3930222011751995  |        |            |
| Term                                                   | Count                    | %      | PValue     |
| GO:0051704~multi-organism process                      | 5                        | 3.29%  | 0.11907542 |
| GO:0022414~reproductive process                        | 3                        | 1.97%  | 0.65503475 |
| GO:0000003~reproduction                                | 4                        | 2.63%  | 0.77833184 |
| Median: 0.5887866746955883                             | Geo: 0.40006057508686044 |        |            |
| Term                                                   | Count                    | %      | PValue     |
| GO:0000287~magnesium ion binding                       | 8                        | 5.26%  | 0.00212904 |
| GO:0016301~kinase activity                             | 12                       | 7.89%  | 0.09401846 |
| magnesium                                              | 5                        | 3.29%  | 0.11028258 |
| GO:0016772~transferase activity, transferring phosphat | 12                       | 7.89%  | 0.20462216 |
| GO:0006793~phosphorus metabolic process                | 11                       | 7.24%  | 0.21298981 |
| GO:0006796~phosphate metabolic process                 | 11                       | 7.24%  | 0.21298981 |
| kinase                                                 | 7                        | 4.61%  | 0.24441827 |
| GO:0016773~phosphotransferase activity, alcohol gl     | 9                        | 5.92%  | 0.27451616 |
| SM00220:S_TKc                                          | 6                        | 3.95%  | 0.28396519 |
| GO:0016740~transferase activity                        | 17                       | 11.18% | 0.2851711  |
| IPR002290:Serine/threonine protein kinase              | 3                        | 1.97%  | 0.40439199 |
| GO:0004672~protein kinase activity                     | 7                        | 4.61%  | 0.44285187 |
| binding site:ATP                                       | 4                        | 2.63%  | 0.45273372 |
| IPR000719:Protein kinase, core                         | 4                        | 2.63%  | 0.5317224  |
| IPR008271:Serine/threonine protein kinase, active site | 3                        | 1.97%  | 0.55142859 |
| Serine/threonine-protein kinase                        | 3                        | 1.97%  | 0.57400518 |

|                                                     |    |       |            |
|-----------------------------------------------------|----|-------|------------|
| GO:0016310~phosphorylation                          | 7  | 4.61% | 0.60356817 |
| GO:0004674~protein serine/threonine kinase activity | 5  | 3.29% | 0.61344031 |
| GO:0006468~protein amino acid phosphorylation       | 6  | 3.95% | 0.62083328 |
| active site:Proton acceptor                         | 4  | 2.63% | 0.66904821 |
| domain:Protein kinase                               | 3  | 1.97% | 0.68221601 |
| nucleotide phosphate-binding region:ATP             | 4  | 2.63% | 0.68868595 |
| nucleotide-binding                                  | 8  | 5.26% | 0.69231599 |
| atp-binding                                         | 6  | 3.95% | 0.71410301 |
| GO:0005524~ATP binding                              | 9  | 5.92% | 0.82230441 |
| GO:0032559~adenyl ribonucleotide binding            | 9  | 5.92% | 0.83617534 |
| GO:0000166~nucleotide binding                       | 13 | 8.55% | 0.84942789 |
| transferase                                         | 6  | 3.95% | 0.87435008 |
| GO:0030554~adenyl nucleotide binding                | 9  | 5.92% | 0.87489505 |
| GO:0032555~purine ribonucleotide binding            | 10 | 6.58% | 0.90630926 |
| GO:0032553~ribonucleotide binding                   | 10 | 6.58% | 0.90630926 |
| GO:0017076~purine nucleotide binding                | 10 | 6.58% | 0.93066493 |

Median: 0.38568296458186957

Geo: 0.4004411400930015

| Term                     | Count | %     | PValue     |
|--------------------------|-------|-------|------------|
| GO:0005764~lysosome      | 3     | 1.97% | 0.38252226 |
| GO:0000323~lytic vacuole | 3     | 1.97% | 0.38568296 |
| GO:0005773~vacuole       | 3     | 1.97% | 0.43524009 |

Median: 0.6351311617719959

Geo: 0.4636426277900228

| Term                                                | Count | %      | PValue     |
|-----------------------------------------------------|-------|--------|------------|
| transducer                                          | 10    | 6.58%  | 0.02538471 |
| g-protein coupled receptor                          | 8     | 5.26%  | 0.09168277 |
| GO:0001653~peptide receptor activity                | 4     | 2.63%  | 0.09275957 |
| GO:0042277~peptide binding                          | 5     | 3.29%  | 0.09441662 |
| rno04080:Neuroactive ligand-receptor interaction    | 5     | 3.29%  | 0.23679494 |
| membrane                                            | 30    | 19.74% | 0.2394147  |
| IPR000276:Rhodopsin-like GPCR superfamily           | 7     | 4.61%  | 0.24170315 |
| G protein-coupled receptor                          | 3     | 1.97%  | 0.24587694 |
| GO:0005886~plasma membrane                          | 20    | 13.16% | 0.25253032 |
| glycoprotein                                        | 20    | 13.16% | 0.36803111 |
| receptor                                            | 12    | 7.89%  | 0.40674756 |
| GO:0044459~plasma membrane part                     | 14    | 9.21%  | 0.54022955 |
| GO:0005887~integral to plasma membrane              | 9     | 5.92%  | 0.56466453 |
| GO:0031226~intrinsic to plasma membrane             | 9     | 5.92%  | 0.58241564 |
| glycosylation site:N-linked (GlcNAc...)             | 17    | 11.18% | 0.61271877 |
| transmembrane                                       | 21    | 13.82% | 0.6131457  |
| transmembrane protein                               | 5     | 3.29%  | 0.65711662 |
| topological domain:Extracellular                    | 11    | 7.24%  | 0.6586014  |
| topological domain:Cytoplasmic                      | 13    | 8.55%  | 0.72610211 |
| GO:0007186~G-protein coupled receptor protein sig   | 16    | 10.53% | 0.74139492 |
| GO:0007166~cell surface receptor linked signal tran | 20    | 13.16% | 0.79394355 |
| transmembrane region                                | 15    | 9.87%  | 0.8266659  |
| GO:0004871~signal transducer activity               | 20    | 13.16% | 0.92876504 |
| GO:0060089~molecular transducer activity            | 20    | 13.16% | 0.92876504 |



|                                                |    |        |            |
|------------------------------------------------|----|--------|------------|
| GO:0004930~G-protein coupled receptor activity | 11 | 7.24%  | 0.96003914 |
| GO:0001584~rhodopsin-like receptor activity    | 9  | 5.92%  | 0.9810981  |
| GO:0004888~transmembrane receptor activity     | 12 | 7.89%  | 0.9839537  |
| GO:0004872~receptor activity                   | 15 | 9.87%  | 0.98458069 |
| GO:0016020~membrane                            | 41 | 26.97% | 0.9982432  |
| GO:0044425~membrane part                       | 31 | 20.39% | 0.99928109 |
| GO:0016021~integral to membrane                | 26 | 17.11% | 0.99967323 |
| GO:0031224~intrinsic to membrane               | 26 | 17.11% | 0.99970986 |

Median: 0.4708182436304623

Geo: 0.4660174692927841

| Term                                          | Count | %     | PValue     |
|-----------------------------------------------|-------|-------|------------|
| GO:0030135~coated vesicle                     | 3     | 1.97% | 0.38252226 |
| GO:0016023~cytoplasmic membrane-bound vesicle | 4     | 2.63% | 0.45233669 |
| GO:0031988~membrane-bound vesicle             | 4     | 2.63% | 0.47081824 |
| GO:0031410~cytoplasmic vesicle                | 4     | 2.63% | 0.49801369 |
| GO:0031982~vesicle                            | 4     | 2.63% | 0.54174871 |

Median: 0.5977868973943758

Geo: 0.5188412456329615

| Term                                    | Count | %      | PValue     |
|-----------------------------------------|-------|--------|------------|
| GO:0006396~RNA processing               | 5     | 3.29%  | 0.21707126 |
| GO:0043233~organelle lumen              | 8     | 5.26%  | 0.25090659 |
| GO:0031974~membrane-enclosed lumen      | 8     | 5.26%  | 0.25090659 |
| rna-binding                             | 3     | 1.97%  | 0.45932768 |
| GO:0031981~nuclear lumen                | 5     | 3.29%  | 0.54864712 |
| GO:0005654~nucleoplasm                  | 4     | 2.63%  | 0.57718292 |
| GO:0044428~nuclear part                 | 7     | 4.61%  | 0.61839088 |
| GO:0030529~ribonucleoprotein complex    | 5     | 3.29%  | 0.6720952  |
| GO:0044451~nucleoplasm part             | 3     | 1.97%  | 0.72030841 |
| GO:0044446~intracellular organelle part | 17    | 11.18% | 0.83082855 |
| GO:0044422~organelle part               | 17    | 11.18% | 0.83519455 |
| GO:0032991~macromolecular complex       | 15    | 9.87%  | 0.92160933 |

Median: 0.5316807174174902

Geo: 0.5256863931597372

| Term                             | Count | %     | PValue     |
|----------------------------------|-------|-------|------------|
| GO:0006954~inflammatory response | 4     | 2.63% | 0.47305709 |
| GO:0006950~response to stress    | 10    | 6.58% | 0.50424836 |
| GO:0006952~defense response      | 5     | 3.29% | 0.55911307 |
| GO:0009611~response to wounding  | 5     | 3.29% | 0.57259724 |

Median: 0.6050691824575416

Geo: 0.5538417602513612

| Term                          | Count | %     | PValue     |
|-------------------------------|-------|-------|------------|
| GO:0005739~mitochondrion      | 9     | 5.92% | 0.38018834 |
| GO:0044429~mitochondrial part | 4     | 2.63% | 0.60506918 |
| Mitochondrion                 | 4     | 2.63% | 0.7385047  |

Median: 0.6203505593051134

Geo: 0.5574080784731396

| Term                                          | Count | %     | PValue     |
|-----------------------------------------------|-------|-------|------------|
| GO:0005578~proteinaceous extracellular matrix | 4     | 2.63% | 0.34465906 |
| GO:0031012~extracellular matrix               | 4     | 2.63% | 0.36653473 |

|                                |   |       |            |
|--------------------------------|---|-------|------------|
| GO:0022610~biological adhesion | 4 | 2.63% | 0.87416638 |
| GO:0007155~cell adhesion       | 4 | 2.63% | 0.87416638 |

Median: 0.6077307778369707

Geo: 0.6401225395288845

| Term                                              | Count | %      | PValue     |
|---------------------------------------------------|-------|--------|------------|
| GO:0051179~localization                           | 25    | 16.45% | 0.45835904 |
| GO:0046907~intracellular transport                | 7     | 4.61%  | 0.47664479 |
| GO:0033036~macromolecule localization             | 7     | 4.61%  | 0.50456307 |
| GO:0006605~protein targeting                      | 3     | 1.97%  | 0.55097123 |
| GO:0051649~establishment of cellular localization | 8     | 5.26%  | 0.56384228 |
| GO:0051641~cellular localization                  | 8     | 5.26%  | 0.57663052 |
| GO:0008104~protein localization                   | 6     | 3.95%  | 0.63883103 |
| GO:0006886~intracellular protein transport        | 4     | 2.63%  | 0.64815115 |
| GO:0045184~establishment of protein localization  | 5     | 3.29%  | 0.7541813  |
| GO:0015031~protein transport                      | 4     | 2.63%  | 0.85437133 |
| GO:0051234~establishment of localization          | 16    | 10.53% | 0.92870858 |
| GO:0006810~transport                              | 14    | 9.21%  | 0.96737074 |

Median: 0.7180410061501701

Geo: 0.6532110505514424

| Term                               | Count | %     | PValue     |
|------------------------------------|-------|-------|------------|
| GO:0005506~iron ion binding        | 4     | 2.63% | 0.40215727 |
| iron                               | 3     | 1.97% | 0.58274416 |
| GO:0016491~oxidoreductase activity | 6     | 3.95% | 0.85333785 |
| oxidoreductase                     | 3     | 1.97% | 0.9103727  |

Median: 0.7898650649158409

Geo: 0.8021733696316998

| Term                              | Count | %     | PValue     |
|-----------------------------------|-------|-------|------------|
| GO:0006508~proteolysis            | 6     | 3.95% | 0.73437339 |
| GO:0008233~peptidase activity     | 5     | 3.29% | 0.78986506 |
| GO:0004175~endopeptidase activity | 3     | 1.97% | 0.88988704 |

Median: 0.970335217397613

Geo: 0.9247462277976668

| Term                                            | Count | %     | PValue     |
|-------------------------------------------------|-------|-------|------------|
| GO:0008092~cytoskeletal protein binding         | 3     | 1.97% | 0.79393513 |
| GO:0005856~cytoskeleton                         | 4     | 2.63% | 0.9623272  |
| GO:0043228~non-membrane-bound organelle         | 8     | 5.26% | 0.97834324 |
| GO:0043232~intracellular non-membrane-bound org | 8     | 5.26% | 0.97834324 |

Median: 0.9839158915997125

Geo: 0.9253029306672969

| Term                                               | Count | %     | PValue     |
|----------------------------------------------------|-------|-------|------------|
| GO:0015267~channel activity                        | 3     | 1.97% | 0.81163057 |
| GO:0022803~passive transmembrane transporter ac    | 3     | 1.97% | 0.81163057 |
| GO:0022857~transmembrane transporter activity      | 4     | 2.63% | 0.9832207  |
| GO:0005215~transporter activity                    | 6     | 3.95% | 0.98461108 |
| GO:0022892~substrate-specific transporter activity | 4     | 2.63% | 0.99122499 |
| GO:0022891~substrate-specific transmembrane trar   | 3     | 1.97% | 0.9928848  |

Median: 0.9998834069831795

Geo: 0.9976789972437883

| Term | Count | % | PValue |
|------|-------|---|--------|
|------|-------|---|--------|

|                                                   |   |       |            |
|---------------------------------------------------|---|-------|------------|
| GO:0007600~sensory perception                     | 7 | 4.61% | 0.99325095 |
| GO:0007608~sensory perception of smell            | 3 | 1.97% | 0.99988341 |
| GO:0007606~sensory perception of chemical stimuli | 3 | 1.97% | 0.99991743 |

Table S6

Median: 7.044309624431602E-9

Geo: 1.1045055549475803E-8

| Term                                      | Count | %      | PValue   |
|-------------------------------------------|-------|--------|----------|
| GO:0005622~intracellular                  | 501   | 44.81% | 1.21E-19 |
| GO:0044424~intracellular part             | 453   | 40.52% | 3.90E-14 |
| GO:0005737~cytoplasm                      | 291   | 26.03% | 8.02E-10 |
| GO:0043227~membrane-bound organelle       | 333   | 29.79% | 1.05E-09 |
| GO:0043231~intracellular membrane-bound c | 332   | 29.70% | 1.48E-09 |
| GO:0043226~organelle                      | 377   | 33.72% | 7.04E-09 |
| GO:0043229~intracellular organelle        | 376   | 33.63% | 8.62E-09 |
| GO:0044444~cytoplasmic part               | 215   | 19.23% | 2.79E-06 |
| GO:0005634~nucleus                        | 184   | 16.46% | 0.005189 |
| GO:0005623~cell                           | 652   | 58.32% | 0.006045 |
| GO:0044464~cell part                      | 651   | 58.23% | 0.009543 |

Median: 3.542056092261983E-5

Geo: 3.775890795601803E-5

| Term                                         | Count | %      | PValue   |
|----------------------------------------------|-------|--------|----------|
| GO:0016192~vesicle-mediated transport        | 55    | 4.92%  | 1.25E-07 |
| GO:0015031~protein transport                 | 64    | 5.72%  | 1.64E-07 |
| GO:0045184~establishment of protein localiz  | 67    | 5.99%  | 2.77E-07 |
| GO:0008104~protein localization              | 69    | 6.17%  | 7.17E-07 |
| GO:0033036~macromolecule localization        | 70    | 6.26%  | 1.71E-06 |
| GO:0006886~intracellular protein transport   | 47    | 4.20%  | 3.20E-06 |
| GO:0016043~cellular component organizator    | 181   | 16.19% | 6.81E-06 |
| GO:0046907~intracellular transport           | 64    | 5.72%  | 3.54E-05 |
| GO:0051649~establishment of cellular localiz | 74    | 6.62%  | 2.04E-04 |
| GO:0051641~cellular localization             | 74    | 6.62%  | 2.87E-04 |
| GO:0006810~transport                         | 169   | 15.12% | 5.43E-04 |
| GO:0051234~establishment of localization     | 174   | 15.56% | 6.17E-04 |
| GO:0051179~localization                      | 194   | 17.35% | 8.66E-04 |
| GO:0032940~secretion by cell                 | 26    | 2.33%  | 0.044288 |
| GO:0005215~transporter activity              | 81    | 7.25%  | 0.112579 |

Median: 0.0011776838916593433

Geo: 6.354060560924282E-4

| Term                                    | Count | %      | PValue   |
|-----------------------------------------|-------|--------|----------|
| GO:0031090~organelle membrane           | 61    | 5.46%  | 1.14E-04 |
| GO:0044422~organelle part               | 153   | 13.69% | 0.001178 |
| GO:0044446~intracellular organelle part | 151   | 13.51% | 0.001906 |

Median: 0.00409552834425737

Geo: 0.0011073699870049756

| Term                                         | Count | %     | PValue   |
|----------------------------------------------|-------|-------|----------|
| GO:0016791~phosphoric monoester hydrolas     | 31    | 2.77% | 5.27E-06 |
| GO:0042578~phosphoric ester hydrolase acti   | 35    | 3.13% | 2.72E-05 |
| GO:0016788~hydrolase activity, acting on est | 56    | 5.01% | 4.15E-05 |
| GO:0016311~dephosphorylation                 | 17    | 1.52% | 0.004096 |
| GO:0004721~phosphoprotein phosphatase ac     | 16    | 1.43% | 0.009877 |
| GO:0006470~protein amino acid dephosphory    | 14    | 1.25% | 0.022158 |
| GO:0004725~protein tyrosine phosphatase ac   | 6     | 0.54% | 0.383037 |

| Median: 0.003228915351500921                        | Geo: 0.0014419553823479551 |        |          |
|-----------------------------------------------------|----------------------------|--------|----------|
| Term                                                | Count                      | %      | PValue   |
| GO:0044238~primary metabolic process                | 417                        | 37.30% | 1.56E-05 |
| GO:0008152~metabolic process                        | 458                        | 40.97% | 2.05E-05 |
| GO:0044237~cellular metabolic process               | 411                        | 36.76% | 4.95E-05 |
| GO:0019538~protein metabolic process                | 218                        | 19.50% | 6.51E-04 |
| GO:0043170~macromolecule metabolic process          | 348                        | 31.13% | 0.002058 |
| GO:0009987~cellular process                         | 658                        | 58.86% | 0.002091 |
| GO:0044267~cellular protein metabolic process       | 199                        | 17.80% | 0.004366 |
| GO:0044260~cellular macromolecule metabolic process | 202                        | 18.07% | 0.004398 |
| GO:0043412~biopolymer modification                  | 104                        | 9.30%  | 0.010652 |
| GO:0006464~protein modification process             | 101                        | 9.03%  | 0.011152 |
| GO:0043283~biopolymer metabolic process             | 239                        | 21.38% | 0.015262 |
| GO:0043687~post-translational protein modification  | 81                         | 7.25%  | 0.052405 |

| Median: 0.0014458326006580122                                 | Geo: 0.0018374799149451773 |       |          |
|---------------------------------------------------------------|----------------------------|-------|----------|
| Term                                                          | Count                      | %     | PValue   |
| GO:0004437~inositol or phosphatidylinositol 4-kinase activity | 9                          | 0.81% | 2.56E-04 |
| GO:0042577~lipid phosphatase activity                         | 5                          | 0.45% | 0.001446 |
| GO:0004439~phosphoinositide 5-phosphatase activity            | 3                          | 0.27% | 0.016744 |

| Median: 0.023947488057755185          | Geo: 0.0019884476899413527 |       |          |
|---------------------------------------|----------------------------|-------|----------|
| Term                                  | Count                      | %     | PValue   |
| GO:0016192~vesicle-mediated transport | 55                         | 4.92% | 1.25E-07 |
| GO:0048193~Golgi vesicle transport    | 13                         | 1.16% | 0.007169 |
| GO:0045045~secretory pathway          | 24                         | 2.15% | 0.023947 |
| GO:0046903~secretion                  | 33                         | 2.95% | 0.032828 |
| GO:0032940~secretion by cell          | 26                         | 2.33% | 0.044288 |

| Median: 0.0016357492368776236   | Geo: 0.0032548360076113886 |       |          |
|---------------------------------|----------------------------|-------|----------|
| Term                            | Count                      | %     | PValue   |
| GO:0014069~postsynaptic density | 8                          | 0.72% | 5.29E-04 |
| GO:0042734~presynaptic membrane | 7                          | 0.63% | 0.001636 |
| GO:0032279~asymmetric synapse   | 3                          | 0.27% | 0.039821 |

| Median: 0.004086253621505005                    | Geo: 0.003681953265631834 |       |          |
|-------------------------------------------------|---------------------------|-------|----------|
| Term                                            | Count                     | %     | PValue   |
| GO:0006807~nitrogen compound metabolic process  | 44                        | 3.94% | 3.81E-04 |
| GO:0006519~amino acid and derivative metabolism | 38                        | 3.40% | 5.58E-04 |
| GO:0009308~amine metabolic process              | 41                        | 3.67% | 7.89E-04 |
| GO:0006520~amino acid metabolic process         | 27                        | 2.42% | 0.007384 |
| GO:0019752~carboxylic acid metabolic process    | 41                        | 3.67% | 0.044166 |
| GO:0006082~organic acid metabolic process       | 41                        | 3.67% | 0.04559  |

| Median: 0.0024659668666173417                 | Geo: 0.0038986907006064455 |       |          |
|-----------------------------------------------|----------------------------|-------|----------|
| Term                                          | Count                      | %     | PValue   |
| GO:0031988~membrane-bound vesicle             | 32                         | 2.86% | 2.95E-04 |
| GO:0016023~cytoplasmic membrane-bound vesicle | 30                         | 2.68% | 8.53E-04 |

|                                    |    |       |          |
|------------------------------------|----|-------|----------|
| GO:0031982~vesicle                 | 32 | 2.86% | 0.001726 |
| GO:0031410~cytoplasmic vesicle     | 30 | 2.68% | 0.002466 |
| GO:0030135~coated vesicle          | 17 | 1.52% | 0.008603 |
| GO:0030136~clathrin-coated vesicle | 15 | 1.34% | 0.011561 |
| GO:0008021~synaptic vesicle        | 8  | 0.72% | 0.128535 |

|                                           |                           |       |          |
|-------------------------------------------|---------------------------|-------|----------|
| Median: 0.005697269569420361              | Geo: 0.003905295818069365 |       |          |
| Term                                      | Count                     | %     | PValue   |
| GO:0012505~endomembrane system            | 41                        | 3.67% | 4.89E-04 |
| GO:0005789~endoplasmic reticulum membra   | 15                        | 1.34% | 0.004224 |
| GO:0042175~nuclear envelope-endoplasmic r | 15                        | 1.34% | 0.007171 |
| GO:0044432~endoplasmic reticulum part     | 16                        | 1.43% | 0.01569  |

|                                         |                            |       |          |
|-----------------------------------------|----------------------------|-------|----------|
| Median: 0.005800083031536231            | Geo: 0.0045423103766470746 |       |          |
| Term                                    | Count                      | %     | PValue   |
| GO:0065003~macromolecular complex assen | 42                         | 3.76% | 0.00193  |
| GO:0022607~cellular component assembly  | 43                         | 3.85% | 0.0058   |
| GO:0006461~protein complex assembly     | 26                         | 2.33% | 0.008372 |

|                                          |                           |        |          |
|------------------------------------------|---------------------------|--------|----------|
| Median: 0.003102987338819654             | Geo: 0.005413943633266698 |        |          |
| Term                                     | Count                     | %      | PValue   |
| GO:0000166~nucleotide binding            | 139                       | 12.43% | 4.33E-05 |
| GO:0032553~ribonucleotide binding        | 114                       | 10.20% | 6.94E-04 |
| GO:0032555~purine ribonucleotide binding | 114                       | 10.20% | 6.94E-04 |
| GO:0017076~purine nucleotide binding     | 116                       | 10.38% | 0.001642 |
| nucleotide-binding                       | 68                        | 6.08%  | 0.004564 |
| GO:0032559~adenyl ribonucleotide binding | 79                        | 7.07%  | 0.140823 |
| GO:0005524~ATP binding                   | 77                        | 6.89%  | 0.165516 |
| GO:0030554~adenyl nucleotide binding     | 81                        | 7.25%  | 0.202837 |

|                                               |                           |       |          |
|-----------------------------------------------|---------------------------|-------|----------|
| Median: 0.004872413994231359                  | Geo: 0.006380150986284573 |       |          |
| Term                                          | Count                     | %     | PValue   |
| GO:0004437~inositol or phosphatidylinositol p | 9                         | 0.81% | 2.56E-04 |
| SM00128:IPPC                                  | 5                         | 0.45% | 0.002727 |
| GO:0046030~inositol trisphosphate phosphat    | 4                         | 0.36% | 0.004872 |
| GO:0004445~inositol-polyphosphate 5-phosph    | 4                         | 0.36% | 0.004872 |
| IPR000300:Inositol polyphosphate related pho  | 4                         | 0.36% | 0.011463 |
| IPR005135:Endonuclease/exonuclease/phosph     | 4                         | 0.36% | 0.354689 |

|                                             |                          |       |          |
|---------------------------------------------|--------------------------|-------|----------|
| Median: 0.01031240595268623                 | Geo: 0.00687033963953285 |       |          |
| Term                                        | Count                    | %     | PValue   |
| GO:0007049~cell cycle                       | 50                       | 4.47% | 3.48E-04 |
| GO:0007050~cell cycle arrest                | 10                       | 0.89% | 0.002501 |
| GO:0045786~negative regulation of progress  | 15                       | 1.34% | 0.002807 |
| GO:0022402~cell cycle process               | 39                       | 3.49% | 0.008623 |
| GO:0000074~regulation of progression throug | 26                       | 2.33% | 0.012002 |
| GO:0051726~regulation of cell cycle         | 26                       | 2.33% | 0.013531 |
| GO:0000278~mitotic cell cycle               | 23                       | 2.06% | 0.017947 |

|                                                        |                           |        |          |
|--------------------------------------------------------|---------------------------|--------|----------|
| GO:0022403~cell cycle phase                            | 22                        | 1.97%  | 0.080816 |
| Median: 0.0028084324789411762                          | Geo: 0.008228285605659864 |        |          |
| Term                                                   | Count                     | %      | PValue   |
| GO:0048519~negative regulation of biological processes | 80                        | 7.16%  | 0.00239  |
| GO:0048523~negative regulation of cellular processes   | 75                        | 6.71%  | 0.002808 |
| GO:0009892~negative regulation of metabolic processes  | 28                        | 2.50%  | 0.082998 |
| Median: 0.012960373553618398                           | Geo: 0.008546649490151655 |        |          |
| Term                                                   | Count                     | %      | PValue   |
| GO:0006457~protein folding                             | 23                        | 2.06%  | 0.001451 |
| chaperone                                              | 10                        | 0.89%  | 0.011169 |
| GO:0051082~unfolded protein binding                    | 12                        | 1.07%  | 0.014752 |
| IPR002423:Chaperonin Cpn60/TCP-1                       | 4                         | 0.36%  | 0.022313 |
| Median: 0.9967247590148626                             | Geo: 0.01098528701294567  |        |          |
| Term                                                   | Count                     | %      | PValue   |
| GO:0007242~intracellular signaling cascade             | 114                       | 10.20% | 1.33E-06 |
| GO:0007154~cell communication                          | 218                       | 19.50% | 0.996725 |
| GO:0007165~signal transduction                         | 196                       | 17.53% | 0.997839 |
| Median: 0.040660299161142804                           | Geo: 0.012755242088997738 |        |          |
| Term                                                   | Count                     | %      | PValue   |
| GO:0016044~membrane organization and biogenesis        | 29                        | 2.59%  | 0.001255 |
| GO:0010324~membrane invagination                       | 16                        | 1.43%  | 0.04066  |
| GO:0006897~endocytosis                                 | 16                        | 1.43%  | 0.04066  |
| Median: 0.10964998236347706                            | Geo: 0.014021621729689819 |        |          |
| Term                                                   | Count                     | %      | PValue   |
| GO:0005525~GTP binding                                 | 37                        | 3.31%  | 7.53E-06 |
| GO:0032561~guanyl ribonucleotide binding               | 37                        | 3.31%  | 1.26E-05 |
| GO:0019001~guanyl nucleotide binding                   | 37                        | 3.31%  | 1.46E-05 |
| GTP-binding                                            | 26                        | 2.33%  | 2.21E-04 |
| GO:0003924~GTPase activity                             | 21                        | 1.88%  | 4.06E-04 |
| IPR005225:Small GTP-binding protein domain             | 15                        | 1.34%  | 0.007434 |
| IPR001806:Ras GTPase                                   | 15                        | 1.34%  | 0.007434 |
| nucleotide phosphate-binding region:GTP                | 14                        | 1.25%  | 0.023175 |
| lipid moiety-binding region:S-geranylgeranyl c         | 7                         | 0.63%  | 0.041332 |
| short sequence motif:Effector region                   | 7                         | 0.63%  | 0.062708 |
| GO:0017111~nucleoside-triphosphatase activity          | 37                        | 3.31%  | 0.10965  |
| GO:0016462~pyrophosphatase activity                    | 38                        | 3.40%  | 0.122742 |
| GO:0016818~hydrolase activity, acting on acids         | 38                        | 3.40%  | 0.12873  |
| GO:0016817~hydrolase activity, acting on acids         | 38                        | 3.40%  | 0.139562 |
| prenylation                                            | 8                         | 0.72%  | 0.152535 |
| IPR013753:Ras                                          | 9                         | 0.81%  | 0.152954 |
| PIRSF037165:ras protein                                | 3                         | 0.27%  | 0.159725 |
| propeptide:Removed in mature form                      | 9                         | 0.81%  | 0.175615 |
| Methylation                                            | 10                        | 0.89%  | 0.203346 |

|                                      |   |       |          |
|--------------------------------------|---|-------|----------|
| IPR003577:Ras small GTPase, Ras type | 3 | 0.27% | 0.297638 |
| SM00173:RAS                          | 3 | 0.27% | 0.305554 |

|                                              |                          |       |          |
|----------------------------------------------|--------------------------|-------|----------|
| Median: 0.01276382284052376                  | Geo: 0.01838815303424093 |       |          |
| Term                                         | Count                    | %     | PValue   |
| GO:0004774~succinate-CoA ligase activity     | 3                        | 0.27% | 0.008688 |
| GO:0016405~CoA-ligase activity               | 4                        | 0.36% | 0.010767 |
| GO:0016878~acid-thiol ligase activity        | 4                        | 0.36% | 0.014761 |
| GO:0016877~ligase activity, forming carbon-s | 4                        | 0.36% | 0.082806 |

|                                              |                           |       |          |
|----------------------------------------------|---------------------------|-------|----------|
| Median: 0.017439820365672112                 | Geo: 0.024768054688680787 |       |          |
| Term                                         | Count                     | %     | PValue   |
| IPR000504:RNA recognition motif, RNP-1       | 14                        | 1.25% | 0.012923 |
| rna-binding                                  | 18                        | 1.61% | 0.014434 |
| IPR012677:Nucleotide-binding, alpha-beta pla | 14                        | 1.25% | 0.01744  |
| SM00360:RRM                                  | 16                        | 1.43% | 0.042508 |
| GO:0003723~RNA binding                       | 36                        | 3.22% | 0.067407 |

|                                            |                         |       |          |
|--------------------------------------------|-------------------------|-------|----------|
| Median: 0.035923506232415525               | Geo: 0.0260307834995732 |       |          |
| Term                                       | Count                   | %     | PValue   |
| GO:0044271~nitrogen compound biosynthetic  | 13                      | 1.16% | 0.010719 |
| GO:0009309~amine biosynthetic process      | 10                      | 0.89% | 0.035924 |
| GO:0008652~amino acid biosynthetic process | 7                       | 0.63% | 0.045807 |

|                                 |                          |       |          |
|---------------------------------|--------------------------|-------|----------|
| Median: 0.020676498351106368    | Geo: 0.02792059126257564 |       |          |
| Term                            | Count                    | %     | PValue   |
| GO:0005794~Golgi apparatus      | 31                       | 2.77% | 0.015073 |
| GO:0044431~Golgi apparatus part | 19                       | 1.70% | 0.020676 |
| GO:0000139~Golgi membrane       | 12                       | 1.07% | 0.069837 |

|                                 |                          |       |          |
|---------------------------------|--------------------------|-------|----------|
| Median: 0.04179945450168271     | Geo: 0.02866270308739085 |       |          |
| Term                            | Count                    | %     | PValue   |
| GO:0051020~GTPase binding       | 11                       | 0.98% | 0.005704 |
| GO:0031267~small GTPase binding | 9                        | 0.81% | 0.0147   |
| GO:0017016~Ras GTPase binding   | 7                        | 0.63% | 0.068898 |
| GO:0017048~Rho GTPase binding   | 4                        | 0.36% | 0.116835 |

|                                            |                          |       |          |
|--------------------------------------------|--------------------------|-------|----------|
| Median: 0.05672383173871821                | Geo: 0.03746482697220645 |       |          |
| Term                                       | Count                    | %     | PValue   |
| GO:0007264~small GTPase mediated signal t  | 43                       | 3.85% | 9.56E-06 |
| GO:0005083~small GTPase regulator activity | 20                       | 1.79% | 7.72E-04 |
| GO:0030695~GTPase regulator activity       | 27                       | 2.42% | 0.002797 |
| GO:0005085~guanyl-nucleotide exchange fac  | 15                       | 1.34% | 0.007996 |
| GO:0051056~regulation of small GTPase med  | 17                       | 1.52% | 0.017757 |
| GO:0008047~enzyme activator activity       | 20                       | 1.79% | 0.02122  |
| GO:0005088~Ras guanyl-nucleotide exchange  | 9                        | 0.81% | 0.025163 |
| GO:0007265~Ras protein signal transduction | 17                       | 1.52% | 0.031174 |
| GO:0030234~enzyme regulator activity       | 47                       | 4.20% | 0.038539 |



|                                              |    |       |          |
|----------------------------------------------|----|-------|----------|
| GO:0046578~regulation of Ras protein signal  | 12 | 1.07% | 0.039714 |
| GO:0007266~Rho protein signal transduction   | 10 | 0.89% | 0.056724 |
| GO:0009966~regulation of signal transduction | 35 | 3.13% | 0.071205 |
| GO:0005089~Rho guanyl-nucleotide exchange    | 7  | 0.63% | 0.074098 |
| GO:0005096~GTPase activator activity         | 12 | 1.07% | 0.085486 |
| GO:0035023~regulation of Rho protein signal  | 7  | 0.63% | 0.112689 |
| IPR011993:Pleckstrin homology-type           | 12 | 1.07% | 0.182677 |
| IPR001849:Pleckstrin-like                    | 9  | 0.81% | 0.407613 |
| IPR000219:DH                                 | 3  | 0.27% | 0.415812 |
| SM00325:RhoGEF                               | 3  | 0.27% | 0.425544 |
| SM00233:PH                                   | 9  | 0.81% | 0.488891 |
| domain:PH                                    | 3  | 0.27% | 0.801822 |

Median: 0.05790452203551337

Geo: 0.03831891115558686

| Term                            | Count | %     | PValue   |
|---------------------------------|-------|-------|----------|
| GO:0044463~cell projection part | 14    | 1.25% | 0.004533 |
| GO:0043198~dendritic shaft      | 5     | 0.45% | 0.015482 |
| GO:0042995~cell projection      | 33    | 2.95% | 0.033403 |
| GO:0043197~dendritic spine      | 5     | 0.45% | 0.082407 |
| GO:0043005~neuron projection    | 18    | 1.61% | 0.125864 |
| GO:0030425~dendrite             | 11    | 0.98% | 0.130214 |

Median: 0.029417122574276287

Geo: 0.03899252756753423

| Term                                                   | Count | %     | PValue   |
|--------------------------------------------------------|-------|-------|----------|
| aminoacyl-tRNA synthetase                              | 6     | 0.54% | 0.018385 |
| GO:0043039~tRNA aminoacylation                         | 9     | 0.81% | 0.024262 |
| GO:0006418~tRNA aminoacylation for protein             | 9     | 0.81% | 0.024262 |
| GO:0043038~amino acid activation                       | 9     | 0.81% | 0.024262 |
| GO:0006399~tRNA metabolic process                      | 12    | 1.07% | 0.029253 |
| GO:0016875~ligase activity, forming carbon-carbon bond | 9     | 0.81% | 0.029581 |
| GO:0016876~ligase activity, forming aminoacyl-tRNA     | 9     | 0.81% | 0.029581 |
| GO:0004812~aminoacyl-tRNA ligase activity              | 9     | 0.81% | 0.029581 |
| rno00970:Aminoacyl-tRNA biosynthesis                   | 4     | 0.36% | 0.116794 |
| protein biosynthesis                                   | 11    | 0.98% | 0.349878 |

Median: 0.07501409807774695

Geo: 0.04573781156503287

| Term                                              | Count | %     | PValue   |
|---------------------------------------------------|-------|-------|----------|
| GO:0048193~Golgi vesicle transport                | 13    | 1.16% | 0.007169 |
| GO:0006888~ER to Golgi vesicle-mediated transport | 7     | 0.63% | 0.075014 |
| er-golgi transport                                | 5     | 0.45% | 0.177915 |

Median: 0.06899050268680867

Geo: 0.046416713865919654

| Term                                                 | Count | %     | PValue   |
|------------------------------------------------------|-------|-------|----------|
| outer membrane                                       | 6     | 0.54% | 0.010652 |
| GO:0019867~outer membrane                            | 9     | 0.81% | 0.020773 |
| GO:0005741~mitochondrial outer membrane              | 6     | 0.54% | 0.068991 |
| GO:0031968~organelle outer membrane                  | 6     | 0.54% | 0.118051 |
| topological domain:Mitochondrial intermembrane space | 4     | 0.36% | 0.119556 |

Median: 0.06513242583564044

Geo: 0.05036987687278405

| Term                                         | Count | %     | PValue   |
|----------------------------------------------|-------|-------|----------|
| GO:0016874~ligase activity                   | 34    | 3.04% | 1.59E-04 |
| GO:0016881~acid-amino acid ligase activity   | 15    | 1.34% | 0.04563  |
| GO:0019787~small conjugating protein ligase  | 14    | 1.25% | 0.046039 |
| GO:0016879~ligase activity, forming carbon-r | 17    | 1.52% | 0.047902 |
| GO:0004842~ubiquitin-protein ligase activity | 12    | 1.07% | 0.050809 |
| GO:0008639~small protein conjugating enzyr   | 12    | 1.07% | 0.065132 |
| GO:0006512~ubiquitin cycle                   | 21    | 1.88% | 0.111332 |
| GO:0016567~protein ubiquitination            | 8     | 0.72% | 0.143279 |
| GO:0000209~protein polyubiquitination        | 3     | 0.27% | 0.168192 |
| rno04120:Ubiquitin mediated proteolysis      | 12    | 1.07% | 0.18278  |
| GO:0032446~protein modification by small pr  | 8     | 0.72% | 0.204258 |

Median: 0.0316532809502792

Geo: 0.05575989202701649

| Term                                        | Count | %     | PValue   |
|---------------------------------------------|-------|-------|----------|
| GO:0048468~cell development                 | 89    | 7.96% | 0.005336 |
| GO:0042981~regulation of apoptosis          | 44    | 3.94% | 0.011114 |
| GO:0043067~regulation of programmed cell c  | 44    | 3.94% | 0.01401  |
| GO:0008219~cell death                       | 56    | 5.01% | 0.014591 |
| GO:0016265~death                            | 56    | 5.01% | 0.014591 |
| GO:0048869~cellular developmental process   | 110   | 9.84% | 0.021203 |
| GO:0030154~cell differentiation             | 110   | 9.84% | 0.021203 |
| GO:0006915~apoptosis                        | 52    | 4.65% | 0.028182 |
| GO:0012501~programmed cell death            | 52    | 4.65% | 0.035124 |
| GO:0043066~negative regulation of apoptosi  | 18    | 1.61% | 0.138967 |
| GO:0043069~negative regulation of program   | 18    | 1.61% | 0.146863 |
| GO:0006916~anti-apoptosis                   | 12    | 1.07% | 0.266561 |
| GO:0043065~positive regulation of apoptosis | 18    | 1.61% | 0.29451  |
| GO:0043068~positive regulation of programr  | 18    | 1.61% | 0.311435 |
| GO:0006917~induction of apoptosis           | 13    | 1.16% | 0.467993 |
| GO:0012502~induction of programmed cell d   | 13    | 1.16% | 0.475026 |

Median: 0.1562812317333729

Geo: 0.057707693908155444

| Term                                     | Count | %     | PValue   |
|------------------------------------------|-------|-------|----------|
| GO:0005856~cytoskeleton                  | 60    | 5.37% | 0.002472 |
| GO:0044430~cytoskeletal part             | 37    | 3.31% | 0.093461 |
| GO:0043232~intracellular non-membrane-bo | 88    | 7.87% | 0.219101 |
| GO:0043228~non-membrane-bound organell   | 88    | 7.87% | 0.219101 |

Median: 0.06825579194341394

Geo: 0.06084916171997176

| Term                                | Count | %     | PValue   |
|-------------------------------------|-------|-------|----------|
| IPR006689:ARF/SAR superfamily       | 5     | 0.45% | 0.041646 |
| IPR006688:ADP-ribosylation factor   | 4     | 0.36% | 0.066748 |
| SM00177:ARF                         | 4     | 0.36% | 0.069764 |
| PIRSF001711:ADP-ribosylation factor | 4     | 0.36% | 0.070693 |

Median: 0.142736866623424

Geo: 0.0615377040316669

| Term                                        | Count | %      | PValue   |
|---------------------------------------------|-------|--------|----------|
| GO:0065007~biological regulation            | 277   | 24.78% | 1.82E-05 |
| GO:0050789~regulation of biological process | 237   | 21.20% | 6.06E-04 |
| GO:0050794~regulation of cellular process   | 210   | 18.78% | 0.001453 |
| GO:0005634~nucleus                          | 184   | 16.46% | 0.005189 |
| GO:0003676~nucleic acid binding             | 160   | 14.31% | 0.018851 |
| GO:0019222~regulation of metabolic process  | 125   | 11.18% | 0.037235 |
| GO:0006139~nucleobase, nucleoside, nucleot  | 171   | 15.30% | 0.051081 |
| GO:0003677~DNA binding                      | 96    | 8.59%  | 0.081483 |
| GO:0031323~regulation of cellular metabolic | 115   | 10.29% | 0.098182 |
| GO:0010468~regulation of gene expression    | 107   | 9.57%  | 0.117897 |
| GO:0010467~gene expression                  | 153   | 13.69% | 0.133621 |
| GO:0016070~RNA metabolic process            | 116   | 10.38% | 0.151853 |
| Transcription regulation                    | 35    | 3.13%  | 0.152907 |
| Transcription                               | 35    | 3.13%  | 0.176114 |
| GO:0006350~transcription                    | 100   | 8.94%  | 0.289473 |
| GO:0045449~regulation of transcription      | 94    | 8.41%  | 0.302651 |
| GO:0019219~regulation of nucleobase, nucle  | 95    | 8.50%  | 0.390213 |
| GO:0006355~regulation of transcription, DNA | 84    | 7.51%  | 0.393237 |
| GO:0006351~transcription, DNA-dependent     | 86    | 7.69%  | 0.51837  |
| GO:0032774~RNA biosynthetic process         | 86    | 7.69%  | 0.526486 |
| GO:0030528~transcription regulator activity | 66    | 5.90%  | 0.563567 |
| GO:0003700~transcription factor activity    | 43    | 3.85%  | 0.721366 |

Median: 0.2068132443128243

Geo: 0.06384945590624247

| Term                                            | Count | %     | PValue   |
|-------------------------------------------------|-------|-------|----------|
| lipoprotein                                     | 35    | 3.13% | 0.004159 |
| lipid moiety-binding region:S-palmitoyl cysteir | 12    | 1.07% | 0.206813 |
| Palmitate                                       | 12    | 1.07% | 0.302654 |

Median: 0.05902448559063275

Geo: 0.06952667627562897

| Term                                    | Count | %      | PValue   |
|-----------------------------------------|-------|--------|----------|
| GO:0008270~zinc ion binding             | 90    | 8.05%  | 0.027333 |
| GO:0043167~ion binding                  | 172   | 15.38% | 0.047907 |
| GO:0046872~metal ion binding            | 167   | 14.94% | 0.059024 |
| GO:0046914~transition metal ion binding | 109   | 9.75%  | 0.084958 |
| GO:0043169~cation binding               | 150   | 13.42% | 0.247418 |

Median: 0.08069942792163615

Geo: 0.07022645291284828

| Term                                            | Count | %     | PValue   |
|-------------------------------------------------|-------|-------|----------|
| lipid moiety-binding region:N-myristoyl glycine | 9     | 0.81% | 0.01454  |
| myristate                                       | 9     | 0.81% | 0.017341 |
| myristylation                                   | 6     | 0.54% | 0.018385 |
| blocked amino end                               | 6     | 0.54% | 0.143013 |
| nucleotide binding                              | 6     | 0.54% | 0.406721 |
| P-loop                                          | 6     | 0.54% | 0.444845 |

Median: 0.052526849789520304                      Geo: 0.07343970394205135

| Term                                       | Count | %     | PValue   |
|--------------------------------------------|-------|-------|----------|
| GO:0006584~catecholamine metabolic proce   | 6     | 0.54% | 0.019824 |
| GO:0018958~phenol metabolic process        | 6     | 0.54% | 0.02286  |
| GO:0006576~biogenic amine metabolic proce  | 10    | 0.89% | 0.022861 |
| GO:0006575~amino acid derivative metabolic | 12    | 1.07% | 0.052527 |
| GO:0042133~neurotransmitter metabolic pro  | 5     | 0.45% | 0.181854 |
| GO:0042417~dopamine metabolic process      | 3     | 0.27% | 0.297004 |
| GO:0006725~aromatic compound metabolic p   | 10    | 0.89% | 0.392012 |

Median: 0.08857971092806124                      Geo: 0.07428537664101921

| Term                                          | Count | %     | PValue   |
|-----------------------------------------------|-------|-------|----------|
| rno04130:SNARE interactions in vesicular tran | 7     | 0.63% | 0.027406 |
| IPR006012:Syntaxin/epimorphin coiled-coil     | 4     | 0.36% | 0.046104 |
| domain:t-SNARE coiled-coil homology           | 4     | 0.36% | 0.053705 |
| IPR006011:Syntaxin, N-terminal                | 3     | 0.27% | 0.08858  |
| SM00503:SynN                                  | 3     | 0.27% | 0.091493 |
| IPR000727:Target SNARE coiled-coil region     | 4     | 0.36% | 0.147697 |
| SM00397:t_SNARE                               | 4     | 0.36% | 0.153687 |

Median: 0.062429438292995174                      Geo: 0.07578489960391194

| Term                                            | Count | %     | PValue   |
|-------------------------------------------------|-------|-------|----------|
| lipid moiety-binding region:N-myristoyl glycine | 9     | 0.81% | 0.01454  |
| myristate                                       | 9     | 0.81% | 0.017341 |
| calcium-binding region:1                        | 8     | 0.72% | 0.019181 |
| domain:EF-hand 3                                | 7     | 0.63% | 0.02202  |
| calcium-binding region:2                        | 7     | 0.63% | 0.046167 |
| IPR002048:Calcium-binding EF-hand               | 14    | 1.25% | 0.056269 |
| domain:EF-hand 2                                | 9     | 0.81% | 0.057434 |
| domain:EF-hand 4                                | 5     | 0.45% | 0.058266 |
| IPR011992:EF-Hand type                          | 14    | 1.25% | 0.062354 |
| SM00054:EFh                                     | 14    | 1.25% | 0.062505 |
| PIRSF002350:calmodulin                          | 4     | 0.36% | 0.070693 |
| domain:EF-hand 1                                | 8     | 0.72% | 0.090052 |
| calcium                                         | 30    | 2.68% | 0.152543 |
| calcium-binding region:3                        | 3     | 0.27% | 0.246277 |
| IPR001125:Recoverin                             | 3     | 0.27% | 0.273309 |
| Signal transduction mechanisms / Cytoskeleto    | 6     | 0.54% | 0.282244 |
| EF hand                                         | 4     | 0.36% | 0.294715 |
| calcium binding                                 | 5     | 0.45% | 0.346603 |

Median: 0.08419109283311178                      Geo: 0.07865101152463738

| Term                                | Count | %     | PValue   |
|-------------------------------------|-------|-------|----------|
| GO:0008289~lipid binding            | 27    | 2.42% | 0.034511 |
| GO:0005543~phospholipid binding     | 15    | 1.34% | 0.084191 |
| GO:0035091~phosphoinositide binding | 10    | 0.89% | 0.167453 |

Median: 0.06749757640491225                      Geo: 0.08163632183901466

| Term                              | Count | %     | PValue   |
|-----------------------------------|-------|-------|----------|
| GO:0006396~RNA processing         | 26    | 2.33% | 0.021741 |
| GO:0006397~mRNA processing        | 16    | 1.43% | 0.027483 |
| mrna processing                   | 10    | 0.89% | 0.03976  |
| GO:0016071~mRNA metabolic process | 16    | 1.43% | 0.095236 |
| mrna splicing                     | 6     | 0.54% | 0.279462 |
| GO:0008380~RNA splicing           | 9     | 0.81% | 0.468157 |

Median: 0.08367445242528601

Geo: 0.09325118835443283

| Term                                     | Count | %     | PValue   |
|------------------------------------------|-------|-------|----------|
| GO:0019226~transmission of nerve impulse | 39    | 3.49% | 0.008986 |
| GO:0007268~synaptic transmission         | 35    | 3.13% | 0.009379 |
| GO:0007267~cell-cell signaling           | 49    | 4.38% | 0.083674 |
| GO:0003008~system process                | 69    | 6.17% | 1        |
| GO:0050877~neurological system process   | 57    | 5.10% | 1        |

Median: 0.10197451032252433

Geo: 0.09443930654308128

| Term                                          | Count | %     | PValue   |
|-----------------------------------------------|-------|-------|----------|
| GO:0008285~negative regulation of cell prolif | 22    | 1.97% | 0.021171 |
| GO:0042127~regulation of cell proliferation   | 37    | 3.31% | 0.101975 |
| GO:0008283~cell proliferation                 | 45    | 4.03% | 0.390141 |

Median: 0.07380752782690993

Geo: 0.09919375989807463

| Term                                      | Count | %     | PValue   |
|-------------------------------------------|-------|-------|----------|
| GO:0006536~glutamate metabolic process    | 3     | 0.27% | 0.072716 |
| rno00251:Glutamate metabolism             | 5     | 0.45% | 0.073808 |
| GO:0009064~glutamine family amino acid me | 5     | 0.45% | 0.181854 |

Median: 0.15290711979150115

Geo: 0.10087618409325069

| Term                     | Count | %     | PValue   |
|--------------------------|-------|-------|----------|
| repressor                | 12    | 1.07% | 0.02792  |
| nucleus                  | 91    | 8.14% | 0.033644 |
| Transcription regulation | 35    | 3.13% | 0.152907 |
| Transcription            | 35    | 3.13% | 0.176114 |
| dna-binding              | 34    | 3.04% | 0.412953 |

Median: 0.1309296131274359

Geo: 0.10616709332351958

| Term          | Count | %     | PValue   |
|---------------|-------|-------|----------|
| domain:BAR    | 3     | 0.27% | 0.057758 |
| IPR004148:BAR | 3     | 0.27% | 0.13093  |
| SM00721:BAR   | 3     | 0.27% | 0.158241 |

Median: 0.10584057003619658

Geo: 0.10679216096906936

| Term                                     | Count | %     | PValue   |
|------------------------------------------|-------|-------|----------|
| GO:0005100~Rho GTPase activator activity | 4     | 0.36% | 0.053969 |
| GO:0005096~GTPase activator activity     | 12    | 1.07% | 0.085486 |
| GO:0043087~regulation of GTPase activity | 7     | 0.63% | 0.105841 |
| gtpase activation                        | 5     | 0.45% | 0.141009 |

GO:0005099~Ras GTPase activator activity 6 0.54% 0.201724

Median: 0.10189181414834529

Geo: 0.10949812218825965

| Term                                                             | Count | %     | PValue   |
|------------------------------------------------------------------|-------|-------|----------|
| GO:0019725~cellular homeostasis                                  | 29    | 2.59% | 0.014671 |
| GO:0042592~homeostatic process                                   | 36    | 3.22% | 0.02805  |
| GO:0006875~cellular metal ion homeostasis                        | 14    | 1.25% | 0.088302 |
| GO:0055065~metal ion homeostasis                                 | 14    | 1.25% | 0.088302 |
| GO:0006873~cellular ion homeostasis                              | 20    | 1.79% | 0.091552 |
| GO:0055082~cellular chemical homeostasis                         | 20    | 1.79% | 0.091552 |
| GO:0006874~cellular calcium ion homeostasis                      | 13    | 1.16% | 0.093013 |
| GO:0055074~calcium ion homeostasis                               | 13    | 1.16% | 0.093013 |
| GO:0065008~regulation of biological quality                      | 59    | 5.28% | 0.101892 |
| GO:0050801~ion homeostasis                                       | 21    | 1.88% | 0.117543 |
| GO:0030003~cellular cation homeostasis                           | 17    | 1.52% | 0.128115 |
| GO:0055080~cation homeostasis                                    | 17    | 1.52% | 0.128115 |
| GO:0048878~chemical homeostasis                                  | 22    | 1.97% | 0.204232 |
| GO:0030005~cellular di-, tri-valent inorganic cation homeostasis | 14    | 1.25% | 0.219321 |
| GO:0055066~di-, tri-valent inorganic cation homeostasis          | 14    | 1.25% | 0.219321 |
| GO:0007204~elevation of cytosolic calcium ion concentration      | 7     | 0.63% | 0.307615 |
| GO:0051480~cytosolic calcium ion homeostasis                     | 7     | 0.63% | 0.338314 |

Median: 0.10842151729013733

Geo: 0.11186370049581089

| Term                                                      | Count | %     | PValue   |
|-----------------------------------------------------------|-------|-------|----------|
| GO:0032012~regulation of ARF protein signal               | 3     | 0.27% | 0.108422 |
| GO:0032011~ARF protein signal transduction                | 3     | 0.27% | 0.108422 |
| GO:0005086~ARF guanyl-nucleotide exchange factor activity | 3     | 0.27% | 0.119079 |

Median: 0.1076855020720717

Geo: 0.11547631425780384

| Term                                                              | Count | %     | PValue   |
|-------------------------------------------------------------------|-------|-------|----------|
| rno00510:N-Glycan biosynthesis                                    | 8     | 0.72% | 0.013869 |
| GO:0009100~glycoprotein metabolic process                         | 13    | 1.16% | 0.054018 |
| rno01030:Glycan structures - biosynthesis 1                       | 12    | 1.07% | 0.088684 |
| GO:0016757~transferase activity, transferring glycosyl groups     | 17    | 1.52% | 0.098527 |
| GO:0006486~protein amino acid glycosylation                       | 10    | 0.89% | 0.107686 |
| GO:0043413~biopolymer glycosylation                               | 10    | 0.89% | 0.118084 |
| GO:0009101~glycoprotein biosynthetic process                      | 10    | 0.89% | 0.152395 |
| GO:0016758~transferase activity, transferring glycosyltransferase | 10    | 0.89% | 0.369148 |
| GO:0016758~transferase activity, transferring glycosyltransferase | 7     | 0.63% | 0.779679 |

Median: 0.1258641009200506

Geo: 0.11806714660258627

| Term                         | Count | %     | PValue   |
|------------------------------|-------|-------|----------|
| GO:0030424~axon              | 10    | 0.89% | 0.076941 |
| GO:0043005~neuron projection | 18    | 1.61% | 0.125864 |
| GO:0043025~cell soma         | 10    | 0.89% | 0.169952 |

Median: 0.1677959048829996

Geo: 0.11965887011097136

| Term | Count | % | PValue |
|------|-------|---|--------|
|------|-------|---|--------|

|                                            |    |       |          |
|--------------------------------------------|----|-------|----------|
| GO:0007010~cytoskeleton organization and t | 37 | 3.31% | 0.029817 |
| GO:0007015~actin filament organization     | 7  | 0.63% | 0.092817 |
| GO:0030036~actin cytoskeleton organization | 14 | 1.25% | 0.242775 |
| GO:0030029~actin filament-based process    | 14 | 1.25% | 0.305131 |

Median: 0.18185380918816363

Geo: 0.12058492068067901

| Term                                       | Count | %     | PValue   |
|--------------------------------------------|-------|-------|----------|
| GO:0008652~amino acid biosynthetic process | 7     | 0.63% | 0.045807 |
| GO:0009064~glutamine family amino acid me  | 5     | 0.45% | 0.181854 |
| GO:0009084~glutamine family amino acid bic | 3     | 0.27% | 0.210485 |

Median: 0.13346020508450196

Geo: 0.1210625157076649

| Term                                           | Count | %     | PValue   |
|------------------------------------------------|-------|-------|----------|
| GO:0051246~regulation of protein metabolic     | 22    | 1.97% | 0.040026 |
| GO:0022618~protein-RNA complex assembly        | 10    | 0.89% | 0.053362 |
| GO:0009889~regulation of biosynthetic proce    | 16    | 1.43% | 0.060281 |
| GO:0006413~translational initiation            | 7     | 0.63% | 0.092817 |
| GO:0008135~translation factor activity, nucle  | 9     | 0.81% | 0.104059 |
| GO:0003743~translation initiation factor activ | 6     | 0.54% | 0.129377 |
| GO:0006446~regulation of translational initia  | 5     | 0.45% | 0.137543 |
| GO:0022613~ribonucleoprotein complex biog      | 12    | 1.07% | 0.150133 |
| GO:0045182~translation regulator activity      | 9     | 0.81% | 0.175896 |
| GO:0031326~regulation of cellular biosynthes   | 12    | 1.07% | 0.207834 |
| initiation factor                              | 4     | 0.36% | 0.277076 |
| GO:0006417~regulation of translation           | 10    | 0.89% | 0.294521 |

Median: 0.1803019793844538

Geo: 0.12215092015596596

| Term                                          | Count | %     | PValue   |
|-----------------------------------------------|-------|-------|----------|
| GO:0051301~cell division                      | 16    | 1.43% | 0.002944 |
| GO:0000278~mitotic cell cycle                 | 23    | 2.06% | 0.017947 |
| GO:0022403~cell cycle phase                   | 22    | 1.97% | 0.080816 |
| cell cycle                                    | 15    | 1.34% | 0.121315 |
| cell division                                 | 9     | 0.81% | 0.125236 |
| GO:0051329~interphase of mitotic cell cycle   | 8     | 0.72% | 0.172594 |
| GO:0051325~interphase                         | 8     | 0.72% | 0.180302 |
| GO:0051318~G1 phase                           | 3     | 0.27% | 0.210485 |
| GO:0000279~M phase                            | 15    | 1.34% | 0.249235 |
| GO:0007067~mitosis                            | 11    | 0.98% | 0.302128 |
| mitosis                                       | 5     | 0.45% | 0.302678 |
| GO:0000087~M phase of mitotic cell cycle      | 11    | 0.98% | 0.332362 |
| GO:0000082~G1/S transition of mitotic cell cy | 4     | 0.36% | 0.418699 |

Median: 0.11267688765907659

Geo: 0.1268010744333647

| Term                                         | Count | %     | PValue   |
|----------------------------------------------|-------|-------|----------|
| GO:0035258~steroid hormone receptor bindir   | 5     | 0.45% | 0.025487 |
| GO:0030518~steroid hormone receptor signa    | 6     | 0.54% | 0.047282 |
| GO:0050681~androgen receptor binding         | 4     | 0.36% | 0.053969 |
| GO:0003713~transcription coactivator activit | 14    | 1.25% | 0.060449 |

|                                              |    |       |          |
|----------------------------------------------|----|-------|----------|
| GO:0030522~intracellular receptor-mediated   | 6  | 0.54% | 0.097158 |
| GO:0030521~androgen receptor signaling pa    | 4  | 0.36% | 0.128196 |
| GO:0035257~nuclear hormone receptor bindi    | 6  | 0.54% | 0.211598 |
| GO:0051427~hormone receptor binding          | 6  | 0.54% | 0.242086 |
| GO:0046966~thyroid hormone receptor bindii   | 3  | 0.27% | 0.610061 |
| GO:0045944~positive regulation of transcript | 10 | 0.89% | 0.702208 |

Median: 0.10065090511468879

Geo: 0.1276364001100667

| Term                                         | Count | %     | PValue   |
|----------------------------------------------|-------|-------|----------|
| pyridoxal phosphate                          | 7     | 0.63% | 0.047012 |
| GO:0008483~transaminase activity             | 5     | 0.45% | 0.051374 |
| aminotransferase                             | 4     | 0.36% | 0.076229 |
| GO:0016769~transferase activity, transferrin | 5     | 0.45% | 0.095855 |
| IPR015421:Pyridoxal phosphate-dependent tr   | 5     | 0.45% | 0.100651 |
| GO:0019842~vitamin binding                   | 10    | 0.89% | 0.155451 |
| GO:0030170~pyridoxal phosphate binding       | 5     | 0.45% | 0.256409 |
| binding site:Pyridoxal phosphate (covalent)  | 4     | 0.36% | 0.258983 |
| GO:0048037~cofactor binding                  | 14    | 1.25% | 0.490306 |

Median: 0.09004221777709542

Geo: 0.13237772337733444

| Term                                        | Count | %     | PValue   |
|---------------------------------------------|-------|-------|----------|
| GO:0048583~regulation of response to stimul | 9     | 0.81% | 0.01677  |
| GO:0032107~regulation of response to nutrie | 3     | 0.27% | 0.072716 |
| GO:0032104~regulation of response to extrac | 3     | 0.27% | 0.072716 |
| GO:0032095~regulation of response to food   | 3     | 0.27% | 0.072716 |
| GO:0032101~regulation of response to exterr | 3     | 0.27% | 0.090042 |
| GO:0032094~response to food                 | 3     | 0.27% | 0.127677 |
| GO:0031667~response to nutrient levels      | 8     | 0.72% | 0.507172 |
| GO:0009991~response to extracellular stimul | 8     | 0.72% | 0.552089 |
| GO:0007584~response to nutrient             | 6     | 0.54% | 0.601449 |

Median: 0.24146442504751328

Geo: 0.1327707699357756

| Term                                       | Count | %      | PValue   |
|--------------------------------------------|-------|--------|----------|
| GO:0032502~developmental process           | 184   | 16.46% | 0.015368 |
| GO:0048869~cellular developmental process  | 110   | 9.84%  | 0.021203 |
| GO:0030154~cell differentiation            | 110   | 9.84%  | 0.021203 |
| GO:0007275~multicellular organismal develo | 131   | 11.72% | 0.100626 |
| GO:0048856~anatomical structure developm   | 118   | 10.55% | 0.382303 |
| GO:0048731~system development              | 101   | 9.03%  | 0.421206 |
| GO:0048513~organ development               | 65    | 5.81%  | 0.862571 |
| GO:0032501~multicellular organismal proces | 185   | 16.55% | 0.999998 |

Median: 0.17519858930582505

Geo: 0.1329722840960057

| Term                                       | Count | %     | PValue   |
|--------------------------------------------|-------|-------|----------|
| GO:0006626~protein targeting to mitochondr | 5     | 0.45% | 0.017079 |
| GO:0006839~mitochondrial transport         | 6     | 0.54% | 0.082855 |
| GO:0007005~mitochondrion organization and  | 7     | 0.63% | 0.267542 |
| GO:0044455~mitochondrial membrane part     | 3     | 0.27% | 0.825805 |



Median: 0.10305094387637022

Geo: 0.1330202062600308

| Term                                          | Count | %     | PValue   |
|-----------------------------------------------|-------|-------|----------|
| GO:0001937~negative regulation of endothel    | 3     | 0.27% | 0.090042 |
| GO:0001935~endothelial cell proliferation     | 4     | 0.36% | 0.103051 |
| GO:0001936~regulation of endothelial cell pro | 3     | 0.27% | 0.253662 |

Median: 0.11990710670990666

Geo: 0.13685778237651414

| Term                                         | Count | %     | PValue   |
|----------------------------------------------|-------|-------|----------|
| GO:0007187~G-protein signaling, coupled to   | 14    | 1.25% | 0.031366 |
| GO:0019935~cyclic-nucleotide-mediated sign   | 14    | 1.25% | 0.065869 |
| GO:0007188~G-protein signaling, coupled to   | 11    | 0.98% | 0.066354 |
| GO:0045761~regulation of adenylate cyclase   | 6     | 0.54% | 0.097158 |
| GO:0051339~regulation of lyase activity      | 6     | 0.54% | 0.11262  |
| GO:0031279~regulation of cyclase activity    | 6     | 0.54% | 0.11262  |
| GO:0019933~cAMP-mediated signaling           | 11    | 0.98% | 0.127194 |
| GO:0007190~adenylate cyclase activation      | 4     | 0.36% | 0.213759 |
| GO:0051349~positive regulation of lyase acti | 4     | 0.36% | 0.244569 |
| GO:0045762~positive regulation of adenylate  | 4     | 0.36% | 0.244569 |
| GO:0031281~positive regulation of cyclase ac | 4     | 0.36% | 0.260231 |
| GO:0007189~G-protein signaling, adenylate c  | 4     | 0.36% | 0.603889 |

Median: 0.0908459699550602

Geo: 0.13704169444018185

| Term                                         | Count | %     | PValue   |
|----------------------------------------------|-------|-------|----------|
| IPR003958:Transcription factor CBF/NF-Y/arch | 3     | 0.27% | 0.035936 |
| IPR009072:Histone-fold                       | 4     | 0.36% | 0.090846 |
| Transcription                                | 3     | 0.27% | 0.788366 |

Median: 0.13734646667265776

Geo: 0.14002507969953631

| Term                                         | Count | %     | PValue   |
|----------------------------------------------|-------|-------|----------|
| GO:0005798~Golgi-associated vesicle          | 8     | 0.72% | 0.034523 |
| GO:0012506~vesicle membrane                  | 11    | 0.98% | 0.037788 |
| IPR008152:Clathrin adaptor, alpha/beta/gamn  | 3     | 0.27% | 0.051649 |
| SM00809:Alpha_adaptinC2                      | 3     | 0.27% | 0.053424 |
| GO:0030659~cytoplasmic vesicle membrane      | 8     | 0.72% | 0.092881 |
| GO:0030133~transport vesicle                 | 6     | 0.54% | 0.095371 |
| GO:0044433~cytoplasmic vesicle part          | 9     | 0.81% | 0.109754 |
| GO:0048475~coated membrane                   | 6     | 0.54% | 0.134454 |
| GO:0030117~membrane coat                     | 6     | 0.54% | 0.134454 |
| GO:0030118~clathrin coat                     | 5     | 0.45% | 0.137346 |
| GO:0030140~trans-Golgi network transport v   | 4     | 0.36% | 0.159338 |
| GO:0030130~clathrin coat of trans-Golgi netw | 3     | 0.27% | 0.201342 |
| GO:0030120~vesicle coat                      | 5     | 0.45% | 0.239078 |
| GO:0012510~trans-Golgi network transport v   | 3     | 0.27% | 0.243116 |
| GO:0030125~clathrin vesicle coat             | 4     | 0.36% | 0.276901 |
| GO:0030662~coated vesicle membrane           | 5     | 0.45% | 0.288866 |
| GO:0030665~clathrin coated vesicle membra    | 4     | 0.36% | 0.307779 |
| GO:0030658~transport vesicle membrane        | 3     | 0.27% | 0.368185 |

GO:0030660~Golgi-associated vesicle membr 3 0.27% 0.408313

Median: 0.1361326064824238

Geo: 0.1440097981822845

| Term                                          | Count | %     | PValue   |
|-----------------------------------------------|-------|-------|----------|
| GO:0002761~regulation of myeloid leukocyte    | 6     | 0.54% | 0.008587 |
| GO:0002762~negative regulation of myeloid l   | 4     | 0.36% | 0.016525 |
| GO:0045637~regulation of myeloid cell differ  | 7     | 0.63% | 0.024981 |
| GO:0002573~myeloid leukocyte differentiatio   | 6     | 0.54% | 0.063669 |
| GO:0045638~negative regulation of myeloid c   | 4     | 0.36% | 0.069637 |
| GO:0045670~regulation of osteoclast differen  | 4     | 0.36% | 0.069637 |
| GO:0030316~osteoclast differentiation         | 4     | 0.36% | 0.091299 |
| GO:0048534~hemopoietic or lymphoid organ      | 17    | 1.52% | 0.093025 |
| GO:0030097~hemopoiesis                        | 16    | 1.43% | 0.098623 |
| GO:0002520~immune system development          | 17    | 1.52% | 0.116874 |
| GO:0051093~negative regulation of developn    | 9     | 0.81% | 0.136133 |
| GO:0030099~myeloid cell differentiation       | 9     | 0.81% | 0.155467 |
| GO:0045639~positive regulation of myeloid c   | 3     | 0.27% | 0.253662 |
| GO:0050793~regulation of developmental prc    | 20    | 1.79% | 0.270145 |
| GO:0051094~positive regulation of developm    | 8     | 0.72% | 0.319107 |
| GO:0045596~negative regulation of cell differ | 6     | 0.54% | 0.33732  |
| GO:0002521~leukocyte differentiation          | 8     | 0.72% | 0.385125 |
| GO:0045595~regulation of cell differentiation | 12    | 1.07% | 0.477352 |
| GO:0045597~positive regulation of cell differ | 4     | 0.36% | 0.754627 |
| GO:0045165~cell fate commitment               | 3     | 0.27% | 0.955029 |
| GO:0002376~immune system process              | 33    | 2.95% | 0.956468 |

Median: 0.3508793236375377

Geo: 0.14658367233857106

| Term                                        | Count | %     | PValue   |
|---------------------------------------------|-------|-------|----------|
| GO:0048489~synaptic vesicle transport       | 9     | 0.81% | 0.004764 |
| GO:0001505~regulation of neurotransmitter l | 13    | 1.16% | 0.089241 |
| GO:0016079~synaptic vesicle exocytosis      | 4     | 0.36% | 0.16939  |
| GO:0003001~generation of a signal involved  | 10    | 0.89% | 0.350879 |
| GO:0045055~regulated secretory pathway      | 8     | 0.72% | 0.356681 |
| GO:0007269~neurotransmitter secretion       | 7     | 0.63% | 0.390062 |
| GO:0006887~exocytosis                       | 8     | 0.72% | 0.413622 |

Median: 0.43415643114745134

Geo: 0.14675904481537738

| Term                                        | Count | %     | PValue   |
|---------------------------------------------|-------|-------|----------|
| GO:0048583~regulation of response to stimul | 9     | 0.81% | 0.01677  |
| GO:0031347~regulation of defense response   | 4     | 0.36% | 0.434156 |
| GO:0050727~regulation of inflammatory resp  | 4     | 0.36% | 0.434156 |

Median: 0.24998858310372712

Geo: 0.15290988756460436

| Term                  | Count | %     | PValue   |
|-----------------------|-------|-------|----------|
| wd repeat             | 13    | 1.16% | 0.025128 |
| IPR001680:WD40 repeat | 13    | 1.16% | 0.035564 |
| SM00320:WD40          | 13    | 1.16% | 0.053411 |
| repeat:WD 6           | 5     | 0.45% | 0.170135 |

|             |   |       |          |
|-------------|---|-------|----------|
| repeat:WD 5 | 5 | 0.45% | 0.242372 |
| repeat:WD 4 | 5 | 0.45% | 0.257606 |
| repeat:WD 3 | 5 | 0.45% | 0.288595 |
| repeat:WD 2 | 5 | 0.45% | 0.304286 |
| repeat:WD 1 | 5 | 0.45% | 0.304286 |
| repeat:WD 7 | 3 | 0.27% | 0.5158   |

Median: 0.15565765283845925

Geo: 0.1529854602605251

| Term                                     | Count | %     | PValue   |
|------------------------------------------|-------|-------|----------|
| GO:0051186~cofactor metabolic process    | 20    | 1.79% | 0.055485 |
| GO:0006732~coenzyme metabolic process    | 17    | 1.52% | 0.067256 |
| GO:0051188~cofactor biosynthetic process | 9     | 0.81% | 0.244059 |
| GO:0009108~coenzyme biosynthetic process | 6     | 0.54% | 0.601449 |

Median: 0.15899314901573366

Geo: 0.15637827340600607

| Term                                       | Count | %     | PValue   |
|--------------------------------------------|-------|-------|----------|
| GO:0000302~response to reactive oxygen sp  | 6     | 0.54% | 0.069757 |
| GO:0009725~response to hormone stimulus    | 15    | 1.34% | 0.083759 |
| GO:0043627~response to estrogen stimulus   | 6     | 0.54% | 0.146779 |
| GO:0006979~response to oxidative stress    | 10    | 0.89% | 0.171207 |
| GO:0042542~response to hydrogen peroxide   | 4     | 0.36% | 0.183882 |
| GO:0048545~response to steroid hormone sti | 7     | 0.63% | 0.541646 |

Median: 0.3508793236375377

Geo: 0.1679204348599385

| Term                                          | Count | %     | PValue   |
|-----------------------------------------------|-------|-------|----------|
| GO:0065009~regulation of a molecular functi   | 40    | 3.58% | 0.01017  |
| GO:0050790~regulation of catalytic activity   | 36    | 3.22% | 0.012368 |
| GO:0043085~positive regulation of catalytic a | 22    | 1.97% | 0.029565 |
| GO:0043549~regulation of kinase activity      | 17    | 1.52% | 0.156675 |
| GO:0051338~regulation of transferase activit  | 17    | 1.52% | 0.188353 |
| GO:0045859~regulation of protein kinase acti  | 16    | 1.43% | 0.201339 |
| GO:0033674~positive regulation of kinase act  | 10    | 0.89% | 0.350879 |
| GO:0051347~positive regulation of transferas  | 10    | 0.89% | 0.392012 |
| GO:0007200~G-protein signaling, coupled to    | 7     | 0.63% | 0.400431 |
| GO:0032147~activation of protein kinase acti  | 5     | 0.45% | 0.438703 |
| GO:0045860~positive regulation of protein ki  | 9     | 0.81% | 0.459439 |
| GO:0007205~protein kinase C activation        | 3     | 0.27% | 0.553633 |
| GO:0000165~MAPKKK cascade                     | 10    | 0.89% | 0.621474 |

Median: 0.200554335921077

Geo: 0.16822064139055293

| Term                                        | Count | %     | PValue   |
|---------------------------------------------|-------|-------|----------|
| PIRSF001741:membrane-associated guanylate   | 3     | 0.27% | 0.023567 |
| SM00072:GuKc                                | 5     | 0.45% | 0.026247 |
| GO:0008022~protein C-terminus binding       | 8     | 0.72% | 0.029859 |
| domain:Guanylate kinase-like                | 3     | 0.27% | 0.057758 |
| domain:SH3                                  | 7     | 0.63% | 0.075448 |
| IPR008145:Guanylate kinase/L-type calcium c | 4     | 0.36% | 0.07839  |
| domain:PDZ 3                                | 3     | 0.27% | 0.121188 |

|                                         |   |       |          |
|-----------------------------------------|---|-------|----------|
| GO:0030165~PDZ domain binding           | 6 | 0.54% | 0.17311  |
| IPR008144:Guanylate kinase domain:PDZ 1 | 3 | 0.27% | 0.200554 |
| domain:PDZ 2                            | 3 | 0.27% | 0.29823  |
| IPR000108:Neutrophil cytosol factor 2   | 3 | 0.27% | 0.345817 |
| IPR001452:Src homology-3                | 9 | 0.81% | 0.397693 |
| SM00326:SH3                             | 9 | 0.81% | 0.46892  |
| SH3 domain                              | 8 | 0.72% | 0.47937  |
| IPR001478:PDZ/DHR/GLGF                  | 3 | 0.27% | 0.971386 |
| SM00228:PDZ                             | 3 | 0.27% | 0.975655 |

Median: 0.10305094387637022

Geo: 0.1746413970914796

| Term                                       | Count | %     | PValue   |
|--------------------------------------------|-------|-------|----------|
| GO:0010003~gastrulation (sensu Mammalia)   | 4     | 0.36% | 0.042285 |
| GO:0001702~gastrulation with mouth forming | 4     | 0.36% | 0.103051 |
| GO:0048276~gastrulation (sensu Vertebrata) | 4     | 0.36% | 0.103051 |
| GO:0007369~gastrulation                    | 4     | 0.36% | 0.479537 |
| GO:0003002~regionalization                 | 6     | 0.54% | 0.754437 |

Median: 0.146778845974888

Geo: 0.175730085063464

| Term                                        | Count | %     | PValue   |
|---------------------------------------------|-------|-------|----------|
| GO:0014070~response to organic cyclic subst | 6     | 0.54% | 0.076153 |
| GO:0043627~response to estrogen stimulus    | 6     | 0.54% | 0.146779 |
| GO:0042493~response to drug                 | 9     | 0.81% | 0.485498 |

Median: 0.2310913261201935

Geo: 0.17766634724831248

| Term                        | Count | %     | PValue   |
|-----------------------------|-------|-------|----------|
| GO:0008270~zinc ion binding | 90    | 8.05% | 0.027333 |
| zinc-finger                 | 34    | 3.04% | 0.155905 |
| zinc                        | 45    | 4.03% | 0.306277 |
| metal-binding               | 60    | 5.37% | 0.763395 |

Median: 0.21535379537979749

Geo: 0.17768583122794948

| Term                                        | Count | %     | PValue   |
|---------------------------------------------|-------|-------|----------|
| GO:0016323~basolateral plasma membrane      | 13    | 1.16% | 0.010827 |
| GO:0005912~adherens junction                | 9     | 0.81% | 0.055736 |
| GO:0005925~focal adhesion                   | 5     | 0.45% | 0.158264 |
| GO:0005924~cell-substrate adherens junction | 5     | 0.45% | 0.191629 |
| GO:0030055~cell-matrix junction             | 5     | 0.45% | 0.239078 |
| GO:0005913~cell-cell adherens junction      | 3     | 0.27% | 0.447158 |
| GO:0030054~cell junction                    | 11    | 0.98% | 0.58202  |
| GO:0005911~intercellular junction           | 6     | 0.54% | 0.872536 |

Median: 0.15546695149387

Geo: 0.17829203345072625

| Term                                      | Count | %     | PValue   |
|-------------------------------------------|-------|-------|----------|
| GO:0005184~neuropeptide hormone activity  | 5     | 0.45% | 0.057794 |
| GO:0007218~neuropeptide signaling pathway | 9     | 0.81% | 0.155467 |
| GO:0005179~hormone activity               | 8     | 0.72% | 0.630778 |

Median: 0.1719070097875019

Geo: 0.17861075696769138

| Term                                         | Count | %     | PValue   |
|----------------------------------------------|-------|-------|----------|
| serine/threonine-specific protein kinase     | 6     | 0.54% | 0.054413 |
| PIRSF000564:kinase-related transforming prot | 4     | 0.36% | 0.171907 |
| rno04340:Hedgehog signaling pathway          | 4     | 0.36% | 0.609158 |

Median: 0.48112562038876727

Geo: 0.1787057436525346

| Term                                         | Count | %     | PValue   |
|----------------------------------------------|-------|-------|----------|
| GO:0044456~synapse part                      | 19    | 1.70% | 2.22E-04 |
| GO:0045202~synapse                           | 27    | 2.42% | 3.62E-04 |
| GO:0045211~postsynaptic membrane             | 12    | 1.07% | 0.018502 |
| GO:0008144~drug binding                      | 4     | 0.36% | 0.240467 |
| synapse                                      | 13    | 1.16% | 0.283011 |
| Postsynaptic cell membrane                   | 8     | 0.72% | 0.384888 |
| GO:0030534~adult behavior                    | 4     | 0.36% | 0.403104 |
| neurotransmitter receptor                    | 5     | 0.45% | 0.462802 |
| GO:0005230~extracellular ligand-gated ion ch | 5     | 0.45% | 0.481126 |
| GO:0030594~neurotransmitter receptor activ   | 7     | 0.63% | 0.565097 |
| cell junction                                | 14    | 1.25% | 0.609355 |
| GO:0042165~neurotransmitter binding          | 7     | 0.63% | 0.642168 |
| IPR006202:Neurotransmitter-gated ion-chann   | 3     | 0.27% | 0.748186 |
| IPR006029:Neurotransmitter-gated ion-chann   | 3     | 0.27% | 0.748186 |
| IPR006201:Neurotransmitter-gated ion-chann   | 3     | 0.27% | 0.748186 |
| GO:0015276~ligand-gated ion channel activit  | 5     | 0.45% | 0.772342 |
| GO:0022834~ligand-gated channel activity     | 5     | 0.45% | 0.772342 |

Median: 0.1803019793844538

Geo: 0.18582633481789906

| Term                                         | Count | %     | PValue   |
|----------------------------------------------|-------|-------|----------|
| GO:0007270~nerve-nerve synaptic transmiss    | 6     | 0.54% | 0.097158 |
| GO:0007612~learning                          | 5     | 0.45% | 0.107637 |
| GO:0048169~regulation of long-term neuron    | 3     | 0.27% | 0.147649 |
| GO:0007611~learning and/or memory            | 8     | 0.72% | 0.180302 |
| GO:0048167~regulation of synaptic plasticity | 6     | 0.54% | 0.194764 |
| GO:0050803~regulation of synapse structure   | 6     | 0.54% | 0.247342 |
| GO:0048168~regulation of neuronal synaptic   | 3     | 0.27% | 0.57052  |

Median: 0.21008051367698122

Geo: 0.18658182674770896

| Term                                        | Count | %     | PValue   |
|---------------------------------------------|-------|-------|----------|
| GO:0006605~protein targeting                | 20    | 1.79% | 0.046078 |
| GO:0017038~protein import                   | 9     | 0.81% | 0.142436 |
| GO:0006913~nucleocytoplasmic transport      | 11    | 0.98% | 0.184392 |
| GO:0051169~nuclear transport                | 11    | 0.98% | 0.210081 |
| GO:0006606~protein import into nucleus      | 7     | 0.63% | 0.267542 |
| GO:0051170~nuclear import                   | 7     | 0.63% | 0.287429 |
| GO:0000060~protein import into nucleus, tra | 3     | 0.27% | 0.402649 |

Median: 0.19868478281630433

Geo: 0.1885086380593916

| Term                                      | Count | %     | PValue   |
|-------------------------------------------|-------|-------|----------|
| GO:0006665~sphingolipid metabolic process | 6     | 0.54% | 0.137856 |
| GO:0006672~ceramide metabolic process     | 4     | 0.36% | 0.198685 |
| GO:0046519~sphingoid metabolic process    | 4     | 0.36% | 0.244569 |

Median: 0.22585340278900806      Geo: 0.18852812202274055

| Term                                        | Count | %     | PValue   |
|---------------------------------------------|-------|-------|----------|
| GO:0015833~peptide transport                | 8     | 0.72% | 0.039498 |
| GO:0046883~regulation of hormone secretior  | 5     | 0.45% | 0.089544 |
| GO:0002790~peptide secretion                | 5     | 0.45% | 0.107637 |
| GO:0046888~negative regulation of hormone   | 3     | 0.27% | 0.189177 |
| GO:0030073~insulin secretion                | 4     | 0.36% | 0.198685 |
| GO:0046879~hormone secretion                | 6     | 0.54% | 0.225853 |
| GO:0050796~regulation of insulin secretion  | 3     | 0.27% | 0.232012 |
| GO:0030072~peptide hormone secretion        | 4     | 0.36% | 0.260231 |
| GO:0003001~generation of a signal involved  | 10    | 0.89% | 0.350879 |
| GO:0051046~regulation of secretion          | 7     | 0.63% | 0.369321 |
| GO:0051048~negative regulation of secretior | 3     | 0.27% | 0.422933 |

Median: 0.20076639204212415      Geo: 0.19510207483180358

| Term                             | Count | %     | PValue   |
|----------------------------------|-------|-------|----------|
| IPR001841:Zinc finger, RING-type | 11    | 0.98% | 0.152621 |
| SM00184:RING                     | 11    | 0.98% | 0.200766 |
| zinc finger region:RING-type     | 5     | 0.45% | 0.242372 |

Median: 0.17259375798038148      Geo: 0.19665995517085125

| Term                                         | Count | %     | PValue   |
|----------------------------------------------|-------|-------|----------|
| GO:0040011~locomotion                        | 9     | 0.81% | 0.096192 |
| GO:0030334~regulation of cell migration      | 7     | 0.63% | 0.1582   |
| GO:0040013~negative regulation of locomoti   | 4     | 0.36% | 0.16939  |
| GO:0040012~regulation of locomotion          | 8     | 0.72% | 0.172594 |
| GO:0051270~regulation of cell motility       | 7     | 0.63% | 0.238419 |
| GO:0030336~negative regulation of cell migr  | 3     | 0.27% | 0.297004 |
| GO:0051271~negative regulation of cell motil | 3     | 0.27% | 0.361117 |

Median: 0.1927075177175326      Geo: 0.19770529455139862

| Term                                          | Count | %     | PValue   |
|-----------------------------------------------|-------|-------|----------|
| GO:0009056~catabolic process                  | 46    | 4.11% | 0.060783 |
| GO:0044248~cellular catabolic process         | 39    | 3.49% | 0.068095 |
| GO:0030163~protein catabolic process          | 16    | 1.43% | 0.12049  |
| GO:0006511~ubiquitin-dependent protein cat    | 12    | 1.07% | 0.134647 |
| GO:0043632~modification-dependent macror      | 12    | 1.07% | 0.144872 |
| GO:0019941~modification-dependent protein     | 12    | 1.07% | 0.144872 |
| GO:0051603~proteolysis involved in cellular p | 12    | 1.07% | 0.166495 |
| GO:0044257~cellular protein catabolic proces  | 12    | 1.07% | 0.183691 |
| GO:0004843~ubiquitin-specific protease activ  | 6     | 0.54% | 0.201724 |
| GO:0019783~small conjugating protein-specii   | 6     | 0.54% | 0.211598 |
| GO:0016790~thiolester hydrolase activity      | 7     | 0.63% | 0.228439 |

|                                             |    |       |          |
|---------------------------------------------|----|-------|----------|
| GO:0004221~ubiquitin thiolesterase activity | 5  | 0.45% | 0.318674 |
| GO:0043285~biopolymer catabolic process     | 16 | 1.43% | 0.421516 |
| GO:0044265~cellular macromolecule cataboli  | 19 | 1.70% | 0.425693 |
| GO:0009057~macromolecule catabolic proce:   | 23 | 2.06% | 0.437564 |
| GO:0008234~cysteine-type peptidase activity | 10 | 0.89% | 0.518148 |

Median: 0.3402131629373112

Geo: 0.20091348973280643

| Term                                      | Count | %     | PValue   |
|-------------------------------------------|-------|-------|----------|
| GO:0009058~biosynthetic process           | 98    | 8.77% | 0.01976  |
| GO:0044249~cellular biosynthetic process  | 67    | 5.99% | 0.249013 |
| GO:0009059~macromolecule biosynthetic prc | 50    | 4.47% | 0.431413 |
| GO:0006412~translation                    | 31    | 2.77% | 0.767586 |

Median: 0.15219034199850132

Geo: 0.20388043471441814

| Term                                         | Count | %     | PValue   |
|----------------------------------------------|-------|-------|----------|
| GO:0009892~negative regulation of metaboli   | 28    | 2.50% | 0.082998 |
| GO:0000122~negative regulation of transcrip  | 12    | 1.07% | 0.106427 |
| GO:0016481~negative regulation of transcrip  | 20    | 1.79% | 0.108749 |
| GO:0045892~negative regulation of transcrip  | 15    | 1.34% | 0.145618 |
| GO:0031324~negative regulation of cellular n | 24    | 2.15% | 0.15219  |
| GO:0045934~negative regulation of nucleoba   | 20    | 1.79% | 0.171513 |
| GO:0016564~transcription repressor activity  | 14    | 1.25% | 0.250078 |
| GO:0006357~regulation of transcription from  | 23    | 2.06% | 0.714292 |
| GO:0006366~transcription from RNA polymer    | 25    | 2.24% | 0.933218 |

Median: 0.20425774245182154

Geo: 0.2051856545880777

| Term                                         | Count | %     | PValue   |
|----------------------------------------------|-------|-------|----------|
| GO:0043549~regulation of kinase activity     | 17    | 1.52% | 0.156675 |
| GO:0051338~regulation of transferase activit | 17    | 1.52% | 0.188353 |
| GO:0045859~regulation of protein kinase acti | 16    | 1.43% | 0.201339 |
| GO:0043086~negative regulation of catalytic  | 8     | 0.72% | 0.204258 |
| GO:0006469~negative regulation of protein k  | 6     | 0.54% | 0.225853 |
| GO:0033673~negative regulation of kinase ac  | 6     | 0.54% | 0.225853 |
| GO:0051348~negative regulation of transfera  | 6     | 0.54% | 0.247342 |

Median: 0.24894442110152143

Geo: 0.21358808151445924

| Term                                 | Count | %     | PValue   |
|--------------------------------------|-------|-------|----------|
| IPR013753:Ras                        | 9     | 0.81% | 0.152954 |
| IPR003578:Ras small GTPase, Rho type | 3     | 0.27% | 0.248944 |
| SM00174:RHO                          | 3     | 0.27% | 0.255899 |

Median: 0.23201158734523689

Geo: 0.21679040728369364

| Term                                       | Count | %     | PValue   |
|--------------------------------------------|-------|-------|----------|
| GO:0006665~sphingolipid metabolic process  | 6     | 0.54% | 0.137856 |
| GO:0006687~glycosphingolipid metabolic pro | 3     | 0.27% | 0.232012 |
| GO:0006664~glycolipid metabolic process    | 3     | 0.27% | 0.318554 |

Median: 0.2103440663828989

Geo: 0.21685062964976048

| Term                                        | Count | %     | PValue   |
|---------------------------------------------|-------|-------|----------|
| GO:0050804~regulation of synaptic transmiss | 6     | 0.54% | 0.204959 |
| GO:0031644~regulation of neurological proce | 7     | 0.63% | 0.210344 |
| GO:0051969~regulation of transmission of ne | 6     | 0.54% | 0.236529 |

Median: 0.23477854425515898

Geo: 0.22626350310823068

| Term                            | Count | %     | PValue   |
|---------------------------------|-------|-------|----------|
| GO:0016477~cell migration       | 21    | 1.88% | 0.210149 |
| GO:0051674~localization of cell | 27    | 2.42% | 0.234779 |
| GO:0006928~cell motility        | 27    | 2.42% | 0.234779 |

Median: 0.213759410366611

Geo: 0.22973313871178894

| Term                                    | Count | %     | PValue   |
|-----------------------------------------|-------|-------|----------|
| GO:0006099~tricarboxylic acid cycle     | 4     | 0.36% | 0.155251 |
| GO:0046356~acetyl-CoA catabolic process | 4     | 0.36% | 0.16939  |
| GO:0006084~acetyl-CoA metabolic process | 5     | 0.45% | 0.193598 |
| GO:0009109~coenzyme catabolic process   | 4     | 0.36% | 0.213759 |
| GO:0009060~aerobic respiration          | 4     | 0.36% | 0.260231 |
| GO:0051187~cofactor catabolic process   | 4     | 0.36% | 0.307828 |
| GO:0045333~cellular respiration         | 4     | 0.36% | 0.387391 |

Median: 0.44053360278966125

Geo: 0.22979315384796073

| Term                                  | Count | %     | PValue   |
|---------------------------------------|-------|-------|----------|
| GO:0060090~molecular adaptor activity | 6     | 0.54% | 0.04997  |
| GO:0005070~SH3/SH2 adaptor activity   | 3     | 0.27% | 0.440534 |
| GO:0030674~protein binding, bridging  | 5     | 0.45% | 0.551213 |

Median: 0.3185542039557815

Geo: 0.2348694799133672

| Term                                         | Count | %     | PValue   |
|----------------------------------------------|-------|-------|----------|
| GO:0045428~regulation of nitric oxide biosyn | 3     | 0.27% | 0.127677 |
| GO:0006809~nitric oxide biosynthetic proces: | 3     | 0.27% | 0.318554 |
| GO:0046209~nitric oxide metabolic process    | 3     | 0.27% | 0.318554 |

Median: 0.2640537134097305

Geo: 0.24588531886167345

| Term                                        | Count | %     | PValue   |
|---------------------------------------------|-------|-------|----------|
| GO:0016868~intramolecular transferase activ | 3     | 0.27% | 0.100971 |
| GO:0016866~intramolecular transferase activ | 4     | 0.36% | 0.182498 |
| GO:0016853~isomerase activity               | 9     | 0.81% | 0.345609 |
| Carbohydrate transport and metabolism       | 7     | 0.63% | 0.573973 |

Median: 0.21316646918908094

Geo: 0.24597617148673978

| Term                                         | Count | %     | PValue   |
|----------------------------------------------|-------|-------|----------|
| GO:0004468~lysine N-acetyltransferase activ  | 3     | 0.27% | 0.137908 |
| GO:0004402~histone acetyltransferase activi  | 3     | 0.27% | 0.137908 |
| GO:0016746~transferase activity, transferrin | 12    | 1.07% | 0.162026 |
| GO:0008415~acyltransferase activity          | 11    | 0.98% | 0.206846 |
| GO:0016747~transferase activity, transferrin | 11    | 0.98% | 0.213166 |
| GO:0016410~N-acyltransferase activity        | 5     | 0.45% | 0.244245 |



|                                         |   |       |          |
|-----------------------------------------|---|-------|----------|
| GO:0008080~N-acetyltransferase activity | 4 | 0.36% | 0.362031 |
| acyltransferase                         | 6 | 0.54% | 0.457428 |
| GO:0016407~acetyltransferase activity   | 4 | 0.36% | 0.599807 |

|                                             |                          |       |          |
|---------------------------------------------|--------------------------|-------|----------|
| Median: 0.3846404082940681                  | Geo: 0.24846768359367194 |       |          |
| Term                                        | Count                    | %     | PValue   |
| GO:0006643~membrane lipid metabolic process | 14                       | 1.25% | 0.099218 |
| GO:0044255~cellular lipid metabolic process | 33                       | 2.95% | 0.38464  |
| GO:0006629~lipid metabolic process          | 39                       | 3.49% | 0.401942 |

|                                                    |                          |       |          |
|----------------------------------------------------|--------------------------|-------|----------|
| Median: 0.34773517538872534                        | Geo: 0.24956754803083364 |       |          |
| Term                                               | Count                    | %     | PValue   |
| rno04662:B cell receptor signaling pathway         | 9                        | 0.81% | 0.050096 |
| rno04360:Axon guidance                             | 11                       | 0.98% | 0.220624 |
| rno04650:Natural killer cell mediated cytotoxicity | 9                        | 0.81% | 0.288715 |
| rno04210:Apoptosis                                 | 7                        | 0.63% | 0.406755 |
| rno04660:T cell receptor signaling pathway         | 8                        | 0.72% | 0.42779  |
| rno04370:VEGF signaling pathway                    | 6                        | 0.54% | 0.435149 |

|                                                                     |                          |       |          |
|---------------------------------------------------------------------|--------------------------|-------|----------|
| Median: 0.32482771592771276                                         | Geo: 0.24979656724149604 |       |          |
| Term                                                                | Count                    | %     | PValue   |
| GO:0035258~steroid hormone receptor binding                         | 5                        | 0.45% | 0.025487 |
| GO:0003713~transcription coactivator activity                       | 14                       | 1.25% | 0.060449 |
| GO:0048518~positive regulation of biological process                | 70                       | 6.26% | 0.121497 |
| GO:0008134~transcription factor binding                             | 14                       | 1.25% | 0.123257 |
| GO:0008134~transcription factor binding                             | 26                       | 2.33% | 0.124756 |
| GO:0003712~transcription cofactor activity                          | 19                       | 1.70% | 0.14302  |
| GO:0009893~positive regulation of metabolic process                 | 28                       | 2.50% | 0.201809 |
| GO:0016563~transcription activator activity                         | 19                       | 1.70% | 0.273589 |
| GO:0031325~positive regulation of cellular metabolic process        | 24                       | 2.15% | 0.376066 |
| GO:0048522~positive regulation of cellular process                  | 58                       | 5.19% | 0.380492 |
| GO:0045935~positive regulation of nucleobase metabolic process      | 19                       | 1.70% | 0.487533 |
| GO:0045893~positive regulation of transcript metabolic process      | 15                       | 1.34% | 0.509516 |
| GO:0045941~positive regulation of transcript metabolic process      | 17                       | 1.52% | 0.607714 |
| GO:0045944~positive regulation of transcript metabolic process      | 10                       | 0.89% | 0.702208 |
| GO:0006357~regulation of transcription from RNA polymerase promoter | 23                       | 2.06% | 0.714292 |
| GO:0006366~transcription from RNA polymerase promoter               | 25                       | 2.24% | 0.933218 |

|                                                   |                         |       |          |
|---------------------------------------------------|-------------------------|-------|----------|
| Median: 0.261572969683048                         | Geo: 0.2505067926553862 |       |          |
| Term                                              | Count                   | %     | PValue   |
| GO:0005778~peroxisomal membrane                   | 4                       | 0.36% | 0.187301 |
| GO:0031903~microbody membrane                     | 4                       | 0.36% | 0.187301 |
| GO:0044439~peroxisomal part                       | 4                       | 0.36% | 0.261573 |
| GO:0044438~microbody part                         | 4                       | 0.36% | 0.261573 |
| GO:0005777~peroxisome                             | 7                       | 0.63% | 0.28454  |
| GO:0042579~microbody                              | 7                       | 0.63% | 0.28454  |
| GO:0007031~peroxisome organization and biogenesis | 3                       | 0.27% | 0.318554 |

|                                      |                          |       |          |
|--------------------------------------|--------------------------|-------|----------|
| Median: 0.18151085579993848          | Geo: 0.25534676871162876 |       |          |
| Term                                 | Count                    | %     | PValue   |
| GO:0015630~microtubule cytoskeleton  | 22                       | 1.97% | 0.125925 |
| GO:0007017~microtubule-based process | 16                       | 1.43% | 0.181511 |
| GO:0005874~microtubule               | 8                        | 0.72% | 0.728409 |

|                                                  |                          |       |          |
|--------------------------------------------------|--------------------------|-------|----------|
| Median: 0.36267773691844213                      | Geo: 0.25565972459880804 |       |          |
| Term                                             | Count                    | %     | PValue   |
| GO:0006643~membrane lipid metabolic process      | 14                       | 1.25% | 0.099218 |
| GO:0006644~phospholipid metabolic process        | 9                        | 0.81% | 0.362678 |
| GO:0006650~glycerophospholipid metabolic process | 5                        | 0.45% | 0.464381 |

|                                                                                                   |                         |       |          |
|---------------------------------------------------------------------------------------------------|-------------------------|-------|----------|
| Median: 0.25291158153882726                                                                       | Geo: 0.2570069622144935 |       |          |
| Term                                                                                              | Count                   | %     | PValue   |
| GO:0001565~phorbol ester receptor activity                                                        | 3                       | 0.27% | 0.137908 |
| IPR002219:Protein kinase C, phorbol ester/diazolobenzyl zinc finger region:Phorbol-ester/DAG-type | 5                       | 0.45% | 0.237707 |
| Phorbol-ester binding                                                                             | 3                       | 0.27% | 0.246277 |
| SM00109:C1                                                                                        | 4                       | 0.36% | 0.259546 |
| GO:0019992~diacylglycerol binding                                                                 | 5                       | 0.45% | 0.277455 |
|                                                                                                   | 3                       | 0.27% | 0.495685 |

|                                         |                        |       |          |
|-----------------------------------------|------------------------|-------|----------|
| Median: 0.2646648643314025              | Geo: 0.257178985179388 |       |          |
| Term                                    | Count                  | %     | PValue   |
| GO:0031981~nuclear lumen                | 31                     | 2.77% | 0.137206 |
| GO:0043233~organelle lumen              | 38                     | 3.40% | 0.201213 |
| GO:0031974~membrane-enclosed lumen      | 38                     | 3.40% | 0.201213 |
| GO:0044428~nuclear part                 | 45                     | 4.03% | 0.264665 |
| GO:0005667~transcription factor complex | 13                     | 1.16% | 0.312198 |
| GO:0005654~nucleoplasm                  | 22                     | 1.97% | 0.320442 |
| GO:0044451~nucleoplasm part             | 17                     | 1.52% | 0.505927 |

|                                                    |                         |       |          |
|----------------------------------------------------|-------------------------|-------|----------|
| Median: 0.23201158734523689                        | Geo: 0.2583443959260503 |       |          |
| Term                                               | Count                   | %     | PValue   |
| GO:0006903~vesicle targeting                       | 3                       | 0.27% | 0.147649 |
| GO:0051650~establishment of vesicle localization   | 3                       | 0.27% | 0.210485 |
| GO:0051648~vesicle localization                    | 3                       | 0.27% | 0.232012 |
| GO:0051640~organelle localization                  | 4                       | 0.36% | 0.307828 |
| GO:0051656~establishment of organelle localization | 3                       | 0.27% | 0.518472 |

|                                       |                          |       |          |
|---------------------------------------|--------------------------|-------|----------|
| Median: 0.25368116831589566           | Geo: 0.25999331869230846 |       |          |
| Term                                  | Count                    | %     | PValue   |
| GO:0042745~circadian sleep/wake cycle | 3                        | 0.27% | 0.189177 |
| GO:0048512~circadian behavior         | 3                        | 0.27% | 0.210485 |
| GO:0030431~sleep                      | 3                        | 0.27% | 0.232012 |
| GO:0007622~rhythmic behavior          | 3                        | 0.27% | 0.275351 |
| GO:0048511~rhythmic process           | 9                        | 0.81% | 0.276768 |
| GO:0007623~circadian rhythm           | 5                        | 0.45% | 0.438703 |

Median: 0.43323106073215817

Geo: 0.26210156016547564

| Term                                        | Count | %     | PValue   |
|---------------------------------------------|-------|-------|----------|
| GO:0030031~cell projection biogenesis       | 8     | 0.72% | 0.018509 |
| GO:0048699~generation of neurons            | 27    | 2.42% | 0.093349 |
| GO:0022008~neurogenesis                     | 29    | 2.59% | 0.105274 |
| GO:0048858~cell projection morphogenesis    | 20    | 1.79% | 0.129073 |
| GO:0030030~cell projection organization and | 20    | 1.79% | 0.129073 |
| GO:0032990~cell part morphogenesis          | 20    | 1.79% | 0.129073 |
| GO:0030182~neuron differentiation           | 20    | 1.79% | 0.370018 |
| GO:0048666~neuron development               | 15    | 1.34% | 0.405516 |
| GO:0031175~neurite development              | 13    | 1.16% | 0.460946 |
| GO:0000902~cell morphogenesis               | 28    | 2.50% | 0.512472 |
| GO:0032989~cellular structure morphogenesis | 28    | 2.50% | 0.512472 |
| GO:0000904~cellular morphogenesis during c  | 12    | 1.07% | 0.520972 |
| GO:0048812~neurite morphogenesis            | 11    | 0.98% | 0.525559 |
| GO:0048667~neuron morphogenesis during c    | 11    | 0.98% | 0.525559 |
| GO:0009653~anatomical structure morphoge    | 59    | 5.28% | 0.618174 |
| GO:0007409~axonogenesis                     | 8     | 0.72% | 0.784897 |

Median: 0.2920008222498741

Geo: 0.27413750077368854

| Term                                        | Count | %     | PValue   |
|---------------------------------------------|-------|-------|----------|
| GO:0033014~tetrapyrrole biosynthetic proces | 3     | 0.27% | 0.168192 |
| GO:0006779~porphyrin biosynthetic process   | 3     | 0.27% | 0.168192 |
| GO:0051188~cofactor biosynthetic process    | 9     | 0.81% | 0.244059 |
| GO:0033013~tetrapyrrole metabolic process   | 3     | 0.27% | 0.339943 |
| GO:0006778~porphyrin metabolic process      | 3     | 0.27% | 0.339943 |
| GO:0046483~heterocycle metabolic process    | 7     | 0.63% | 0.531976 |

Median: 0.2589829024123425

Geo: 0.2748545576081132

| Term                                        | Count | %     | PValue   |
|---------------------------------------------|-------|-------|----------|
| GO:0009310~amine catabolic process          | 7     | 0.63% | 0.174917 |
| GO:0044270~nitrogen compound catabolic pr   | 7     | 0.63% | 0.192318 |
| binding site:Pyridoxal phosphate (covalent) | 4     | 0.36% | 0.258983 |
| GO:0009063~amino acid catabolic process     | 5     | 0.45% | 0.38641  |
| rno00252:Alanine and aspartate metabolism   | 3     | 0.27% | 0.465956 |

Median: 0.315135754469714

Geo: 0.27852397661412764

| Term                     | Count | %     | PValue   |
|--------------------------|-------|-------|----------|
| GO:0005773~vacuole       | 13    | 1.16% | 0.212609 |
| GO:0005764~lysosome      | 11    | 0.98% | 0.315136 |
| GO:0000323~lytic vacuole | 11    | 0.98% | 0.322484 |

Median: 0.3837679797429484

Geo: 0.28680725809930663

| Term                                     | Count | %     | PValue   |
|------------------------------------------|-------|-------|----------|
| GO:0001701~in utero embryonic developmer | 8     | 0.72% | 0.09846  |
| GO:0009790~embryonic development         | 21    | 1.88% | 0.308097 |
| GO:0043009~chordate embryonic developme  | 9     | 0.81% | 0.459439 |

GO:0009792~embryonic development ending 9 0.81% 0.485498

Median: 0.43870341527122014

Geo: 0.29161371042556156

| Term                                         | Count | %     | PValue   |
|----------------------------------------------|-------|-------|----------|
| GO:0051241~negative regulation of multicelli | 9     | 0.81% | 7.98E-04 |
| GO:0008016~regulation of heart contraction   | 5     | 0.45% | 0.281088 |
| GO:0003015~heart process                     | 5     | 0.45% | 0.373214 |
| GO:0060047~heart contraction                 | 5     | 0.45% | 0.373214 |
| GO:0035150~regulation of tube size           | 5     | 0.45% | 0.412681 |
| GO:0050880~regulation of blood vessel size   | 5     | 0.45% | 0.412681 |
| GO:0003018~vascular process in circulatory s | 5     | 0.45% | 0.438703 |
| GO:0008217~regulation of blood pressure      | 6     | 0.54% | 0.452147 |
| GO:0042311~vasodilation                      | 3     | 0.27% | 0.553633 |
| GO:0035295~tube development                  | 11    | 0.98% | 0.584276 |
| GO:0035239~tube morphogenesis                | 8     | 0.72% | 0.611771 |
| GO:0008015~blood circulation                 | 10    | 0.89% | 0.726533 |
| GO:0003013~circulatory system process        | 10    | 0.89% | 0.726533 |

Median: 0.2779018162955732

Geo: 0.29279001064309174

| Term                                        | Count | %     | PValue   |
|---------------------------------------------|-------|-------|----------|
| GO:0043284~biopolymer biosynthetic proces   | 7     | 0.63% | 0.134529 |
| GO:0033692~cellular polysaccharide biosyntf | 4     | 0.36% | 0.213759 |
| GO:0000271~polysaccharide biosynthetic pro  | 4     | 0.36% | 0.229067 |
| GO:0009250~glucan biosynthetic process      | 3     | 0.27% | 0.232012 |
| GO:0005978~glycogen biosynthetic process    | 3     | 0.27% | 0.232012 |
| GO:0005977~glycogen metabolic process       | 4     | 0.36% | 0.323792 |
| GO:0006073~glucan metabolic process         | 4     | 0.36% | 0.339757 |
| GO:0044264~cellular polysaccharide metabol  | 5     | 0.45% | 0.412681 |
| GO:0005976~polysaccharide metabolic proce   | 5     | 0.45% | 0.42573  |
| GO:0016051~carbohydrate biosynthetic proce  | 6     | 0.54% | 0.675549 |

Median: 0.2934854081935494

Geo: 0.2955976854979881

| Term                                       | Count | %     | PValue   |
|--------------------------------------------|-------|-------|----------|
| GO:0051093~negative regulation of developn | 9     | 0.81% | 0.136133 |
| GO:0050771~negative regulation of axonoge  | 3     | 0.27% | 0.147649 |
| GO:0050767~regulation of neurogenesis      | 6     | 0.54% | 0.225853 |
| GO:0050768~negative regulation of neuroger | 3     | 0.27% | 0.361117 |
| GO:0050770~regulation of axonogenesis      | 3     | 0.27% | 0.518472 |
| GO:0007409~axonogenesis                    | 8     | 0.72% | 0.784897 |

Median: 0.3419389271765082

Geo: 0.3125283750727572

| Term                                         | Count | %     | PValue   |
|----------------------------------------------|-------|-------|----------|
| isomerase                                    | 7     | 0.63% | 0.237841 |
| Rotamase                                     | 3     | 0.27% | 0.29287  |
| GO:0003755~peptidyl-prolyl cis-trans isomera | 3     | 0.27% | 0.341939 |
| GO:0016853~isomerase activity                | 9     | 0.81% | 0.345609 |
| GO:0016859~cis-trans isomerase activity      | 3     | 0.27% | 0.362203 |

Median: 0.3185542039557815

Geo: 0.3141499002215701

| Term                                       | Count | %     | PValue   |
|--------------------------------------------|-------|-------|----------|
| GO:0007043~intercellular junction assembly | 3     | 0.27% | 0.210485 |
| GO:0045216~intercellular junction assembly | 3     | 0.27% | 0.318554 |
| GO:0007028~cytoplasm organization and bio  | 3     | 0.27% | 0.462387 |

Median: 0.4768385859093126

Geo: 0.31852749595736973

| Term                                        | Count | %     | PValue   |
|---------------------------------------------|-------|-------|----------|
| GO:0006767~water-soluble vitamin metabolic  | 9     | 0.81% | 0.007896 |
| GO:0006769~nicotinamide metabolic process   | 5     | 0.45% | 0.089544 |
| GO:0006766~vitamin metabolic process        | 9     | 0.81% | 0.106836 |
| GO:0019362~pyridine nucleotide metabolic p  | 5     | 0.45% | 0.107637 |
| GO:0044262~cellular carbohydrate metabolic  | 26    | 2.33% | 0.11154  |
| GO:0006098~pentose-phosphate shunt          | 3     | 0.27% | 0.168192 |
| GO:0006066~alcohol metabolic process        | 23    | 2.06% | 0.243199 |
| GO:0006739~NADP metabolic process           | 3     | 0.27% | 0.253662 |
| rno00010:Glycolysis / Gluconeogenesis       | 5     | 0.45% | 0.360616 |
| GO:0005975~carbohydrate metabolic process   | 30    | 2.68% | 0.364572 |
| glycolysis                                  | 4     | 0.36% | 0.400613 |
| GO:0016616~oxidoreductase activity, acting  | 7     | 0.63% | 0.471222 |
| GO:0006007~glucose catabolic process        | 7     | 0.63% | 0.482455 |
| GO:0006006~glucose metabolic process        | 10    | 0.89% | 0.514797 |
| GO:0046365~monosaccharide catabolic process | 7     | 0.63% | 0.531976 |
| GO:0019320~hexose catabolic process         | 7     | 0.63% | 0.531976 |
| GO:0046164~alcohol catabolic process        | 7     | 0.63% | 0.56072  |
| GO:0019318~hexose metabolic process         | 11    | 0.98% | 0.659195 |
| GO:0005996~monosaccharide metabolic process | 11    | 0.98% | 0.67824  |
| binding site:Substrate                      | 6     | 0.54% | 0.716583 |
| GO:0050662~coenzyme binding                 | 9     | 0.81% | 0.750593 |
| GO:0044275~cellular carbohydrate catabolic  | 7     | 0.63% | 0.767266 |
| GO:0016052~carbohydrate catabolic process   | 7     | 0.63% | 0.813781 |
| GO:0006096~glycolysis                       | 4     | 0.36% | 0.861085 |

Median: 0.32733578102708194

Geo: 0.32861072017313064

| Term                                     | Count | %     | PValue   |
|------------------------------------------|-------|-------|----------|
| GO:0006821~chloride transport            | 6     | 0.54% | 0.16533  |
| GO:0031404~chloride ion binding          | 5     | 0.45% | 0.185787 |
| GO:0043168~anion binding                 | 5     | 0.45% | 0.197106 |
| GO:0008509~anion transmembrane transport | 10    | 0.89% | 0.276798 |
| GO:0015698~inorganic anion transport     | 11    | 0.98% | 0.294678 |
| GO:0006820~anion transport               | 13    | 1.16% | 0.327336 |
| GO:0005253~anion channel activity        | 5     | 0.45% | 0.331305 |
| chloride channel                         | 4     | 0.36% | 0.400613 |
| GO:0005254~chloride channel activity     | 4     | 0.36% | 0.480429 |
| chloride                                 | 4     | 0.36% | 0.501672 |
| GO:0022836~gated channel activity        | 11    | 0.98% | 0.933086 |

Median: 0.38303656691347576

Geo: 0.3286281289729965

| Term                                       | Count | %     | PValue   |
|--------------------------------------------|-------|-------|----------|
| GO:0019198~transmembrane receptor protei   | 3     | 0.27% | 0.177206 |
| GO:0004725~protein tyrosine phosphatase ac | 6     | 0.54% | 0.383037 |
| SM00194:PTPc                               | 4     | 0.36% | 0.522872 |

Median: 0.3137784044701102

Geo: 0.35567081697826736

| Term                                         | Count | %     | PValue   |
|----------------------------------------------|-------|-------|----------|
| GO:0016575~histone deacetylation             | 3     | 0.27% | 0.210485 |
| GO:0004407~histone deacetylase activity      | 3     | 0.27% | 0.259361 |
| GO:0033558~protein deacetylase activity      | 3     | 0.27% | 0.259361 |
| GO:0006476~protein amino acid deacetylatio   | 3     | 0.27% | 0.275351 |
| GO:0016811~hydrolase activity, acting on cai | 5     | 0.45% | 0.306082 |
| GO:0019213~deacetylase activity              | 3     | 0.27% | 0.321475 |
| GO:0016570~histone modification              | 4     | 0.36% | 0.464591 |
| GO:0016569~covalent chromatin modificator    | 4     | 0.36% | 0.479537 |
| GO:0016568~chromatin modification            | 7     | 0.63% | 0.570116 |
| GO:0016810~hydrolase activity, acting on cai | 6     | 0.54% | 0.664852 |

Median: 0.37687762029993876

Geo: 0.35655060468790495

| Term                                        | Count | %     | PValue   |
|---------------------------------------------|-------|-------|----------|
| GO:0031300~intrinsic to organelle membrane  | 9     | 0.81% | 0.177475 |
| GO:0031301~integral to organelle membrane   | 8     | 0.72% | 0.216569 |
| GO:0030173~integral to Golgi membrane       | 4     | 0.36% | 0.323272 |
| GO:0031228~intrinsic to Golgi membrane      | 4     | 0.36% | 0.430483 |
| GO:0030176~integral to endoplasmic reticulu | 3     | 0.27% | 0.570731 |
| GO:0031227~intrinsic to endoplasmic reticul | 3     | 0.27% | 0.673033 |

Median: 0.4075141240870743

Geo: 0.35866557898917073

| Term                                          | Count | %     | PValue   |
|-----------------------------------------------|-------|-------|----------|
| IPR000162:GPCR, family 3, metabotropic glut:  | 3     | 0.27% | 0.08858  |
| IPR001828:Extracellular ligand-binding recept | 5     | 0.45% | 0.310163 |
| IPR000337:GPCR, family 3                      | 4     | 0.36% | 0.354689 |
| IPR011500:GPCR, family 3, nine cysteines reg  | 3     | 0.27% | 0.46034  |
| GO:0008066~glutamate receptor activity        | 7     | 0.63% | 0.608926 |
| GO:0008067~metabotropic glutamate, GABA-      | 5     | 0.45% | 0.779334 |

Median: 0.3606164229489288

Geo: 0.36505968111636955

| Term                                     | Count | %     | PValue   |
|------------------------------------------|-------|-------|----------|
| rno05210:Colorectal cancer               | 9     | 0.81% | 0.144588 |
| rno05215:Prostate cancer                 | 9     | 0.81% | 0.20278  |
| rno05212:Pancreatic cancer               | 8     | 0.72% | 0.209256 |
| rno05219:Bladder cancer                  | 5     | 0.45% | 0.22194  |
| rno05213:Endometrial cancer              | 6     | 0.54% | 0.258366 |
| rno04664:Fc epsilon RI signaling pathway | 7     | 0.63% | 0.308233 |
| rno05214:Glioma                          | 6     | 0.54% | 0.35282  |
| rno04930:Type II diabetes mellitus       | 5     | 0.45% | 0.360616 |
| rno04910:Insulin signaling pathway       | 10    | 0.89% | 0.420725 |
| rno04012:ErbB signaling pathway          | 7     | 0.63% | 0.480269 |

|                                               |   |       |          |
|-----------------------------------------------|---|-------|----------|
| rno05221:Acute myeloid leukemia               | 5 | 0.45% | 0.499266 |
| rno05220:Chronic myeloid leukemia             | 6 | 0.54% | 0.601857 |
| rno05223:Non-small cell lung cancer           | 4 | 0.36% | 0.679289 |
| rno04620:Toll-like receptor signaling pathway | 6 | 0.54% | 0.689423 |
| rno05218:Melanoma                             | 5 | 0.45% | 0.694744 |

Median: 0.6107688362713029

Geo: 0.36786362508084713

| Term                                          | Count | %     | PValue   |
|-----------------------------------------------|-------|-------|----------|
| GO:0043412~biopolymer modification            | 104   | 9.30% | 0.010652 |
| GO:0006464~protein modification process       | 101   | 9.03% | 0.011152 |
| GO:0043687~post-translational protein modif   | 81    | 7.25% | 0.052405 |
| serine/threonine-specific protein kinase      | 6     | 0.54% | 0.054413 |
| GO:0006796~phosphate metabolic process        | 58    | 5.19% | 0.203992 |
| GO:0006793~phosphorus metabolic process       | 58    | 5.19% | 0.203992 |
| phosphotransferase                            | 9     | 0.81% | 0.270275 |
| IPR008271:Serine/threonine protein kinase, ac | 14    | 1.25% | 0.389865 |
| atp-binding                                   | 39    | 3.49% | 0.418874 |
| ATP                                           | 11    | 0.98% | 0.436506 |
| binding site:ATP                              | 15    | 1.34% | 0.467178 |
| GO:0016740~transferase activity               | 91    | 8.14% | 0.503766 |
| Serine/threonine-protein kinase               | 13    | 1.16% | 0.523432 |
| domain:Protein kinase                         | 13    | 1.16% | 0.606836 |
| IPR000719:Protein kinase, core                | 18    | 1.61% | 0.614701 |
| IPR002290:Serine/threonine protein kinase     | 9     | 0.81% | 0.665432 |
| GO:0016310~phosphorylation                    | 41    | 3.67% | 0.697755 |
| GO:0004713~protein-tyrosine kinase activity   | 15    | 1.34% | 0.727277 |
| GO:0004674~protein serine/threonine kinase    | 26    | 2.33% | 0.739647 |
| GO:0006468~protein amino acid phosphoryla     | 34    | 3.04% | 0.74446  |
| GO:0016301~kinase activity                    | 43    | 3.85% | 0.775186 |
| GO:0016772~transferase activity, transferrin  | 50    | 4.47% | 0.806929 |
| active site:Proton acceptor                   | 16    | 1.43% | 0.829169 |
| kinase                                        | 22    | 1.97% | 0.878988 |
| GO:0016773~phosphotransferase activity, alc   | 35    | 3.13% | 0.882313 |
| SM00220:S_TKc                                 | 16    | 1.43% | 0.886968 |
| nucleotide phosphate-binding region:ATP       | 15    | 1.34% | 0.911234 |
| GO:0004672~protein kinase activity            | 29    | 2.59% | 0.915438 |

Median: 0.36474197152379556

Geo: 0.3745507585387694

| Term                                          | Count | %     | PValue   |
|-----------------------------------------------|-------|-------|----------|
| domain:Helix-loop-helix motif                 | 6     | 0.54% | 0.103468 |
| SM00353:HLH                                   | 7     | 0.63% | 0.226373 |
| DNA-binding region:Basic motif                | 6     | 0.54% | 0.346947 |
| IPR001092:Basic helix-loop-helix dimerisation | 6     | 0.54% | 0.364742 |
| GO:0003705~RNA polymerase II transcription    | 3     | 0.27% | 0.440534 |
| IPR011598:Helix-loop-helix DNA-binding        | 3     | 0.27% | 0.803061 |
| GO:0003702~RNA polymerase II transcription    | 5     | 0.45% | 0.986203 |

Median: 0.40335407232030307

Geo: 0.3871980889214496

| Term                                       | Count | %     | PValue   |
|--------------------------------------------|-------|-------|----------|
| GO:0009719~response to endogenous stimuli  | 28    | 2.50% | 0.170654 |
| GO:0006974~response to DNA damage stimulus | 15    | 1.34% | 0.366557 |
| GO:0006281~DNA repair                      | 12    | 1.07% | 0.403354 |
| GO:0006260~DNA replication                 | 11    | 0.98% | 0.533056 |
| GO:0006259~DNA metabolic process           | 32    | 2.86% | 0.647067 |

Median: 0.3945131660035479

Geo: 0.39080685877127763

| Term                              | Count | %     | PValue   |
|-----------------------------------|-------|-------|----------|
| IPR013766:Thioredoxin domain      | 3     | 0.27% | 0.297638 |
| GO:0045454~cell redox homeostasis | 5     | 0.45% | 0.373214 |
| IPR006662:Thioredoxin-related     | 3     | 0.27% | 0.415812 |
| IPR012335:Thioredoxin fold        | 6     | 0.54% | 0.505016 |

Median: 0.577788008160159

Geo: 0.40749427993885956

| Term                                             | Count | %     | PValue   |
|--------------------------------------------------|-------|-------|----------|
| IPR001881:EGF-like calcium-binding               | 9     | 0.81% | 0.027665 |
| SM00179:EGF_CA                                   | 9     | 0.81% | 0.039536 |
| domain:EGF-like 1                                | 6     | 0.54% | 0.132888 |
| IPR000152:Aspartic acid and asparagine hydrolase | 7     | 0.63% | 0.164861 |
| IPR006209:EGF-like                               | 8     | 0.72% | 0.193811 |
| egf-like domain                                  | 11    | 0.98% | 0.205223 |
| IPR000742:EGF-like, type 3                       | 10    | 0.89% | 0.212821 |
| domain:EGF-like 3; calcium-binding               | 3     | 0.27% | 0.220383 |
| IPR013091:EGF calcium-binding                    | 5     | 0.45% | 0.251909 |
| IPR006210:EGF                                    | 10    | 0.89% | 0.254032 |
| SM00181:EGF                                      | 10    | 0.89% | 0.280013 |
| domain:EGF-like 2                                | 4     | 0.36% | 0.316111 |
| domain:EGF-like 2; calcium-binding               | 3     | 0.27% | 0.423992 |
| IPR013032:EGF-like region                        | 11    | 0.98% | 0.511755 |
| rno04610:Complement and coagulation cascade      | 5     | 0.45% | 0.528473 |
| serine proteinase                                | 3     | 0.27% | 0.627103 |
| GO:0007596~blood coagulation                     | 5     | 0.45% | 0.688275 |
| GO:0050817~coagulation                           | 5     | 0.45% | 0.697531 |
| GO:0007599~hemostasis                            | 5     | 0.45% | 0.724107 |
| active site:Charge relay system                  | 5     | 0.45% | 0.853922 |
| serine protease                                  | 5     | 0.45% | 0.860029 |
| domain:Peptidase S1                              | 3     | 0.27% | 0.864596 |
| IPR001314:Peptidase S1A, chymotrypsin            | 5     | 0.45% | 0.871184 |
| GO:0050878~regulation of body fluid levels       | 5     | 0.45% | 0.897558 |
| IPR001254:Peptidase S1 and S6, chymotrypsin      | 5     | 0.45% | 0.903363 |
| GO:0008236~serine-type peptidase activity        | 9     | 0.81% | 0.911622 |
| GO:0017171~serine hydrolase activity             | 9     | 0.81% | 0.911622 |
| SM00020:Tryp_SPC                                 | 5     | 0.45% | 0.912062 |
| GO:0004252~serine-type endopeptidase activity    | 7     | 0.63% | 0.957408 |
| protease                                         | 12    | 1.07% | 0.976645 |

Median: 0.40647718696843593

Geo: 0.41412682105793264



| Term                                      | Count | %     | PValue   |
|-------------------------------------------|-------|-------|----------|
| GO:0006323~DNA packaging                  | 16    | 1.43% | 0.206447 |
| IPR002164:Nucleosome assembly protein (NA | 3     | 0.27% | 0.273309 |
| GO:0006334~nucleosome assembly            | 6     | 0.54% | 0.31441  |
| GO:0006325~establishment and/or maintaina | 14    | 1.25% | 0.371224 |
| GO:0031497~chromatin assembly             | 6     | 0.54% | 0.406477 |
| GO:0000786~nucleosome                     | 4     | 0.36% | 0.489057 |
| GO:0065004~protein-DNA complex assembly   | 7     | 0.63% | 0.570116 |
| GO:0051276~chromosome organization and t  | 15    | 1.34% | 0.64874  |
| GO:0006333~chromatin assembly or disasser | 6     | 0.54% | 0.739903 |

Median: 0.532431042883997

Geo: 0.4177511484099943

| Term                                         | Count | %     | PValue   |
|----------------------------------------------|-------|-------|----------|
| GO:0046851~negative regulation of bone ren   | 4     | 0.36% | 0.059801 |
| GO:0030279~negative regulation of ossificati | 3     | 0.27% | 0.127677 |
| GO:0046850~regulation of bone remodeling     | 5     | 0.45% | 0.242656 |
| GO:0030278~regulation of ossification        | 4     | 0.36% | 0.323792 |
| GO:0048771~tissue remodeling                 | 11    | 0.98% | 0.51045  |
| GO:0030282~bone mineralization               | 3     | 0.27% | 0.518472 |
| GO:0046849~bone remodeling                   | 10    | 0.89% | 0.54639  |
| GO:0001503~ossification                      | 8     | 0.72% | 0.65935  |
| GO:0031214~biomineral formation              | 8     | 0.72% | 0.65935  |
| GO:0001649~osteoblast differentiation        | 3     | 0.27% | 0.84536  |
| GO:0001501~skeletal development              | 11    | 0.98% | 0.892239 |
| GO:0009888~tissue development                | 12    | 1.07% | 0.993113 |

Median: 0.4126814261238582

Geo: 0.42114604607328787

| Term                                         | Count | %     | PValue   |
|----------------------------------------------|-------|-------|----------|
| GO:0000245~spliceosome assembly              | 3     | 0.27% | 0.402649 |
| GO:0000377~RNA splicing, via transesterifica | 5     | 0.45% | 0.412681 |
| GO:0000398~nuclear mRNA splicing, via splic  | 5     | 0.45% | 0.412681 |
| GO:0000375~RNA splicing, via transesterifica | 5     | 0.45% | 0.412681 |
| GO:0008380~RNA splicing                      | 9     | 0.81% | 0.468157 |

Median: 0.46654621200982815

Geo: 0.42269776100474143

| Term                                        | Count | %     | PValue   |
|---------------------------------------------|-------|-------|----------|
| GO:0046058~cAMP metabolic process           | 4     | 0.36% | 0.229067 |
| GO:0006171~cAMP biosynthetic process        | 3     | 0.27% | 0.382033 |
| GO:0009187~cyclic nucleotide metabolic proc | 4     | 0.36% | 0.55106  |
| GO:0009190~cyclic nucleotide biosynthetic p | 3     | 0.27% | 0.662001 |

Median: 0.9529865236334002

Geo: 0.42284236028087474

| Term                                       | Count | %     | PValue   |
|--------------------------------------------|-------|-------|----------|
| GO:0007187~G-protein signaling, coupled to | 14    | 1.25% | 0.031366 |
| GO:0019932~second-messenger-mediated sig   | 24    | 2.15% | 0.049374 |
| GO:0019935~cyclic-nucleotide-mediated sign | 14    | 1.25% | 0.065869 |
| GO:0007188~G-protein signaling, coupled to | 11    | 0.98% | 0.066354 |
| G protein-coupled receptor                 | 11    | 0.98% | 0.068436 |

|                                              |    |       |          |
|----------------------------------------------|----|-------|----------|
| GO:0019933~cAMP-mediated signaling           | 11 | 0.98% | 0.127194 |
| GO:0008227~amine receptor activity           | 4  | 0.36% | 0.46613  |
| rno04080:Neuroactive ligand-receptor interac | 17 | 1.52% | 0.673005 |
| PIRSF002406:vertebrate rhodopsin             | 4  | 0.36% | 0.841308 |
| transducer                                   | 20 | 1.79% | 0.952739 |
| g-protein coupled receptor                   | 18 | 1.61% | 0.952987 |
| IPR000276:Rhodopsin-like GPCR superfamily    | 12 | 1.07% | 0.999899 |
| receptor                                     | 36 | 3.22% | 0.999976 |
| GO:0007166~cell surface receptor linked sigr | 76 | 6.80% | 1        |
| GO:0060089~molecular transducer activity     | 86 | 7.69% | 1        |
| GO:0004871~signal transducer activity        | 86 | 7.69% | 1        |
| GO:0007186~G-protein coupled receptor prot   | 44 | 3.94% | 1        |
| GO:0004872~receptor activity                 | 60 | 5.37% | 1        |
| GO:0004888~transmembrane receptor activit    | 38 | 3.40% | 1        |
| GO:0004930~G-protein coupled receptor acti   | 27 | 2.42% | 1        |
| GO:0001584~rhodopsin-like receptor activity  | 16 | 1.43% | 1        |

Median: 0.7093029113193254

Geo: 0.4274336816670745

| Term                                 | Count | %     | PValue   |
|--------------------------------------|-------|-------|----------|
| IPR013753:Ras                        | 9     | 0.81% | 0.152954 |
| IPR003579:Ras small GTPase, Rab type | 3     | 0.27% | 0.709303 |
| SM00175:RAB                          | 3     | 0.27% | 0.719805 |

Median: 0.3316371203131925

Geo: 0.43087329622529147

| Term                                    | Count | %     | PValue   |
|-----------------------------------------|-------|-------|----------|
| GO:0031226~intrinsic to plasma membrane | 57    | 5.10% | 0.258809 |
| GO:0044459~plasma membrane part         | 87    | 7.78% | 0.295558 |
| GO:0005887~integral to plasma membrane  | 55    | 4.92% | 0.325735 |
| GO:0005886~plasma membrane              | 106   | 9.48% | 0.337539 |
| topological domain:Cytoplasmic          | 69    | 6.17% | 0.764369 |
| topological domain:Extracellular        | 43    | 3.85% | 0.99537  |

Median: 0.44945922077534506

Geo: 0.43464513235413105

| Term                                       | Count | %     | PValue   |
|--------------------------------------------|-------|-------|----------|
| GO:0051094~positive regulation of developm | 8     | 0.72% | 0.319107 |
| GO:0048871~multicellular organismal homeo  | 4     | 0.36% | 0.449459 |
| GO:0001894~tissue homeostasis              | 4     | 0.36% | 0.449459 |
| GO:0045453~bone resorption                 | 3     | 0.27% | 0.553633 |

Median: 0.685960066589173

Geo: 0.4362470704578489

| Term                                       | Count | %     | PValue   |
|--------------------------------------------|-------|-------|----------|
| GO:0018193~peptidyl-amino acid modificatio | 10    | 0.89% | 0.171207 |
| GO:0018108~peptidyl-tyrosine phosphorylati | 4     | 0.36% | 0.68596  |
| GO:0018212~peptidyl-tyrosine modification  | 4     | 0.36% | 0.706929 |

Median: 0.40963610445819626

Geo: 0.44729887337555274

| Term     | Count | %     | PValue   |
|----------|-------|-------|----------|
| repeat:2 | 6     | 0.54% | 0.388537 |

|          |   |       |          |
|----------|---|-------|----------|
| repeat:1 | 6 | 0.54% | 0.388537 |
| repeat:3 | 5 | 0.45% | 0.430735 |
| repeat:4 | 4 | 0.36% | 0.615625 |

|                                         |                         |       |          |
|-----------------------------------------|-------------------------|-------|----------|
| Median: 0.4774561483027405              | Geo: 0.4484195189382892 |       |          |
| Term                                    | Count                   | %     | PValue   |
| GO:0005739~mitochondrion                | 48                      | 4.29% | 0.270112 |
| GO:0031966~mitochondrial membrane       | 17                      | 1.52% | 0.338256 |
| GO:0019866~organelle inner membrane     | 15                      | 1.34% | 0.439673 |
| GO:0005743~mitochondrial inner membrane | 14                      | 1.25% | 0.470146 |
| GO:0005740~mitochondrial envelope       | 17                      | 1.52% | 0.484766 |
| GO:0031967~organelle envelope           | 23                      | 2.06% | 0.556712 |
| GO:0031975~envelope                     | 23                      | 2.06% | 0.556712 |
| GO:0044429~mitochondrial part           | 20                      | 1.79% | 0.576142 |

|                               |                         |       |          |
|-------------------------------|-------------------------|-------|----------|
| Median: 0.4293023416983348    | Geo: 0.4612341902779416 |       |          |
| Term                          | Count                   | %     | PValue   |
| GO:0015629~actin cytoskeleton | 15                      | 1.34% | 0.308413 |
| GO:0016459~myosin complex     | 5                       | 0.45% | 0.429302 |
| GO:0003774~motor activity     | 8                       | 0.72% | 0.741087 |

|                                             |                          |       |          |
|---------------------------------------------|--------------------------|-------|----------|
| Median: 0.48151244734237886                 | Geo: 0.47505105782779394 |       |          |
| Term                                        | Count                    | %     | PValue   |
| GO:0007368~determination of left/right symm | 3                        | 0.27% | 0.462387 |
| GO:0009855~determination of bilateral symm  | 3                        | 0.27% | 0.481512 |
| GO:0009799~determination of symmetry        | 3                        | 0.27% | 0.481512 |

|                                             |                         |       |          |
|---------------------------------------------|-------------------------|-------|----------|
| Median: 0.4460592396549603                  | Geo: 0.4885246371145563 |       |          |
| Term                                        | Count                   | %     | PValue   |
| GO:0015291~secondary active transmembran    | 13                      | 1.16% | 0.32978  |
| GO:0015293~symporter activity               | 9                       | 0.81% | 0.421411 |
| GO:0022804~active transmembrane transpor    | 22                      | 1.97% | 0.446059 |
| GO:0015294~solute:cation symporter activity | 5                       | 0.45% | 0.584325 |
| GO:0015370~solute:sodium symporter activit  | 3                       | 0.27% | 0.768165 |

|                                             |                         |       |          |
|---------------------------------------------|-------------------------|-------|----------|
| Median: 0.5088209052108131                  | Geo: 0.4962598576338997 |       |          |
| Term                                        | Count                   | %     | PValue   |
| GO:0042733~embryonic digit morphogenesis    | 3                       | 0.27% | 0.127677 |
| GO:0030326~embryonic limb morphogenesis     | 4                       | 0.36% | 0.494285 |
| GO:0035113~embryonic appendage morphog      | 4                       | 0.36% | 0.494285 |
| GO:0035108~limb morphogenesis               | 4                       | 0.36% | 0.508821 |
| GO:0035107~appendage morphogenesis          | 4                       | 0.36% | 0.508821 |
| GO:0048736~appendage development            | 4                       | 0.36% | 0.508821 |
| GO:0060173~limb development                 | 4                       | 0.36% | 0.508821 |
| GO:0007389~pattern specification process    | 10                      | 0.89% | 0.54639  |
| GO:0009952~anterior/posterior pattern forma | 5                       | 0.45% | 0.58499  |
| GO:0003002~regionalization                  | 6                       | 0.54% | 0.754437 |
| GO:0048598~embryonic morphogenesis          | 6                       | 0.54% | 0.89166  |

Median: 0.6014490269812658                      Geo: 0.4973764616269408

| Term                                        | Count | %     | PValue   |
|---------------------------------------------|-------|-------|----------|
| GO:0046466~membrane lipid catabolic proce   | 3     | 0.27% | 0.297004 |
| GO:0016042~lipid catabolic process          | 6     | 0.54% | 0.601449 |
| GO:0044242~cellular lipid catabolic process | 3     | 0.27% | 0.688803 |

Median: 0.8277224214823803                      Geo: 0.5022243656471842

| Term                              | Count | %     | PValue   |
|-----------------------------------|-------|-------|----------|
| propeptide:Removed in mature form | 9     | 0.81% | 0.175615 |
| GO:0048503~GPI anchor binding     | 3     | 0.27% | 0.827722 |
| gpi-anchor                        | 3     | 0.27% | 0.87146  |

Median: 0.7482201941461548                      Geo: 0.5043113219971841

| Term                    | Count | %     | PValue   |
|-------------------------|-------|-------|----------|
| IPR013089:Kelch related | 3     | 0.27% | 0.176793 |
| IPR013069:BTB/POZ       | 4     | 0.36% | 0.390294 |
| IPR011333:BTB/POZ fold  | 4     | 0.36% | 0.74822  |
| IPR000210:BTB/POZ-like  | 4     | 0.36% | 0.767953 |
| SM00225:BTB             | 4     | 0.36% | 0.82276  |

Median: 0.6629167877214965                      Geo: 0.5180844925108304

| Term                                       | Count | %     | PValue   |
|--------------------------------------------|-------|-------|----------|
| GO:0016891~endoribonuclease activity, prod | 3     | 0.27% | 0.280132 |
| GO:0016893~endonuclease activity, active w | 3     | 0.27% | 0.300856 |
| GO:0004519~endonuclease activity           | 5     | 0.45% | 0.636226 |
| GO:0004540~ribonuclease activity           | 4     | 0.36% | 0.689608 |
| GO:0004521~endoribonuclease activity       | 3     | 0.27% | 0.715294 |
| GO:0004518~nuclease activity               | 7     | 0.63% | 0.731114 |

Median: 0.5088209052108131                      Geo: 0.5218217098726277

| Term                                      | Count | %     | PValue   |
|-------------------------------------------|-------|-------|----------|
| GO:0042552~myelination                    | 4     | 0.36% | 0.464591 |
| GO:0007272~ensheathment of neurons        | 4     | 0.36% | 0.508821 |
| GO:0008366~axon ensheathment              | 4     | 0.36% | 0.508821 |
| GO:0001508~regulation of action potential | 4     | 0.36% | 0.616436 |

Median: 0.5849051118463864                      Geo: 0.5232757559198661

| Term                                          | Count | %     | PValue   |
|-----------------------------------------------|-------|-------|----------|
| IPR013087:Zinc finger, C2H2-type/integrase, I | 8     | 0.72% | 0.332645 |
| IPR015880:Zinc finger, C2H2-like              | 9     | 0.81% | 0.543597 |
| SM00355:ZnF_C2H2                              | 9     | 0.81% | 0.584905 |
| IPR007087:Zinc finger, C2H2-type              | 12    | 1.07% | 0.585557 |
| IPR001909:KRAB box                            | 3     | 0.27% | 0.633491 |

Median: 0.6445007927650344                      Geo: 0.5232873981612741

| Term                                    | Count | %     | PValue   |
|-----------------------------------------|-------|-------|----------|
| GO:0009401~phosphoenolpyruvate-depender | 3     | 0.27% | 0.189177 |

|                                           |   |       |          |
|-------------------------------------------|---|-------|----------|
| GO:0015293~symporter activity             | 9 | 0.81% | 0.421411 |
| GO:0005351~sugar:hydrogen ion symporter a | 3 | 0.27% | 0.610061 |
| GO:0051119~sugar transmembrane transport  | 3 | 0.27% | 0.67894  |
| GO:0015144~carbohydrate transmembrane t   | 3 | 0.27% | 0.748128 |
| GO:0008643~carbohydrate transport         | 4 | 0.36% | 0.831163 |

Median: 0.5536331420138444

Geo: 0.5271280856259419

| Term                                       | Count | %     | PValue   |
|--------------------------------------------|-------|-------|----------|
| GO:0000096~sulfur amino acid metabolic pro | 3     | 0.27% | 0.297004 |
| GO:0044272~sulfur compound biosynthetic p  | 3     | 0.27% | 0.553633 |
| GO:0006790~sulfur metabolic process        | 4     | 0.36% | 0.890767 |

Median: 0.601409864525576

Geo: 0.5314855310753033

| Term                                        | Count | %     | PValue   |
|---------------------------------------------|-------|-------|----------|
| GO:0051174~regulation of phosphorus metal   | 6     | 0.54% | 0.383436 |
| GO:0019220~regulation of phosphate metabo   | 6     | 0.54% | 0.383436 |
| GO:0042325~regulation of phosphorylation    | 5     | 0.45% | 0.562107 |
| GO:0001932~regulation of protein amino acic | 4     | 0.36% | 0.640713 |
| GO:0033238~regulation of amine metabolic p  | 4     | 0.36% | 0.652439 |
| GO:0006521~regulation of amino acid metab   | 4     | 0.36% | 0.652439 |

Median: 0.6966402340618993

Geo: 0.5381382996526384

| Term                                         | Count | %     | PValue   |
|----------------------------------------------|-------|-------|----------|
| GO:0050869~negative regulation of B cell act | 3     | 0.27% | 0.072716 |
| GO:0051250~negative regulation of lymphocy   | 3     | 0.27% | 0.382033 |
| GO:0002521~leukocyte differentiation         | 8     | 0.72% | 0.385125 |
| GO:0050864~regulation of B cell activation   | 3     | 0.27% | 0.442854 |
| GO:0030183~B cell differentiation            | 3     | 0.27% | 0.536282 |
| GO:0051249~regulation of lymphocyte activa   | 5     | 0.45% | 0.538554 |
| GO:0050865~regulation of cell activation     | 5     | 0.45% | 0.562107 |
| GO:0042113~B cell activation                 | 4     | 0.36% | 0.628711 |
| GO:0045321~leukocyte activation              | 11    | 0.98% | 0.69664  |
| GO:0050670~regulation of lymphocyte prolife  | 3     | 0.27% | 0.701535 |
| GO:0032944~regulation of mononuclear cell p  | 3     | 0.27% | 0.701535 |
| GO:0032943~mononuclear cell proliferation    | 4     | 0.36% | 0.706929 |
| GO:0046651~lymphocyte proliferation          | 4     | 0.36% | 0.706929 |
| GO:0051251~positive regulation of lymphocy   | 3     | 0.27% | 0.713831 |
| GO:0001775~cell activation                   | 12    | 1.07% | 0.731025 |
| GO:0046649~lymphocyte activation             | 8     | 0.72% | 0.773536 |
| GO:0030098~lymphocyte differentiation        | 4     | 0.36% | 0.795871 |

Median: 0.5464358420691726

Geo: 0.5464881667450793

| Term                | Count | %     | PValue   |
|---------------------|-------|-------|----------|
| repeat:LRR 4        | 4     | 0.36% | 0.296977 |
| repeat:LRR 3        | 4     | 0.36% | 0.37346  |
| repeat:LRR 2        | 4     | 0.36% | 0.411215 |
| repeat:LRR 1        | 4     | 0.36% | 0.411215 |
| leucine-rich repeat | 6     | 0.54% | 0.681657 |

|                                               |   |       |          |
|-----------------------------------------------|---|-------|----------|
| IPR001611:Leucine-rich repeat                 | 6 | 0.54% | 0.823577 |
| IPR003591:Leucine-rich repeat, typical subtyp | 3 | 0.27% | 0.862004 |
| SM00369:LRR_TYP                               | 3 | 0.27% | 0.876519 |

Median: 0.5819051364898118      Geo: 0.5596950020270177

| Term                                      | Count | %     | PValue   |
|-------------------------------------------|-------|-------|----------|
| GO:0048646~anatomical structure formation | 12    | 1.07% | 0.301312 |
| GO:0048514~blood vessel morphogenesis     | 10    | 0.89% | 0.54639  |
| GO:0001568~blood vessel development       | 11    | 0.98% | 0.577108 |
| GO:0001525~angiogenesis                   | 8     | 0.72% | 0.586703 |
| GO:0001944~vasculature development        | 11    | 0.98% | 0.605447 |
| GO:0009887~organ morphogenesis            | 19    | 1.70% | 0.910833 |

Median: 0.7146631166959486      Geo: 0.5600330435588263

| Term                                          | Count | %     | PValue   |
|-----------------------------------------------|-------|-------|----------|
| GO:0007626~locomotory behavior                | 13    | 1.16% | 0.260627 |
| rno04620:Toll-like receptor signaling pathway | 6     | 0.54% | 0.689423 |
| GO:0042330~taxis                              | 6     | 0.54% | 0.739903 |
| GO:0006935~chemotaxis                         | 6     | 0.54% | 0.739903 |

Median: 0.595986061875998      Geo: 0.5617526454231732

| Term                                                         | Count | %     | PValue   |
|--------------------------------------------------------------|-------|-------|----------|
| rno01040:Polyunsaturated fatty acid biosynth lipid synthesis | 3     | 0.27% | 0.319739 |
| lipid synthesis                                              | 5     | 0.45% | 0.462802 |
| fatty acid biosynthesis                                      | 3     | 0.27% | 0.516909 |
| GO:0006633~fatty acid biosynthetic process                   | 4     | 0.36% | 0.675063 |
| GO:0046394~carboxylic acid biosynthetic pro                  | 4     | 0.36% | 0.780118 |
| GO:0016053~organic acid biosynthetic proce:                  | 4     | 0.36% | 0.780118 |

Median: 0.6014490269812658      Geo: 0.5625121080973473

| Term                                 | Count | %     | PValue   |
|--------------------------------------|-------|-------|----------|
| GO:0004623~phospholipase A2 activity | 3     | 0.27% | 0.42142  |
| GO:0004091~carboxylesterase activity | 7     | 0.63% | 0.42217  |
| GO:0016042~lipid catabolic process   | 6     | 0.54% | 0.601449 |
| GO:0004620~phospholipase activity    | 4     | 0.36% | 0.668674 |
| GO:0016298~lipase activity           | 4     | 0.36% | 0.787124 |

Median: 0.5787287488791943      Geo: 0.5668905827307934

| Term                                         | Count | %     | PValue   |
|----------------------------------------------|-------|-------|----------|
| GO:0051128~regulation of cellular componen   | 6     | 0.54% | 0.33732  |
| GO:0008064~regulation of actin polymerizati  | 3     | 0.27% | 0.536282 |
| GO:0030832~regulation of actin filament leng | 3     | 0.27% | 0.553633 |
| GO:0032535~regulation of cellular componen   | 3     | 0.27% | 0.57052  |
| GO:0032956~regulation of actin cytoskeleton  | 3     | 0.27% | 0.586938 |
| GO:0051493~regulation of cytoskeleton organ  | 3     | 0.27% | 0.662001 |
| GO:0033043~regulation of organelle organiza  | 3     | 0.27% | 0.662001 |
| GO:0008154~actin polymerization and/or dep   | 3     | 0.27% | 0.7257   |

| Median: 0.5999486537353009                   | Geo: 0.5669168044626316 |       |          |
|----------------------------------------------|-------------------------|-------|----------|
| Term                                         | Count                   | %     | PValue   |
| GO:0043123~positive regulation of I-kappaB I | 6                       | 0.54% | 0.394966 |
| GO:0043122~regulation of I-kappaB kinase/N   | 6                       | 0.54% | 0.452147 |
| GO:0007249~I-kappaB kinase/NF-kappaB cas     | 7                       | 0.63% | 0.74775  |
| GO:0009967~positive regulation of signal tra | 8                       | 0.72% | 0.773536 |

| Median: 1.0                                 | Geo: 0.5670533146296532 |       |          |
|---------------------------------------------|-------------------------|-------|----------|
| Term                                        | Count                   | %     | PValue   |
| GO:0009582~detection of abiotic stimulus    | 5                       | 0.45% | 0.170357 |
| GO:0009581~detection of external stimulus   | 5                       | 0.45% | 0.26816  |
| GO:0050954~sensory perception of mechanic   | 5                       | 0.45% | 0.412681 |
| GO:0007608~sensory perception of smell      | 5                       | 0.45% | 1        |
| GO:0007606~sensory perception of chemical   | 6                       | 0.54% | 1        |
| GO:0050906~detection of stimulus during ser | 5                       | 0.45% | 1        |
| GO:0051606~detection of stimulus            | 7                       | 0.63% | 1        |

| Median: 0.609218857807939                    | Geo: 0.5802975779525337 |       |          |
|----------------------------------------------|-------------------------|-------|----------|
| Term                                         | Count                   | %     | PValue   |
| GO:0009890~negative regulation of biosynthe  | 4                       | 0.36% | 0.434156 |
| GO:0017148~negative regulation of translati  | 3                       | 0.27% | 0.57052  |
| GO:0031327~negative regulation of cellular b | 3                       | 0.27% | 0.647918 |
| GO:0051248~negative regulation of protein n  | 5                       | 0.45% | 0.706588 |

| Median: 0.6213308430829785               | Geo: 0.6021493472760941 |       |          |
|------------------------------------------|-------------------------|-------|----------|
| Term                                     | Count                   | %     | PValue   |
| IPR001440:Tetratricopeptide TPR-1        | 4                       | 0.36% | 0.509556 |
| IPR011990:Tetratricopeptide-like helical | 5                       | 0.45% | 0.592901 |
| TPR repeat                               | 4                       | 0.36% | 0.621331 |
| IPR013026:Tetratricopeptide region       | 4                       | 0.36% | 0.642694 |
| SM00028:TPR                              | 4                       | 0.36% | 0.656174 |

| Median: 0.6928277524443143                  | Geo: 0.6074386132124397 |       |          |
|---------------------------------------------|-------------------------|-------|----------|
| Term                                        | Count                   | %     | PValue   |
| GO:0055086~nucleobase, nucleoside and nuc   | 21                      | 1.88% | 0.079074 |
| GO:0009117~nucleotide metabolic process     | 19                      | 1.70% | 0.109776 |
| GO:0015992~proton transport                 | 7                       | 0.63% | 0.358964 |
| GO:0006163~purine nucleotide metabolic pro  | 8                       | 0.72% | 0.394626 |
| GO:0006818~hydrogen transport               | 7                       | 0.63% | 0.421131 |
| hydrogen ion transport                      | 4                       | 0.36% | 0.435119 |
| GO:0009144~purine nucleoside triphosphate   | 6                       | 0.54% | 0.46343  |
| GO:0009165~nucleotide biosynthetic process  | 10                      | 0.89% | 0.498742 |
| GO:0009141~nucleoside triphosphate metabo   | 6                       | 0.54% | 0.507789 |
| GO:0006164~purine nucleotide biosynthetic p | 6                       | 0.54% | 0.540067 |
| GO:0015077~monovalent inorganic cation tra  | 8                       | 0.72% | 0.566816 |
| GO:0009108~coenzyme biosynthetic process    | 6                       | 0.54% | 0.601449 |
| GO:0009199~ribonucleoside triphosphate me   | 5                       | 0.45% | 0.6286   |
| GO:0009205~purine ribonucleoside triphosph  | 5                       | 0.45% | 0.6286   |

|                                              |    |       |          |
|----------------------------------------------|----|-------|----------|
| GO:0016469~proton-transporting two-sector    | 4  | 0.36% | 0.632594 |
| GO:0009150~purine ribonucleotide metabolic   | 6  | 0.54% | 0.639677 |
| GO:0022890~inorganic cation transmembran     | 10 | 0.89% | 0.64058  |
| GO:0009152~purine ribonucleotide biosynthe   | 5  | 0.45% | 0.669169 |
| GO:0009201~ribonucleoside triphosphate bio   | 4  | 0.36% | 0.68596  |
| GO:0009206~purine ribonucleoside triphosph   | 4  | 0.36% | 0.68596  |
| GO:0009145~purine nucleoside triphosphate    | 4  | 0.36% | 0.68596  |
| GO:0015662~ATPase activity, coupled to tran  | 4  | 0.36% | 0.699695 |
| GO:0009259~ribonucleotide metabolic proces   | 6  | 0.54% | 0.700848 |
| GO:0009142~nucleoside triphosphate biosynt   | 4  | 0.36% | 0.706929 |
| GO:0009260~ribonucleotide biosynthetic proc  | 5  | 0.45% | 0.715446 |
| GO:0046034~ATP metabolic process             | 4  | 0.36% | 0.717004 |
| GO:0015405~P-P-bond-hydrolysis-driven tran:  | 9  | 0.81% | 0.733388 |
| GO:0015399~primary active transmembrane      | 9  | 0.81% | 0.733388 |
| GO:0046961~hydrogen ion transporting ATPa    | 3  | 0.27% | 0.737562 |
| GO:0015986~ATP synthesis coupled proton tr   | 3  | 0.27% | 0.748188 |
| GO:0043492~ATPase activity, coupled to mov   | 8  | 0.72% | 0.775888 |
| GO:0006753~nucleoside phosphate metaboli     | 3  | 0.27% | 0.788436 |
| GO:0006754~ATP biosynthetic process          | 3  | 0.27% | 0.788436 |
| GO:0015078~hydrogen ion transmembrane tr     | 6  | 0.54% | 0.788459 |
| GO:0042625~ATPase activity, coupled to tran  | 5  | 0.45% | 0.805609 |
| GO:0019829~cation-transporting ATPase acti   | 3  | 0.27% | 0.848745 |
| GO:0042626~ATPase activity, coupled to tran  | 7  | 0.63% | 0.871155 |
| GO:0006119~oxidative phosphorylation         | 4  | 0.36% | 0.876716 |
| GO:0016820~hydrolase activity, acting on aci | 7  | 0.63% | 0.888939 |
| GO:0042623~ATPase activity, coupled          | 12 | 1.07% | 0.897126 |
| rno00190:Oxidative phosphorylation           | 5  | 0.45% | 0.941111 |
| GO:0016887~ATPase activity                   | 13 | 1.16% | 0.952816 |

Median: 0.7013168766235801

Geo: 0.6297977628010818

| Term                                        | Count | %     | PValue   |
|---------------------------------------------|-------|-------|----------|
| GO:0048511~rhythmic process                 | 9     | 0.81% | 0.276768 |
| GO:0001541~ovarian follicle development     | 3     | 0.27% | 0.402649 |
| GO:0048608~reproductive structure developr  | 5     | 0.45% | 0.502071 |
| GO:0008406~gonad development                | 5     | 0.45% | 0.502071 |
| GO:0045137~development of primary sexual    | 5     | 0.45% | 0.596168 |
| GO:0022601~menstrual cycle phase            | 3     | 0.27% | 0.662001 |
| GO:0022602~menstrual cycle process          | 3     | 0.27% | 0.675627 |
| GO:0008585~female gonad development         | 3     | 0.27% | 0.688803 |
| GO:0046660~female sex differentiation       | 3     | 0.27% | 0.713831 |
| GO:0046545~development of primary female    | 3     | 0.27% | 0.713831 |
| GO:0042698~menstrual cycle                  | 3     | 0.27% | 0.7257   |
| GO:0007548~sex differentiation              | 5     | 0.45% | 0.756788 |
| GO:0003006~reproductive developmental prc   | 5     | 0.45% | 0.786396 |
| GO:0032504~multicellular organism reproduc  | 4     | 0.36% | 0.803388 |
| GO:0048609~reproductive process in a multix | 4     | 0.36% | 0.803388 |
| GO:0022414~reproductive process             | 13    | 1.16% | 0.835992 |



|                                   |                          |
|-----------------------------------|--------------------------|
| Median: 0.5984469718441101        | Geo: 0.6323830465290332  |
| Term                              | Count      %      PValue |
| GO:0007276~gamete generation      | 15    1.34%    0.566156  |
| GO:0048232~male gamete generation | 11    0.98%    0.598447  |
| GO:0007283~spermatogenesis        | 11    0.98%    0.598447  |
| GO:0019953~sexual reproduction    | 17    1.52%    0.624193  |
| GO:0000003~reproduction           | 25    2.24%    0.799089  |

|                                         |                          |
|-----------------------------------------|--------------------------|
| Median: 0.6418794153582141              | Geo: 0.6434810458513377  |
| Term                                    | Count      %      PValue |
| domain:C2 2                             | 3    0.27%    0.557944   |
| domain:C2 1                             | 3    0.27%    0.557944   |
| IPR000008:C2 calcium-dependent membrane | 5    0.45%    0.725815   |
| SM00239:C2                              | 5    0.45%    0.758815   |

|                                              |                          |
|----------------------------------------------|--------------------------|
| Median: 0.5705196311967391                   | Geo: 0.6563294464415198  |
| Term                                         | Count      %      PValue |
| GO:0040014~regulation of multicellular organ | 3    0.27%    0.536282   |
| GO:0035264~multicellular organism growth     | 3    0.27%    0.57052    |
| GO:0040008~regulation of growth              | 7    0.63%    0.924063   |

|                             |                          |
|-----------------------------|--------------------------|
| Median: 0.7446078402660412  | Geo: 0.6575850095074384  |
| Term                        | Count      %      PValue |
| GO:0000785~chromatin        | 10    0.89%    0.502927  |
| GO:0005694~chromosome       | 15    1.34%    0.744608  |
| GO:0044427~chromosomal part | 13    1.16%    0.759317  |

|                                                      |                          |
|------------------------------------------------------|--------------------------|
| Median: 0.5620393231910041                           | Geo: 0.6810252212277741  |
| Term                                                 | Count      %      PValue |
| GO:0001608~nucleotide receptor activity, G- $\gamma$ | 4    0.36%    0.562039   |
| GO:0016502~nucleotide receptor activity              | 4    0.36%    0.562039   |
| IPR000276:Rhodopsin-like GPCR superfamily            | 12    1.07%    0.999899  |

|                                     |                          |
|-------------------------------------|--------------------------|
| Median: 0.6427726332095793          | Geo: 0.7001764684951715  |
| Term                                | Count      %      PValue |
| IPR002126: Cadherin                 | 4    0.36%    0.61543    |
| SM00112:CA                          | 4    0.36%    0.642773   |
| GO:0007156~homophilic cell adhesion | 6    0.54%    0.867733   |

|                                               |                          |
|-----------------------------------------------|--------------------------|
| Median: 0.793690309997469                     | Geo: 0.7071541215403462  |
| Term                                          | Count      %      PValue |
| GO:0045860~positive regulation of protein kin | 9    0.81%    0.459439   |
| GO:0043405~regulation of MAP kinase activit   | 5    0.45%    0.764474   |
| GO:0000187~activation of MAPK activity        | 3    0.27%    0.822907   |
| GO:0043406~positive regulation of MAP kinas   | 3    0.27%    0.865197   |

|                           |                          |
|---------------------------|--------------------------|
| Median: 0.779359351302318 | Geo: 0.708304923911514   |
| Term                      | Count      %      PValue |

|                                          |    |       |          |
|------------------------------------------|----|-------|----------|
| GO:0009605~response to external stimulus | 42 | 3.76% | 0.465649 |
| GO:0006954~inflammatory response         | 17 | 1.52% | 0.676617 |
| GO:0009611~response to wounding          | 23 | 2.06% | 0.882102 |
| GO:0006952~defense response              | 22 | 1.97% | 0.905651 |

Median: 0.8552131779570957

Geo: 0.7091622268294516

| Term                                        | Count | %     | PValue   |
|---------------------------------------------|-------|-------|----------|
| GO:0022892~substrate-specific transporter a | 65    | 5.81% | 0.10346  |
| GO:0005215~transporter activity             | 81    | 7.25% | 0.112579 |
| GO:0022891~substrate-specific transmembra   | 48    | 4.29% | 0.401987 |
| GO:0022857~transmembrane transporter act    | 52    | 4.65% | 0.446023 |
| transport                                   | 57    | 5.10% | 0.500143 |
| GO:0022890~inorganic cation transmembran    | 10    | 0.89% | 0.64058  |
| GO:0015075~ion transmembrane transporter    | 37    | 3.31% | 0.666394 |
| GO:0006811~ion transport                    | 40    | 3.58% | 0.704556 |
| GO:0006813~potassium ion transport          | 8     | 0.72% | 0.743226 |
| potassium                                   | 6     | 0.54% | 0.751663 |
| GO:0030955~potassium ion binding            | 5     | 0.45% | 0.779334 |
| GO:0008324~cation transmembrane transpor    | 26    | 2.33% | 0.820017 |
| potassium transport                         | 5     | 0.45% | 0.823461 |
| ion transport                               | 22    | 1.97% | 0.854332 |
| GO:0022803~passive transmembrane transp     | 17    | 1.52% | 0.855213 |
| GO:0015267~channel activity                 | 17    | 1.52% | 0.855213 |
| Ionic channel                               | 13    | 1.16% | 0.888466 |
| voltage-gated channel                       | 6     | 0.54% | 0.896856 |
| GO:0015672~monovalent inorganic cation tra  | 14    | 1.25% | 0.89821  |
| GO:0006812~cation transport                 | 23    | 2.06% | 0.925976 |
| GO:0030001~metal ion transport              | 18    | 1.61% | 0.928702 |
| GO:0022836~gated channel activity           | 11    | 0.98% | 0.933086 |
| GO:0005216~ion channel activity             | 14    | 1.25% | 0.940465 |
| GO:0031420~alkali metal ion binding         | 6     | 0.54% | 0.950483 |
| GO:0046873~metal ion transmembrane trans    | 12    | 1.07% | 0.950868 |
| GO:0022838~substrate specific channel activ | 14    | 1.25% | 0.954803 |
| GO:0022832~voltage-gated channel activity   | 6     | 0.54% | 0.957042 |
| GO:0005244~voltage-gated ion channel activ  | 6     | 0.54% | 0.957042 |
| GO:0005267~potassium channel activity       | 4     | 0.36% | 0.973171 |
| GO:0005261~cation channel activity          | 8     | 0.72% | 0.988112 |
| GO:0022843~voltage-gated cation channel ac  | 3     | 0.27% | 0.996715 |

Median: 0.6691685395032168

Geo: 0.7168766539023791

| Term                                       | Count | %     | PValue   |
|--------------------------------------------|-------|-------|----------|
| GO:0007179~transforming growth factor beta | 4     | 0.36% | 0.616436 |
| GO:0007178~transmembrane receptor protei   | 5     | 0.45% | 0.669169 |
| GO:0007167~enzyme linked receptor protein  | 12    | 1.07% | 0.89312  |

Median: 0.6660073746312482

Geo: 0.7181513531178823

| Term                           | Count | %     | PValue   |
|--------------------------------|-------|-------|----------|
| GO:0004601~peroxidase activity | 3     | 0.27% | 0.666007 |

GO:0016684~oxidoreductase activity, acting on NADPH and NADP+ as oxidant 3 0.27% 0.666007  
GO:0016209~antioxidant activity 3 0.27% 0.835007

Median: 0.7350892210174229

Geo: 0.7192759782543552

| Term                                   | Count | %     | PValue   |
|----------------------------------------|-------|-------|----------|
| GO:0042692~muscle cell differentiation | 4     | 0.36% | 0.591074 |
| GO:0014706~striated muscle development | 6     | 0.54% | 0.648871 |
| GO:0007517~muscle development          | 8     | 0.72% | 0.821308 |
| GO:0007519~skeletal muscle development | 4     | 0.36% | 0.849722 |

Median: 0.9984766275751946

Geo: 0.7250339984678495

| Term                              | Count | %     | PValue   |
|-----------------------------------|-------|-------|----------|
| GO:0048029~monosaccharide binding | 3     | 0.27% | 0.382226 |
| GO:0030246~carbohydrate binding   | 8     | 0.72% | 0.998477 |
| GO:0005529~sugar binding          | 5     | 0.45% | 0.998658 |

Median: 0.7884358417100072

Geo: 0.7321529665083604

| Term                                      | Count | %     | PValue   |
|-------------------------------------------|-------|-------|----------|
| GO:0006730~one-carbon compound metabolism | 6     | 0.54% | 0.571327 |
| GO:0043414~biopolymer methylation         | 3     | 0.27% | 0.788436 |
| GO:0032259~methylation                    | 3     | 0.27% | 0.871273 |

Median: 0.6691685395032168

Geo: 0.7523899992015123

| Term                                    | Count | %     | PValue   |
|-----------------------------------------|-------|-------|----------|
| GO:0051789~response to protein stimulus | 5     | 0.45% | 0.669169 |
| GO:0006986~response to unfolded protein | 5     | 0.45% | 0.669169 |
| GO:0009607~response to biotic stimulus  | 8     | 0.72% | 0.95117  |

Median: 0.7994349606199997

Geo: 0.7551374387493411

| Term                          | Count | %     | PValue   |
|-------------------------------|-------|-------|----------|
| Mitochondrion                 | 23    | 2.06% | 0.658318 |
| transit peptide               | 12    | 1.07% | 0.799435 |
| transit peptide:Mitochondrion | 9     | 0.81% | 0.8182   |

Median: 0.8350065324763454

Geo: 0.7573085527457687

| Term                                          | Count | %     | PValue   |
|-----------------------------------------------|-------|-------|----------|
| GO:0030594~neurotransmitter receptor activity | 7     | 0.63% | 0.565097 |
| GO:0042165~neurotransmitter binding           | 7     | 0.63% | 0.642168 |
| GO:0004983~neuropeptide Y receptor activity   | 3     | 0.27% | 0.652657 |
| GO:0008188~neuropeptide receptor activity     | 3     | 0.27% | 0.835007 |
| GO:0042923~neuropeptide binding               | 3     | 0.27% | 0.835007 |
| GO:0042277~peptide binding                    | 9     | 0.81% | 0.886941 |
| GO:0001653~peptide receptor activity          | 4     | 0.36% | 0.975391 |

Median: 0.7481884961189249

Geo: 0.7666946662279888

| Term                                             | Count | %     | PValue   |
|--------------------------------------------------|-------|-------|----------|
| GO:0002009~morphogenesis of an epithelium        | 6     | 0.54% | 0.675549 |
| GO:0016331~morphogenesis of embryonic epithelium | 3     | 0.27% | 0.748188 |

GO:0048598~embryonic morphogenesis 6 0.54% 0.89166

Median: 0.8437420023447036

Geo: 0.7823281244291606

| Term                                      | Count | %     | PValue   |
|-------------------------------------------|-------|-------|----------|
| GO:0016064~immunoglobulin mediated immu   | 4     | 0.36% | 0.523135 |
| GO:0019724~B cell mediated immunity       | 4     | 0.36% | 0.55106  |
| GO:0002449~lymphocyte mediated immunity   | 4     | 0.36% | 0.663889 |
| GO:0002460~adaptive immune response bas   | 4     | 0.36% | 0.706929 |
| GO:0002250~adaptive immune response       | 4     | 0.36% | 0.706929 |
| GO:0002443~leukocyte mediated immunity    | 4     | 0.36% | 0.754627 |
| GO:0006959~humoral immune response        | 4     | 0.36% | 0.843742 |
| GO:0050776~regulation of immune response  | 5     | 0.45% | 0.847884 |
| GO:0002682~regulation of immune system pi | 5     | 0.45% | 0.872566 |
| immune response                           | 3     | 0.27% | 0.955648 |
| GO:0002252~immune effector process        | 4     | 0.36% | 0.971089 |
| GO:0002526~acute inflammatory response    | 3     | 0.27% | 0.98349  |
| GO:0006955~immune response                | 12    | 1.07% | 0.999982 |

Median: 0.8311187328631705

Geo: 0.7899641669263333

| Term                             | Count | %     | PValue   |
|----------------------------------|-------|-------|----------|
| GO:0031965~nuclear membrane      | 5     | 0.45% | 0.656212 |
| GO:0044453~nuclear membrane part | 4     | 0.36% | 0.771129 |
| GO:0005635~nuclear envelope      | 6     | 0.54% | 0.831119 |
| GO:0005643~nuclear pore          | 3     | 0.27% | 0.833261 |
| GO:0046930~pore complex          | 3     | 0.27% | 0.877853 |

Median: 0.8000862740701508

Geo: 0.7916258582136574

| Term                                     | Count | %     | PValue   |
|------------------------------------------|-------|-------|----------|
| GO:0042107~cytokine metabolic process    | 4     | 0.36% | 0.706929 |
| GO:0001816~cytokine production           | 5     | 0.45% | 0.800086 |
| GO:0042089~cytokine biosynthetic process | 3     | 0.27% | 0.877096 |

Median: 0.758827055718108

Geo: 0.7991755408655077

| Term                                        | Count | %     | PValue   |
|---------------------------------------------|-------|-------|----------|
| GO:0006497~protein amino acid lipidation    | 3     | 0.27% | 0.7257   |
| GO:0042158~lipoprotein biosynthetic process | 3     | 0.27% | 0.758827 |
| GO:0042157~lipoprotein metabolic process    | 3     | 0.27% | 0.926887 |

Median: 0.8160828494606095

Geo: 0.8081255298438712

| Term                           | Count | %     | PValue   |
|--------------------------------|-------|-------|----------|
| GO:0016337~cell-cell adhesion  | 13    | 1.16% | 0.792443 |
| GO:0022610~biological adhesion | 30    | 2.68% | 0.816083 |
| GO:0007155~cell adhesion       | 30    | 2.68% | 0.816083 |

Median: 0.9232974364126381

Geo: 0.8238423678796846

| Term                                   | Count | %     | PValue   |
|----------------------------------------|-------|-------|----------|
| GO:0016126~sterol biosynthetic process | 3     | 0.27% | 0.536282 |
| GO:0016125~sterol metabolic process    | 4     | 0.36% | 0.831163 |

|                                          |   |       |          |
|------------------------------------------|---|-------|----------|
| GO:0008203~cholesterol metabolic process | 3 | 0.27% | 0.923297 |
| GO:0006694~steroid biosynthetic process  | 3 | 0.27% | 0.936727 |
| GO:0008202~steroid metabolic process     | 5 | 0.45% | 0.984434 |

Median: 0.9362941363435059

Geo: 0.8360218956586637

| Term                                         | Count | %     | PValue   |
|----------------------------------------------|-------|-------|----------|
| GO:0005843~cytosolic small ribosomal subun   | 3     | 0.27% | 0.408313 |
| GO:0015935~small ribosomal subunit           | 3     | 0.27% | 0.733306 |
| ribonucleoprotein                            | 8     | 0.72% | 0.797397 |
| GO:0005830~cytosolic ribosome (sensu Euka    | 3     | 0.27% | 0.818051 |
| rno03010:Ribosome                            | 4     | 0.36% | 0.848076 |
| GO:0033279~ribosomal subunit                 | 4     | 0.36% | 0.936294 |
| ribosomal protein                            | 5     | 0.45% | 0.941543 |
| ribosome                                     | 3     | 0.27% | 0.958014 |
| GO:0030529~ribonucleoprotein complex         | 17    | 1.52% | 0.996945 |
| GO:0003735~structural constituent of ribosor | 7     | 0.63% | 0.999988 |
| GO:0005840~ribosome                          | 7     | 0.63% | 0.999957 |

Median: 0.8700920567964969

Geo: 0.8419358538470354

| Term                                      | Count | %     | PValue   |
|-------------------------------------------|-------|-------|----------|
| GO:0003777~microtubule motor activity     | 4     | 0.36% | 0.728459 |
| GO:0007018~microtubule-based movement     | 5     | 0.45% | 0.847884 |
| GO:0005875~microtubule associated comple; | 5     | 0.45% | 0.8923   |
| GO:0030705~cytoskeleton-dependent intrace | 5     | 0.45% | 0.911724 |

Median: 0.8453599387629621

Geo: 0.8498359253984246

| Term                                     | Count | %     | PValue   |
|------------------------------------------|-------|-------|----------|
| GO:0007126~meiosis                       | 3     | 0.27% | 0.84536  |
| GO:0051327~M phase of meiotic cell cycle | 3     | 0.27% | 0.84536  |
| GO:0051321~meiotic cell cycle            | 3     | 0.27% | 0.858859 |

Median: 0.8437813998480348

Geo: 0.861373682922828

| Term                                 | Count | %     | PValue   |
|--------------------------------------|-------|-------|----------|
| GO:0005615~extracellular space       | 88    | 7.87% | 0.774662 |
| GO:0044421~extracellular region part | 91    | 8.14% | 0.843781 |
| GO:0005576~extracellular region      | 94    | 8.41% | 0.97776  |

Median: 0.8877030784420337

Geo: 0.866705571947067

| Term                                     | Count | %     | PValue   |
|------------------------------------------|-------|-------|----------|
| GO:0015179~L-amino acid transmembrane tr | 3     | 0.27% | 0.666007 |
| GO:0006865~amino acid transport          | 4     | 0.36% | 0.837557 |
| GO:0015171~amino acid transmembrane trar | 3     | 0.27% | 0.848745 |
| GO:0046942~carboxylic acid transport     | 5     | 0.45% | 0.885656 |
| GO:0015849~organic acid transport        | 5     | 0.45% | 0.889751 |
| GO:0015837~amine transport               | 4     | 0.36% | 0.924703 |
| GO:0046943~carboxylic acid transmembrane | 3     | 0.27% | 0.95976  |
| GO:0005342~organic acid transmembrane tr | 3     | 0.27% | 0.961621 |

| Median: 0.9354118585438735                    | Geo: 0.8733251539872539 |       |          |
|-----------------------------------------------|-------------------------|-------|----------|
| Term                                          | Count                   | %     | PValue   |
| IPR000047:Helix-turn-helix motif, lambda-like | 3                       | 0.27% | 0.633491 |
| IPR001356:Homeobox                            | 5                       | 0.45% | 0.921786 |
| SM00389:HOX                                   | 5                       | 0.45% | 0.935412 |
| IPR012287:Homeodomain-related                 | 4                       | 0.36% | 0.95928  |
| Homeobox                                      | 4                       | 0.36% | 0.969529 |

| Median: 0.9013406927694274                  | Geo: 0.8824357299623315 |       |          |
|---------------------------------------------|-------------------------|-------|----------|
| Term                                        | Count                   | %     | PValue   |
| GO:0045792~negative regulation of cell size | 3                       | 0.27% | 0.748188 |
| GO:0016049~cell growth                      | 7                       | 0.63% | 0.869474 |
| GO:0008361~regulation of cell size          | 7                       | 0.63% | 0.891665 |
| GO:0040007~growth                           | 13                      | 1.16% | 0.911017 |
| GO:0040008~regulation of growth             | 7                       | 0.63% | 0.924063 |
| GO:0001558~regulation of cell growth        | 4                       | 0.36% | 0.966943 |

| Median: 0.8924802767520075                     | Geo: 0.8834873488794694 |       |          |
|------------------------------------------------|-------------------------|-------|----------|
| Term                                           | Count                   | %     | PValue   |
| GO:0006816~calcium ion transport               | 6                       | 0.54% | 0.823628 |
| calcium transport                              | 3                       | 0.27% | 0.889928 |
| GO:0015674~di-, tri-valent inorganic cation tr | 7                       | 0.63% | 0.895033 |
| GO:0030001~metal ion transport                 | 18                      | 1.61% | 0.928702 |

| Median: 0.981699345405155                | Geo: 0.8890739249359461 |       |          |
|------------------------------------------|-------------------------|-------|----------|
| Term                                     | Count                   | %     | PValue   |
| GO:0009897~external side of plasma membr | 6                       | 0.54% | 0.404713 |
| IPR003598:Immunoglobulin subtype 2       | 4                       | 0.36% | 0.945364 |
| SM00408:IGc2                             | 4                       | 0.36% | 0.963565 |
| IPR013151:Immunoglobulin                 | 4                       | 0.36% | 0.971303 |
| SM00409:IG                               | 7                       | 0.63% | 0.981699 |
| IPR003599:Immunoglobulin subtype         | 5                       | 0.45% | 0.99162  |
| immunoglobulin domain                    | 6                       | 0.54% | 0.996245 |
| IPR007110:Immunoglobulin-like            | 8                       | 0.72% | 0.999529 |
| IPR013783:Immunoglobulin-like fold       | 7                       | 0.63% | 0.999939 |

| Median: 0.8515833251974014        | Geo: 0.8906688475145337 |       |          |
|-----------------------------------|-------------------------|-------|----------|
| Term                              | Count                   | %     | PValue   |
| GO:0046906~tetrapyrrole binding   | 8                       | 0.72% | 0.851583 |
| GO:0020037~heme binding           | 8                       | 0.72% | 0.851583 |
| GO:0004497~monooxygenase activity | 4                       | 0.36% | 0.974304 |

| Median: 0.9962434132282394     | Geo: 0.8976463845659044 |        |          |
|--------------------------------|-------------------------|--------|----------|
| Term                           | Count                   | %      | PValue   |
| membrane                       | 163                     | 14.58% | 0.3784   |
| topological domain:Cytoplasmic | 69                      | 6.17%  | 0.764369 |
| transmembrane region           | 83                      | 7.42%  | 0.872932 |
| transmembrane                  | 117                     | 10.47% | 0.910233 |

|                                                                   |     |        |          |
|-------------------------------------------------------------------|-----|--------|----------|
| GO:0044425~membrane part                                          | 261 | 23.35% | 0.977345 |
| GO:0016020~membrane topological domain:Extracellular glycoprotein | 313 | 28.00% | 0.991044 |
| glycosylation site:N-linked (GlcNAc...)                           | 43  | 3.85%  | 0.99537  |
| signal                                                            | 85  | 7.60%  | 0.997117 |
| GO:0031224~intrinsic to membrane                                  | 68  | 6.08%  | 0.998767 |
| GO:0016021~integral to membrane                                   | 60  | 5.37%  | 0.999805 |
| disulfide bond                                                    | 216 | 19.32% | 0.999831 |
| signal peptide                                                    | 214 | 19.14% | 0.999877 |
|                                                                   | 43  | 3.85%  | 0.999931 |
|                                                                   | 51  | 4.56%  | 0.999983 |

Median: 0.9770492762883788

Geo: 0.898924811484142

| Term                                        | Count | %     | PValue   |
|---------------------------------------------|-------|-------|----------|
| Serine protease inhibitor                   | 3     | 0.27% | 0.659227 |
| protease inhibitor                          | 3     | 0.27% | 0.850183 |
| GO:0004867~serine-type endopeptidase inhib  | 3     | 0.27% | 0.963399 |
| GO:0004866~endopeptidase inhibitor activity | 4     | 0.36% | 0.9907   |
| GO:0030414~protease inhibitor activity      | 4     | 0.36% | 0.991503 |
| GO:0004857~enzyme inhibitor activity        | 7     | 0.63% | 0.994834 |

Median: 0.9024340852042524

Geo: 0.8997282058107576

| Term                            | Count | %     | PValue   |
|---------------------------------|-------|-------|----------|
| GO:0042060~wound healing        | 8     | 0.72% | 0.839849 |
| GO:0042246~tissue regeneration  | 3     | 0.27% | 0.871273 |
| GO:0031099~regeneration         | 3     | 0.27% | 0.933595 |
| GO:0048589~developmental growth | 3     | 0.27% | 0.959249 |

Median: 0.9522219354712798

Geo: 0.9072825421771014

| Term                                         | Count | %     | PValue   |
|----------------------------------------------|-------|-------|----------|
| GO:0005201~extracellular matrix structural c | 4     | 0.36% | 0.771531 |
| GO:0044420~extracellular matrix part         | 4     | 0.36% | 0.89221  |
| GO:0005578~proteinaceous extracellular mat   | 9     | 0.81% | 0.952222 |
| GO:0031012~extracellular matrix              | 9     | 0.81% | 0.963879 |
| extracellular matrix                         | 3     | 0.27% | 0.973042 |

Median: 0.9356066609929128

Geo: 0.9188051673289847

| Term                                         | Count | %     | PValue   |
|----------------------------------------------|-------|-------|----------|
| GO:0050776~regulation of immune response     | 5     | 0.45% | 0.847884 |
| GO:0002682~regulation of immune system pi    | 5     | 0.45% | 0.872566 |
| GO:0002253~activation of immune response     | 3     | 0.27% | 0.926887 |
| GO:0051240~positive regulation of multicellu | 5     | 0.45% | 0.944326 |
| GO:0050778~positive regulation of immune r   | 3     | 0.27% | 0.961214 |
| GO:0002684~positive regulation of immune s   | 3     | 0.27% | 0.966578 |

Median: 0.9414350302664871

Geo: 0.9229533304598382

| Term                                 | Count | %     | PValue   |
|--------------------------------------|-------|-------|----------|
| GO:0008201~heparin binding           | 3     | 0.27% | 0.795615 |
| GO:0005539~glycosaminoglycan binding | 3     | 0.27% | 0.929526 |

|                                   |   |       |          |
|-----------------------------------|---|-------|----------|
| GO:0030247~polysaccharide binding | 3 | 0.27% | 0.941435 |
| GO:0001871~pattern binding        | 3 | 0.27% | 0.963399 |
| GO:0030246~carbohydrate binding   | 8 | 0.72% | 0.998477 |

Median: 0.9456647511946196

Term

|                                   |    |       |          |
|-----------------------------------|----|-------|----------|
| GO:0006508~proteolysis            | 36 | 3.22% | 0.876179 |
| GO:0008233~peptidase activity     | 28 | 2.50% | 0.945665 |
| GO:0004175~endopeptidase activity | 16 | 1.43% | 0.98724  |

Geo: 0.9352281958909899

Count      %      PValue

Median: 0.9504320986748979

Term

|                   |   |       |          |
|-------------------|---|-------|----------|
| ank repeat        | 4 | 0.36% | 0.916184 |
| IPR002110:Ankyrin | 4 | 0.36% | 0.950432 |
| SM00248:ANK       | 4 | 0.36% | 0.957554 |

Geo: 0.9412154711720149

Count      %      PValue

Median: 0.9658152263361006

Term

|                                   |   |       |          |
|-----------------------------------|---|-------|----------|
| growth factor                     | 4 | 0.36% | 0.962854 |
| GO:0005125~cytokine activity      | 8 | 0.72% | 0.965815 |
| GO:0008083~growth factor activity | 4 | 0.36% | 0.9907   |

Geo: 0.9730433063544447

Count      %      PValue
