# Supplementary material for: Gene Expression Patterns Underlying the Reinstatement of Plasticity in the Adult Visual System
Source: Hindawi journal article supplement (doi:10.1155/2013/605079), 2013-01-01
Supplement: f2 [file 605079.f2.pdf]

Supplementary Table 1

| ID            | logFC    | t        | P.Value  | B        | GenbankAccession | UniGeneID |
|---------------|----------|----------|----------|----------|------------------|-----------|
| A_44_P505500  | 1.607556 | 3.752646 | 0.00122  | -3.55829 | CK358354         | Rn.91828  |
| A_43_P12141   | 1.561647 | 3.810252 | 0.001065 | -3.53561 | NM_021869        | Rn.1993   |
| A_44_P992854  | 1.324382 | 3.501498 | 0.002197 | -3.65908 | NM_057132        | Rn.107401 |
| A_44_P196717  | 1.318426 | 3.242831 | 0.004003 | -3.7657  | XM_344970        | Rn.154758 |
| A_44_P113842  | 1.173214 | 4.709021 | 0.000128 | -3.20753 | NM_022210        | Rn.4210   |
| A_44_P403482  | 1.15254  | 4.076258 | 0.000569 | -3.4333  | XM_213493        | Rn.107395 |
| A_44_P248111  | 1.143281 | 5.541433 | 1.87E-05 | -2.95081 | NM_001047107     | Rn.198138 |
| A_43_P16511   | 1.072354 | 2.854558 | 0.009672 | -3.92914 | NM_001044300     | Rn.19946  |
| A_42_P522171  | 1.030953 | 3.730579 | 0.001285 | -3.56702 | XM_001081512     |           |
| A_44_P223252  | 1.015676 | 2.880587 | 0.009124 | -3.91812 | NM_031595        | Rn.11173  |
| A_44_P239105  | 1.014573 | 3.317443 | 0.003369 | -3.7347  | XM_233341        | Rn.23612  |
| A_44_P563128  | 1.013565 | 3.964694 | 0.00074  | -3.47572 | XR_007778        | Rn.161878 |
| A_44_P864185  | 0.99365  | 3.198517 | 0.004432 | -3.78419 | AW142955         | Rn.24135  |
| A_44_P255954  | 0.985852 | 2.916596 | 0.008416 | -3.90288 | XM_573223        | Rn.21595  |
| A_44_P548507  | 0.976934 | 3.322881 | 0.003327 | -3.73245 | NM_032083        | Rn.11166  |
| A_42_P713975  | 0.96633  | 3.382278 | 0.002899 | -3.70791 | BC082799         | Rn.30992  |
| A_43_P13247   | 0.945033 | 3.704721 | 0.001365 | -3.57728 | XM_001070141     | Rn.64489  |
| A_44_P187789  | 0.919478 | 3.765582 | 0.001183 | -3.55318 | XM_001066818     | Rn.98517  |
| A_43_P16512   | 0.917668 | 2.964885 | 0.007548 | -3.88245 | XM_218824        | Rn.3618   |
| A_44_P769703  | 0.915946 | 2.855509 | 0.009651 | -3.92874 | NM_178096        | Rn.8180   |
| A_44_P210461  | 0.909428 | 3.068536 | 0.005967 | -3.83872 | NM_017025        | Rn.107896 |
| A_44_P176606  | 0.891879 | 3.077713 | 0.005843 | -3.83486 | NM_001007235     | Rn.2135   |
| A_44_P480605  | 0.877686 | 2.898617 | 0.008763 | -3.91049 | XM_001066230     | Rn.196993 |
| A_44_P1029397 | 0.874681 | 3.029251 | 0.006524 | -3.85528 | NM_198134        | Rn.32168  |
| A_44_P463858  | 0.858747 | 3.837533 | 0.000999 | -3.52494 | NM_133303        | Rn.10784  |
| A_44_P189326  | 0.845271 | 3.308173 | 0.003442 | -3.73854 | NM_017319        | Rn.11527  |
| A_43_P10162   | 0.837812 | 2.967703 | 0.0075   | -3.88126 | XM_224841        | Rn.206094 |
| A_43_P11622   | 0.797153 | 3.378305 | 0.002926 | -3.70955 | NM_012925        | Rn.1231   |
| A_44_P552865  | 0.794559 | 2.92484  | 0.008261 | -3.89939 | XM_221896        | Rn.25814  |
| A_44_P508264  | 0.752347 | 3.526847 | 0.002071 | -3.64878 | NM_031762        | Rn.29897  |
| A_44_P424570  | 0.739812 | 3.454555 | 0.002451 | -3.67824 | XM_235521        | Rn.3893   |
| A_43_P12779   | 0.734704 | 3.025752 | 0.006576 | -3.85675 | NM_053346        | Rn.3546   |
| A_44_P379976  | 0.719224 | 2.852731 | 0.009711 | -3.92992 | NM_001024782     | Rn.33512  |
| A_44_P797926  | 0.71717  | 2.871817 | 0.009305 | -3.92183 | BG673275         | Rn.199501 |
| A_44_P506374  | 0.709429 | 3.190639 | 0.004513 | -3.78748 | XM_001073596     | Rn.133954 |
| A_44_P356658  | 0.709393 | 2.874548 | 0.009249 | -3.92068 | XM_219716        | Rn.28086  |
| A_44_P108421  | 0.689004 | 3.061731 | 0.00606  | -3.84159 | XM_224350        | Rn.100627 |
| A_43_P16811   | 0.685518 | 2.937183 | 0.008035 | -3.89417 | NM_001014073     | Rn.12770  |
| A_44_P473322  | 0.680296 | 3.094868 | 0.005619 | -3.82764 | XM_224778        |           |
| A_44_P417077  | 0.679432 | 3.552775 | 0.001949 | -3.63826 | XM_573664        | Rn.63942  |
| A_44_P403410  | 0.65013  | 3.218297 | 0.004235 | -3.77593 | NM_001079895     | Rn.137551 |
| A_44_P714315  | 0.649504 | 3.019091 | 0.006677 | -3.85956 | CO404950         | Rn.45255  |
| A_44_P501483  | 0.646159 | 3.063059 | 0.006042 | -3.84103 | XR_006667        | Rn.216235 |
| A_44_P156966  | 0.642122 | 2.94394  | 0.007913 | -3.89131 | XM_228708        | Rn.106891 |
| A_44_P350794  | 0.5956   | 2.869386 | 0.009356 | -3.92286 | AA894317         | Rn.11166  |
| A_43_P10735   | 0.590686 | 2.854672 | 0.009669 | -3.9291  | BF555100         | Rn.168452 |
| A_43_P17622   | 0.586863 | 3.108625 | 0.005446 | -3.82186 | XM_345870        | Rn.52275  |
| A_42_P704370  | 0.57628  | 2.905127 | 0.008636 | -3.90773 | NM_023972        | Rn.64512  |
| A_44_P448307  | 0.576147 | 3.209166 | 0.004325 | -3.77974 | XM_217432        | Rn.93317  |
| A_44_P473472  | 0.569886 | 2.910531 | 0.008531 | -3.90544 | BC091233         | Rn.9497   |
| A_43_P21003   | 0.560543 | 3.007822 | 0.006849 | -3.86432 | NM_001033892     | Rn.98615  |
| A_44_P738831  | 0.55264  | 3.209084 | 0.004326 | -3.77977 | BE105152         | Rn.148459 |

|               |          |          |          |          |              |           |
|---------------|----------|----------|----------|----------|--------------|-----------|
| A_44_P189813  | 0.551359 | 3.113113 | 0.00539  | -3.81998 | XM_214295    | Rn.105830 |
| A_44_P161220  | 0.542591 | 2.893728 | 0.008859 | -3.91256 | NM_080482    | Rn.211646 |
| A_43_P19892   | 0.536862 | 3.04624  | 0.006277 | -3.84811 | NM_001014255 | Rn.22786  |
| A_44_P108680  | 0.53537  | 3.014469 | 0.006747 | -3.86151 | NM_057116    | Rn.54550  |
| A_44_P229618  | 0.527464 | 2.895836 | 0.008818 | -3.91166 | XM_228065    | Rn.46413  |
| A_44_P255236  | 0.525992 | 2.841785 | 0.009952 | -3.93456 | NM_019212    | Rn.82732  |
| A_44_P455065  | 0.518588 | 3.05703  | 0.006125 | -3.84357 | XM_001077680 | Rn.2153   |
| A_44_P208275  | 0.511361 | 3.692287 | 0.001406 | -3.58223 | NM_031795    | Rn.24091  |
| A_43_P15848   | 0.510606 | 2.965172 | 0.007543 | -3.88233 | M81783       | Rn.91148  |
| A_44_P180294  | 0.507879 | 3.015028 | 0.006738 | -3.86128 | XM_344235    |           |
| A_44_P180676  | 0.507554 | 3.147503 | 0.004982 | -3.80554 | XM_341141    | Rn.206334 |
| A_44_P274573  | 0.507395 | 2.967906 | 0.007497 | -3.88118 | XM_232283    | Rn.21111  |
| A_44_P222865  | 0.490304 | 2.871324 | 0.009316 | -3.92204 | XR_006686    | Rn.197425 |
| A_44_P101023  | 0.487674 | 2.909696 | 0.008547 | -3.9058  | XM_239335    | Rn.22437  |
| A_44_P194863  | 0.470415 | 3.085206 | 0.005744 | -3.83171 | XM_220574    | Rn.102346 |
| A_42_P573610  | 0.468416 | 3.286319 | 0.003621 | -3.74761 | XM_233544    | Rn.62413  |
| A_44_P142843  | 0.46753  | 2.877131 | 0.009195 | -3.91958 | XM_001065442 | Rn.144456 |
| A_42_P707937  | 0.463584 | 3.032801 | 0.006472 | -3.85378 | NM_080583    | Rn.56138  |
| A_44_P549028  | 0.462526 | 3.089647 | 0.005687 | -3.82984 | XM_001076082 | Rn.207473 |
| A_43_P17264   | 0.458705 | 2.931389 | 0.00814  | -3.89662 | XM_240329    | Rn.19314  |
| A_44_P720473  | 0.453531 | 2.941883 | 0.00795  | -3.89218 | CA512655     | Rn.24394  |
| A_44_P267155  | 0.448921 | 2.921416 | 0.008325 | -3.90084 | XM_221887    |           |
| A_44_P827752  | 0.443672 | 2.90014  | 0.008733 | -3.90984 |              |           |
| A_43_P18570   | 0.433168 | 3.293144 | 0.003564 | -3.74477 | XM_236194    | Rn.62341  |
| A_43_P21027   | 0.433031 | 2.984758 | 0.007216 | -3.87406 | XM_235023    | Rn.162943 |
| A_44_P195291  | 0.431798 | 3.387985 | 0.002861 | -3.70556 | XM_233382    | Rn.41038  |
| A_43_P23298   | 0.431665 | 3.262797 | 0.003823 | -3.75738 | XM_001079737 | Rn.161833 |
| A_44_P1005858 | 0.428954 | 2.877915 | 0.009179 | -3.91925 | CO404131     | Rn.21816  |
| A_44_P147980  | 0.42782  | 3.280565 | 0.003669 | -3.75    | XM_576503    | Rn.203950 |
| A_44_P546901  | 0.41725  | 2.967204 | 0.007509 | -3.88147 | NM_012502    | Rn.9813   |
| A_44_P304493  | 0.417047 | 3.129617 | 0.005191 | -3.81305 | NM_001024970 | Rn.213413 |
| A_43_P21762   | 0.387674 | 2.984323 | 0.007224 | -3.87424 | NM_001013187 | Rn.19440  |
| A_44_P333550  | 0.370196 | 2.879751 | 0.009141 | -3.91847 | NM_001013986 | Rn.23222  |
| A_44_P119442  | 0.36235  | 2.963593 | 0.00757  | -3.883   | XM_216492    |           |
| A_44_P277126  | 0.362131 | 2.942351 | 0.007942 | -3.89198 | XM_221369    | Rn.3336   |
| A_44_P133226  | 0.361641 | 2.994234 | 0.007063 | -3.87005 | XM_224852    | Rn.61768  |
| A_42_P601971  | 0.351093 | 3.207843 | 0.004338 | -3.78029 | XM_220328    | Rn.163114 |
| A_42_P504240  | -0.30416 | -2.95103 | 0.007788 | -3.88831 | XM_237998    | Rn.64941  |
| A_44_P637629  | -0.33755 | -2.90152 | 0.008706 | -3.90926 | DV727233     | Rn.25112  |
| A_42_P771373  | -0.35205 | -2.91754 | 0.008398 | -3.90248 | NM_012614    | Rn.9714   |
| A_44_P561760  | -0.37186 | -2.84266 | 0.009932 | -3.93418 |              |           |
| A_44_P479766  | -0.3729  | -2.93174 | 0.008134 | -3.89647 | BM986564     | Rn.90077  |
| A_44_P535706  | -0.37591 | -2.95306 | 0.007752 | -3.88745 | XM_216485    | Rn.8332   |
| A_42_P626023  | -0.381   | -3.01965 | 0.006668 | -3.85932 | XM_224232    | Rn.19524  |
| A_44_P255384  | -0.38354 | -2.87039 | 0.009335 | -3.92244 | XM_344225    |           |
| A_42_P570848  | -0.38813 | -2.9898  | 0.007135 | -3.87193 | NM_017091    | Rn.11384  |
| A_42_P791872  | -0.39568 | -2.8814  | 0.009108 | -3.91777 | XM_001061587 | Rn.160555 |
| A_44_P212695  | -0.39929 | -2.85185 | 0.00973  | -3.93029 | XM_212890    |           |
| A_42_P549321  | -0.40263 | -3.27203 | 0.003742 | -3.75355 |              |           |
| A_44_P473731  | -0.40425 | -2.87113 | 0.00932  | -3.92213 | XM_220717    | Rn.44897  |
| A_44_P762268  | -0.40531 | -3.05625 | 0.006136 | -3.84389 |              |           |
| A_44_P792063  | -0.40636 | -3.28687 | 0.003616 | -3.74738 |              |           |
| A_44_P593331  | -0.40716 | -3.09169 | 0.00566  | -3.82898 |              |           |
| A_44_P501390  | -0.41007 | -2.88437 | 0.009047 | -3.91652 | XM_001055728 | Rn.199171 |

|               |          |          |          |          |              |           |
|---------------|----------|----------|----------|----------|--------------|-----------|
| A_44_P884739  | -0.41187 | -3.14865 | 0.004969 | -3.80506 | XM_219339    | Rn.30285  |
| A_44_P1043979 | -0.41616 | -3.85418 | 0.000961 | -3.51844 | NM_001030052 | Rn.156413 |
| A_44_P161709  | -0.41899 | -3.11086 | 0.005418 | -3.82092 | XM_345662    |           |
| A_42_P634674  | -0.42025 | -2.92773 | 0.008207 | -3.89816 | NM_145783    | Rn.11077  |
| A_43_P11268   | -0.42079 | -2.98206 | 0.007261 | -3.8752  | NM_031762    | Rn.29897  |
| A_44_P525486  | -0.44011 | -2.84255 | 0.009935 | -3.93423 | XM_343841    | Rn.101173 |
| A_44_P592613  | -0.44444 | -2.92157 | 0.008322 | -3.90077 | XM_576601    | Rn.208293 |
| A_42_P703403  | -0.44803 | -3.75604 | 0.00121  | -3.55695 | NM_031974    | Rn.112599 |
| A_44_P866539  | -0.44865 | -3.35849 | 0.003064 | -3.71773 | AW913986     | Rn.40480  |
| A_44_P554867  | -0.4491  | -3.0488  | 0.006241 | -3.84703 | AW917688     | Rn.16899  |
| A_44_P792470  | -0.45652 | -3.23669 | 0.00406  | -3.76825 | DV722661     | Rn.147243 |
| A_43_P10505   | -0.45976 | -2.86522 | 0.009444 | -3.92463 | XM_226549    | Rn.19188  |
| A_44_P995316  | -0.46086 | -2.99405 | 0.007066 | -3.87013 | XM_343081    | Rn.8423   |
| A_44_P1055366 | -0.46108 | -3.07222 | 0.005917 | -3.83717 | AW919175     | Rn.18892  |
| A_44_P914323  | -0.46109 | -2.84335 | 0.009917 | -3.93389 | DV718684     | Rn.130237 |
| A_43_P16707   | -0.46278 | -2.99797 | 0.007004 | -3.86848 | NM_001004202 | Rn.7857   |
| A_44_P730454  | -0.46305 | -2.87433 | 0.009253 | -3.92077 | XM_341399    | Rn.4090   |
| A_42_P623151  | -0.46981 | -3.45868 | 0.002427 | -3.67656 | NM_031026    | Rn.31981  |
| A_44_P638345  | -0.46998 | -2.84292 | 0.009927 | -3.93408 | NM_001034130 | Rn.11866  |
| A_44_P152635  | -0.47158 | -3.14505 | 0.00501  | -3.80657 | NM_021857    | Rn.44301  |
| A_44_P822928  | -0.47162 | -3.90407 | 0.000854 | -3.49907 |              |           |
| A_44_P156922  | -0.47346 | -2.90639 | 0.008611 | -3.9072  | NM_001008312 | Rn.3775   |
| A_44_P745579  | -0.47912 | -3.23123 | 0.004111 | -3.77053 |              |           |
| A_44_P1031514 | -0.48047 | -3.09335 | 0.005639 | -3.82828 | NM_001014054 | Rn.7056   |
| A_44_P361202  | -0.48173 | -3.34691 | 0.003147 | -3.72251 | CB569688     | Rn.14868  |
| A_42_P619248  | -0.48445 | -3.09476 | 0.005621 | -3.82769 | XM_001053199 | Rn.6409   |
| A_44_P392886  | -0.48485 | -3.37934 | 0.002919 | -3.70912 | CB567353     | Rn.203235 |
| A_42_P614711  | -0.49463 | -3.3023  | 0.003489 | -3.74098 | BF548552     | Rn.163711 |
| A_42_P475623  | -0.49595 | -2.98704 | 0.007179 | -3.87309 | NM_053394    | Rn.8954   |
| A_43_P12692   | -0.49722 | -2.90714 | 0.008597 | -3.90688 | NM_031814    | Rn.34521  |
| A_44_P727480  | -0.49961 | -3.08582 | 0.005736 | -3.83145 | AW142602     | Rn.164775 |
| A_44_P976007  | -0.50124 | -2.99546 | 0.007044 | -3.86953 | DV719080     | Rn.47100  |
| A_44_P357478  | -0.50317 | -2.99207 | 0.007098 | -3.87097 | CK481254     | Rn.199106 |
| A_44_P775118  | -0.5039  | -3.42995 | 0.002595 | -3.68832 | NM_001014205 | Rn.12767  |
| A_44_P372261  | -0.50553 | -2.9543  | 0.00773  | -3.88693 | NM_053372    | Rn.18560  |
| A_44_P965429  | -0.5063  | -2.84121 | 0.009965 | -3.9348  |              |           |
| A_44_P393551  | -0.50772 | -3.02511 | 0.006586 | -3.85702 | NM_012567    | Rn.10346  |
| A_44_P700333  | -0.50776 | -3.69479 | 0.001397 | -3.58124 | CX570601     | Rn.124042 |
| A_43_P15460   | -0.50937 | -2.92906 | 0.008183 | -3.8976  | NM_053879    | Rn.10117  |
| A_44_P299247  | -0.51546 | -2.87932 | 0.00915  | -3.91866 | NM_012778    | Rn.1618   |
| A_44_P311334  | -0.51691 | -2.96234 | 0.007592 | -3.88353 | L27060       | Rn.163460 |
| A_44_P996952  | -0.51744 | -2.96827 | 0.007491 | -3.88102 | NM_001039454 | Rn.50178  |
| A_44_P373681  | -0.51761 | -2.92182 | 0.008317 | -3.90066 | BF563424     | Rn.9698   |
| A_42_P544321  | -0.52113 | -2.9674  | 0.007505 | -3.88139 | AI136185     | Rn.3287   |
| A_44_P791696  | -0.52155 | -3.32216 | 0.003333 | -3.73274 | DV725758     | Rn.49278  |
| A_44_P493603  | -0.52579 | -2.94879 | 0.007827 | -3.88926 | DY472377     | Rn.33045  |
| A_44_P270700  | -0.53738 | -3.46727 | 0.002379 | -3.67304 | BG663460     | Rn.164882 |
| A_42_P521814  | -0.53786 | -2.85913 | 0.009573 | -3.92721 |              |           |
| A_44_P640301  | -0.54291 | -3.88173 | 0.0009   | -3.50773 | XM_001065707 |           |
| A_42_P525317  | -0.54563 | -2.99904 | 0.006987 | -3.86803 | NM_053851    | Rn.10739  |
| A_44_P884444  | -0.54608 | -3.64086 | 0.001586 | -3.60278 | XM_343782    | Rn.15602  |
| A_44_P650550  | -0.55803 | -3.5501  | 0.001961 | -3.63935 | BF289404     | Rn.40468  |
| A_43_P11492   | -0.55942 | -3.43126 | 0.002587 | -3.68778 | NM_012629    | Rn.9759   |
| A_42_P839655  | -0.5619  | -3.35173 | 0.003112 | -3.72052 | BF555716     | Rn.15193  |

|               |          |          |          |          |              |           |
|---------------|----------|----------|----------|----------|--------------|-----------|
| A_44_P443657  | -0.56411 | -2.93788 | 0.008022 | -3.89387 | BI281988     | Rn.199201 |
| A_44_P655666  | -0.57623 | -3.27079 | 0.003753 | -3.75406 |              |           |
| A_42_P503281  | -0.57732 | -3.39551 | 0.002812 | -3.70247 | NM_053603    | Rn.1838   |
| A_43_P12283   | -0.57902 | -3.20147 | 0.004402 | -3.78296 | NM_022668    | Rn.9687   |
| A_44_P884766  | -0.5965  | -4.26186 | 0.000367 | -3.36441 |              |           |
| A_44_P702115  | -0.60186 | -3.32954 | 0.003276 | -3.72969 |              |           |
| A_44_P283909  | -0.60955 | -2.90764 | 0.008587 | -3.90667 | XM_216079    |           |
| A_44_P175677  | -0.6183  | -3.65131 | 0.001548 | -3.59859 | XM_001062365 | Rn.155482 |
| A_44_P386633  | -0.63065 | -2.9648  | 0.00755  | -3.88249 | NM_145785    | Rn.17383  |
| A_44_P956310  | -0.63105 | -3.11704 | 0.005342 | -3.81833 | AI171999     | Rn.4169   |
| A_42_P621736  | -0.6312  | -3.09601 | 0.005605 | -3.82716 | NM_001007604 | Rn.973    |
| A_44_P469517  | -0.63176 | -3.08126 | 0.005796 | -3.83337 | BF551572     | Rn.18432  |
| A_44_P605123  | -0.64472 | -3.07388 | 0.005895 | -3.83647 | DV716579     | Rn.164403 |
| A_44_P770724  | -0.65145 | -3.40431 | 0.002755 | -3.69885 | XM_225941    | Rn.8048   |
| A_44_P1017996 | -0.66361 | -2.97547 | 0.00737  | -3.87798 | XM_341470    | Rn.162375 |
| A_44_P350074  | -0.6662  | -3.14932 | 0.004962 | -3.80478 | XM_001075009 | Rn.202425 |
| A_44_P914438  | -0.66865 | -2.879   | 0.009157 | -3.91879 | NM_080782    | Rn.10089  |
| A_44_P593071  | -0.67445 | -3.31712 | 0.003372 | -3.73483 |              |           |
| A_42_P575140  | -0.68397 | -2.88046 | 0.009127 | -3.91817 | AW916021     | Rn.162877 |
| A_44_P652899  | -0.70319 | -3.19122 | 0.004507 | -3.78724 | NM_178105    | Rn.34370  |
| A_44_P793157  | -0.71169 | -3.10325 | 0.005513 | -3.82412 |              |           |
| A_44_P416127  | -0.71382 | -3.53588 | 0.002027 | -3.64511 | BG665128     | Rn.64518  |
| A_44_P123857  | -0.72997 | -3.04958 | 0.00623  | -3.8467  | XM_227855    |           |
| A_44_P576019  | -0.73169 | -2.88149 | 0.009106 | -3.91774 |              |           |
| A_44_P556677  | -0.74267 | -3.20897 | 0.004327 | -3.77982 | AW525326     | Rn.6795   |
| A_44_P531685  | -0.77481 | -3.42948 | 0.002598 | -3.68851 | NM_212511    | Rn.3458   |
| A_42_P484738  | -0.77772 | -2.87551 | 0.009229 | -3.92027 | NM_022266    | Rn.17145  |
| A_44_P976667  | -0.77806 | -3.4241  | 0.002631 | -3.69072 |              |           |
| A_44_P575265  | -0.78268 | -3.13828 | 0.005089 | -3.80941 | XM_001059898 |           |
| A_44_P341298  | -0.80182 | -3.62365 | 0.001651 | -3.60968 | BF396386     | Rn.172843 |
| A_44_P684912  | -0.86822 | -3.22523 | 0.004168 | -3.77303 |              |           |
| A_44_P344475  | -0.87182 | -2.98551 | 0.007204 | -3.87374 | NM_053522    | Rn.4169   |
| A_44_P608966  | -0.89897 | -3.44321 | 0.002516 | -3.68289 |              |           |
| A_42_P783113  | -0.94068 | -2.9189  | 0.008372 | -3.9019  | XM_215044    | Rn.1318   |
| A_44_P728524  | -0.94897 | -3.15801 | 0.004864 | -3.80114 | XM_218037    | Rn.176450 |
| A_44_P353618  | -1.59827 | -3.06343 | 0.006037 | -3.84087 | NM_053587    | Rn.6703   |
| A_44_P1055780 | -1.79949 | -3.46899 | 0.00237  | -3.67234 | NM_053822    | Rn.31839  |

Supplementary Table 2

| ID            | logFC    | t        | P.Value  | B        | GenbankAccession | UniGeneID |
|---------------|----------|----------|----------|----------|------------------|-----------|
| A_44_P255954  | 1.092079 | 3.230865 | 0.004114 | -2.5529  | XM_573223        | Rn.21595  |
| A_43_P16512   | 0.958391 | 3.096458 | 0.005599 | -2.7098  | XM_218824        | Rn.3618   |
| A_44_P199211  | 0.888268 | 2.998223 | 0.007    | -2.82425 | NM_001077641     | Rn.45523  |
| A_44_P519174  | 0.865479 | 3.663251 | 0.001505 | -2.05    | NM_001015027     | Rn.107553 |
| A_44_P797926  | 0.827698 | 3.314413 | 0.003393 | -2.45534 | BG673275         | Rn.199501 |
| A_44_P638014  | 0.786066 | 3.626017 | 0.001642 | -2.09301 | XM_001067431     | Rn.12385  |
| A_44_P253196  | 0.72852  | 4.218567 | 0.000407 | -1.42152 | XM_228114        | Rn.204911 |
| A_44_P817120  | 0.705276 | 4.211694 | 0.000413 | -1.42911 | BF563826         |           |
| A_44_P764308  | 0.70371  | 3.087846 | 0.00571  | -2.71985 |                  |           |
| A_44_P515211  | 0.702895 | 4.051445 | 0.000603 | -1.60766 | NM_145765        | Rn.84873  |
| A_44_P405203  | 0.692478 | 3.814967 | 0.001054 | -1.87569 | XM_218664        | Rn.106778 |
| A_44_P314492  | 0.692285 | 3.187177 | 0.004549 | -2.60392 | XM_221672        | Rn.204561 |
| A_44_P108421  | 0.689739 | 3.064999 | 0.006015 | -2.74648 | XM_224350        | Rn.100627 |
| A_44_P274573  | 0.681768 | 3.987864 | 0.000701 | -1.67923 | XM_232283        | Rn.21111  |
| A_44_P525431  | 0.678326 | 3.564303 | 0.001897 | -2.16446 |                  |           |
| A_43_P11622   | 0.670731 | 2.842532 | 0.009935 | -3.00478 | NM_012925        | Rn.1231   |
| A_44_P1050433 | 0.669816 | 2.936844 | 0.008041 | -2.89557 | XM_001078552     | Rn.47597  |
| A_43_P19994   | 0.651395 | 3.233036 | 0.004094 | -2.55036 | XM_233485        | Rn.50631  |
| A_44_P473472  | 0.649492 | 3.317094 | 0.003372 | -2.45221 | BC091233         | Rn.9497   |
| A_44_P168514  | 0.64246  | 3.565117 | 0.001894 | -2.16352 | XM_226964        | Rn.133363 |
| A_44_P377645  | 0.63785  | 3.95178  | 0.000763 | -1.72002 | XM_342774        |           |
| A_44_P300612  | 0.625149 | 2.933283 | 0.008106 | -2.89971 | NM_022850        | Rn.10076  |
| A_43_P17175   | 0.624011 | 3.800738 | 0.001089 | -1.89197 | NM_001031642     | Rn.103402 |
| A_43_P17180   | 0.623162 | 3.454849 | 0.002449 | -2.29162 | NM_001007696     | Rn.763    |
| A_44_P323430  | 0.620476 | 2.920378 | 0.008344 | -2.91468 | NM_138532        | Rn.82718  |
| A_44_P422271  | 0.600331 | 3.190954 | 0.00451  | -2.59951 | XM_217019        | Rn.99537  |
| A_44_P525645  | 0.592939 | 2.910561 | 0.008531 | -2.92606 | XM_220442        | Rn.214179 |
| A_44_P175495  | 0.59217  | 3.261685 | 0.003832 | -2.5169  | NM_182952        | Rn.13664  |
| A_44_P163242  | 0.587393 | 3.411361 | 0.00271  | -2.34227 | NM_138541        | Rn.106481 |
| A_44_P102291  | 0.58478  | 3.78593  | 0.001128 | -1.90893 | XM_341619        | Rn.47386  |
| A_43_P10020   | 0.579306 | 2.8681   | 0.009383 | -2.97523 | NM_012771        | Rn.2283   |
| A_44_P522492  | 0.577851 | 3.513423 | 0.002137 | -2.22351 | NM_133414        | Rn.26586  |
| A_44_P348973  | 0.574847 | 3.048348 | 0.006247 | -2.76589 | NM_001004277     | Rn.93631  |
| A_44_P160846  | 0.574796 | 3.871095 | 0.000923 | -1.81164 | NM_182673        | Rn.107928 |
| A_44_P1027904 | 0.574744 | 3.365231 | 0.003016 | -2.39605 | XM_213794        | Rn.41651  |
| A_44_P269425  | 0.57387  | 3.079186 | 0.005824 | -2.72994 | NM_133415        | Rn.62703  |
| A_43_P17880   | 0.572611 | 3.261621 | 0.003833 | -2.51698 | NM_182953        | Rn.18744  |
| A_44_P440633  | 0.569351 | 2.950357 | 0.0078   | -2.87989 | NM_031639        | Rn.10238  |
| A_44_P255236  | 0.561685 | 3.034627 | 0.006445 | -2.78187 | NM_019212        | Rn.82732  |
| A_44_P469113  | 0.561279 | 3.188915 | 0.004531 | -2.60189 | XM_220779        | Rn.105052 |
| A_42_P744464  | 0.559015 | 3.008124 | 0.006845 | -2.81273 | XM_340740        | Rn.98642  |
| A_44_P247219  | 0.558874 | 3.723233 | 0.001307 | -1.9809  | NM_053699        | Rn.40380  |
| A_42_P453976  | 0.554018 | 3.971332 | 0.000729 | -1.6979  | XM_219476        | Rn.136568 |
| A_44_P191022  | 0.553331 | 3.031764 | 0.006487 | -2.78521 | NM_053674        | Rn.7279   |
| A_44_P492629  | 0.552641 | 3.351295 | 0.003115 | -2.4123  | DV727624         | Rn.203850 |
| A_43_P10824   | 0.546754 | 3.722453 | 0.00131  | -1.9818  | NM_001015010     | Rn.46320  |
| A_43_P18186   | 0.539919 | 2.926248 | 0.008235 | -2.90787 | XM_232226        | Rn.3111   |
| A_44_P408520  | 0.539577 | 3.024085 | 0.006601 | -2.79415 | NM_031569        | Rn.9762   |
| A_44_P189813  | 0.539428 | 3.045752 | 0.006284 | -2.76891 | XM_214295        | Rn.105830 |
| A_44_P150471  | 0.535326 | 2.924382 | 0.00827  | -2.91003 | NM_031696        | Rn.59513  |
| A_43_P12802   | 0.5329   | 3.719108 | 0.00132  | -1.98564 | NM_053418        | Rn.11946  |
| A_44_P445369  | 0.532457 | 3.217287 | 0.004245 | -2.56875 | XM_001080476     | Rn.178658 |
| A_44_P114184  | 0.525917 | 3.306995 | 0.003452 | -2.464   | NM_022543        | Rn.2193   |
| A_44_P134634  | 0.519467 | 2.897277 | 0.008789 | -2.94145 | CB576476         | Rn.14073  |
| A_44_P309523  | 0.516512 | 2.96465  | 0.007552 | -2.86328 | XM_001076269     | Rn.196791 |
| A_44_P273449  | 0.514881 | 2.929609 | 0.008173 | -2.90397 | XM_214953        | Rn.101762 |

|               |          |          |          |          |              |           |
|---------------|----------|----------|----------|----------|--------------|-----------|
| A_44_P823303  | 0.512983 | 3.234316 | 0.004082 | -2.54887 |              |           |
| A_44_P729266  | 0.503142 | 3.733255 | 0.001277 | -1.96938 | XR_005718    | Rn.216190 |
| A_43_P18294   | 0.500507 | 3.256681 | 0.003877 | -2.52275 | BC099835     | Rn.134218 |
| A_44_P314353  | 0.499854 | 2.919057 | 0.008369 | -2.91621 | NM_001037765 | Rn.144447 |
| A_44_P288241  | 0.496253 | 3.022922 | 0.006619 | -2.7955  | XM_341029    | Rn.14770  |
| A_44_P167408  | 0.492468 | 2.942735 | 0.007935 | -2.88874 | AW144014     | Rn.13589  |
| A_44_P229051  | 0.492248 | 3.13049  | 0.00518  | -2.67009 | NM_012748    | Rn.10623  |
| A_44_P668388  | 0.490809 | 3.228828 | 0.004134 | -2.55528 | BC098022     | Rn.117989 |
| A_44_P408108  | 0.475979 | 2.910473 | 0.008532 | -2.92616 | XM_236649    | Rn.73847  |
| A_44_P189953  | 0.471873 | 2.92019  | 0.008348 | -2.9149  | NM_031769    | Rn.18815  |
| A_44_P549028  | 0.471493 | 3.14955  | 0.004959 | -2.64785 | XM_001076082 | Rn.207473 |
| A_42_P839541  | 0.466727 | 2.906207 | 0.008615 | -2.93111 | NM_001007671 | Rn.144924 |
| A_44_P252756  | 0.466033 | 2.919283 | 0.008365 | -2.91595 | XM_221874    | Rn.6774   |
| A_44_P655158  | 0.462016 | 3.331279 | 0.003263 | -2.43566 | CO567276     | Rn.203592 |
| A_44_P426624  | 0.46039  | 3.393368 | 0.002826 | -2.36324 | XM_344380    |           |
| A_43_P23215   | 0.456773 | 3.575282 | 0.001849 | -2.15174 | NM_001025737 | Rn.205854 |
| A_44_P299123  | 0.452931 | 3.005041 | 0.006893 | -2.81632 | XM_215847    | Rn.162718 |
| A_44_P456747  | 0.438792 | 3.137424 | 0.005099 | -2.662   | AB012231     | Rn.40435  |
| A_44_P237220  | 0.438141 | 3.246938 | 0.003965 | -2.53413 | XM_214720    | Rn.98912  |
| A_44_P148280  | 0.437942 | 2.943752 | 0.007917 | -2.88756 | NM_053670    | Rn.9449   |
| A_43_P10534   | 0.434336 | 3.152137 | 0.00493  | -2.64483 | NM_001034108 | Rn.145219 |
| A_44_P332817  | 0.430724 | 2.920255 | 0.008347 | -2.91482 | NM_053527    | Rn.54977  |
| A_43_P20794   | 0.418891 | 2.940595 | 0.007973 | -2.89122 | BC091326     | Rn.140527 |
| A_44_P483177  | 0.416901 | 3.015735 | 0.006728 | -2.80387 | NM_001009344 | Rn.129282 |
| A_43_P19369   | 0.414985 | 2.928171 | 0.008199 | -2.90564 | XM_219805    | Rn.204724 |
| A_44_P545649  | 0.410999 | 3.632987 | 0.001615 | -2.08495 | NM_001014093 | Rn.23423  |
| A_44_P111825  | 0.410741 | 3.00833  | 0.006841 | -2.81249 | NM_001014144 | Rn.16893  |
| A_44_P1051765 | 0.405347 | 3.10861  | 0.005446 | -2.69563 | XM_342984    | Rn.14849  |
| A_44_P109834  | 0.401496 | 3.050681 | 0.006214 | -2.76317 | XM_341783    | Rn.100654 |
| A_44_P809514  | 0.398808 | 3.321156 | 0.00334  | -2.44747 |              |           |
| A_44_P1038400 | 0.394146 | 3.141451 | 0.005052 | -2.6573  | DV727624     | Rn.203850 |
| A_43_P10315   | 0.393843 | 2.843644 | 0.009911 | -3.00349 | XM_341626    | Rn.203753 |
| A_44_P289173  | 0.390852 | 2.982177 | 0.007259 | -2.84291 | BC097985     | Rn.19589  |
| A_44_P187300  | 0.390448 | 2.923616 | 0.008284 | -2.91092 | XM_344202    |           |
| A_44_P228903  | 0.389952 | 3.779544 | 0.001145 | -1.91625 | NM_078621    | Rn.212750 |
| A_44_P532500  | 0.387401 | 2.920154 | 0.008349 | -2.91494 | XM_217354    | Rn.207855 |
| A_43_P12267   | 0.380794 | 3.335712 | 0.00323  | -2.43048 | NM_022623    | Rn.48736  |
| A_44_P424069  | 0.380306 | 3.0621   | 0.006055 | -2.74986 | XM_218463    | Rn.213001 |
| A_44_P370082  | 0.379629 | 3.098258 | 0.005576 | -2.7077  | XM_340856    | Rn.41817  |
| A_43_P15129   | 0.377676 | 2.871891 | 0.009304 | -2.97084 | BF558849     |           |
| A_44_P349817  | 0.373434 | 3.021743 | 0.006636 | -2.79688 | XM_237215    | Rn.214104 |
| A_44_P1010416 | 0.365499 | 3.311583 | 0.003415 | -2.45865 | NM_001002853 | Rn.209780 |
| A_44_P447927  | 0.362439 | 3.235128 | 0.004074 | -2.54792 |              |           |
| A_44_P356482  | 0.359146 | 2.933233 | 0.008106 | -2.89977 |              |           |
| A_44_P119442  | 0.353803 | 2.89369  | 0.00886  | -2.94561 | XM_216492    |           |
| A_44_P409539  | 0.350217 | 3.19752  | 0.004442 | -2.59184 | NM_175869    | Rn.12945  |
| A_44_P407800  | 0.350096 | 3.595319 | 0.001764 | -2.12853 | XM_225607    | Rn.124742 |
| A_43_P17282   | 0.349379 | 2.962993 | 0.00758  | -2.86521 | XM_219879    | Rn.87733  |
| A_42_P809101  | 0.345238 | 3.124555 | 0.005251 | -2.67702 | XM_342873    | Rn.206137 |
| A_44_P468816  | 0.340427 | 2.907558 | 0.008588 | -2.92954 | XM_001057103 | Rn.7936   |
| A_42_P601971  | 0.333952 | 3.051229 | 0.006207 | -2.76253 | XM_220328    | Rn.163114 |
| A_44_P398433  | 0.328459 | 2.88229  | 0.00909  | -2.95881 | XM_224923    | Rn.206107 |
| A_44_P156846  | 0.326852 | 2.843101 | 0.009923 | -3.00412 | XM_231139    | Rn.211738 |
| A_44_P370774  | 0.321406 | 2.997523 | 0.007011 | -2.82506 | XM_235183    | Rn.161928 |
| A_44_P260384  | 0.313235 | 2.936879 | 0.00804  | -2.89553 | XM_240915    | Rn.64258  |
| A_44_P388709  | 0.279068 | 2.946045 | 0.007876 | -2.88489 | NM_145767    | Rn.10189  |
| A_44_P591036  | -0.31221 | -2.92133 | 0.008327 | -2.91357 | XM_001069503 |           |
| A_43_P11492   | -0.34147 | -3.03134 | 0.006493 | -2.7857  | NM_012629    | Rn.9759   |

|               |          |          |          |          |              |           |
|---------------|----------|----------|----------|----------|--------------|-----------|
| A_44_P229557  | -0.34405 | -2.89908 | 0.008754 | -2.93937 | XM_230513    | Rn.17049  |
| A_44_P518050  | -0.36419 | -3.22135 | 0.004205 | -2.564   | XM_223566    | Rn.24287  |
| A_44_P184865  | -0.37731 | -2.9579  | 0.007668 | -2.87112 | NM_031579    | Rn.9459   |
| A_44_P1002407 | -0.38311 | -2.86879 | 0.009369 | -2.97442 | AI137378     | Rn.166773 |
| A_44_P334736  | -0.38814 | -3.37101 | 0.002976 | -2.3893  | NM_012548    | Rn.10918  |
| A_44_P839802  | -0.38948 | -2.91023 | 0.008537 | -2.92644 |              |           |
| A_44_P307646  | -0.39544 | -2.96136 | 0.007608 | -2.86711 | BI289723     | Rn.162620 |
| A_44_P420046  | -0.40913 | -2.88381 | 0.009059 | -2.95705 | NM_021669    | Rn.42103  |
| A_42_P736812  | -0.41247 | -3.15582 | 0.004888 | -2.64052 | NM_134449    | Rn.12281  |
| A_44_P777113  | -0.4134  | -2.91736 | 0.008401 | -2.91818 | XM_001068152 |           |
| A_42_P840867  | -0.41639 | -3.13684 | 0.005105 | -2.66268 | XR_008037    | Rn.3743   |
| A_44_P597013  | -0.42295 | -3.01657 | 0.006715 | -2.8029  |              |           |
| A_44_P288443  | -0.42363 | -3.19774 | 0.00444  | -2.59158 | XM_344542    | Rn.100687 |
| A_43_P13326   | -0.42534 | -3.27468 | 0.003719 | -2.50173 | NM_138894    | Rn.82758  |
| A_44_P110334  | -0.42702 | -3.23471 | 0.004078 | -2.54841 | XM_236387    | Rn.162988 |
| A_43_P23304   | -0.42939 | -3.2285  | 0.004137 | -2.55566 | NM_199397    | Rn.204521 |
| A_44_P428338  | -0.43776 | -3.84422 | 0.000983 | -1.84228 | AA817984     | Rn.98260  |
| A_44_P1050510 | -0.44061 | -2.94931 | 0.007818 | -2.88111 | XM_001075804 |           |
| A_44_P127962  | -0.44219 | -3.06498 | 0.006015 | -2.74651 | NM_181771    | Rn.56673  |
| A_44_P379645  | -0.45022 | -3.15771 | 0.004867 | -2.63832 | AF030090     | Rn.202876 |
| A_44_P578593  | -0.4523  | -3.18672 | 0.004554 | -2.60444 |              |           |
| A_43_P18201   | -0.45248 | -2.98747 | 0.007172 | -2.83676 | XM_230639    | Rn.104639 |
| A_44_P283372  | -0.45264 | -3.16559 | 0.00478  | -2.62912 | BC062235     | Rn.25771  |
| A_44_P960490  | -0.4539  | -3.13199 | 0.005162 | -2.66835 | XM_573497    | Rn.138943 |
| A_44_P171321  | -0.46049 | -3.24816 | 0.003954 | -2.5327  | NM_001009671 | Rn.101706 |
| A_42_P737455  | -0.46356 | -3.21374 | 0.00428  | -2.57289 | AI071866     | Rn.166480 |
| A_44_P182739  | -0.46677 | -2.87175 | 0.009307 | -2.971   | XM_217651    | Rn.43772  |
| A_44_P853624  | -0.46843 | -3.06352 | 0.006035 | -2.74821 | XM_237855    | Rn.29452  |
| A_44_P650550  | -0.47547 | -3.02484 | 0.00659  | -2.79327 | BF289404     | Rn.40468  |
| A_44_P745585  | -0.48381 | -2.88277 | 0.00908  | -2.95826 | NM_001024309 | Rn.116819 |
| A_44_P376411  | -0.4896  | -2.94663 | 0.007865 | -2.88422 | BF548067     | Rn.164650 |
| A_44_P885461  | -0.49151 | -3.51716 | 0.002118 | -2.21918 |              |           |
| A_44_P976153  | -0.49246 | -3.50989 | 0.002154 | -2.22761 |              |           |
| A_44_P792746  | -0.49464 | -3.25277 | 0.003912 | -2.52731 |              |           |
| A_43_P14760   | -0.49524 | -3.02068 | 0.006653 | -2.79812 |              |           |
| A_44_P578847  | -0.49731 | -3.06915 | 0.005959 | -2.74165 |              |           |
| A_44_P1031380 | -0.49908 | -2.85054 | 0.009759 | -2.99552 | XM_001077462 | Rn.10092  |
| A_44_P808218  | -0.49984 | -3.02304 | 0.006617 | -2.79537 | XM_233470    | Rn.33652  |
| A_44_P278659  | -0.50967 | -3.63278 | 0.001616 | -2.08519 | AJ517196     | Rn.30616  |
| A_44_P988767  | -0.51023 | -3.16631 | 0.004772 | -2.62829 | BF564195     | Rn.10251  |
| A_42_P475623  | -0.51931 | -3.12774 | 0.005213 | -2.67331 | NM_053394    | Rn.8954   |
| A_44_P653818  | -0.5195  | -3.42999 | 0.002595 | -2.32057 |              |           |
| A_44_P254238  | -0.51954 | -3.07077 | 0.005937 | -2.73976 | NM_001033670 | Rn.10323  |
| A_44_P635089  | -0.5201  | -3.98677 | 0.000703 | -1.68046 | AI030078     | Rn.165903 |
| A_44_P724632  | -0.52274 | -3.03083 | 0.006501 | -2.78629 | AI176008     |           |
| A_44_P1026631 | -0.52356 | -2.91813 | 0.008387 | -2.91729 | XM_573823    | Rn.10557  |
| A_44_P840348  | -0.53073 | -2.91847 | 0.00838  | -2.91689 |              |           |
| A_44_P559242  | -0.53267 | -3.18308 | 0.004592 | -2.6087  | XM_001065920 | Rn.40465  |
| A_42_P570848  | -0.54445 | -4.19397 | 0.000431 | -1.44873 | NM_017091    | Rn.11384  |
| A_44_P175677  | -0.5551  | -3.2781  | 0.00369  | -2.49774 | XM_001062365 | Rn.155482 |
| A_42_P788810  | -0.56244 | -2.88838 | 0.008966 | -2.95176 | AW918709     | Rn.203224 |
| A_44_P837846  | -0.57464 | -3.10858 | 0.005446 | -2.69565 | DV723320     | Rn.106829 |
| A_44_P895064  | -0.57601 | -2.89321 | 0.00887  | -2.94617 | XM_341290    | Rn.140732 |
| A_44_P570046  | -0.57765 | -2.98033 | 0.007289 | -2.84505 | XM_001067059 | Rn.201930 |
| A_42_P502759  | -0.58777 | -3.09092 | 0.00567  | -2.71626 | XM_343513    | Rn.1423   |
| A_44_P249774  | -0.59498 | -2.84342 | 0.009915 | -3.00375 | BG668003     | Rn.201724 |
| A_44_P731912  | -0.60161 | -3.01    | 0.006816 | -2.81054 |              |           |
| A_42_P638620  | -0.60852 | -3.33924 | 0.003204 | -2.42637 | NM_130741    | Rn.11303  |

|               |          |          |          |          |              |           |
|---------------|----------|----------|----------|----------|--------------|-----------|
| A_44_P181718  | -0.61556 | -3.35125 | 0.003116 | -2.41235 | BI285476     | Rn.6870   |
| A_44_P521587  | -0.61685 | -3.84583 | 0.00098  | -1.84043 | XM_224588    | Rn.11687  |
| A_44_P374708  | -0.61932 | -2.91216 | 0.0085   | -2.92421 | NM_198750    | Rn.43646  |
| A_44_P962074  | -0.63275 | -3.03238 | 0.006478 | -2.78449 |              |           |
| A_44_P551872  | -0.63783 | -2.84708 | 0.009835 | -2.99952 | AI555745     | Rn.17145  |
| A_42_P556083  | -0.64137 | -2.87961 | 0.009144 | -2.96191 | NM_013165    | Rn.90997  |
| A_44_P492624  | -0.64313 | -4.21612 | 0.000409 | -1.42422 | XM_340867    |           |
| A_44_P472989  | -0.64342 | -3.30579 | 0.003461 | -2.46541 | NM_017232    | Rn.44369  |
| A_44_P199107  | -0.65155 | -3.33422 | 0.003241 | -2.43223 | XM_345241    |           |
| A_44_P341298  | -0.65452 | -2.95796 | 0.007667 | -2.87105 | BF396386     | Rn.172843 |
| A_43_P12535   | -0.65537 | -2.8748  | 0.009243 | -2.96747 | NM_031135    | Rn.2398   |
| A_43_P14919   | -0.66064 | -3.51746 | 0.002117 | -2.21883 | NM_019372    | Rn.31799  |
| A_43_P12283   | -0.66706 | -3.68827 | 0.001419 | -2.02115 | NM_022668    | Rn.9687   |
| A_44_P776423  | -0.67176 | -3.64281 | 0.001579 | -2.07361 | NM_001017386 | Rn.25053  |
| A_44_P559239  | -0.6929  | -3.16442 | 0.004793 | -2.63049 | AW921223     | Rn.40465  |
| A_44_P1034541 | -0.69456 | -3.66028 | 0.001515 | -2.05343 | NM_022602    | Rn.6343   |
| A_44_P254130  | -0.70132 | -4.05855 | 0.000593 | -1.59969 | AA875032     |           |
| A_44_P337351  | -0.70754 | -4.29411 | 0.00034  | -1.33838 | NM_001033883 | Rn.54439  |
| A_44_P593071  | -0.70957 | -3.48989 | 0.002257 | -2.25086 |              |           |
| A_44_P221885  | -0.71164 | -3.13697 | 0.005104 | -2.66253 | BF565038     | Rn.156229 |
| A_44_P589346  | -0.72373 | -3.25028 | 0.003934 | -2.53022 | DY471743     | Rn.11709  |
| A_42_P762508  | -0.75728 | -3.89528 | 0.000872 | -1.78412 | NM_001034199 | Rn.162101 |
| A_44_P670185  | -0.75886 | -3.50289 | 0.00219  | -2.23575 |              |           |
| A_44_P823528  | -0.76063 | -4.08677 | 0.000555 | -1.56807 |              |           |
| A_42_P681722  | -0.76759 | -3.7704  | 0.00117  | -1.92673 | BF554576     | Rn.165233 |
| A_44_P870183  | -0.77114 | -2.95087 | 0.007791 | -2.87929 |              |           |
| A_42_P739860  | -0.77204 | -3.06879 | 0.005963 | -2.74206 | NM_133578    | Rn.10877  |
| A_44_P914438  | -0.77853 | -3.35211 | 0.003109 | -2.41135 | NM_080782    | Rn.10089  |
| A_44_P219026  | -0.78547 | -3.50001 | 0.002205 | -2.2391  | NM_012513    | Rn.11266  |
| A_44_P732510  | -0.80447 | -2.92646 | 0.008231 | -2.90762 | DV722942     | Rn.173292 |
| A_44_P307971  | -0.82442 | -3.16637 | 0.004772 | -2.62821 | L04739       |           |
| A_44_P807565  | -0.83069 | -3.50917 | 0.002158 | -2.22845 |              |           |
| A_44_P1029253 | -0.91482 | -3.372   | 0.002969 | -2.38815 | NM_012757    | Rn.21943  |
| A_44_P378959  | -0.93302 | -6.04924 | 5.98E-06 | 0.369974 | AA859348     |           |
| A_44_P763434  | -0.94522 | -3.10133 | 0.005537 | -2.70412 | XM_576579    | Rn.141605 |
| A_44_P437896  | -0.95369 | -5.74915 | 1.17E-05 | 0.110652 | NM_012513    | Rn.11266  |
| A_44_P303430  | -0.96464 | -6.09195 | 5.44E-06 | 0.405763 | AW142654     |           |
| A_44_P916210  | -0.99037 | -3.72701 | 0.001296 | -1.97655 |              |           |
| A_44_P522524  | -0.9989  | -4.12394 | 0.000509 | -1.52655 | NM_019328    | Rn.88129  |
| A_44_P931389  | -1.00677 | -3.38108 | 0.002907 | -2.37757 | CA509267     | Rn.179170 |
| A_44_P1032732 | -1.01013 | -3.01546 | 0.006732 | -2.80419 | NM_031740    | Rn.21126  |
| A_42_P839593  | -1.01732 | -3.45972 | 0.002422 | -2.28595 | AW142999     | Rn.35842  |
| A_44_P424723  | -1.05196 | -3.08651 | 0.005727 | -2.7214  | NM_021693    | Rn.42905  |
| A_42_P484738  | -1.14331 | -4.22725 | 0.000399 | -1.41193 | NM_022266    | Rn.17145  |
| A_44_P512806  | -1.18274 | -3.94126 | 0.000782 | -1.73193 | NM_153626    | Rn.86654  |
| A_44_P654444  | -1.18541 | -5.88852 | 8.56E-06 | 0.232804 | DQ268830     | Rn.62694  |
| A_44_P365379  | -1.25143 | -3.85157 | 0.000967 | -1.83389 | NM_001077640 | Rn.16950  |
| A_42_P594613  | -1.2986  | -4.31822 | 0.000322 | -1.31199 | NM_053883    | Rn.4313   |
| A_42_P540950  | -1.31126 | -3.1894  | 0.004526 | -2.60132 | NM_001009541 | Rn.4298   |
| A_44_P233080  | -1.32317 | -4.82589 | 9.76E-05 | -0.77345 | NM_012551    | Rn.9096   |
| A_44_P701809  | -1.3923  | -4.12159 | 0.000511 | -1.52918 |              |           |
| A_44_P591857  | -1.3938  | -4.08569 | 0.000557 | -1.56928 |              |           |
| A_42_P708068  | -1.41456 | -5.09071 | 5.27E-05 | -0.50674 | NM_019137    | Rn.31998  |
| A_44_P560710  | -1.44987 | -4.27919 | 0.000353 | -1.35475 |              |           |
| A_44_P495480  | -1.50825 | -3.6907  | 0.001411 | -2.01835 | NM_022197    | Rn.103750 |
| A_43_P12619   | -1.58827 | -4.16732 | 0.000459 | -1.47828 | NM_031628    | Rn.62694  |
| A_44_P212803  | -1.61214 | -3.42414 | 0.002631 | -2.32738 | AF050659     | Rn.202875 |
| A_43_P12125   | -1.61511 | -3.31149 | 0.003416 | -2.45876 | NM_021836    | Rn.15806  |



|              |          |          |          |          |           |          |
|--------------|----------|----------|----------|----------|-----------|----------|
| A_44_P218896 | -1.65862 | -3.03286 | 0.006471 | -2.78393 | NM_031327 | Rn.22129 |
| A_44_P398142 | -1.69025 | -3.50522 | 0.002178 | -2.23305 | NM_017259 | Rn.27923 |
| A_44_P380835 | -1.72043 | -5.81913 | 1.00E-05 | 0.172355 | AB003726  | Rn.37500 |
| A_44_P839581 | -1.75977 | -4.10076 | 0.000537 | -1.55243 |           |          |
| A_42_P682589 | -1.88194 | -4.39681 | 0.000267 | -1.22644 | NM_024388 | Rn.10000 |
| A_43_P11932  | -2.06197 | -4.10425 | 0.000533 | -1.54854 | NM_017352 | Rn.62694 |
| A_42_P750683 | -2.09602 | -3.96396 | 0.000742 | -1.70624 | NM_031327 | Rn.22129 |
| A_44_P118724 | -2.15949 | -5.13461 | 4.76E-05 | -0.46353 | NM_019361 | Rn.10086 |
| A_42_P473594 | -2.43313 | -6.27434 | 3.64E-06 | 0.555501 | NM_053633 | Rn.89235 |

Supplementary Table 3

| ID            | logFC    | t        | P.Value  | B        | GenbankAccession | UniGeneID |
|---------------|----------|----------|----------|----------|------------------|-----------|
| A_44_P839581  | 1.478474 | 3.445262 | 0.002504 | -1.44321 |                  |           |
| A_44_P157527  | 1.190031 | 3.95436  | 0.000759 | -0.44392 | BF285469         | Rn.45224  |
| A_44_P535706  | 1.064651 | 2.904313 | 0.008651 | -2.47862 | XM_216485        | Rn.8332   |
| A_42_P525886  | 1.056686 | 3.238891 | 0.004039 | -1.84319 | XM_236253        | Rn.3207   |
| A_44_P262625  | 0.984094 | 3.37229  | 0.002967 | -1.58517 | XM_344424        |           |
| A_44_P217250  | 0.951383 | 3.060295 | 0.00608  | -2.18482 | NM_012949        | Rn.3443   |
| A_44_P478637  | 0.946374 | 4.507965 | 0.000206 | 0.641561 | BI274236         | Rn.161389 |
| A_42_P679251  | 0.920972 | 3.361842 | 0.00304  | -1.60545 | NM_031503        | Rn.10486  |
| A_44_P931389  | 0.919886 | 3.089285 | 0.005691 | -2.12971 | CA509267         | Rn.179170 |
| A_44_P913689  | 0.915771 | 3.324394 | 0.003316 | -1.67805 |                  |           |
| A_43_P16887   | 0.914468 | 3.027699 | 0.006547 | -2.2466  | XM_215059        | Rn.136569 |
| A_44_P479890  | 0.912017 | 3.880277 | 0.000903 | -0.5898  | NM_153821        | Rn.203584 |
| A_42_P793008  | 0.908714 | 2.954982 | 0.007719 | -2.38371 | NM_130432        | Rn.198625 |
| A_44_P231657  | 0.907535 | 3.86021  | 0.000947 | -0.62931 | XM_341779        | Rn.140257 |
| A_43_P14752   | 0.898158 | 4.12512  | 0.000507 | -0.10785 | XM_001073940     | Rn.9542   |
| A_44_P236566  | 0.897017 | 3.861663 | 0.000944 | -0.62644 | XM_230848        | Rn.98792  |
| A_44_P671992  | 0.894022 | 5.227009 | 3.85E-05 | 2.015107 | XM_575387        | Rn.208326 |
| A_43_P16949   | 0.846619 | 3.038804 | 0.006384 | -2.22557 | XM_220884        | Rn.136653 |
| A_43_P11563   | 0.835843 | 4.47932  | 0.00022  | 0.585794 | NM_012784        | Rn.89774  |
| A_44_P685508  | 0.821372 | 3.105956 | 0.005479 | -2.09796 |                  |           |
| A_44_P743576  | 0.820139 | 3.633806 | 0.001612 | -1.07444 | AW917533         | Rn.2295   |
| A_44_P1009948 | 0.806853 | 3.521605 | 0.002096 | -1.29419 | XM_220532        | Rn.21630  |
| A_44_P252855  | 0.803766 | 4.172639 | 0.000453 | -0.01445 |                  |           |
| A_44_P853254  | 0.800247 | 3.10884  | 0.005443 | -2.09246 |                  |           |
| A_44_P197290  | 0.792545 | 3.741201 | 0.001253 | -0.86348 | NM_021760        | Rn.38654  |
| A_44_P588759  | 0.792232 | 4.302654 | 0.000334 | 0.240641 | BF563670         | Rn.147739 |
| A_44_P543813  | 0.776085 | 3.112261 | 0.005401 | -2.08593 | XM_228345        | Rn.24209  |
| A_44_P974651  | 0.774859 | 4.080057 | 0.000564 | -0.19648 | XM_575260        | Rn.141393 |
| A_42_P635881  | 0.773147 | 4.161272 | 0.000466 | -0.03679 | NM_031782        | Rn.10846  |
| A_44_P558838  | 0.769348 | 2.98332  | 0.00724  | -2.3304  | BF417038         | Rn.137099 |
| A_44_P413324  | 0.763004 | 3.092474 | 0.00565  | -2.12364 | BF558477         | Rn.166297 |
| A_44_P307308  | 0.761818 | 2.908038 | 0.008579 | -2.47166 | XM_237568        |           |
| A_43_P11044   | 0.760943 | 3.30244  | 0.003488 | -1.72054 | NM_001009632     | Rn.1040   |
| A_44_P409913  | 0.750951 | 2.925367 | 0.008251 | -2.43925 | XM_341043        |           |
| A_44_P685354  | 0.747361 | 3.567133 | 0.001885 | -1.20512 |                  |           |
| A_42_P596942  | 0.746022 | 4.901028 | 8.19E-05 | 1.399454 | NM_145682        | Rn.44931  |
| A_42_P568943  | 0.738116 | 2.940044 | 0.007983 | -2.41175 | XM_217167        | Rn.163007 |
| A_44_P592800  | 0.732669 | 3.730891 | 0.001284 | -0.88376 |                  |           |
| A_44_P233786  | 0.73062  | 3.470434 | 0.002362 | -1.39413 | NM_030997        | Rn.9704   |
| A_44_P461587  | 0.727787 | 4.048997 | 0.000607 | -0.2576  | XM_341847        | Rn.82375  |
| A_44_P808072  | 0.727337 | 2.977696 | 0.007333 | -2.341   |                  |           |
| A_43_P11082   | 0.723487 | 3.362518 | 0.003035 | -1.60414 |                  |           |
| A_44_P304759  | 0.722884 | 3.252704 | 0.003913 | -1.81658 | XR_007322        | Rn.196027 |
| A_44_P670185  | 0.715761 | 3.303958 | 0.003476 | -1.7176  |                  |           |
| A_42_P814235  | 0.715392 | 2.859275 | 0.00957  | -2.56252 | NM_057124        | Rn.10671  |
| A_44_P848951  | 0.708819 | 3.488979 | 0.002262 | -1.35794 | AW915522         | Rn.128940 |
| A_44_P222447  | 0.706019 | 3.233068 | 0.004094 | -1.85441 | CF979076         | Rn.101945 |
| A_44_P319238  | 0.705051 | 3.356706 | 0.003076 | -1.61542 | XM_345977        | Rn.124862 |
| A_44_P589674  | 0.702823 | 3.376922 | 0.002936 | -1.57618 | AI406628         | Rn.170660 |
| A_44_P394279  | 0.701716 | 2.905192 | 0.008634 | -2.47698 | XM_001081777     | Rn.143966 |
| A_43_P19039   | 0.699688 | 3.834718 | 0.001006 | -0.67949 | XM_342487        | Rn.18453  |
| A_44_P1014527 | 0.698386 | 2.986488 | 0.007188 | -2.32443 | XM_216189        | Rn.211939 |
| A_44_P1000100 | 0.69182  | 4.700938 | 0.000131 | 1.015486 | XM_215666        | Rn.102590 |
| A_44_P117216  | 0.691555 | 3.204203 | 0.004375 | -1.90992 | NM_001025007     | Rn.159189 |
| A_44_P559239  | 0.69093  | 3.15544  | 0.004893 | -2.00343 | AW921223         | Rn.40465  |
| A_44_P620208  | 0.688642 | 3.710377 | 0.001347 | -0.92408 | BF549419         | Rn.204134 |

|               |          |          |          |          |              |           |
|---------------|----------|----------|----------|----------|--------------|-----------|
| A_44_P868418  | 0.683253 | 3.43641  | 0.002557 | -1.46046 | AI043758     | Rn.165978 |
| A_44_P748361  | 0.683244 | 2.875105 | 0.009237 | -2.53308 |              |           |
| A_42_P797638  | 0.677852 | 3.672912 | 0.001471 | -0.99768 | XM_341839    | Rn.137669 |
| A_43_P12401   | 0.677561 | 3.051365 | 0.006205 | -2.20176 | NM_024142    | Rn.160717 |
| A_42_P596050  | 0.674306 | 3.148338 | 0.004973 | -2.01702 | NM_053572    | Rn.19780  |
| A_44_P435158  | 0.674159 | 3.198819 | 0.004429 | -1.92026 | AW917664     |           |
| A_44_P930681  | 0.673171 | 3.264009 | 0.003812 | -1.79478 | DV723298     | Rn.96324  |
| A_44_P882551  | 0.671501 | 2.962127 | 0.007595 | -2.37029 | XM_001072622 | Rn.12980  |
| A_42_P782490  | 0.669773 | 3.097574 | 0.005585 | -2.11393 | XM_226464    | Rn.204355 |
| A_44_P640931  | 0.668623 | 3.788517 | 0.001121 | -0.77042 |              |           |
| A_44_P1049275 | 0.666814 | 2.858297 | 0.009591 | -2.56433 | DQ889715     | Rn.9039   |
| A_44_P272253  | 0.66654  | 3.546667 | 0.001977 | -1.24518 | XM_213864    | Rn.32209  |
| A_44_P507773  | 0.661387 | 2.842171 | 0.009943 | -2.59426 | BG663014     | Rn.8166   |
| A_44_P971665  | 0.659826 | 3.270928 | 0.003752 | -1.78143 | AW916050     | Rn.1821   |
| A_43_P11476   | 0.656787 | 3.243832 | 0.003993 | -1.83368 | NM_012590    | Rn.8831   |
| A_44_P668572  | 0.65317  | 3.27028  | 0.003757 | -1.78268 |              |           |
| A_44_P900576  | 0.653048 | 3.045666 | 0.006286 | -2.21257 |              |           |
| A_44_P996952  | 0.653002 | 3.745901 | 0.001239 | -0.85424 | NM_001039454 | Rn.50178  |
| A_44_P376112  | 0.652891 | 3.074973 | 0.00588  | -2.15693 | X72758       |           |
| A_44_P178503  | 0.652686 | 2.946974 | 0.007859 | -2.39875 | XM_221452    | Rn.140653 |
| A_44_P1034937 | 0.650992 | 3.03071  | 0.006503 | -2.2409  | NM_001011966 | Rn.20043  |
| A_44_P296473  | 0.648189 | 3.262342 | 0.003827 | -1.79799 | AI013718     |           |
| A_44_P623694  | 0.648094 | 3.324128 | 0.003318 | -1.67857 | XM_001067023 | Rn.153703 |
| A_44_P358028  | 0.646793 | 2.843403 | 0.009916 | -2.59198 | CO569648     | Rn.199091 |
| A_44_P179338  | 0.646712 | 2.955214 | 0.007715 | -2.38328 | AI603168     | Rn.3391   |
| A_42_P740209  | 0.643911 | 4.146421 | 0.000482 | -0.06598 | NM_012601    | Rn.11241  |
| A_44_P669323  | 0.641396 | 3.324258 | 0.003317 | -1.67832 |              |           |
| A_44_P500295  | 0.639834 | 3.132836 | 0.005152 | -2.04666 | BI274118     | Rn.11495  |
| A_42_P619403  | 0.638018 | 3.591535 | 0.00178  | -1.15732 | XM_341720    | Rn.66325  |
| A_44_P316898  | 0.636016 | 3.520201 | 0.002103 | -1.29694 | XM_213488    | Rn.38891  |
| A_44_P324906  | 0.635202 | 3.198998 | 0.004427 | -1.91992 | AW142380     | Rn.161942 |
| A_43_P11634   | 0.633438 | 3.160983 | 0.004831 | -1.99282 | NM_012959    | Rn.88489  |
| A_44_P753353  | 0.633317 | 2.936406 | 0.008049 | -2.41857 | CO401859     | Rn.203889 |
| A_44_P464065  | 0.632653 | 2.922288 | 0.008309 | -2.44501 | NM_001033687 | Rn.107429 |
| A_44_P729931  | 0.632187 | 3.614977 | 0.001685 | -1.11137 | XM_001061367 |           |
| A_44_P808566  | 0.631451 | 3.321584 | 0.003337 | -1.6835  |              |           |
| A_43_P11350   | 0.629225 | 3.045993 | 0.006281 | -2.21195 | NM_001009271 | Rn.2956   |
| A_44_P637675  | 0.627415 | 3.168738 | 0.004746 | -1.97797 |              |           |
| A_44_P1024315 | 0.625645 | 2.99959  | 0.006978 | -2.29972 | NM_031321    | Rn.12298  |
| A_42_P560984  | 0.625403 | 4.167745 | 0.000459 | -0.02407 | XM_574891    | Rn.145579 |
| A_44_P1048140 | 0.620488 | 4.308368 | 0.000329 | 0.251834 | AI072036     | Rn.139210 |
| A_43_P12205   | 0.619793 | 2.980849 | 0.007281 | -2.33506 | NM_022294    | Rn.8731   |
| A_42_P558206  | 0.618407 | 3.089728 | 0.005686 | -2.12887 | AW144330     | Rn.204841 |
| A_44_P513232  | 0.618325 | 3.342207 | 0.003182 | -1.64354 | BC099181     | Rn.18207  |
| A_44_P747073  | 0.618093 | 3.38739  | 0.002865 | -1.55584 |              |           |
| A_43_P11654   | 0.616996 | 3.297049 | 0.003532 | -1.73097 | NM_013007    | Rn.87935  |
| A_44_P1007449 | 0.6148   | 3.201161 | 0.004405 | -1.91577 | XM_222190    | Rn.13452  |
| A_44_P1026706 | 0.612765 | 3.280038 | 0.003673 | -1.76384 | XM_001061644 |           |
| A_44_P900390  | 0.611891 | 3.947031 | 0.000772 | -0.45835 |              |           |
| A_42_P735417  | 0.610726 | 3.286718 | 0.003617 | -1.75093 | NM_175756    | Rn.33323  |
| A_44_P284079  | 0.610166 | 3.140546 | 0.005062 | -2.03192 |              |           |
| A_44_P839432  | 0.609938 | 3.301155 | 0.003499 | -1.72303 |              |           |
| A_44_P747182  | 0.60653  | 3.131454 | 0.005169 | -2.0493  |              |           |
| A_44_P376411  | 0.606227 | 3.648519 | 0.001558 | -1.04557 | BF548067     | Rn.164650 |
| A_44_P559242  | 0.605856 | 3.620395 | 0.001664 | -1.10074 | XM_001065920 | Rn.40465  |
| A_42_P694208  | 0.602707 | 2.994447 | 0.00706  | -2.30943 | XM_216483    | Rn.24241  |
| A_43_P17094   | 0.602556 | 3.07041  | 0.005941 | -2.16561 | XM_575803    | Rn.6325   |
| A_44_P977637  | 0.599374 | 3.82937  | 0.001018 | -0.69002 |              |           |

|               |          |          |          |          |              |           |
|---------------|----------|----------|----------|----------|--------------|-----------|
| A_43_P10036   | 0.598834 | 3.209102 | 0.004326 | -1.90051 |              |           |
| A_43_P11441   | 0.598154 | 3.01763  | 0.006699 | -2.26565 | NM_012510    | Rn.10033  |
| A_44_P113907  | 0.59688  | 2.940465 | 0.007975 | -2.41096 | NM_170787    | Rn.213719 |
| A_42_P620042  | 0.594377 | 2.873178 | 0.009277 | -2.53667 | NM_032080    | Rn.10426  |
| A_43_P14264   | 0.593121 | 3.283711 | 0.003642 | -1.75674 | NM_053653    | Rn.6913   |
| A_44_P311963  | 0.588438 | 3.808942 | 0.001069 | -0.73022 | XM_575939    | Rn.98341  |
| A_44_P420046  | 0.586908 | 4.136951 | 0.000493 | -0.08459 | NM_021669    | Rn.42103  |
| A_44_P653264  | 0.586072 | 3.147643 | 0.004981 | -2.01835 |              |           |
| A_44_P408050  | 0.585517 | 2.966132 | 0.007527 | -2.36276 | XM_343189    | Rn.99508  |
| A_44_P200522  | 0.584708 | 3.040838 | 0.006355 | -2.22172 | AI171232     | Rn.96234  |
| A_44_P404737  | 0.584359 | 3.045231 | 0.006292 | -2.21339 | BQ208553     | Rn.205491 |
| A_44_P1031380 | 0.584111 | 3.336205 | 0.003226 | -1.65517 | XM_001077462 | Rn.10092  |
| A_43_P22042   | 0.583503 | 2.870099 | 0.009341 | -2.5424  | NM_001009353 | Rn.90768  |
| A_43_P17061   | 0.582069 | 3.854289 | 0.00096  | -0.64096 | XM_223729    | Rn.32563  |
| A_44_P746478  | 0.581686 | 2.84888  | 0.009795 | -2.58182 |              |           |
| A_42_P829349  | 0.580869 | 3.811434 | 0.001062 | -0.72532 | XM_223785    | Rn.7399   |
| A_44_P1017035 | 0.580629 | 3.300734 | 0.003502 | -1.72384 | NM_019214    | Rn.11792  |
| A_44_P250575  | 0.580384 | 2.882513 | 0.009085 | -2.51929 | XM_214236    | Rn.144747 |
| A_43_P13381   | 0.577117 | 3.578162 | 0.001837 | -1.18352 | NM_139326    | Rn.108195 |
| A_44_P1026631 | 0.577082 | 3.216417 | 0.004254 | -1.88645 | XM_573823    | Rn.10557  |
| A_44_P255837  | 0.576706 | 3.225213 | 0.004168 | -1.86953 | XR_007349    | Rn.195887 |
| A_44_P215917  | 0.573202 | 2.88599  | 0.009015 | -2.51281 | XM_344018    | Rn.198266 |
| A_44_P686665  | 0.566384 | 2.962935 | 0.007581 | -2.36877 |              |           |
| A_44_P1036170 | 0.565807 | 3.011334 | 0.006795 | -2.27755 | XM_220770    | Rn.19087  |
| A_44_P434118  | 0.565666 | 2.983611 | 0.007235 | -2.32985 | XM_213408    | Rn.207605 |
| A_42_P695770  | 0.565462 | 3.938881 | 0.000787 | -0.4744  | XM_214288    | Rn.98475  |
| A_42_P686756  | 0.564589 | 2.924454 | 0.008268 | -2.44096 | BC087706     | Rn.172334 |
| A_42_P781585  | 0.56446  | 3.024954 | 0.006588 | -2.2518  | NM_001037554 | Rn.9287   |
| A_44_P1027971 | 0.564132 | 3.430071 | 0.002595 | -1.47281 | XM_001068081 |           |
| A_43_P15659   | 0.563997 | 4.011897 | 0.000662 | -0.33063 | XM_342062    |           |
| A_44_P457599  | 0.563541 | 3.265752 | 0.003797 | -1.79141 | NM_053832    | Rn.202954 |
| A_43_P17945   | 0.56207  | 3.01518  | 0.006736 | -2.27028 | NM_001014006 | Rn.53943  |
| A_43_P18226   | 0.561037 | 2.877533 | 0.009187 | -2.52856 | XM_234942    | Rn.198774 |
| A_44_P956958  | 0.560997 | 3.634502 | 0.00161  | -1.07307 | AW143890     | Rn.19306  |
| A_42_P747311  | 0.560893 | 2.91521  | 0.008442 | -2.45826 | NM_057204    | Rn.54442  |
| A_44_P533531  | 0.560063 | 3.364838 | 0.003019 | -1.59964 | AI406723     | Rn.144389 |
| A_44_P302265  | 0.558124 | 3.08554  | 0.00574  | -2.13684 | XM_001065833 | Rn.47025  |
| A_44_P1050510 | 0.55727  | 3.730183 | 0.001286 | -0.88515 | XM_001075804 |           |
| A_44_P302383  | 0.557114 | 3.05974  | 0.006088 | -2.18587 | XR_006725    | Rn.156427 |
| A_44_P273734  | 0.556905 | 3.263089 | 0.00382  | -1.79655 | BC090336     | Rn.3576   |
| A_44_P983188  | 0.555079 | 3.090441 | 0.005676 | -2.12751 | AA818818     | Rn.119809 |
| A_44_P128820  | 0.554639 | 4.004296 | 0.000674 | -0.34559 |              |           |
| A_42_P454907  | 0.554121 | 3.699759 | 0.001381 | -0.94494 | NM_053644    | Rn.208796 |
| A_43_P14870   | 0.553953 | 2.890333 | 0.008927 | -2.50471 | NM_001013224 | Rn.101356 |
| A_42_P771373  | 0.553627 | 3.586543 | 0.001801 | -1.1671  | NM_012614    | Rn.9714   |
| A_44_P454065  | 0.552253 | 3.04399  | 0.00631  | -2.21575 | NM_019147    | Rn.88804  |
| A_44_P527154  | 0.552208 | 3.479596 | 0.002312 | -1.37625 | NM_001024282 | Rn.196555 |
| A_42_P550172  | 0.55146  | 2.925806 | 0.008243 | -2.43843 | XM_001072438 | Rn.138353 |
| A_44_P356679  | 0.550647 | 3.482498 | 0.002296 | -1.37059 | XM_342932    | Rn.32671  |
| A_44_P186883  | 0.550626 | 3.206527 | 0.004351 | -1.90546 | NM_173103    | Rn.10339  |
| A_44_P731439  | 0.550347 | 3.488114 | 0.002267 | -1.35962 |              |           |
| A_44_P1020748 | 0.549987 | 3.451634 | 0.002468 | -1.43079 | XM_343405    | Rn.29863  |
| A_43_P19791   | 0.549438 | 2.95487  | 0.007721 | -2.38392 | XM_343063    | Rn.145668 |
| A_43_P13996   | 0.548706 | 2.983588 | 0.007236 | -2.3299  |              |           |
| A_42_P515028  | 0.548351 | 2.962016 | 0.007597 | -2.37049 | XM_574162    | Rn.24564  |
| A_44_P527089  | 0.5474   | 3.215169 | 0.004266 | -1.88885 | M11597       | Rn.90085  |
| A_44_P117015  | 0.546888 | 2.845737 | 0.009864 | -2.58765 | XM_342664    | Rn.18013  |
| A_44_P454847  | 0.546823 | 3.520162 | 0.002103 | -1.29701 | XM_342460    | Rn.108023 |

|               |          |          |          |          |              |           |
|---------------|----------|----------|----------|----------|--------------|-----------|
| A_42_P502768  | 0.543328 | 2.873787 | 0.009264 | -2.53553 | XM_001065468 | Rn.198509 |
| A_44_P974137  | 0.541887 | 4.053499 | 0.0006   | -0.24874 | AI716115     | Rn.100997 |
| A_44_P354018  | 0.540368 | 3.113921 | 0.00538  | -2.08277 | XM_224779    |           |
| A_43_P16588   | 0.540157 | 3.339672 | 0.0032   | -1.64845 | XM_342414    | Rn.16537  |
| A_44_P993027  | 0.538938 | 2.847305 | 0.00983  | -2.58474 | NM_017060    | Rn.11377  |
| A_44_P186860  | 0.537831 | 2.972818 | 0.007414 | -2.35018 | NM_030867    | Rn.8395   |
| A_44_P779143  | 0.537821 | 3.223984 | 0.00418  | -1.87189 |              |           |
| A_44_P468661  | 0.536414 | 3.330719 | 0.003267 | -1.6658  | XM_001067949 | Rn.27139  |
| A_42_P797965  | 0.535476 | 3.565821 | 0.00189  | -1.20769 | XM_341902    | Rn.106344 |
| A_44_P728951  | 0.534878 | 3.025448 | 0.006581 | -2.25086 | NM_031838    | Rn.2115   |
| A_44_P960935  | 0.5334   | 3.478224 | 0.002319 | -1.37893 |              |           |
| A_44_P525649  | 0.533214 | 3.327552 | 0.003291 | -1.67194 |              |           |
| A_44_P1020608 | 0.533079 | 2.941113 | 0.007964 | -2.40974 | XM_227821    | Rn.43876  |
| A_44_P115509  | 0.532461 | 3.365016 | 0.003018 | -1.59929 | CN542475     | Rn.2509   |
| A_44_P901878  | 0.531861 | 3.584054 | 0.001812 | -1.17198 |              |           |
| A_44_P389590  | 0.530125 | 3.019892 | 0.006664 | -2.26137 | XM_236348    | Rn.163026 |
| A_44_P1034346 | 0.527902 | 3.415038 | 0.002687 | -1.50207 | NM_001013922 | Rn.11832  |
| A_44_P996729  | 0.524978 | 3.290193 | 0.003588 | -1.74422 | NM_031054    | Rn.6422   |
| A_44_P792646  | 0.524628 | 3.04204  | 0.006338 | -2.21944 |              |           |
| A_44_P187641  | 0.524616 | 2.879368 | 0.009149 | -2.52515 | XM_342871    | Rn.98798  |
| A_42_P700089  | 0.52346  | 2.84146  | 0.009959 | -2.59558 | NM_001034157 | Rn.203143 |
| A_44_P791860  | 0.521772 | 3.60352  | 0.001731 | -1.13383 |              |           |
| A_42_P501233  | 0.521734 | 3.27362  | 0.003728 | -1.77623 | NM_024483    | Rn.11314  |
| A_44_P592844  | 0.521615 | 4.054903 | 0.000598 | -0.24598 |              |           |
| A_44_P159613  | 0.521193 | 3.000508 | 0.006964 | -2.29799 | XM_344763    | Rn.3278   |
| A_43_P14871   | 0.520827 | 3.495944 | 0.002226 | -1.34433 | NM_021587    | Rn.40942  |
| A_44_P792446  | 0.520423 | 2.880358 | 0.009129 | -2.5233  | XM_235529    | Rn.8673   |
| A_44_P189859  | 0.517844 | 3.025102 | 0.006586 | -2.25152 | NM_001012094 | Rn.7867   |
| A_43_P22700   | 0.517808 | 3.05666  | 0.00613  | -2.19172 |              |           |
| A_42_P578953  | 0.517652 | 2.878098 | 0.009175 | -2.52751 | XM_342416    | Rn.203694 |
| A_44_P210736  | 0.51718  | 2.88403  | 0.009054 | -2.51646 | XR_007818    | Rn.195982 |
| A_44_P668620  | 0.516418 | 3.307904 | 0.003444 | -1.70997 | XM_340915    | Rn.13165  |
| A_42_P837214  | 0.516128 | 3.100087 | 0.005553 | -2.10914 | NM_012861    | Rn.9836   |
| A_44_P164848  | 0.514671 | 2.98784  | 0.007166 | -2.32188 | AW142951     |           |
| A_43_P10498   | 0.514272 | 3.733602 | 0.001276 | -0.87843 | XM_237039    |           |
| A_44_P421333  | 0.513769 | 2.997905 | 0.007005 | -2.3029  | NM_080778    | Rn.17815  |
| A_44_P122206  | 0.513365 | 3.247602 | 0.003959 | -1.82641 | NM_022541    | Rn.3792   |
| A_44_P133485  | 0.512323 | 3.347197 | 0.003145 | -1.63386 | XM_342883    | Rn.87596  |
| A_44_P337311  | 0.511511 | 3.788606 | 0.001121 | -0.77024 | XM_342172    | Rn.11207  |
| A_44_P670043  | 0.510834 | 2.949975 | 0.007806 | -2.39312 |              |           |
| A_44_P1026123 | 0.509573 | 2.912482 | 0.008494 | -2.46336 | XM_341806    |           |
| A_44_P978083  | 0.507157 | 3.233427 | 0.00409  | -1.85372 |              |           |
| A_42_P737455  | 0.506634 | 3.512384 | 0.002142 | -1.31222 | AI071866     | Rn.166480 |
| A_44_P607632  | 0.505455 | 3.171842 | 0.004712 | -1.97202 | XM_001079243 | Rn.17349  |
| A_44_P412236  | 0.505256 | 3.225278 | 0.004168 | -1.8694  | NM_053730    | Rn.18997  |
| A_44_P976153  | 0.504629 | 3.596657 | 0.001759 | -1.14728 |              |           |
| A_44_P853624  | 0.503794 | 3.294774 | 0.003551 | -1.73536 | XM_237855    | Rn.29452  |
| A_44_P370645  | 0.503213 | 2.952194 | 0.007767 | -2.38895 | XM_216400    | Rn.103030 |
| A_44_P561643  | 0.502716 | 2.889284 | 0.008948 | -2.50667 |              |           |
| A_44_P274083  | 0.502042 | 2.968587 | 0.007485 | -2.35814 | NM_173105    | Rn.20144  |
| A_44_P263854  | 0.500949 | 3.539401 | 0.002011 | -1.25939 | AA819299     | Rn.35934  |
| A_44_P997787  | 0.499178 | 3.545056 | 0.001984 | -1.24833 | XM_213799    | Rn.13057  |
| A_44_P215056  | 0.49916  | 3.352026 | 0.00311  | -1.6245  | NM_001007235 | Rn.2135   |
| A_42_P621832  | 0.498006 | 3.413777 | 0.002695 | -1.50453 | XM_215083    | Rn.61660  |
| A_43_P12437   | 0.496721 | 2.897275 | 0.008789 | -2.49176 | NM_024385    | Rn.12188  |
| A_44_P513360  | 0.494845 | 3.886942 | 0.000889 | -0.57667 | XM_214152    | Rn.107220 |
| A_43_P14954   | 0.493343 | 3.238154 | 0.004046 | -1.84462 | XM_233820    | Rn.91844  |
| A_44_P447701  | 0.492105 | 2.893343 | 0.008867 | -2.4991  |              |           |

|               |          |          |          |          |              |           |
|---------------|----------|----------|----------|----------|--------------|-----------|
| A_43_P19306   | 0.491696 | 2.901791 | 0.0087   | -2.48333 | XM_223660    | Rn.6266   |
| A_43_P19265   | 0.490977 | 2.846506 | 0.009847 | -2.58622 | XM_342507    | Rn.205773 |
| A_44_P330109  | 0.490805 | 3.190897 | 0.00451  | -1.93547 | NM_040669    | Rn.17691  |
| A_43_P10072   | 0.490183 | 3.132327 | 0.005158 | -2.04763 | NM_213564    | Rn.15118  |
| A_44_P241190  | 0.48927  | 3.246072 | 0.003973 | -1.82936 | NM_001013199 | Rn.153577 |
| A_42_P601961  | 0.487725 | 2.915305 | 0.00844  | -2.45808 | XM_225203    | Rn.3005   |
| A_44_P932158  | 0.487385 | 3.142702 | 0.005037 | -2.0278  |              |           |
| A_42_P512838  | 0.487372 | 3.194685 | 0.004471 | -1.9282  | XM_217335    | Rn.106975 |
| A_44_P562712  | 0.486028 | 3.142979 | 0.005034 | -2.02727 |              |           |
| A_44_P409232  | 0.485898 | 3.284883 | 0.003633 | -1.75448 | NM_031543    | Rn.1372   |
| A_44_P370335  | 0.48549  | 3.011417 | 0.006794 | -2.27739 | NM_001011911 | Rn.137862 |
| A_44_P597013  | 0.484512 | 3.455686 | 0.002444 | -1.42289 |              |           |
| A_44_P713589  | 0.482311 | 2.905104 | 0.008636 | -2.47714 |              |           |
| A_44_P591963  | 0.481999 | 2.881548 | 0.009105 | -2.52109 | DV728639     | Rn.31695  |
| A_44_P822852  | 0.480143 | 2.907057 | 0.008598 | -2.4735  | XM_001073919 |           |
| A_43_P10505   | 0.479408 | 2.987691 | 0.007169 | -2.32217 | XM_226549    | Rn.19188  |
| A_44_P428922  | 0.479017 | 2.858597 | 0.009585 | -2.56378 | XM_341979    | Rn.4188   |
| A_42_P824657  | 0.47757  | 3.395593 | 0.002811 | -1.53989 | XM_214678    | Rn.106111 |
| A_44_P306626  | 0.476762 | 2.957734 | 0.007671 | -2.37854 | XM_577573    |           |
| A_44_P277669  | 0.47676  | 2.919375 | 0.008363 | -2.45047 | XM_573168    | Rn.17552  |
| A_42_P770330  | 0.47665  | 2.905529 | 0.008628 | -2.47635 | XM_001062632 |           |
| A_44_P125145  | 0.476294 | 3.001697 | 0.006945 | -2.29575 | CF109884     | Rn.22478  |
| A_44_P387314  | 0.476035 | 2.992752 | 0.007087 | -2.31262 |              |           |
| A_42_P738337  | 0.475807 | 3.1039   | 0.005505 | -2.10188 | NM_012575    | Rn.9709   |
| A_43_P16816   | 0.47557  | 2.880264 | 0.009131 | -2.52348 | NM_001044290 | Rn.168323 |
| A_44_P1022403 | 0.474294 | 3.431959 | 0.002583 | -1.46913 | NM_001004204 | Rn.99691  |
| A_42_P506956  | 0.473183 | 3.030181 | 0.006511 | -2.2419  | NM_133559    | Rn.2899   |
| A_43_P17196   | 0.473149 | 2.940814 | 0.007969 | -2.41031 | XM_576184    | Rn.9087   |
| A_44_P1058112 | 0.473068 | 3.475989 | 0.002332 | -1.38329 | NM_001009627 | Rn.163187 |
| A_44_P578250  | 0.472654 | 2.955687 | 0.007706 | -2.38239 | DV714571     | Rn.12430  |
| A_44_P290327  | 0.471468 | 2.889571 | 0.008942 | -2.50613 | NM_001004234 | Rn.154505 |
| A_44_P669746  | 0.471266 | 3.554143 | 0.001943 | -1.23055 | XM_229131    | Rn.20175  |
| A_44_P776556  | 0.470685 | 2.976764 | 0.007348 | -2.34275 | XM_342497    | Rn.23367  |
| A_44_P239176  | 0.468474 | 2.8779   | 0.009179 | -2.52788 | NM_001008380 | Rn.24884  |
| A_43_P14144   | 0.468252 | 3.43806  | 0.002547 | -1.45725 | XM_222855    | Rn.24811  |
| A_42_P700150  | 0.467273 | 4.006422 | 0.000671 | -0.34141 | BP483355     | Rn.199375 |
| A_44_P240414  | 0.466987 | 3.114036 | 0.005379 | -2.08255 | NM_001017537 | Rn.198161 |
| A_42_P515931  | 0.466948 | 2.882067 | 0.009094 | -2.52012 | XM_220256    |           |
| A_44_P225353  | 0.465362 | 2.893573 | 0.008862 | -2.49867 | NM_001009678 | Rn.59338  |
| A_44_P492624  | 0.465045 | 3.048643 | 0.006243 | -2.20692 | XM_340867    |           |
| A_44_P930534  | 0.464955 | 2.895203 | 0.00883  | -2.49563 | BC092660     | Rn.19800  |
| A_43_P11236   | 0.463992 | 3.566089 | 0.001889 | -1.20716 | NM_053538    | Rn.24799  |
| A_44_P281457  | 0.463175 | 3.050164 | 0.006222 | -2.20404 | XM_001054883 | Rn.129941 |
| A_44_P792746  | 0.462911 | 3.04413  | 0.006308 | -2.21548 |              |           |
| A_43_P10692   | 0.461194 | 2.880233 | 0.009132 | -2.52353 |              |           |
| A_44_P859124  | 0.460771 | 3.061668 | 0.006061 | -2.18221 | CB328239     | Rn.199012 |
| A_44_P437346  | 0.460583 | 3.378211 | 0.002927 | -1.57367 | AW435442     | Rn.23741  |
| A_44_P368513  | 0.459819 | 3.348318 | 0.003137 | -1.63169 | BF282682     | Rn.96145  |
| A_44_P816687  | 0.457365 | 3.01667  | 0.006713 | -2.26746 |              |           |
| A_44_P1008245 | 0.457175 | 3.177477 | 0.004652 | -1.96122 | XM_216310    | Rn.162764 |
| A_44_P997737  | 0.457138 | 2.873741 | 0.009265 | -2.53562 | AA942848     | Rn.7458   |
| A_44_P288443  | 0.456325 | 3.444562 | 0.002509 | -1.44458 | XM_344542    | Rn.100687 |
| A_44_P472635  | 0.454909 | 3.455808 | 0.002444 | -1.42266 | AA900458     | Rn.3340   |
| A_44_P938669  | 0.454871 | 2.949417 | 0.007816 | -2.39416 | BC127463     | Rn.146030 |
| A_44_P496788  | 0.454063 | 2.892821 | 0.008877 | -2.50007 | NM_001008295 | Rn.138993 |
| A_42_P459306  | 0.453602 | 2.8625   | 0.009502 | -2.55653 | CB314148     | Rn.1025   |
| A_44_P1030801 | 0.453237 | 3.093839 | 0.005632 | -2.12104 | NM_031749    | Rn.22161  |
| A_44_P557994  | 0.451938 | 3.461765 | 0.00241  | -1.41104 | XR_006555    | Rn.197577 |

|               |          |          |          |          |              |           |
|---------------|----------|----------|----------|----------|--------------|-----------|
| A_44_P142472  | 0.451815 | 3.521363 | 0.002097 | -1.29467 | XM_214293    | Rn.160899 |
| A_44_P1027866 | 0.45081  | 3.185967 | 0.004562 | -1.94493 | NM_001011925 | Rn.137413 |
| A_44_P292419  | 0.449724 | 3.052538 | 0.006188 | -2.19954 | AA944408     | Rn.96497  |
| A_44_P1045652 | 0.449511 | 2.871676 | 0.009308 | -2.53946 | XM_001057185 | Rn.9266   |
| A_44_P843798  | 0.448234 | 3.184221 | 0.00458  | -1.94828 | AW144049     | Rn.24594  |
| A_42_P792497  | 0.446787 | 2.952596 | 0.00776  | -2.38819 | NM_023025    | Rn.44992  |
| A_44_P747708  | 0.445849 | 3.047084 | 0.006265 | -2.20988 |              |           |
| A_42_P809733  | 0.445214 | 2.86869  | 0.009371 | -2.54502 | XM_347094    | Rn.24677  |
| A_44_P281216  | 0.444489 | 3.007757 | 0.00685  | -2.2843  | XM_341975    | Rn.23628  |
| A_42_P666843  | 0.44252  | 4.044054 | 0.000614 | -0.26733 | XM_214296    | Rn.19855  |
| A_44_P838483  | 0.439995 | 3.362802 | 0.003033 | -1.60359 |              |           |
| A_44_P980178  | 0.439693 | 2.956285 | 0.007696 | -2.38127 |              |           |
| A_42_P838051  | 0.439586 | 3.378402 | 0.002926 | -1.5733  | XM_216446    | Rn.14712  |
| A_44_P211997  | 0.436673 | 3.01299  | 0.00677  | -2.27442 | BF282863     | Rn.92148  |
| A_44_P381177  | 0.433194 | 3.01294  | 0.00677  | -2.27451 | AA925047     | Rn.5827   |
| A_44_P1058421 | 0.432785 | 2.963818 | 0.007566 | -2.36711 | BC091438     | Rn.101513 |
| A_44_P884119  | 0.432377 | 2.965508 | 0.007537 | -2.36393 | NM_001014061 | Rn.42180  |
| A_44_P303883  | 0.431123 | 2.981722 | 0.007266 | -2.33341 | AI602844     | Rn.38282  |
| A_43_P17192   | 0.430405 | 3.035662 | 0.00643  | -2.23153 |              |           |
| A_44_P274785  | 0.427234 | 2.885761 | 0.009019 | -2.51324 | XM_213260    | Rn.106750 |
| A_44_P1004260 | 0.426859 | 2.843252 | 0.009919 | -2.59226 | XM_231121    |           |
| A_44_P147888  | 0.424227 | 2.870978 | 0.009323 | -2.54076 | AA925444     | Rn.8224   |
| A_43_P11580   | 0.423705 | 2.989546 | 0.007139 | -2.31867 | NM_012833    | Rn.10265  |
| A_44_P402559  | 0.422607 | 3.4454   | 0.002504 | -1.44294 | NM_001000910 | Rn.142331 |
| A_44_P307646  | 0.422312 | 3.162588 | 0.004813 | -1.98975 | BI289723     | Rn.162620 |
| A_44_P591370  | 0.421966 | 3.028304 | 0.006538 | -2.24546 |              |           |
| A_44_P993577  | 0.42188  | 3.113554 | 0.005385 | -2.08347 | XM_214633    | Rn.18307  |
| A_44_P710192  | 0.419518 | 2.943288 | 0.007925 | -2.40566 | NM_001033067 | Rn.42073  |
| A_44_P251542  | 0.418155 | 3.706452 | 0.00136  | -0.93179 | NM_001008864 | Rn.126315 |
| A_44_P1045612 | 0.416475 | 3.083853 | 0.005762 | -2.14005 | NM_172317    | Rn.3896   |
| A_44_P156317  | 0.413928 | 3.10122  | 0.005538 | -2.10698 | NM_138910    | Rn.7262   |
| A_42_P705083  | 0.413592 | 3.145056 | 0.00501  | -2.0233  | XM_341621    | Rn.50003  |
| A_44_P638411  | 0.411681 | 2.853388 | 0.009697 | -2.57345 |              |           |
| A_44_P1030648 | 0.41131  | 2.865526 | 0.009437 | -2.5509  | XM_001079792 | Rn.196319 |
| A_43_P23304   | 0.410921 | 3.089621 | 0.005687 | -2.12907 | NM_199397    | Rn.204521 |
| A_44_P476237  | 0.409138 | 3.115608 | 0.005359 | -2.07955 | BF406637     | Rn.7586   |
| A_44_P822839  | 0.408016 | 2.958897 | 0.007651 | -2.37636 |              |           |
| A_44_P890053  | 0.407782 | 3.120236 | 0.005303 | -2.07072 | CA505010     | Rn.31650  |
| A_44_P899264  | 0.405945 | 2.944854 | 0.007897 | -2.40273 |              |           |
| A_44_P421534  | 0.405341 | 3.094016 | 0.00563  | -2.1207  | NM_017196    | Rn.32080  |
| A_44_P981783  | 0.402686 | 2.964042 | 0.007562 | -2.36669 |              |           |
| A_44_P558411  | 0.39837  | 3.108826 | 0.005443 | -2.09248 | NM_033499    | Rn.7724   |
| A_42_P802520  | 0.396592 | 2.88759  | 0.008982 | -2.50983 | NM_172063    | Rn.7844   |
| A_44_P340498  | 0.396466 | 2.979403 | 0.007304 | -2.33778 | XM_213445    | Rn.107812 |
| A_44_P1050444 | 0.396311 | 2.966331 | 0.007523 | -2.36238 | NM_001007749 | Rn.106766 |
| A_44_P229769  | 0.395256 | 3.053513 | 0.006174 | -2.19769 | NM_031838    | Rn.2115   |
| A_44_P140266  | 0.39507  | 2.958909 | 0.007651 | -2.37634 | XM_227523    | Rn.46389  |
| A_44_P562685  | 0.393179 | 3.317519 | 0.003369 | -1.69136 | XM_575917    | Rn.6676   |
| A_44_P810151  | 0.392701 | 3.328845 | 0.003282 | -1.66943 |              |           |
| A_43_P14262   | 0.391785 | 3.005939 | 0.006879 | -2.28774 | XM_001057346 | Rn.14962  |
| A_44_P422602  | 0.390835 | 2.96519  | 0.007543 | -2.36453 | AI177360     | Rn.3093   |
| A_44_P667745  | 0.387442 | 2.958169 | 0.007663 | -2.37772 | DY311022     | Rn.198695 |
| A_44_P475617  | 0.386967 | 3.213792 | 0.004279 | -1.89149 | XM_238082    | Rn.153598 |
| A_43_P21364   | 0.383104 | 2.963846 | 0.007566 | -2.36706 | XM_343342    | Rn.56018  |
| A_44_P399999  | 0.379395 | 2.872445 | 0.009292 | -2.53803 | NM_053752    | Rn.3766   |
| A_44_P1002320 | 0.378477 | 3.037917 | 0.006397 | -2.22725 | BF289377     | Rn.11887  |
| A_44_P505188  | 0.378105 | 2.861306 | 0.009527 | -2.55875 | AI454498     | Rn.98152  |
| A_44_P378322  | 0.375598 | 3.11716  | 0.00534  | -2.07659 | AA858768     |           |

|               |          |          |          |          |              |           |
|---------------|----------|----------|----------|----------|--------------|-----------|
| A_44_P290016  | 0.375006 | 2.869646 | 0.009351 | -2.54324 | BG666843     | Rn.163635 |
| A_43_P22494   | 0.37441  | 2.98671  | 0.007185 | -2.32401 |              |           |
| A_43_P16530   | 0.374106 | 2.874744 | 0.009245 | -2.53376 | XM_213733    | Rn.16344  |
| A_44_P1043668 | 0.372798 | 3.005015 | 0.006893 | -2.28948 | NM_001014003 | Rn.36169  |
| A_44_P1051894 | 0.368997 | 2.981165 | 0.007275 | -2.33446 | XR_009243    | Rn.23050  |
| A_44_P1047992 | 0.367006 | 2.935442 | 0.008066 | -2.42038 | NM_012803    | Rn.91064  |
| A_42_P685138  | 0.366955 | 2.875254 | 0.009234 | -2.53281 | NM_153621    | Rn.206534 |
| A_44_P351239  | 0.366576 | 2.899928 | 0.008737 | -2.48681 | NM_001000949 | Rn.141828 |
| A_43_P16804   | 0.363022 | 2.983577 | 0.007236 | -2.32992 | NM_001007652 | Rn.3290   |
| A_42_P626023  | 0.358798 | 2.843669 | 0.00991  | -2.59148 | XM_224232    | Rn.19524  |
| A_44_P134465  | 0.350702 | 2.917437 | 0.0084   | -2.45409 | AA963226     | Rn.7262   |
| A_44_P257522  | 0.348981 | 2.94563  | 0.007883 | -2.40127 | XM_574228    | Rn.137597 |
| A_44_P178014  | 0.346895 | 2.941703 | 0.007953 | -2.40864 | BC079202     | Rn.108613 |
| A_44_P273515  | 0.339925 | 3.104249 | 0.0055   | -2.10121 | DV723169     | Rn.87868  |
| A_44_P108993  | 0.338519 | 3.041493 | 0.006345 | -2.22048 | BF420718     | Rn.199052 |
| A_43_P14576   | 0.33491  | 3.053342 | 0.006177 | -2.19801 |              |           |
| A_44_P794680  | 0.332151 | 2.872494 | 0.009291 | -2.53794 |              |           |
| A_44_P505488  | 0.329268 | 2.891953 | 0.008895 | -2.50169 | BI288152     | Rn.73677  |
| A_44_P591036  | 0.30765  | 2.878633 | 0.009164 | -2.52651 | XM_001069503 |           |
| A_44_P388709  | -0.27711 | -2.92542 | 0.00825  | -2.43915 | NM_145767    | Rn.10189  |
| A_44_P163408  | -0.30136 | -2.9754  | 0.007371 | -2.34532 | NM_031798    | Rn.11523  |
| A_44_P370774  | -0.30644 | -2.85795 | 0.009599 | -2.56498 | XM_235183    | Rn.161928 |
| A_44_P300110  | -0.31546 | -2.96537 | 0.00754  | -2.36419 | XM_234335    | Rn.16048  |
| A_44_P515461  | -0.31765 | -2.8635  | 0.00948  | -2.55466 | NM_171990    | Rn.8453   |
| A_44_P228903  | -0.31934 | -3.09516 | 0.005616 | -2.11852 | NM_078621    | Rn.212750 |
| A_44_P349720  | -0.32616 | -3.02935 | 0.006523 | -2.24349 | NM_001039174 | Rn.162979 |
| A_44_P374795  | -0.32804 | -2.87231 | 0.009295 | -2.53828 | XM_232197    | Rn.7350   |
| A_44_P242252  | -0.32834 | -2.90914 | 0.008558 | -2.46961 | NM_031237    | Rn.2778   |
| A_44_P557376  | -0.33462 | -2.87129 | 0.009316 | -2.54018 | NM_012546    | Rn.24039  |
| A_43_P18979   | -0.33798 | -2.87551 | 0.009229 | -2.53232 | XM_340992    | Rn.198272 |
| A_43_P16060   | -0.33835 | -3.09337 | 0.005639 | -2.12194 | XM_001065759 | Rn.207359 |
| A_44_P332429  | -0.34648 | -3.15692 | 0.004876 | -2.00061 | NM_138900    | Rn.4037   |
| A_44_P274526  | -0.34742 | -3.37997 | 0.002915 | -1.57025 | XM_230889    | Rn.104945 |
| A_44_P865552  | -0.35207 | -2.95792 | 0.007668 | -2.37819 | AW143038     | Rn.31067  |
| A_44_P291081  | -0.35425 | -2.92225 | 0.008309 | -2.44508 | XM_001054316 | Rn.154642 |
| A_44_P372555  | -0.35573 | -2.88808 | 0.008972 | -2.50891 | NM_175764    | Rn.10541  |
| A_44_P604860  | -0.35591 | -2.92551 | 0.008249 | -2.43899 | BC098774     | Rn.23514  |
| A_44_P150432  | -0.356   | -3.90886 | 0.000845 | -0.53351 | D38557       |           |
| A_43_P15352   | -0.36057 | -3.06041 | 0.006078 | -2.1846  | NM_080577    | Rn.144645 |
| A_43_P18495   | -0.36216 | -2.85334 | 0.009698 | -2.57354 | NM_001011952 | Rn.28321  |
| A_44_P304374  | -0.36385 | -2.95064 | 0.007795 | -2.39186 | NM_001012745 | Rn.105961 |
| A_44_P187388  | -0.37136 | -2.93285 | 0.008114 | -2.42524 | XR_006961    | Rn.197837 |
| A_44_P464428  | -0.37173 | -3.80866 | 0.001069 | -0.73078 | XM_343279    | Rn.135394 |
| A_43_P21231   | -0.37205 | -2.91815 | 0.008386 | -2.45275 | XM_217594    | Rn.98526  |
| A_42_P703664  | -0.37262 | -2.90802 | 0.00858  | -2.47169 | CV118897     | Rn.2835   |
| A_44_P1010416 | -0.37272 | -3.37702 | 0.002935 | -1.57598 | NM_001002853 | Rn.209780 |
| A_44_P187524  | -0.37635 | -2.91619 | 0.008423 | -2.45643 | XM_214690    | Rn.8645   |
| A_44_P527635  | -0.37735 | -2.9018  | 0.0087   | -2.48332 | NM_001014055 | Rn.72687  |
| A_44_P874814  | -0.37738 | -2.95738 | 0.007677 | -2.3792  |              |           |
| A_44_P437973  | -0.37778 | -3.08967 | 0.005686 | -2.12898 | NM_020090    | Rn.205732 |
| A_44_P412418  | -0.37849 | -3.1606  | 0.004835 | -1.99356 | XM_001063618 | Rn.214693 |
| A_43_P17282   | -0.3807  | -3.22863 | 0.004136 | -1.86296 | XM_219879    | Rn.87733  |
| A_44_P180645  | -0.38258 | -3.0295  | 0.006521 | -2.2432  | BC098851     | Rn.74199  |
| A_44_P333452  | -0.38551 | -3.17521 | 0.004676 | -1.96556 | XM_347258    | Rn.17832  |
| A_44_P1000561 | -0.38605 | -2.97455 | 0.007385 | -2.34692 | XM_235378    | Rn.19593  |
| A_44_P136911  | -0.38622 | -3.05054 | 0.006216 | -2.20332 | BC078917     | Rn.8555   |
| A_43_P16885   | -0.38682 | -2.96898 | 0.007478 | -2.35739 | XM_235169    | Rn.91829  |
| A_44_P536125  | -0.38814 | -3.02661 | 0.006564 | -2.24867 | NM_053557    | Rn.33389  |



|               |          |          |          |          |              |           |
|---------------|----------|----------|----------|----------|--------------|-----------|
| A_44_P656668  | -0.38824 | -2.86918 | 0.009361 | -2.54411 | CK476135     | Rn.168123 |
| A_44_P154721  | -0.3897  | -3.03107 | 0.006498 | -2.24023 | XM_220217    | Rn.45317  |
| A_44_P116606  | -0.39262 | -2.98599 | 0.007196 | -2.32538 | XM_342337    | Rn.133131 |
| A_43_P12267   | -0.3927  | -3.44003 | 0.002535 | -1.4534  | NM_022623    | Rn.48736  |
| A_44_P829047  | -0.39348 | -3.00345 | 0.006918 | -2.29244 | CO402576     | Rn.170969 |
| A_44_P541431  | -0.3953  | -2.84737 | 0.009828 | -2.58461 | NM_001024246 | Rn.24927  |
| A_44_P925410  | -0.39681 | -3.35767 | 0.00307  | -1.61355 | BF386740     | Rn.164774 |
| A_43_P22351   | -0.39861 | -2.98814 | 0.007162 | -2.32132 | NM_001024968 | Rn.16498  |
| A_43_P19646   | -0.39904 | -3.37204 | 0.002969 | -1.58566 | XM_341833    |           |
| A_44_P984158  | -0.40054 | -3.37646 | 0.002939 | -1.57708 | BI291259     | Rn.210959 |
| A_43_P11729   | -0.4012  | -3.11769 | 0.005334 | -2.07558 | NM_013134    | Rn.9437   |
| A_44_P184955  | -0.40216 | -2.84347 | 0.009914 | -2.59185 | XM_215006    | Rn.48     |
| A_44_P374341  | -0.40241 | -2.84908 | 0.009791 | -2.58144 | NM_001029897 | Rn.8394   |
| A_44_P395572  | -0.40262 | -3.15562 | 0.004891 | -2.00308 | NM_147210    | Rn.10055  |
| A_43_P18148   | -0.40267 | -2.93286 | 0.008113 | -2.42523 | XM_218963    | Rn.106856 |
| A_44_P333374  | -0.40293 | -3.17212 | 0.004709 | -1.97148 | XM_001064905 | Rn.200853 |
| A_44_P998042  | -0.40503 | -3.09585 | 0.005607 | -2.11722 | XM_229579    | Rn.101585 |
| A_44_P128986  | -0.40663 | -3.06591 | 0.006003 | -2.17415 | NM_001034959 | Rn.162222 |
| A_44_P893828  | -0.4084  | -2.85027 | 0.009765 | -2.57923 |              |           |
| A_42_P584710  | -0.40976 | -3.09809 | 0.005578 | -2.11294 | XM_213677    | Rn.24350  |
| A_44_P545649  | -0.41176 | -3.63974 | 0.00159  | -1.06279 | NM_001014093 | Rn.23423  |
| A_44_P147980  | -0.41267 | -3.16439 | 0.004793 | -1.98629 | XM_576503    | Rn.203950 |
| A_44_P126027  | -0.41471 | -3.39222 | 0.002833 | -1.54646 | NM_019333    | Rn.90092  |
| A_44_P149599  | -0.41546 | -2.90685 | 0.008602 | -2.47388 | NM_001079705 | Rn.16095  |
| A_43_P22795   | -0.41616 | -2.88041 | 0.009128 | -2.52321 | NM_001037204 | Rn.163238 |
| A_44_P303716  | -0.41734 | -3.2341  | 0.004084 | -1.85242 | XM_345266    | Rn.7999   |
| A_44_P100609  | -0.41831 | -2.90845 | 0.008571 | -2.4709  | XM_001064153 | Rn.195635 |
| A_44_P655158  | -0.4186  | -3.01823 | 0.00669  | -2.26452 | CO567276     | Rn.203592 |
| A_44_P337579  | -0.41874 | -2.98399 | 0.007229 | -2.32913 | NM_001008346 | Rn.14828  |
| A_43_P16847   | -0.41912 | -3.22015 | 0.004217 | -1.87927 | XM_233686    | Rn.75037  |
| A_44_P523190  | -0.42005 | -3.24038 | 0.004025 | -1.84034 | XM_343095    | Rn.140091 |
| A_44_P683082  | -0.42234 | -2.88885 | 0.008957 | -2.50748 |              |           |
| A_44_P473314  | -0.42418 | -2.8769  | 0.0092   | -2.52974 | NM_001013997 | Rn.139140 |
| A_44_P729266  | -0.42506 | -3.15391 | 0.00491  | -2.00636 | XR_005718    | Rn.216190 |
| A_44_P357870  | -0.42506 | -3.01038 | 0.00681  | -2.27935 | NM_031559    | Rn.2856   |
| A_43_P15840   | -0.42512 | -3.05402 | 0.006167 | -2.19672 | XM_221874    | Rn.6774   |
| A_44_P166464  | -0.42539 | -3.06617 | 0.005999 | -2.17367 | XM_235050    | Rn.103930 |
| A_43_P15468   | -0.42609 | -3.16332 | 0.004805 | -1.98835 | NM_012585    | Rn.44486  |
| A_44_P549198  | -0.42676 | -2.96309 | 0.007579 | -2.36849 | XM_224165    | Rn.132110 |
| A_44_P520700  | -0.42685 | -2.98657 | 0.007187 | -2.32428 | XM_341377    | Rn.105397 |
| A_44_P986848  | -0.42793 | -3.24133 | 0.004016 | -1.8385  | XM_341882    | Rn.7634   |
| A_44_P206258  | -0.43084 | -2.93552 | 0.008065 | -2.42023 | NM_001034146 | Rn.24862  |
| A_44_P123813  | -0.43159 | -3.14524 | 0.005008 | -2.02295 | XM_223597    | Rn.114948 |
| A_44_P258277  | -0.43204 | -2.95456 | 0.007726 | -2.3845  | NM_001008507 | Rn.203124 |
| A_44_P304493  | -0.43247 | -3.24532 | 0.00398  | -1.8308  | NM_001024970 | Rn.213413 |
| A_44_P668388  | -0.43357 | -2.85225 | 0.009722 | -2.57556 | BC098022     | Rn.117989 |
| A_44_P1004392 | -0.43527 | -3.35998 | 0.003053 | -1.60907 | XM_221455    | Rn.138746 |
| A_44_P328654  | -0.43642 | -2.95673 | 0.007688 | -2.38042 | XM_576882    | Rn.155010 |
| A_43_P19234   | -0.43781 | -2.88006 | 0.009135 | -2.52386 | NM_001034926 | Rn.106141 |
| A_44_P1026191 | -0.43806 | -3.23707 | 0.004056 | -1.8467  | NM_001039338 | Rn.4240   |
| A_44_P116809  | -0.43918 | -3.84083 | 0.000991 | -0.66746 | NM_001014136 | Rn.108552 |
| A_44_P501242  | -0.43922 | -3.00717 | 0.006859 | -2.28542 | XM_215947    | Rn.20691  |
| A_44_P327515  | -0.4406  | -3.24906 | 0.003946 | -1.8236  | XM_001060307 | Rn.16458  |
| A_44_P206154  | -0.4407  | -3.10407 | 0.005502 | -2.10154 | XM_345231    | Rn.162605 |
| A_43_P10608   | -0.44239 | -3.3871  | 0.002867 | -1.5564  | XR_006750    | Rn.27612  |
| A_44_P188869  | -0.44305 | -3.2967  | 0.003535 | -1.73163 | AW915311     | Rn.74134  |
| A_44_P333550  | -0.44326 | -3.44815 | 0.002488 | -1.43758 | NM_001013986 | Rn.23222  |
| A_44_P360563  | -0.44391 | -3.2587  | 0.003859 | -1.80503 | NM_017012    | Rn.29972  |

|               |          |          |          |          |              |           |
|---------------|----------|----------|----------|----------|--------------|-----------|
| A_44_P456747  | -0.44521 | -3.18332 | 0.00459  | -1.95    | AB012231     | Rn.40435  |
| A_43_P12243   | -0.44537 | -3.0277  | 0.006547 | -2.2466  | NM_022540    | Rn.2011   |
| A_44_P134186  | -0.4455  | -3.04818 | 0.00625  | -2.2078  | NM_145678    | Rn.12477  |
| A_44_P377722  | -0.44603 | -2.84796 | 0.009816 | -2.58352 | NM_001007651 | Rn.96097  |
| A_44_P183227  | -0.44645 | -2.93765 | 0.008026 | -2.41623 | CO394022     | Rn.100426 |
| A_44_P545867  | -0.44655 | -3.77292 | 0.001163 | -0.80111 | XM_222229    | Rn.204260 |
| A_42_P574960  | -0.44781 | -3.69359 | 0.001401 | -0.95707 | XR_009643    | Rn.12130  |
| A_44_P682849  | -0.44825 | -3.11801 | 0.00533  | -2.07497 | XM_001081465 |           |
| A_44_P462285  | -0.45038 | -3.33703 | 0.00322  | -1.65358 | XM_342391    | Rn.6975   |
| A_44_P170864  | -0.45042 | -3.03589 | 0.006427 | -2.2311  | XM_223651    | Rn.105388 |
| A_44_P729342  | -0.4519  | -2.94146 | 0.007958 | -2.40909 | XR_009643    |           |
| A_44_P124027  | -0.45232 | -3.64745 | 0.001562 | -1.04766 | XM_226458    | Rn.50250  |
| A_44_P193644  | -0.45245 | -2.87449 | 0.00925  | -2.53423 | XM_001062296 | Rn.22904  |
| A_44_P466608  | -0.45412 | -2.93843 | 0.008012 | -2.41478 | XM_238380    | Rn.44078  |
| A_43_P22288   | -0.45513 | -2.91168 | 0.008509 | -2.46486 | XM_001068814 | Rn.7810   |
| A_44_P437721  | -0.45517 | -3.23173 | 0.004106 | -1.85699 | CO566833     | Rn.202638 |
| A_44_P449819  | -0.45565 | -3.03144 | 0.006492 | -2.23952 | NM_053851    | Rn.10739  |
| A_44_P443493  | -0.45642 | -2.94761 | 0.007848 | -2.39755 | NM_001025754 | Rn.154781 |
| A_43_P17816   | -0.45667 | -2.86919 | 0.00936  | -2.54408 | NM_199120    | Rn.47911  |
| A_44_P544297  | -0.45713 | -3.20162 | 0.004401 | -1.91488 | NM_001009661 | Rn.67490  |
| A_44_P114184  | -0.45758 | -2.8773  | 0.009192 | -2.52899 | NM_022543    | Rn.2193   |
| A_44_P485592  | -0.45768 | -2.85191 | 0.009729 | -2.57619 | XM_217388    | Rn.13913  |
| A_44_P257832  | -0.45849 | -2.95075 | 0.007793 | -2.39166 | XM_224535    | Rn.92109  |
| A_44_P174982  | -0.45879 | -3.17361 | 0.004693 | -1.96862 | NM_022601    | Rn.158883 |
| A_43_P10332   | -0.46048 | -3.21317 | 0.004285 | -1.89269 | XR_009629    | Rn.47423  |
| A_44_P759334  | -0.46188 | -2.85273 | 0.009711 | -2.57467 | NM_001011914 | Rn.6666   |
| A_44_P424069  | -0.46397 | -3.73575 | 0.001269 | -0.8742  | XM_218463    | Rn.213001 |
| A_44_P324034  | -0.46547 | -3.0331  | 0.006468 | -2.23638 | XM_235942    | Rn.92828  |
| A_43_P19519   | -0.46565 | -3.61272 | 0.001694 | -1.11578 | XM_223781    | Rn.164613 |
| A_43_P22080   | -0.46567 | -3.20162 | 0.004401 | -1.91489 | NM_001012044 | Rn.14256  |
| A_43_P15916   | -0.46586 | -3.04935 | 0.006233 | -2.20558 | XM_342491    | Rn.20282  |
| A_44_P249717  | -0.46592 | -3.18306 | 0.004592 | -1.95051 | AW144114     | Rn.27433  |
| A_43_P10414   | -0.46648 | -3.54962 | 0.001963 | -1.2394  | NM_001017445 | Rn.203456 |
| A_44_P515792  | -0.46682 | -2.9115  | 0.008513 | -2.46519 | XM_341532    | Rn.24911  |
| A_44_P260475  | -0.46702 | -2.98321 | 0.007242 | -2.33061 | XM_238362    | Rn.28065  |
| A_44_P492629  | -0.46977 | -2.84876 | 0.009798 | -2.58204 | DV727624     | Rn.203850 |
| A_44_P412710  | -0.46992 | -3.09009 | 0.005681 | -2.12818 | NM_001025423 | Rn.17173  |
| A_44_P211111  | -0.47024 | -2.94709 | 0.007857 | -2.39853 | XM_236367    | Rn.147817 |
| A_44_P445521  | -0.47043 | -3.86055 | 0.000946 | -0.62864 | XM_226843    | Rn.41113  |
| A_44_P267501  | -0.47192 | -2.97701 | 0.007344 | -2.34228 | NM_001017448 | Rn.72531  |
| A_44_P520557  | -0.47244 | -2.8786  | 0.009165 | -2.52658 | XM_230284    | Rn.64898  |
| A_43_P21150   | -0.47247 | -2.97532 | 0.007372 | -2.34548 | XM_345825    | Rn.15910  |
| A_44_P484877  | -0.47253 | -2.85768 | 0.009604 | -2.56548 | AF475093     | Rn.3040   |
| A_44_P283772  | -0.47292 | -3.07687 | 0.005855 | -2.15332 | XM_573876    | Rn.162262 |
| A_44_P345136  | -0.47316 | -2.9995  | 0.00698  | -2.29989 | XM_340879    | Rn.24583  |
| A_44_P625829  | -0.47415 | -2.87192 | 0.009303 | -2.53901 |              |           |
| A_44_P427067  | -0.47471 | -2.92813 | 0.0082   | -2.43407 | XM_001076752 | Rn.204813 |
| A_43_P13424   | -0.47481 | -3.15426 | 0.004906 | -2.0057  | NM_173290    | Rn.162877 |
| A_44_P231655  | -0.47639 | -2.94462 | 0.007901 | -2.40317 | XM_222147    | Rn.214191 |
| A_44_P414704  | -0.47772 | -2.93625 | 0.008052 | -2.41886 |              |           |
| A_44_P397851  | -0.47778 | -2.98688 | 0.007182 | -2.32369 | NM_053518    | Rn.44274  |
| A_44_P730048  | -0.47798 | -2.91687 | 0.008411 | -2.45516 |              |           |
| A_43_P21938   | -0.47819 | -2.93355 | 0.008101 | -2.42392 | XM_220541    | Rn.17602  |
| A_44_P381842  | -0.47935 | -2.85471 | 0.009669 | -2.571   | XM_343640    | Rn.205336 |
| A_44_P1058502 | -0.4794  | -3.2103  | 0.004314 | -1.8982  | XM_238162    | Rn.105910 |
| A_44_P463973  | -0.47994 | -3.04737 | 0.006261 | -2.20934 | NM_001079889 | Rn.100471 |
| A_44_P126498  | -0.47995 | -2.87826 | 0.009172 | -2.52721 | XM_234272    | Rn.96357  |
| A_43_P15409   | -0.48005 | -3.04994 | 0.006225 | -2.20447 | NM_023971    | Rn.162341 |

|               |          |          |          |          |              |           |
|---------------|----------|----------|----------|----------|--------------|-----------|
| A_44_P384833  | -0.48023 | -2.9969  | 0.007021 | -2.30481 | XM_343166    | Rn.92148  |
| A_44_P324124  | -0.48059 | -2.84088 | 0.009972 | -2.59664 | XM_220595    | Rn.203763 |
| A_44_P350098  | -0.48064 | -3.05518 | 0.006151 | -2.19453 | XM_345938    | Rn.135879 |
| A_44_P107177  | -0.48124 | -2.90317 | 0.008674 | -2.48076 | NM_017018    | Rn.81032  |
| A_42_P645142  | -0.48345 | -2.92485 | 0.008261 | -2.44022 | NM_019375    | Rn.48803  |
| A_44_P356445  | -0.48386 | -3.42438 | 0.002629 | -1.48388 | XM_227547    | Rn.162624 |
| A_44_P376905  | -0.48447 | -3.34695 | 0.003147 | -1.63434 | XM_214994    | Rn.7939   |
| A_44_P532020  | -0.48493 | -2.89266 | 0.008881 | -2.50037 | XM_219414    | Rn.102186 |
| A_44_P501220  | -0.48534 | -3.3408  | 0.003192 | -1.64627 | NM_053951    | Rn.81062  |
| A_44_P331109  | -0.48553 | -3.04809 | 0.006251 | -2.20797 | XM_220175    | Rn.49741  |
| A_44_P105229  | -0.48555 | -3.2408  | 0.004021 | -1.83951 | NM_001013157 | Rn.3128   |
| A_44_P664802  | -0.48591 | -2.95902 | 0.007649 | -2.37613 | DV728182     | Rn.164504 |
| A_44_P136845  | -0.48601 | -3.06977 | 0.00595  | -2.16681 | XM_340879    | Rn.24583  |
| A_44_P397495  | -0.4878  | -3.24097 | 0.00402  | -1.83919 | NM_024359    | Rn.10852  |
| A_44_P311955  | -0.48841 | -3.19652 | 0.004453 | -1.92467 | NM_017171    | Rn.159093 |
| A_42_P765031  | -0.48852 | -2.95014 | 0.007803 | -2.3928  | XM_346083    | Rn.15475  |
| A_44_P480830  | -0.48934 | -3.11408 | 0.005378 | -2.08246 | NM_001079943 | Rn.120278 |
| A_44_P661516  | -0.4905  | -3.44322 | 0.002516 | -1.44718 |              |           |
| A_43_P18324   | -0.49096 | -3.08858 | 0.0057   | -2.13105 | NM_207165    | Rn.105801 |
| A_44_P215931  | -0.49107 | -3.19707 | 0.004447 | -1.92361 | AI232088     | Rn.7630   |
| A_44_P501992  | -0.49147 | -3.30406 | 0.003475 | -1.71741 | BC071175     | Rn.64648  |
| A_44_P693682  | -0.49161 | -2.88948 | 0.008944 | -2.50631 |              |           |
| A_43_P12802   | -0.49163 | -3.43107 | 0.002589 | -1.47085 | NM_053418    | Rn.11946  |
| A_43_P18343   | -0.49212 | -3.14003 | 0.005068 | -2.03291 | XM_001072617 | Rn.18248  |
| A_44_P299123  | -0.49241 | -3.26694 | 0.003786 | -1.78913 | XM_215847    | Rn.162718 |
| A_44_P301512  | -0.49254 | -3.3645  | 0.003021 | -1.6003  | NM_176077    | Rn.66254  |
| A_42_P612592  | -0.49502 | -3.40554 | 0.002747 | -1.52055 | XM_001067905 |           |
| A_44_P583834  | -0.49572 | -3.10123 | 0.005538 | -2.10696 | XM_223597    | Rn.114948 |
| A_44_P534113  | -0.49615 | -2.92727 | 0.008216 | -2.43569 | NM_053866    | Rn.22260  |
| A_44_P409977  | -0.49681 | -3.33505 | 0.003235 | -1.65741 | NM_001012742 | Rn.208255 |
| A_44_P403816  | -0.49734 | -3.3934  | 0.002825 | -1.54417 | AW142588     | Rn.164773 |
| A_44_P1057763 | -0.49735 | -2.98209 | 0.00726  | -2.33271 | NM_053576    | Rn.42     |
| A_44_P768438  | -0.49816 | -3.59387 | 0.00177  | -1.15275 | XM_225314    | Rn.146842 |
| A_44_P539167  | -0.49833 | -3.83026 | 0.001016 | -0.68827 | XR_009059    | Rn.196664 |
| A_44_P729229  | -0.49851 | -2.96652 | 0.00752  | -2.36204 | XR_009322    | Rn.197449 |
| A_44_P210753  | -0.49943 | -3.05798 | 0.006112 | -2.18921 | M22631       | Rn.6033   |
| A_44_P935947  | -0.49967 | -3.17126 | 0.004718 | -1.97313 | XM_342684    | Rn.4057   |
| A_44_P303044  | -0.49995 | -3.02514 | 0.006585 | -2.25144 | XM_239258    | Rn.7144   |
| A_44_P555760  | -0.50031 | -3.53246 | 0.002044 | -1.27297 | XM_001064688 | Rn.213803 |
| A_44_P286467  | -0.50037 | -2.84527 | 0.009875 | -2.58852 | XM_237056    | Rn.63731  |
| A_44_P388973  | -0.5011  | -3.16409 | 0.004797 | -1.98686 | NM_012571    | Rn.5819   |
| A_44_P123102  | -0.50115 | -3.33832 | 0.00321  | -1.65107 | NM_001039607 | Rn.116613 |
| A_44_P293438  | -0.50272 | -2.92651 | 0.00823  | -2.4371  | XM_340949    | Rn.105372 |
| A_44_P993382  | -0.50339 | -2.87293 | 0.009282 | -2.53713 | NM_031121    | Rn.35908  |
| A_44_P351490  | -0.50483 | -4.10147 | 0.000536 | -0.15435 | NM_031797    | Rn.3022   |
| A_44_P370213  | -0.50505 | -2.97275 | 0.007415 | -2.3503  | NM_012749    | Rn.144561 |
| A_43_P16583   | -0.50505 | -3.43122 | 0.002588 | -1.47056 | XM_214539    | Rn.106977 |
| A_44_P400520  | -0.50551 | -3.17475 | 0.004681 | -1.96644 | NM_012866    | Rn.1457   |
| A_44_P133464  | -0.51116 | -2.9112  | 0.008518 | -2.46575 |              |           |
| A_43_P23298   | -0.51124 | -3.86426 | 0.000938 | -0.62133 | XM_001079737 | Rn.161833 |
| A_44_P281750  | -0.51157 | -3.20239 | 0.004393 | -1.9134  | XM_237790    | Rn.1344   |
| A_44_P533572  | -0.51184 | -3.29941 | 0.003513 | -1.7264  | AI639343     | Rn.13858  |
| A_44_P292900  | -0.51223 | -2.94967 | 0.007812 | -2.39368 | XM_219377    | Rn.162468 |
| A_44_P340180  | -0.51227 | -2.94135 | 0.00796  | -2.4093  | XM_341668    | Rn.9619   |
| A_44_P1048296 | -0.51255 | -3.08876 | 0.005698 | -2.1307  | NM_172023    | Rn.178664 |
| A_44_P238019  | -0.51394 | -3.07438 | 0.005888 | -2.15807 | AW143671     | Rn.15201  |
| A_43_P21191   | -0.51398 | -3.711   | 0.001345 | -0.92285 | XM_234988    | Rn.99361  |
| A_44_P1034030 | -0.51459 | -2.93789 | 0.008022 | -2.41579 | XM_220420    | Rn.17594  |

|              |          |          |          |          |              |           |
|--------------|----------|----------|----------|----------|--------------|-----------|
| A_44_P290424 | -0.51475 | -3.15403 | 0.004908 | -2.00613 | NM_080905    | Rn.73937  |
| A_44_P461678 | -0.51506 | -3.46513 | 0.002391 | -1.40448 | XM_574677    | Rn.23632  |
| A_44_P363522 | -0.51511 | -3.14014 | 0.005067 | -2.03269 | NM_001031661 | Rn.41210  |
| A_43_P23210  | -0.51525 | -2.92979 | 0.00817  | -2.43096 | NM_001012153 | Rn.14671  |
| A_44_P477633 | -0.51654 | -2.96959 | 0.007468 | -2.35626 | NM_174864    | Rn.51975  |
| A_44_P226906 | -0.51705 | -3.15618 | 0.004884 | -2.00202 | NM_147205    | Rn.54567  |
| A_44_P540279 | -0.5175  | -3.27808 | 0.00369  | -1.76761 | AW144704     | Rn.91572  |
| A_44_P377698 | -0.51802 | -3.17959 | 0.004629 | -1.95717 | XR_006438    | Rn.196722 |
| A_44_P157009 | -0.51818 | -2.90577 | 0.008623 | -2.4759  | XM_232995    | Rn.15969  |
| A_44_P445369 | -0.5182  | -3.13113 | 0.005173 | -2.04992 | XM_001080476 | Rn.178658 |
| A_44_P520929 | -0.51833 | -3.7294  | 0.001288 | -0.88669 | NM_001007675 | Rn.203149 |
| A_44_P208566 | -0.52022 | -3.87786 | 0.000909 | -0.59456 | XM_341567    | Rn.36200  |
| A_44_P301875 | -0.52102 | -3.13858 | 0.005085 | -2.03568 | XM_343761    | Rn.79380  |
| A_43_P10744  | -0.52121 | -2.95779 | 0.00767  | -2.37843 | NM_001014212 | Rn.105523 |
| A_43_P16724  | -0.5214  | -2.91993 | 0.008353 | -2.44943 | NM_001014188 | Rn.25170  |
| A_44_P974892 | -0.52152 | -3.87896 | 0.000906 | -0.59238 |              |           |
| A_43_P18451  | -0.52167 | -2.986   | 0.007196 | -2.32535 | NM_080579    | Rn.99370  |
| A_44_P342730 | -0.5218  | -3.12478 | 0.005248 | -2.06205 | NM_001012275 | Rn.9570   |
| A_44_P362498 | -0.52359 | -2.92854 | 0.008193 | -2.43332 | AW143788     | Rn.7599   |
| A_44_P255678 | -0.52368 | -3.20679 | 0.004349 | -1.90496 | XM_228777    | Rn.61758  |
| A_43_P13675  | -0.5242  | -3.26187 | 0.003831 | -1.7989  | CO570281     | Rn.11891  |
| A_44_P150877 | -0.52545 | -2.92217 | 0.008311 | -2.44524 | XM_001080836 |           |
| A_44_P109834 | -0.52606 | -3.99713 | 0.000686 | -0.35971 | XM_341783    | Rn.100654 |
| A_42_P644929 | -0.52782 | -2.88149 | 0.009106 | -2.52119 | NM_021579    | Rn.159847 |
| A_44_P171155 | -0.52796 | -3.3758  | 0.002943 | -1.57836 | NM_001014221 | Rn.198445 |
| A_44_P142843 | -0.52822 | -3.25062 | 0.003931 | -1.8206  | XM_001065442 | Rn.144456 |
| A_43_P17871  | -0.52907 | -2.93669 | 0.008044 | -2.41804 | NM_001013186 | Rn.153573 |
| A_44_P940553 | -0.52977 | -3.0938  | 0.005633 | -2.12112 | AW143148     |           |
| A_43_P21003  | -0.52993 | -2.84354 | 0.009913 | -2.59172 | NM_001033892 | Rn.98615  |
| A_44_P651694 | -0.53017 | -3.31877 | 0.003359 | -1.68894 |              |           |
| A_44_P776937 | -0.53028 | -3.11071 | 0.00542  | -2.08889 | CR754170     | Rn.200075 |
| A_44_P227201 | -0.53071 | -3.39678 | 0.002803 | -1.53759 | XM_225013    | Rn.99777  |
| A_43_P10797  | -0.53226 | -3.6099  | 0.001705 | -1.12133 | BG666794     | Rn.3027   |
| A_44_P471691 | -0.53234 | -4.40431 | 0.000262 | 0.439495 | XM_223781    | Rn.164613 |
| A_44_P378225 | -0.53263 | -3.26956 | 0.003763 | -1.78406 | NM_001011993 | Rn.40859  |
| A_44_P315714 | -0.53523 | -2.88563 | 0.009022 | -2.51348 | NM_021577    | Rn.64591  |
| A_44_P683068 | -0.53525 | -3.12787 | 0.005211 | -2.05615 | NM_017032    | Rn.95959  |
| A_44_P260055 | -0.53652 | -3.20182 | 0.004399 | -1.9145  | NM_031043    | Rn.3661   |
| A_42_P750029 | -0.53712 | -3.55609 | 0.001934 | -1.22673 | BF559198     | Rn.50843  |
| A_44_P490460 | -0.53724 | -3.60883 | 0.001709 | -1.12341 | XM_224518    | Rn.106438 |
| A_44_P230960 | -0.5381  | -3.08142 | 0.005794 | -2.14468 | AW144271     | Rn.7380   |
| A_44_P415459 | -0.53854 | -2.96777 | 0.007499 | -2.35967 | CB547990     | Rn.161999 |
| A_44_P228874 | -0.53882 | -2.99646 | 0.007028 | -2.30563 | NM_012815    | Rn.8365   |
| A_44_P516073 | -0.53914 | -3.63738 | 0.001599 | -1.06742 | XM_217194    | Rn.23973  |
| A_44_P223808 | -0.54002 | -3.31299 | 0.003404 | -1.70014 | XM_225711    | Rn.195658 |
| A_44_P170338 | -0.54027 | -2.85659 | 0.009628 | -2.56751 | NM_001002815 | Rn.160715 |
| A_44_P485614 | -0.54041 | -3.42581 | 0.00262  | -1.4811  |              |           |
| A_44_P241371 | -0.54044 | -2.97622 | 0.007357 | -2.34377 | NM_001013161 | Rn.8860   |
| A_44_P175543 | -0.54102 | -3.07212 | 0.005918 | -2.16235 | NM_001033699 | Rn.1309   |
| A_44_P579630 | -0.54104 | -2.85254 | 0.009716 | -2.57502 |              |           |
| A_44_P515211 | -0.54129 | -3.11998 | 0.005306 | -2.07121 | NM_145765    | Rn.84873  |
| A_44_P466183 | -0.54131 | -3.02375 | 0.006606 | -2.25407 | NM_133410    | Rn.23625  |
| A_44_P168778 | -0.54181 | -2.91599 | 0.008427 | -2.4568  | XM_233220    | Rn.213735 |
| A_44_P201601 | -0.54268 | -3.00096 | 0.006957 | -2.29713 | XM_216096    | Rn.45039  |
| A_44_P180080 | -0.54313 | -3.37249 | 0.002966 | -1.58478 | NM_022867    | Rn.41412  |
| A_44_P353927 | -0.54317 | -3.39999 | 0.002782 | -1.53135 | XM_341931    | Rn.145190 |
| A_44_P344340 | -0.54321 | -3.02846 | 0.006536 | -2.24516 | U78135       | Rn.198302 |
| A_44_P310949 | -0.54343 | -3.14843 | 0.004972 | -2.01684 | NM_001004283 | Rn.3463   |

|               |          |          |          |          |              |           |
|---------------|----------|----------|----------|----------|--------------|-----------|
| A_43_P12473   | -0.54368 | -3.97258 | 0.000727 | -0.40803 | NM_031006    | Rn.10056  |
| A_44_P207215  | -0.54399 | -3.71816 | 0.001323 | -0.90879 | XM_237115    | Rn.9067   |
| A_44_P281155  | -0.54407 | -2.91962 | 0.008359 | -2.45001 | XM_341127    | Rn.3649   |
| A_44_P323729  | -0.54477 | -3.21994 | 0.004219 | -1.87968 | NM_001042621 | Rn.1836   |
| A_43_P10248   | -0.54491 | -2.97352 | 0.007402 | -2.34885 | NM_001014117 | Rn.34113  |
| A_44_P147622  | -0.54517 | -3.81095 | 0.001064 | -0.72627 | XM_343462    | Rn.36397  |
| A_44_P386375  | -0.54538 | -3.16405 | 0.004797 | -1.98695 | NM_053842    | Rn.34914  |
| A_44_P333232  | -0.54545 | -3.66568 | 0.001496 | -1.01189 | XM_342803    | Rn.11991  |
| A_44_P265326  | -0.54573 | -3.2835  | 0.003644 | -1.75714 | BC087674     | Rn.22763  |
| A_43_P19260   | -0.54602 | -3.23084 | 0.004115 | -1.8587  | XM_001053368 | Rn.155491 |
| A_44_P525101  | -0.54616 | -3.59325 | 0.001773 | -1.15395 | XR_006056    | Rn.157025 |
| A_44_P534508  | -0.54659 | -3.24439 | 0.003988 | -1.83261 | XM_231749    | Rn.204902 |
| A_44_P447514  | -0.54691 | -3.299   | 0.003516 | -1.72718 | NM_017155    | Rn.32078  |
| A_44_P493688  | -0.54701 | -3.60887 | 0.001709 | -1.12333 | NM_001008371 | Rn.162484 |
| A_44_P587322  | -0.54784 | -3.46677 | 0.002382 | -1.40128 | AW917250     |           |
| A_43_P15866   | -0.54831 | -3.51439 | 0.002132 | -1.3083  | XM_341686    | Rn.9446   |
| A_43_P21374   | -0.54873 | -3.25803 | 0.003865 | -1.80631 | NM_001008353 | Rn.8839   |
| A_44_P557474  | -0.54968 | -3.03358 | 0.006461 | -2.23547 | NM_053742    | Rn.2399   |
| A_44_P191022  | -0.54984 | -3.01264 | 0.006775 | -2.27508 | NM_053674    | Rn.7279   |
| A_44_P338068  | -0.55011 | -3.50831 | 0.002162 | -1.32018 | NM_001024355 | Rn.19890  |
| A_44_P331003  | -0.55171 | -3.54098 | 0.002003 | -1.25631 | XM_234281    | Rn.106963 |
| A_44_P222603  | -0.55189 | -3.19846 | 0.004433 | -1.92096 | XM_341580    | Rn.1014   |
| A_44_P995544  | -0.55211 | -3.05489 | 0.006155 | -2.19507 | NM_001039034 | Rn.106818 |
| A_44_P241781  | -0.55211 | -3.1802  | 0.004623 | -1.95599 | BF558420     | Rn.19106  |
| A_44_P228715  | -0.55251 | -4.37986 | 0.000278 | 0.391719 | NM_019275    | Rn.9774   |
| A_44_P803129  | -0.55256 | -3.49264 | 0.002243 | -1.35079 | AW918772     | Rn.204958 |
| A_44_P352104  | -0.55268 | -3.02151 | 0.00664  | -2.2583  | XM_216993    | Rn.94733  |
| A_44_P168083  | -0.55308 | -3.10274 | 0.005519 | -2.10409 | NM_019381    | Rn.107678 |
| A_44_P443228  | -0.55414 | -3.06694 | 0.005989 | -2.17221 | XM_341622    | Rn.92711  |
| A_43_P21031   | -0.55451 | -3.52301 | 0.002089 | -1.29145 | XM_232343    | Rn.14316  |
| A_44_P171128  | -0.55544 | -2.84548 | 0.00987  | -2.58812 | XM_232987    | Rn.98222  |
| A_44_P160550  | -0.55574 | -2.92182 | 0.008317 | -2.44589 | NM_017116    | Rn.6822   |
| A_44_P349689  | -0.55591 | -2.88141 | 0.009107 | -2.52134 | NM_001009831 | Rn.135117 |
| A_44_P550670  | -0.55632 | -3.08033 | 0.005809 | -2.14675 | XM_223611    | Rn.21479  |
| A_44_P454426  | -0.55634 | -3.39767 | 0.002798 | -1.53585 | AF133906     | Rn.202873 |
| A_43_P15280   | -0.5565  | -3.60497 | 0.001725 | -1.13099 | NM_019194    | Rn.59871  |
| A_43_P21715   | -0.55746 | -2.90672 | 0.008605 | -2.47413 | BC091390     | Rn.206833 |
| A_44_P147582  | -0.55818 | -3.22017 | 0.004217 | -1.87922 | NM_001079936 | Rn.3305   |
| A_44_P173345  | -0.5586  | -3.37421 | 0.002954 | -1.58144 | XM_342595    | Rn.198182 |
| A_44_P381483  | -0.55869 | -3.27132 | 0.003748 | -1.78067 | XM_213930    | Rn.203104 |
| A_44_P167403  | -0.55872 | -3.00447 | 0.006902 | -2.29051 | AA875633     | Rn.13589  |
| A_44_P191924  | -0.55935 | -3.06514 | 0.006013 | -2.17562 | NM_019906    | Rn.11008  |
| A_43_P20321   | -0.55979 | -4.06732 | 0.000581 | -0.22154 | XM_228770    | Rn.38478  |
| A_44_P744309  | -0.56059 | -3.1147  | 0.005371 | -2.08128 | XM_222534    | Rn.195555 |
| A_44_P289630  | -0.56239 | -3.13467 | 0.005131 | -2.04316 | NM_017261    | Rn.91361  |
| A_44_P1019326 | -0.56271 | -2.99167 | 0.007105 | -2.31467 | NM_199372    | Rn.91523  |
| A_44_P292479  | -0.56303 | -2.98757 | 0.007171 | -2.3224  | NM_053880    | Rn.11014  |
| A_44_P146833  | -0.56378 | -2.95072 | 0.007793 | -2.39172 | M92076       | Rn.41715  |
| A_44_P284462  | -0.56395 | -3.36363 | 0.003027 | -1.60199 | NM_031728    | Rn.11022  |
| A_44_P529934  | -0.56395 | -2.99514 | 0.007049 | -2.30812 | XM_225661    | Rn.132678 |
| A_43_P16274   | -0.5643  | -3.15864 | 0.004857 | -1.9973  | S53987       |           |
| A_43_P16927   | -0.56431 | -3.27905 | 0.003682 | -1.76575 | XM_228073    | Rn.11702  |
| A_43_P19892   | -0.56484 | -3.205   | 0.004367 | -1.90839 | NM_001014255 | Rn.22786  |
| A_44_P147062  | -0.56493 | -2.92845 | 0.008194 | -2.43348 | XM_220095    | Rn.26552  |
| A_42_P627394  | -0.56496 | -4.06189 | 0.000589 | -0.23223 | BC089998     | Rn.36437  |
| A_44_P299699  | -0.56503 | -3.06735 | 0.005983 | -2.17142 | NM_001013896 | Rn.19940  |
| A_44_P309513  | -0.56612 | -3.32534 | 0.003308 | -1.67622 | NM_001024367 | Rn.140506 |
| A_44_P207634  | -0.5662  | -2.88958 | 0.008942 | -2.50612 | NM_001014148 | Rn.1073   |

|               |          |          |          |          |              |           |
|---------------|----------|----------|----------|----------|--------------|-----------|
| A_44_P618177  | -0.56659 | -3.25823 | 0.003863 | -1.80592 | CF110664     | Rn.16536  |
| A_44_P156805  | -0.56674 | -2.91367 | 0.008471 | -2.46113 | XM_227475    | Rn.103975 |
| A_44_P280759  | -0.56806 | -2.94932 | 0.007818 | -2.39435 | NM_012992    | Rn.54537  |
| A_44_P212355  | -0.56835 | -3.49354 | 0.002238 | -1.34904 | XM_232466    | Rn.32960  |
| A_44_P468544  | -0.56844 | -3.19639 | 0.004454 | -1.92493 | NM_001013126 | Rn.100496 |
| A_44_P738643  | -0.56863 | -3.29295 | 0.003566 | -1.73889 |              |           |
| A_44_P348973  | -0.56889 | -3.01678 | 0.006712 | -2.26725 | NM_001004277 | Rn.93631  |
| A_44_P261883  | -0.56906 | -2.92282 | 0.008299 | -2.44401 | NM_134402    | Rn.13196  |
| A_44_P650648  | -0.57023 | -4.19154 | 0.000434 | 0.022684 | BF561546     | Rn.92969  |
| A_44_P1060064 | -0.57094 | -3.12563 | 0.005238 | -2.06043 | NM_001024883 | Rn.39247  |
| A_44_P409866  | -0.57204 | -3.36268 | 0.003034 | -1.60383 | NM_013221    | Rn.89226  |
| A_44_P347771  | -0.57225 | -3.37072 | 0.002978 | -1.58823 | CB579735     | Rn.171407 |
| A_44_P384688  | -0.57263 | -3.44036 | 0.002533 | -1.45276 |              |           |
| A_44_P356027  | -0.57294 | -2.92043 | 0.008344 | -2.4485  | NM_053642    | Rn.18741  |
| A_44_P249606  | -0.57308 | -2.90444 | 0.008649 | -2.47839 | NM_001025718 | Rn.13772  |
| A_43_P15129   | -0.57378 | -4.36307 | 0.000289 | 0.358901 | BF558849     |           |
| A_44_P137356  | -0.5742  | -2.85938 | 0.009568 | -2.56232 | NM_053523    | Rn.4028   |
| A_44_P550497  | -0.57495 | -3.48169 | 0.002301 | -1.37217 | NM_022684    | Rn.162782 |
| A_44_P365765  | -0.57566 | -3.11654 | 0.005348 | -2.07778 | XM_224579    | Rn.3704   |
| A_44_P190115  | -0.57607 | -3.42078 | 0.002651 | -1.4909  | XM_235940    | Rn.8862   |
| A_43_P19005   | -0.57629 | -2.90927 | 0.008555 | -2.46936 | XM_574285    | Rn.79194  |
| A_44_P229352  | -0.57702 | -3.11145 | 0.005411 | -2.08749 | XM_222717    | Rn.28005  |
| A_44_P729514  | -0.57738 | -2.84434 | 0.009895 | -2.59024 | XM_573199    | Rn.8286   |
| A_44_P130849  | -0.57774 | -2.88796 | 0.008975 | -2.50914 | XM_224627    | Rn.19370  |
| A_44_P534249  | -0.57802 | -2.84357 | 0.009912 | -2.59166 | NM_001013874 | Rn.98296  |
| A_44_P707011  | -0.57859 | -3.34419 | 0.003167 | -1.63969 | CO393635     | Rn.3583   |
| A_42_P747877  | -0.57873 | -3.36184 | 0.00304  | -1.60545 | NM_172029    | Rn.9181   |
| A_44_P101223  | -0.57904 | -3.77967 | 0.001145 | -0.78781 | XM_344744    | Rn.99039  |
| A_44_P246311  | -0.58042 | -3.0232  | 0.006615 | -2.25511 | NM_001017473 | Rn.8249   |
| A_44_P548450  | -0.58071 | -2.96256 | 0.007588 | -2.36947 | XM_225160    | Rn.44057  |
| A_44_P356596  | -0.58119 | -2.91812 | 0.008387 | -2.45281 | XM_342783    | Rn.62095  |
| A_44_P368170  | -0.58179 | -3.62106 | 0.001661 | -1.09945 | XM_342563    | Rn.51809  |
| A_44_P987846  | -0.58185 | -3.03809 | 0.006395 | -2.22692 | XM_001075075 | Rn.17532  |
| A_44_P246554  | -0.582   | -3.26244 | 0.003826 | -1.7978  | CO566833     | Rn.202638 |
| A_44_P463557  | -0.58263 | -3.2119  | 0.004298 | -1.89513 | NM_013067    | Rn.4224   |
| A_44_P231583  | -0.58303 | -2.98095 | 0.007279 | -2.33488 | NM_032462    | Rn.74239  |
| A_44_P130732  | -0.58382 | -3.33593 | 0.003228 | -1.6557  | XM_001064066 | Rn.179747 |
| A_43_P15355   | -0.58468 | -2.99721 | 0.007016 | -2.30421 | NM_130755    | Rn.66581  |
| A_44_P235090  | -0.58628 | -3.07251 | 0.005913 | -2.16161 | XM_234988    | Rn.99361  |
| A_44_P271989  | -0.58637 | -2.86728 | 0.0094   | -2.54764 | XM_345169    | Rn.11634  |
| A_44_P170070  | -0.58651 | -3.24275 | 0.004003 | -1.83576 | XM_236380    | Rn.82537  |
| A_44_P810365  | -0.5868  | -2.87055 | 0.009332 | -2.54156 | CV104092     | Rn.8410   |
| A_44_P382611  | -0.58712 | -2.96243 | 0.00759  | -2.36972 | NM_001031651 | Rn.143886 |
| A_44_P444039  | -0.58729 | -3.00114 | 0.006954 | -2.2968  | XM_215897    | Rn.98236  |
| A_44_P637334  | -0.58783 | -3.14295 | 0.005035 | -2.02733 |              |           |
| A_44_P262569  | -0.58791 | -3.63106 | 0.001623 | -1.07983 | XM_341961    | Rn.137040 |
| A_44_P344730  | -0.58803 | -3.63375 | 0.001613 | -1.07454 | NM_001009405 | Rn.162617 |
| A_44_P103692  | -0.58922 | -2.93733 | 0.008032 | -2.41684 | XM_234484    | Rn.22873  |
| A_44_P698466  | -0.58941 | -2.91385 | 0.008468 | -2.46081 | XM_001062636 | Rn.167797 |
| A_44_P504298  | -0.58951 | -2.94017 | 0.007981 | -2.41152 | XM_221077    | Rn.8595   |
| A_44_P509129  | -0.58977 | -2.87832 | 0.009171 | -2.52709 | BC083806     | Rn.94152  |
| A_42_P744464  | -0.59018 | -3.17585 | 0.004669 | -1.96434 | XM_340740    | Rn.98642  |
| A_43_P17175   | -0.5903  | -3.5954  | 0.001764 | -1.14974 | NM_001031642 | Rn.103402 |
| A_43_P21386   | -0.59044 | -3.17171 | 0.004713 | -1.97227 | CB546740     |           |
| A_43_P11905   | -0.59083 | -3.05051 | 0.006217 | -2.20339 | NM_017303    | Rn.32090  |
| A_44_P471386  | -0.59181 | -2.88997 | 0.008934 | -2.50539 | NM_001013107 | Rn.107901 |
| A_44_P530041  | -0.59218 | -2.96383 | 0.007566 | -2.36709 | XM_343804    | Rn.208476 |
| A_44_P529718  | -0.59257 | -3.81242 | 0.00106  | -0.72338 | XM_341914    | Rn.162461 |

|               |          |          |          |          |              |           |
|---------------|----------|----------|----------|----------|--------------|-----------|
| A_44_P237220  | -0.59259 | -4.39152 | 0.000271 | 0.4145   | XM_214720    | Rn.98912  |
| A_44_P398587  | -0.59283 | -3.0323  | 0.006479 | -2.23789 | XM_343766    | Rn.7273   |
| A_44_P292327  | -0.59331 | -3.03932 | 0.006377 | -2.2246  | NM_017006    | Rn.11040  |
| A_44_P782486  | -0.5935  | -3.29362 | 0.00356  | -1.7376  | XM_575380    | Rn.204577 |
| A_44_P508462  | -0.59352 | -2.8832  | 0.009071 | -2.518   | NM_131911    | Rn.20465  |
| A_44_P222011  | -0.59391 | -3.13405 | 0.005138 | -2.04434 | NM_017343    | Rn.103179 |
| A_44_P312371  | -0.59459 | -3.50097 | 0.0022   | -1.33452 | NM_172066    | Rn.90036  |
| A_43_P21821   | -0.59573 | -3.17816 | 0.004644 | -1.9599  | CB547114     |           |
| A_44_P222353  | -0.59609 | -3.54516 | 0.001984 | -1.24812 | NM_001040128 | Rn.207169 |
| A_44_P217462  | -0.59611 | -3.52564 | 0.002077 | -1.2863  | U78138       |           |
| A_43_P13557   | -0.59734 | -3.37099 | 0.002976 | -1.58769 | CF110620     | Rn.65543  |
| A_44_P226353  | -0.59801 | -3.19841 | 0.004433 | -1.92106 | NM_031672    | Rn.89268  |
| A_44_P438269  | -0.59811 | -3.87659 | 0.000911 | -0.59705 | NM_022585    | Rn.6290   |
| A_44_P1009692 | -0.5983  | -3.21504 | 0.004267 | -1.88909 | NM_001025624 | Rn.3517   |
| A_43_P12191   | -0.59871 | -3.50489 | 0.00218  | -1.32686 | NM_022265    | Rn.206228 |
| A_44_P302996  | -0.59922 | -3.48459 | 0.002285 | -1.36651 | XM_342171    | Rn.137445 |
| A_44_P461489  | -0.59927 | -2.86872 | 0.00937  | -2.54495 | XM_231528    | Rn.91746  |
| A_44_P686863  | -0.59961 | -3.75756 | 0.001206 | -0.83131 |              |           |
| A_43_P18281   | -0.59965 | -4.07866 | 0.000566 | -0.19924 | XM_001057305 | Rn.18063  |
| A_44_P703930  | -0.60001 | -3.46466 | 0.002394 | -1.40539 |              |           |
| A_44_P955997  | -0.60011 | -3.38018 | 0.002913 | -1.56985 | DN932367     | Rn.47341  |
| A_44_P327535  | -0.6004  | -3.66964 | 0.001482 | -1.00409 | XR_007094    | Rn.203188 |
| A_44_P1049827 | -0.60075 | -2.89238 | 0.008886 | -2.50089 | NM_024128    | Rn.2865   |
| A_44_P516958  | -0.60117 | -3.16315 | 0.004807 | -1.98867 | EF076766     | Rn.203841 |
| A_43_P10835   | -0.60123 | -2.90511 | 0.008636 | -2.47713 | BP482727     | Rn.101963 |
| A_44_P823303  | -0.60152 | -3.79252 | 0.001111 | -0.76255 |              |           |
| A_44_P186813  | -0.60233 | -3.18022 | 0.004622 | -1.95597 | XM_213276    | Rn.18711  |
| A_44_P128711  | -0.60233 | -2.90838 | 0.008573 | -2.47103 | XM_217566    | Rn.58623  |
| A_43_P18294   | -0.60239 | -3.91961 | 0.000823 | -0.51235 | BC099835     | Rn.134218 |
| A_44_P326176  | -0.60268 | -3.09586 | 0.005607 | -2.1172  | XM_222244    | Rn.207591 |
| A_44_P217909  | -0.60295 | -3.43241 | 0.002581 | -1.46825 | XM_228644    | Rn.18311  |
| A_44_P851961  | -0.60325 | -2.87498 | 0.00924  | -2.53332 | NM_001009504 | Rn.214871 |
| A_44_P325189  | -0.60366 | -4.06665 | 0.000582 | -0.22286 | NM_175578    | Rn.24428  |
| A_44_P789739  | -0.60378 | -3.50519 | 0.002178 | -1.32628 | NM_001030024 | Rn.19386  |
| A_42_P688027  | -0.60651 | -3.11857 | 0.005323 | -2.0739  | NM_030999    | Rn.10499  |
| A_44_P114298  | -0.60651 | -3.38942 | 0.002852 | -1.55189 | XM_215693    | Rn.7301   |
| A_44_P344096  | -0.60691 | -2.86739 | 0.009398 | -2.54744 | NM_138890    | Rn.7771   |
| A_43_P10536   | -0.60796 | -2.9444  | 0.007905 | -2.40357 | XR_007603    | Rn.34413  |
| A_44_P917935  | -0.60799 | -2.95671 | 0.007689 | -2.38047 |              |           |
| A_44_P377653  | -0.60836 | -3.65253 | 0.001543 | -1.03769 |              |           |
| A_43_P17872   | -0.60838 | -3.01364 | 0.006759 | -2.27318 | CB545618     | Rn.128947 |
| A_44_P142318  | -0.60841 | -3.00995 | 0.006816 | -2.28015 | XM_222171    | Rn.162124 |
| A_44_P400936  | -0.60866 | -3.02171 | 0.006637 | -2.25793 | XR_006350    | Rn.196876 |
| A_44_P735345  | -0.6091  | -3.63084 | 0.001624 | -1.08026 | XM_576015    | Rn.16708  |
| A_44_P495832  | -0.6102  | -3.6337  | 0.001613 | -1.07465 | XM_343442    | Rn.24236  |
| A_44_P356711  | -0.61056 | -3.05191 | 0.006197 | -2.20073 | XM_343094    | Rn.64438  |
| A_44_P702685  | -0.61115 | -3.01591 | 0.006725 | -2.2689  | CO402564     | Rn.127735 |
| A_43_P18909   | -0.61132 | -3.04512 | 0.006293 | -2.21361 | XM_236648    | Rn.53471  |
| A_44_P809536  | -0.61165 | -3.41439 | 0.002691 | -1.50333 | AW144200     | Rn.7037   |
| A_44_P475932  | -0.61234 | -2.91548 | 0.008437 | -2.45775 | NM_001037496 | Rn.97794  |
| A_44_P465188  | -0.61384 | -3.06277 | 0.006046 | -2.18012 | NM_053445    | Rn.28161  |
| A_44_P192018  | -0.61388 | -4.13581 | 0.000494 | -0.08684 |              |           |
| A_44_P354806  | -0.6145  | -3.10653 | 0.005472 | -2.09686 | NM_172072    | Rn.9316   |
| A_44_P477135  | -0.61523 | -3.41577 | 0.002682 | -1.50064 | NM_052801    | Rn.11059  |
| A_44_P513246  | -0.61532 | -3.22288 | 0.004191 | -1.87402 | XM_341091    | Rn.137498 |
| A_44_P348983  | -0.61597 | -2.9451  | 0.007893 | -2.40226 | XM_340889    | Rn.12214  |
| A_44_P671422  | -0.61639 | -3.22546 | 0.004166 | -1.86906 |              |           |
| A_43_P18993   | -0.61667 | -2.95805 | 0.007665 | -2.37796 | XM_216679    | Rn.48387  |

|               |           |          |          |          |              |           |
|---------------|-----------|----------|----------|----------|--------------|-----------|
| A_44_P261179  | -0.61674  | -3.75183 | 0.001222 | -0.84258 | XM_343177    | Rn.41593  |
| A_44_P384223  | -0.61722  | -3.30717 | 0.00345  | -1.71139 | NM_024151    | Rn.35935  |
| A_44_P358664  | -0.61725  | -2.8855  | 0.009024 | -2.51372 | XM_223454    | Rn.162277 |
| A_44_P418824  | -0.61742  | -3.61845 | 0.001671 | -1.10456 | NM_053430    | Rn.16664  |
| A_44_P253196  | -0.61787  | -3.57781 | 0.001838 | -1.1842  | XM_228114    | Rn.204911 |
| A_43_P18795   | -0.61804  | -2.92636 | 0.008233 | -2.43738 | NM_001047849 | Rn.6835   |
| A_44_P108680  | -0.61847  | -3.48234 | 0.002297 | -1.37089 | NM_057116    | Rn.54550  |
| A_44_P396772  | -0.61934  | -3.7538  | 0.001217 | -0.83871 | NM_001037363 | Rn.96330  |
| A_44_P457129  | -0.61955  | -3.00071 | 0.006961 | -2.2976  | XM_227809    | Rn.198185 |
| A_44_P301812  | -0.61984  | -3.24171 | 0.004013 | -1.83777 | NM_001005765 | Rn.106321 |
| A_44_P183048  | -0.62005  | -3.44636 | 0.002498 | -1.44107 | XM_233467    | Rn.162834 |
| A_44_P199358  | -0.6203   | -2.94943 | 0.007816 | -2.39414 | XM_229162    |           |
| A_43_P12127   | -0.62081  | -3.05431 | 0.006163 | -2.19617 | NM_021842    | Rn.27154  |
| A_44_P526729  | -0.62244  | -3.0417  | 0.006342 | -2.22008 | NM_031135    | Rn.2398   |
| A_44_P240973  | -0.62249  | -3.90138 | 0.00086  | -0.54824 | NM_022264    | Rn.54004  |
| A_44_P370761  | -0.62259  | -3.28713 | 0.003614 | -1.75013 | XM_236009    | Rn.96240  |
| A_44_P135944  | -0.62263  | -2.90869 | 0.008567 | -2.47045 | XM_220178    | Rn.162033 |
| A_44_P396198  | -0.62327  | -3.02282 | 0.00662  | -2.25583 | NM_001025421 | Rn.203134 |
| A_44_P400884  | -0.62356  | -3.20606 | 0.004356 | -1.90635 | XM_345073    |           |
| A_44_P552986  | -0.6238   | -3.46457 | 0.002394 | -1.40556 | NM_001007693 | Rn.162477 |
| A_44_P523016  | -0.62391  | -2.86862 | 0.009372 | -2.54514 | NM_001024314 | Rn.128955 |
| A_44_P1024729 | -0.62396  | -3.78055 | 0.001142 | -0.78609 | XR_006336    | Rn.24932  |
| A_44_P303777  | -0.62401  | -3.11804 | 0.00533  | -2.07491 | AW143533     | Rn.98831  |
| A_44_P271625  | -0.62466  | -3.41883 | 0.002663 | -1.49469 | NM_053291    | Rn.108127 |
| A_43_P17160   | -0.62594  | -2.95723 | 0.00768  | -2.3795  | NM_001017383 | Rn.22468  |
| A_44_P469040  | -0.62652  | -3.78657 | 0.001126 | -0.77425 | XM_235547    | Rn.36745  |
| A_44_P917437  | -0.62664  | -3.44398 | 0.002512 | -1.4457  |              |           |
| A_44_P548203  | -0.62671  | -3.06936 | 0.005956 | -2.1676  | BC087677     | Rn.18057  |
| A_44_P293124  | -0.62819  | -2.88076 | 0.009121 | -2.52256 | NM_001044243 | Rn.22314  |
| A_44_P321359  | -0.62827  | -3.04759 | 0.006258 | -2.20892 | XM_226455    | Rn.213190 |
| A_44_P779609  | -0.6288   | -3.7657  | 0.001183 | -0.81531 | NM_001037652 | Rn.19409  |
| A_44_P171183  | -0.6293   | -3.37775 | 0.00293  | -1.57456 | NM_001044267 | Rn.7910   |
| A_43_P13046   | -0.62963  | -3.65917 | 0.001519 | -1.02466 | NM_057147    | Rn.34191  |
| A_44_P318999  | -0.62973  | -2.91329 | 0.008478 | -2.46184 |              |           |
| A_43_P10386   | -0.63022  | -4.11636 | 0.000518 | -0.12509 | CA511607     | Rn.96943  |
| A_44_P192548  | -0.63034  | -3.57658 | 0.001843 | -1.18662 | XM_343535    | Rn.3595   |
| A_44_P494723  | -0.6305   | -2.86557 | 0.009436 | -2.55082 | XM_343716    |           |
| A_44_P262192  | -0.63125  | -2.85725 | 0.009614 | -2.56629 | NM_182814    | Rn.97889  |
| A_44_P240248  | -0.63219  | -3.34634 | 0.003151 | -1.63553 | AB012232     | Rn.40435  |
| A_44_P492268  | -0.63219  | -3.03368 | 0.006459 | -2.23527 | XM_212982    |           |
| A_44_P403084  | -0.63229  | -3.77737 | 0.001151 | -0.79235 | NM_001039044 | Rn.111901 |
| A_44_P461807  | -0.6327   | -4.1281  | 0.000504 | -0.10199 | XM_229225    | Rn.139712 |
| A_44_P348825  | -0.63298  | -3.27325 | 0.003731 | -1.77694 | NM_024150    | Rn.62175  |
| A_44_P398014  | -0.63313  | -3.13731 | 0.0051   | -2.03811 | NM_053448    | Rn.17284  |
| A_44_P527134  | -0.63402  | -2.96823 | 0.007491 | -2.35881 | BC081744     | Rn.4252   |
| A_44_P191962  | -0.63406  | -3.09882 | 0.005569 | -2.11155 | NM_001007734 | Rn.4220   |
| A_43_P19178   | -0.63417  | -3.81515 | 0.001053 | -0.718   | NM_031574    | Rn.23055  |
| A_44_P400857  | -0.63445  | -3.02525 | 0.006584 | -2.25123 | NM_001011926 | Rn.201686 |
| A_43_P13362   | -0.63472  | -3.00067 | 0.006961 | -2.29769 | NM_139094    | Rn.10529  |
| A_44_P908874  | -0.63479  | -3.3134  | 0.003401 | -1.69933 |              |           |
| A_44_P112488  | -0.63547  | -3.011   | 0.0068   | -2.27818 | XM_343087    | Rn.40168  |
| A_44_P454180  | -0.63552  | -3.31439 | 0.003393 | -1.69742 | NM_182675    | Rn.2496   |
| A_44_P288548  | -0.63558  | -3.18014 | 0.004623 | -1.95612 | XR_008866    | Rn.14163  |
| A_44_P139291  | -0.63599  | -3.59259 | 0.001776 | -1.15524 | XM_001058939 | Rn.153570 |
| A_44_P791631  | -0.636117 | -3.35283 | 0.003104 | -1.62293 | XM_227139    | Rn.11681  |
| A_44_P473472  | -0.63614  | -3.2489  | 0.003947 | -1.82391 | BC091233     | Rn.9497   |
| A_44_P760606  | -0.63755  | -3.49997 | 0.002205 | -1.33648 | XR_007237    | Rn.197475 |
| A_42_P521902  | -0.63773  | -3.92036 | 0.000822 | -0.51086 | NM_001079941 | Rn.95230  |



|               |          |          |          |          |              |           |
|---------------|----------|----------|----------|----------|--------------|-----------|
| A_44_P345101  | -0.63791 | -3.08645 | 0.005728 | -2.1351  | XM_217367    | Rn.204758 |
| A_44_P178179  | -0.63841 | -2.9104  | 0.008534 | -2.46725 | XM_226561    | Rn.23325  |
| A_44_P508750  | -0.63843 | -3.16079 | 0.004833 | -1.9932  | XM_001056358 | Rn.155456 |
| A_42_P707937  | -0.63908 | -4.18089 | 0.000445 | 0.00175  | NM_080583    | Rn.56138  |
| A_44_P1007105 | -0.63928 | -3.20662 | 0.00435  | -1.90528 | NM_138905    | Rn.12038  |
| A_43_P22124   | -0.63968 | -3.16554 | 0.004781 | -1.98409 | NM_213625    | Rn.92155  |
| A_44_P859113  | -0.64021 | -3.1886  | 0.004534 | -1.93988 | NM_199463    | Rn.32539  |
| A_44_P148695  | -0.64055 | -3.87671 | 0.000911 | -0.59683 | XM_240915    | Rn.64258  |
| A_43_P12462   | -0.64129 | -3.49666 | 0.002222 | -1.34294 | NM_030863    | Rn.2762   |
| A_44_P383199  | -0.64138 | -3.4322  | 0.002582 | -1.46866 | XM_214649    | Rn.12969  |
| A_44_P267595  | -0.64173 | -2.97495 | 0.007378 | -2.34616 | XM_233839    | Rn.22926  |
| A_44_P323882  | -0.642   | -3.33145 | 0.003262 | -1.66439 | NM_001013073 | Rn.48897  |
| A_44_P477889  | -0.64209 | -3.19738 | 0.004444 | -1.92303 | NM_031783    | Rn.18568  |
| A_44_P523112  | -0.64314 | -3.30012 | 0.003507 | -1.72502 | XM_232937    | Rn.154631 |
| A_44_P840751  | -0.64365 | -3.55707 | 0.00193  | -1.22482 |              |           |
| A_43_P11938   | -0.64367 | -2.98574 | 0.0072   | -2.32583 | NM_017364    | Rn.98773  |
| A_44_P340839  | -0.64374 | -3.18645 | 0.004557 | -1.944   | XM_001055446 | Rn.19439  |
| A_43_P17983   | -0.64498 | -3.02279 | 0.006621 | -2.2559  | XM_342679    | Rn.68078  |
| A_44_P1054864 | -0.64518 | -3.48096 | 0.002305 | -1.37359 | NM_001007662 | Rn.2185   |
| A_44_P825644  | -0.64519 | -3.27638 | 0.003705 | -1.7709  |              |           |
| A_44_P369701  | -0.64608 | -3.33381 | 0.003244 | -1.65981 | NM_001025660 | Rn.6593   |
| A_44_P152395  | -0.64643 | -2.89866 | 0.008762 | -2.48917 | NM_001013222 | Rn.198250 |
| A_44_P365882  | -0.64695 | -3.24269 | 0.004004 | -1.83588 | NM_001014046 | Rn.18772  |
| A_44_P177678  | -0.64722 | -2.99464 | 0.007057 | -2.30906 | CB547239     | Rn.205856 |
| A_44_P375613  | -0.64727 | -3.01873 | 0.006682 | -2.26356 | NM_001013183 | Rn.14772  |
| A_44_P235336  | -0.64853 | -3.54983 | 0.001962 | -1.23899 | NM_001083966 | Rn.8189   |
| A_44_P438478  | -0.64857 | -2.84789 | 0.009817 | -2.58366 | XR_006258    | Rn.197053 |
| A_44_P523924  | -0.64863 | -2.89466 | 0.008841 | -2.49664 | NM_001007689 | Rn.1274   |
| A_44_P449969  | -0.64889 | -3.7702  | 0.001171 | -0.80646 | NM_001009258 | Rn.15515  |
| A_43_P17172   | -0.64899 | -4.24465 | 0.000382 | 0.12693  | XM_213385    | Rn.106432 |
| A_44_P514539  | -0.64943 | -3.06895 | 0.005961 | -2.16837 | NM_001008324 | Rn.95954  |
| A_44_P442941  | -0.64956 | -3.2948  | 0.00355  | -1.73531 | NM_032067    | Rn.7107   |
| A_43_P18744   | -0.65011 | -3.42375 | 0.002633 | -1.48511 | NM_001012744 | Rn.198838 |
| A_44_P443343  | -0.65059 | -3.64924 | 0.001555 | -1.04416 | XM_216091    | Rn.18101  |
| A_44_P137262  | -0.65064 | -3.24492 | 0.003983 | -1.83158 | NM_148891    | Rn.830    |
| A_44_P366056  | -0.6509  | -3.71162 | 0.001343 | -0.92163 | XM_233418    | Rn.162094 |
| A_44_P395709  | -0.6513  | -3.10766 | 0.005458 | -2.0947  | NM_134366    | Rn.29157  |
| A_44_P422063  | -0.65167 | -3.03302 | 0.006469 | -2.23652 | XM_228173    | Rn.27865  |
| A_43_P17344   | -0.65206 | -3.6268  | 0.001639 | -1.08818 | XM_232252    | Rn.103700 |
| A_44_P555261  | -0.65208 | -2.8993  | 0.008749 | -2.48799 | NM_031057    | Rn.2098   |
| A_43_P12591   | -0.65239 | -4.09578 | 0.000543 | -0.16555 | NM_031569    | Rn.9762   |
| A_44_P441434  | -0.6525  | -3.29659 | 0.003536 | -1.73185 | NM_131914    | Rn.81070  |
| A_44_P248111  | -0.65291 | -3.16463 | 0.004791 | -1.98584 | NM_001047107 | Rn.198138 |
| A_44_P794608  | -0.65716 | -2.88473 | 0.00904  | -2.51516 | AI112975     | Rn.166643 |
| A_44_P594969  | -0.65741 | -4.05414 | 0.0006   | -0.24748 |              |           |
| A_43_P18497   | -0.65771 | -3.58089 | 0.001825 | -1.17817 | NM_001007609 | Rn.163119 |
| A_43_P13344   | -0.65785 | -2.9207  | 0.008338 | -2.44799 | NM_138976    | Rn.160939 |
| A_44_P272294  | -0.65802 | -3.85068 | 0.000969 | -0.64807 | XM_233937    | Rn.153991 |
| A_44_P255341  | -0.65803 | -3.27778 | 0.003693 | -1.76819 | XM_222661    | Rn.198415 |
| A_44_P342314  | -0.65816 | -2.87154 | 0.009311 | -2.53971 | NM_001014232 | Rn.8173   |
| A_43_P18271   | -0.65821 | -3.09993 | 0.005555 | -2.10943 | XM_576264    | Rn.99794  |
| A_44_P466827  | -0.6585  | -2.98158 | 0.007269 | -2.33369 | NM_001034835 | Rn.34623  |
| A_44_P233867  | -0.659   | -3.29424 | 0.003555 | -1.7364  | NM_172067    | Rn.7546   |
| A_44_P1007438 | -0.65937 | -3.23016 | 0.004121 | -1.86001 | NM_001044238 | Rn.138410 |
| A_44_P215210  | -0.65958 | -3.21472 | 0.00427  | -1.8897  | XM_342568    | Rn.198665 |
| A_44_P166216  | -0.65964 | -3.20287 | 0.004388 | -1.91248 | NM_001013059 | Rn.59254  |
| A_44_P886861  | -0.65992 | -3.45001 | 0.002477 | -1.43395 | NM_001024245 | Rn.154291 |
| A_44_P170710  | -0.66004 | -2.94659 | 0.007866 | -2.39947 | NM_013060    | Rn.3272   |

|               |          |          |          |          |              |           |
|---------------|----------|----------|----------|----------|--------------|-----------|
| A_44_P344397  | -0.66131 | -2.96792 | 0.007497 | -2.3594  | NM_001024233 | Rn.7405   |
| A_43_P17012   | -0.66174 | -3.26322 | 0.003819 | -1.7963  | NM_001014227 | Rn.24630  |
| A_44_P667977  | -0.66311 | -3.18193 | 0.004604 | -1.95268 | XR_007894    | Rn.216140 |
| A_44_P902742  | -0.66332 | -3.81164 | 0.001062 | -0.72491 | XM_343576    | Rn.8070   |
| A_42_P826202  | -0.66357 | -3.00449 | 0.006901 | -2.29047 | NM_153732    | Rn.64641  |
| A_44_P147702  | -0.66364 | -3.29206 | 0.003573 | -1.74061 | XM_340853    | Rn.145141 |
| A_43_P12487   | -0.66408 | -3.57566 | 0.001847 | -1.18842 | NM_031040    | Rn.10409  |
| A_44_P324042  | -0.6641  | -3.21721 | 0.004246 | -1.88492 | NM_001034150 | Rn.18349  |
| A_44_P477927  | -0.66518 | -3.33075 | 0.003267 | -1.66574 | NM_013225    | Rn.10644  |
| A_44_P1026688 | -0.66549 | -3.03185 | 0.006486 | -2.23875 | NM_001014263 | Rn.17193  |
| A_44_P552977  | -0.66572 | -3.28585 | 0.003625 | -1.75261 | NM_001007693 | Rn.162477 |
| A_44_P175751  | -0.66592 | -3.05042 | 0.006218 | -2.20356 | XR_009314    | Rn.137473 |
| A_44_P352268  | -0.666   | -4.14352 | 0.000486 | -0.07168 | NM_031821    | Rn.12100  |
| A_44_P241439  | -0.66602 | -3.28469 | 0.003634 | -1.75485 | NM_001024789 | Rn.43670  |
| A_44_P288691  | -0.66628 | -2.91154 | 0.008512 | -2.46511 |              |           |
| A_44_P475371  | -0.66667 | -3.21003 | 0.004316 | -1.89873 | XM_342812    | Rn.106758 |
| A_44_P334195  | -0.66668 | -3.24699 | 0.003964 | -1.8276  | NM_001007624 | Rn.98697  |
| A_44_P175461  | -0.66704 | -3.57929 | 0.001832 | -1.18131 | XM_239761    | Rn.22866  |
| A_43_P12936   | -0.66754 | -2.87059 | 0.009331 | -2.54149 | NM_053801    | Rn.46850  |
| A_44_P485453  | -0.66763 | -2.89374 | 0.008859 | -2.49835 | XM_001063164 |           |
| A_44_P744519  | -0.66792 | -4.19457 | 0.00043  | 0.028632 | NM_012992    | Rn.54537  |
| A_42_P654739  | -0.66826 | -3.25711 | 0.003873 | -1.80808 | XM_221888    | Rn.53030  |
| A_44_P208880  | -0.6684  | -3.03326 | 0.006465 | -2.23608 | NM_001038595 | Rn.198254 |
| A_44_P476107  | -0.66859 | -3.30152 | 0.003496 | -1.72232 | XM_217278    |           |
| A_44_P217590  | -0.66867 | -3.97294 | 0.000726 | -0.40733 | NM_053794    | Rn.27409  |
| A_44_P199661  | -0.66944 | -3.01763 | 0.006699 | -2.26564 | XM_341464    | Rn.1987   |
| A_44_P632544  | -0.66951 | -3.08227 | 0.005783 | -2.14306 | AA944304     | Rn.22753  |
| A_44_P231556  | -0.66977 | -4.01993 | 0.00065  | -0.31481 | NM_001077589 | Rn.202892 |
| A_44_P658594  | -0.67014 | -4.42073 | 0.000253 | 0.471549 | CO575464     | Rn.13909  |
| A_44_P269596  | -0.6713  | -3.05342 | 0.006176 | -2.19787 | XM_344976    | Rn.16918  |
| A_44_P328302  | -0.67259 | -3.41861 | 0.002665 | -1.49513 | XM_213992    | Rn.44333  |
| A_44_P473322  | -0.67266 | -3.06011 | 0.006082 | -2.18516 | XM_224778    |           |
| A_44_P293944  | -0.67267 | -2.95414 | 0.007733 | -2.3853  | NM_001005908 | Rn.98375  |
| A_44_P775787  | -0.67334 | -3.84582 | 0.00098  | -0.65763 | XM_575783    | Rn.9543   |
| A_44_P281959  | -0.6734  | -3.84436 | 0.000983 | -0.66052 | XM_218006    | Rn.2666   |
| A_44_P421391  | -0.67373 | -2.90785 | 0.008583 | -2.47202 | NM_198763    | Rn.214724 |
| A_44_P414757  | -0.6745  | -3.1099  | 0.00543  | -2.09044 | NM_001024770 | Rn.204678 |
| A_44_P521893  | -0.67463 | -3.16286 | 0.00481  | -1.98922 | BG669130     | Rn.107945 |
| A_43_P11734   | -0.67487 | -2.90785 | 0.008583 | -2.47201 | NM_013145    | Rn.11391  |
| A_42_P814410  | -0.67517 | -2.9877  | 0.007169 | -2.32214 | NM_212500    | Rn.35325  |
| A_44_P175681  | -0.6754  | -3.1213  | 0.00529  | -2.06868 | NM_001014011 | Rn.53932  |
| A_44_P492635  | -0.67561 | -3.10728 | 0.005462 | -2.09543 | NM_001008281 | Rn.101332 |
| A_44_P243102  | -0.67704 | -2.92309 | 0.008294 | -2.44351 | NM_017007    | Rn.91245  |
| A_44_P172941  | -0.67789 | -3.05037 | 0.006219 | -2.20364 | NM_182821    | Rn.86175  |
| A_43_P20530   | -0.67809 | -3.06014 | 0.006082 | -2.18511 | XM_231400    | Rn.203614 |
| A_44_P482200  | -0.67851 | -3.31217 | 0.003411 | -1.70172 | XM_222785    | Rn.28132  |
| A_44_P112546  | -0.67921 | -2.88545 | 0.009026 | -2.51382 | CO400633     | Rn.45933  |
| A_44_P182555  | -0.68121 | -2.90844 | 0.008571 | -2.4709  | NM_138509    | Rn.7652   |
| A_44_P375322  | -0.68151 | -2.91478 | 0.00845  | -2.45907 | XM_001074519 | Rn.100109 |
| A_44_P338095  | -0.6816  | -3.16288 | 0.00481  | -1.98919 | NM_001013112 | Rn.8745   |
| A_44_P525482  | -0.68227 | -3.13366 | 0.005143 | -2.04508 | CB546704     | Rn.110783 |
| A_44_P300612  | -0.68367 | -3.20786 | 0.004338 | -1.9029  | NM_022850    | Rn.10076  |
| A_42_P712718  | -0.68384 | -3.08844 | 0.005702 | -2.13131 | NM_001004280 | Rn.3269   |
| A_43_P19662   | -0.68386 | -3.23572 | 0.004069 | -1.8493  | CB547048     | Rn.11982  |
| A_44_P121457  | -0.68392 | -3.20492 | 0.004367 | -1.90854 | NM_001037778 | Rn.25812  |
| A_44_P340490  | -0.68409 | -3.11358 | 0.005384 | -2.08342 | XM_221232    | Rn.198882 |
| A_44_P104679  | -0.68485 | -3.08117 | 0.005798 | -2.14515 | NM_053481    | Rn.44268  |
| A_43_P18706   | -0.6849  | -3.24369 | 0.003995 | -1.83396 | NM_001012103 | Rn.4118   |

|              |          |          |          |          |              |           |
|--------------|----------|----------|----------|----------|--------------|-----------|
| A_44_P686038 | -0.68623 | -4.12732 | 0.000504 | -0.10352 | NM_022198    | Rn.44406  |
| A_44_P509099 | -0.68629 | -3.26147 | 0.003834 | -1.79967 | NM_001008382 | Rn.203142 |
| A_44_P248598 | -0.68654 | -5.19967 | 4.10E-05 | 1.963993 | NM_001017459 | Rn.162942 |
| A_44_P332041 | -0.68664 | -2.84127 | 0.009963 | -2.59593 | NM_022385    | Rn.3065   |
| A_44_P525827 | -0.68677 | -3.24407 | 0.003991 | -1.83322 | NM_199091    | Rn.203147 |
| A_44_P324066 | -0.68706 | -3.24282 | 0.004003 | -1.83563 | XM_001072853 | Rn.8212   |
| A_44_P149734 | -0.68795 | -3.11878 | 0.005321 | -2.0735  | NM_001009657 | Rn.139751 |
| A_44_P466041 | -0.68804 | -3.64423 | 0.001573 | -1.05397 | NM_001007682 | Rn.163276 |
| A_43_P11763  | -0.68995 | -3.65196 | 0.001545 | -1.0388  | Z49081       | Rn.5788   |
| A_44_P466565 | -0.69036 | -3.12991 | 0.005187 | -2.05224 | XM_001058018 | Rn.108042 |
| A_44_P959355 | -0.69051 | -3.60627 | 0.00172  | -1.12845 | XR_008469    | Rn.196073 |
| A_44_P636077 | -0.69106 | -3.53297 | 0.002041 | -1.27198 | XM_225093    | Rn.204848 |
| A_44_P192568 | -0.69135 | -3.13713 | 0.005102 | -2.03846 | NM_172335    | Rn.98783  |
| A_44_P321605 | -0.69153 | -2.84277 | 0.00993  | -2.59314 | XM_576504    |           |
| A_44_P715184 | -0.69258 | -3.30086 | 0.003501 | -1.72359 | XM_215883    | Rn.41581  |
| A_44_P557979 | -0.69268 | -3.5054  | 0.002177 | -1.32586 | NM_001012190 | Rn.98217  |
| A_44_P285741 | -0.69275 | -2.84028 | 0.009985 | -2.59777 | NM_031556    | Rn.22518  |
| A_44_P128629 | -0.69321 | -3.00767 | 0.006852 | -2.28447 | XM_344744    | Rn.99039  |
| A_43_P18261  | -0.6933  | -3.51756 | 0.002116 | -1.30209 | NM_001008345 | Rn.41045  |
| A_44_P356538 | -0.69375 | -3.48274 | 0.002295 | -1.37011 | XM_341666    | Rn.137414 |
| A_43_P16735  | -0.69432 | -2.9709  | 0.007446 | -2.35379 | XM_340886    | Rn.21931  |
| A_44_P426707 | -0.69439 | -2.84496 | 0.009882 | -2.5891  | XM_001053199 |           |
| A_44_P370502 | -0.69542 | -2.84442 | 0.009894 | -2.5901  | XM_342445    | Rn.214587 |
| A_44_P516017 | -0.69597 | -3.02013 | 0.006661 | -2.26093 | NM_001031648 | Rn.92713  |
| A_44_P234362 | -0.69624 | -4.21969 | 0.000406 | 0.077943 | NM_001007745 | Rn.15201  |
| A_44_P781559 | -0.69644 | -3.06049 | 0.006077 | -2.18444 | XM_233944    | Rn.165307 |
| A_44_P543350 | -0.69678 | -4.25814 | 0.00037  | 0.153383 | NM_017063    | Rn.11061  |
| A_44_P371823 | -0.69746 | -3.06606 | 0.006001 | -2.17387 | XM_242940    | Rn.23309  |
| A_44_P471818 | -0.69774 | -3.29467 | 0.003551 | -1.73557 | XM_001071384 | Rn.199044 |
| A_44_P405679 | -0.69778 | -2.87125 | 0.009317 | -2.54026 | XM_233609    | Rn.18036  |
| A_43_P16946  | -0.69781 | -2.98551 | 0.007204 | -2.32628 | XM_213649    | Rn.105738 |
| A_44_P509473 | -0.6985  | -3.14203 | 0.005045 | -2.02908 | NM_139060    | Rn.8046   |
| A_44_P503673 | -0.69915 | -3.06187 | 0.006058 | -2.18183 | XM_341100    | Rn.24509  |
| A_44_P386748 | -0.70208 | -2.87533 | 0.009233 | -2.53267 | NM_001007616 | Rn.4063   |
| A_43_P20777  | -0.70238 | -2.87859 | 0.009165 | -2.5266  | XM_341474    | Rn.27691  |
| A_43_P15781  | -0.70269 | -2.84183 | 0.009951 | -2.59489 | BC090029     | Rn.90191  |
| A_44_P345009 | -0.70403 | -3.01838 | 0.006687 | -2.26423 | NM_001008526 | Rn.76368  |
| A_43_P16640  | -0.70418 | -3.03733 | 0.006406 | -2.22837 | XM_343298    | Rn.4204   |
| A_44_P822082 | -0.70432 | -3.16733 | 0.004761 | -1.98067 | XR_009104    | Rn.2946   |
| A_44_P648671 | -0.70677 | -3.03278 | 0.006472 | -2.23699 | XM_001076507 | Rn.45013  |
| A_44_P928907 | -0.7069  | -4.03553 | 0.000626 | -0.2841  | XM_574241    | Rn.215820 |
| A_44_P229079 | -0.70706 | -3.30973 | 0.00343  | -1.70644 | XM_344434    | Rn.55115  |
| A_44_P510470 | -0.70706 | -2.91863 | 0.008377 | -2.45186 | NM_053487    | Rn.14519  |
| A_44_P278923 | -0.70774 | -5.03147 | 6.05E-05 | 1.64738  | XM_224623    | Rn.3785   |
| A_44_P132822 | -0.70776 | -3.82244 | 0.001035 | -0.70366 | NM_001005265 | Rn.5825   |
| A_44_P110098 | -0.70832 | -3.78825 | 0.001122 | -0.77093 | NM_001080783 | Rn.46305  |
| A_44_P260850 | -0.70843 | -3.20167 | 0.0044   | -1.91479 | CO394432     | Rn.202175 |
| A_44_P206520 | -0.70932 | -3.22865 | 0.004135 | -1.86292 | XM_217385    | Rn.102571 |
| A_44_P429364 | -0.71011 | -3.87808 | 0.000908 | -0.59411 | NM_001012113 | Rn.203301 |
| A_44_P135339 | -0.71013 | -3.38129 | 0.002906 | -1.56768 | NM_175761    | Rn.119867 |
| A_44_P459851 | -0.71035 | -3.73373 | 0.001275 | -0.87818 | XM_340974    | Rn.84362  |
| A_44_P442873 | -0.71044 | -4.17651 | 0.000449 | -0.00684 | NM_053739    | Rn.2776   |
| A_44_P535400 | -0.71076 | -2.89118 | 0.00891  | -2.50313 | AW916612     | Rn.101953 |
| A_44_P463996 | -0.7109  | -3.91058 | 0.000841 | -0.53013 | XM_344971    | Rn.201738 |
| A_44_P637889 | -0.71114 | -3.74526 | 0.001241 | -0.85551 |              |           |
| A_44_P271368 | -0.71186 | -3.16018 | 0.00484  | -1.99436 | AW917142     | Rn.12035  |
| A_44_P494644 | -0.71248 | -3.00452 | 0.006901 | -2.29042 | NM_001012075 | Rn.161747 |
| A_44_P365653 | -0.71364 | -3.09375 | 0.005634 | -2.12121 | NM_001014161 | Rn.3490   |

|              |          |          |          |          |              |           |
|--------------|----------|----------|----------|----------|--------------|-----------|
| A_44_P222779 | -0.71394 | -4.11081 | 0.000525 | -0.13599 | XM_342937    | Rn.27338  |
| A_44_P543288 | -0.71455 | -3.3429  | 0.003176 | -1.64219 | NM_031704    | Rn.5782   |
| A_42_P724600 | -0.71565 | -3.24569 | 0.003976 | -1.83009 | NM_001006976 | Rn.22757  |
| A_44_P281540 | -0.71569 | -4.06235 | 0.000588 | -0.23133 | XM_215428    | Rn.44172  |
| A_44_P329139 | -0.71569 | -3.02789 | 0.006545 | -2.24624 | XM_224588    | Rn.11687  |
| A_43_P17974  | -0.71659 | -3.09709 | 0.005591 | -2.11486 | XM_341688    | Rn.107745 |
| A_44_P295151 | -0.71685 | -3.89589 | 0.000871 | -0.55906 | XM_224561    | Rn.1761   |
| A_44_P403209 | -0.7176  | -3.13424 | 0.005136 | -2.04398 | NM_001013073 | Rn.48897  |
| A_43_P19299  | -0.71838 | -4.52062 | 0.0002   | 0.666171 | XM_235571    | Rn.207175 |
| A_44_P323430 | -0.7185  | -3.38173 | 0.002903 | -1.56684 | NM_138532    | Rn.82718  |
| A_44_P128447 | -0.71917 | -3.34909 | 0.003131 | -1.63019 | NM_001007680 | Rn.15395  |
| A_44_P229618 | -0.71918 | -3.94837 | 0.000769 | -0.4557  | XM_228065    | Rn.46413  |
| A_44_P187789 | -0.71996 | -2.94849 | 0.007832 | -2.3959  | XM_001066818 | Rn.98517  |
| A_44_P474509 | -0.72016 | -3.81817 | 0.001046 | -0.71206 | CO394478     | Rn.163525 |
| A_44_P389212 | -0.72065 | -2.94181 | 0.007951 | -2.40844 | NM_001024975 | Rn.103625 |
| A_44_P887061 | -0.7207  | -2.97887 | 0.007313 | -2.33879 | BC107438     |           |
| A_44_P260644 | -0.72127 | -3.67213 | 0.001474 | -0.9992  | XM_576264    | Rn.99794  |
| A_44_P437641 | -0.72133 | -3.55864 | 0.001922 | -1.22174 | NM_001007702 | Rn.13725  |
| A_44_P366177 | -0.72167 | -3.20233 | 0.004393 | -1.91351 | DN933141     | Rn.102946 |
| A_43_P17527  | -0.72211 | -3.09015 | 0.00568  | -2.12807 | NM_001024261 | Rn.159746 |
| A_44_P250983 | -0.72229 | -3.89095 | 0.000881 | -0.56878 | XM_001057073 | Rn.198238 |
| A_44_P124294 | -0.72267 | -3.2203  | 0.004216 | -1.87898 | NM_001012003 | Rn.75605  |
| A_44_P538531 | -0.72287 | -3.37055 | 0.002979 | -1.58855 | NM_053742    | Rn.2399   |
| A_44_P424092 | -0.72288 | -3.01236 | 0.006779 | -2.27561 | NM_001025669 | Rn.3660   |
| A_44_P189909 | -0.72397 | -3.50545 | 0.002177 | -1.32577 | NM_001025020 | Rn.162709 |
| A_44_P607982 | -0.72405 | -2.85647 | 0.009631 | -2.56773 |              |           |
| A_44_P210461 | -0.72422 | -3.52168 | 0.002096 | -1.29405 | NM_017025    | Rn.107896 |
| A_44_P227121 | -0.72543 | -4.45355 | 0.000234 | 0.535574 | XM_341301    | Rn.16701  |
| A_44_P356322 | -0.72578 | -3.61809 | 0.001673 | -1.10525 | XM_219482    | Rn.145015 |
| A_44_P126131 | -0.72618 | -3.58859 | 0.001792 | -1.16308 | XM_341215    | Rn.24535  |
| A_44_P827919 | -0.72647 | -2.85465 | 0.00967  | -2.5711  |              |           |
| A_42_P521609 | -0.72696 | -3.50752 | 0.002166 | -1.32173 | XM_221635    | Rn.17121  |
| A_43_P12890  | -0.72708 | -3.27977 | 0.003676 | -1.76436 | NM_053665    | Rn.163146 |
| A_44_P126310 | -0.72742 | -3.1213  | 0.00529  | -2.06868 | NM_001005537 | Rn.19642  |
| A_44_P438442 | -0.72806 | -3.06307 | 0.006042 | -2.17955 | XM_001069431 | Rn.32026  |
| A_44_P197041 | -0.72808 | -3.6864  | 0.001425 | -0.97119 | NM_001035221 | Rn.1136   |
| A_44_P320894 | -0.7285  | -3.31887 | 0.003358 | -1.68875 | NM_013090    | Rn.31977  |
| A_44_P854406 | -0.729   | -2.96613 | 0.007527 | -2.36277 |              |           |
| A_44_P400112 | -0.72918 | -3.00103 | 0.006955 | -2.297   | CO384551     | Rn.96238  |
| A_44_P326124 | -0.72969 | -3.37839 | 0.002926 | -1.57333 | XM_001056105 |           |
| A_44_P154367 | -0.73034 | -3.22323 | 0.004187 | -1.87334 | NM_001024744 | Rn.66098  |
| A_44_P530424 | -0.73208 | -3.18087 | 0.004615 | -1.95471 | BC085931     | Rn.2639   |
| A_44_P116846 | -0.73271 | -4.86812 | 8.84E-05 | 1.336596 | XM_341384    | Rn.162241 |
| A_44_P250412 | -0.73329 | -3.3408  | 0.003192 | -1.64627 | NM_001007713 | Rn.204023 |
| A_43_P13047  | -0.73513 | -3.35038 | 0.003122 | -1.6277  | NM_057148    | Rn.98570  |
| A_44_P103160 | -0.73566 | -3.57859 | 0.001835 | -1.18268 | XM_342909    | Rn.2252   |
| A_43_P11514  | -0.73639 | -3.44909 | 0.002482 | -1.43576 | NM_012678    | Rn.108199 |
| A_44_P119007 | -0.73665 | -3.5243  | 0.002083 | -1.28892 | NM_172321    | Rn.9716   |
| A_44_P729866 | -0.73771 | -3.73729 | 0.001265 | -0.87117 | CA511309     | Rn.179256 |
| A_44_P300506 | -0.73803 | -3.9381  | 0.000788 | -0.47594 | NM_022399    | Rn.974    |
| A_44_P656856 | -0.73846 | -2.93043 | 0.008158 | -2.42976 | CK596682     | Rn.14625  |
| A_44_P557962 | -0.73918 | -3.47445 | 0.00234  | -1.38629 | XM_232602    |           |
| A_44_P520190 | -0.73951 | -2.98168 | 0.007267 | -2.33349 | NM_134414    | Rn.2869   |
| A_44_P443030 | -0.73953 | -3.14476 | 0.005014 | -2.02386 | XM_223227    | Rn.27798  |
| A_44_P525645 | -0.73972 | -3.63108 | 0.001623 | -1.07978 | XM_220442    | Rn.214179 |
| A_44_P550581 | -0.73976 | -3.66198 | 0.001509 | -1.01913 | XM_218411    | Rn.130535 |
| A_44_P434216 | -0.74031 | -3.18205 | 0.004603 | -1.95244 | NM_001012193 | Rn.24910  |
| A_43_P12932  | -0.74065 | -3.38875 | 0.002856 | -1.5532  | NM_053788    | Rn.9943   |

|               |          |          |          |          |              |           |
|---------------|----------|----------|----------|----------|--------------|-----------|
| A_44_P233736  | -0.74102 | -3.195   | 0.004468 | -1.9276  | NM_001004090 | Rn.98240  |
| A_44_P489120  | -0.74147 | -2.9228  | 0.008299 | -2.44406 | NM_001007701 | Rn.104193 |
| A_44_P440633  | -0.74154 | -3.84263 | 0.000987 | -0.66392 | NM_031639    | Rn.10238  |
| A_44_P415412  | -0.74256 | -3.12698 | 0.005222 | -2.05785 | NM_001004252 | Rn.17054  |
| A_44_P445318  | -0.74296 | -3.41425 | 0.002692 | -1.5036  | XM_215985    | Rn.42890  |
| A_43_P15432   | -0.74297 | -3.35463 | 0.003091 | -1.61945 | NM_053910    | Rn.10672  |
| A_44_P1015001 | -0.74347 | -2.898   | 0.008775 | -2.49041 | U50842       | Rn.99540  |
| A_44_P1014311 | -0.74378 | -3.27494 | 0.003717 | -1.77369 | XM_343619    | Rn.101734 |
| A_44_P248484  | -0.7439  | -3.26738 | 0.003782 | -1.78828 | XM_001069080 | Rn.78670  |
| A_44_P312484  | -0.74397 | -3.50663 | 0.002171 | -1.32346 | XM_213426    | Rn.2567   |
| A_44_P405793  | -0.7458  | -3.91347 | 0.000835 | -0.52443 | XM_244089    | Rn.208665 |
| A_44_P473754  | -0.74689 | -3.60769 | 0.001714 | -1.12566 | XM_221656    | Rn.7967   |
| A_43_P18072   | -0.74696 | -3.72996 | 0.001287 | -0.88558 | NM_001013413 | Rn.6408   |
| A_44_P714315  | -0.74724 | -3.47339 | 0.002346 | -1.38836 | CO404950     | Rn.45255  |
| A_43_P18263   | -0.7503  | -3.09377 | 0.005633 | -2.12117 | NM_001025421 | Rn.203134 |
| A_44_P760403  | -0.75037 | -3.85965 | 0.000948 | -0.6304  |              |           |
| A_44_P454177  | -0.75055 | -3.0849  | 0.005748 | -2.13805 | NM_182675    | Rn.2496   |
| A_43_P20387   | -0.75055 | -3.65848 | 0.001522 | -1.02602 | XM_232614    | Rn.6834   |
| A_44_P853268  | -0.75101 | -4.47339 | 0.000223 | 0.574235 | CO393484     | Rn.203091 |
| A_43_P16469   | -0.75132 | -3.0425  | 0.006331 | -2.21857 | NM_001083313 | Rn.6239   |
| A_43_P10226   | -0.75144 | -2.84782 | 0.009819 | -2.58379 | XM_236333    | Rn.26984  |
| A_44_P159569  | -0.75145 | -4.04903 | 0.000607 | -0.25754 | NM_001039587 | Rn.11823  |
| A_44_P330332  | -0.75155 | -3.28325 | 0.003646 | -1.75762 | BC129128     | Rn.20     |
| A_44_P229800  | -0.75432 | -2.86797 | 0.009386 | -2.54636 | NM_001011991 | Rn.153992 |
| A_43_P15423   | -0.75444 | -4.13143 | 0.0005   | -0.09545 | NM_019239    | Rn.9803   |
| A_44_P806641  | -0.75496 | -3.09707 | 0.005591 | -2.11488 | XM_236024    |           |
| A_44_P187293  | -0.75558 | -3.01753 | 0.0067   | -2.26585 | XM_344175    |           |
| A_44_P286719  | -0.75658 | -3.20694 | 0.004347 | -1.90466 | XM_224863    | Rn.16962  |
| A_44_P321686  | -0.75683 | -3.03412 | 0.006453 | -2.23444 | XM_001060299 | Rn.212953 |
| A_44_P270510  | -0.75737 | -3.10968 | 0.005432 | -2.09086 | XM_220420    | Rn.17594  |
| A_44_P203842  | -0.75798 | -3.07948 | 0.00582  | -2.14836 | BP485454     | Rn.216026 |
| A_44_P145416  | -0.75854 | -3.25682 | 0.003876 | -1.80865 | NM_001007646 | Rn.105976 |
| A_44_P775952  | -0.75929 | -3.59058 | 0.001784 | -1.15919 |              |           |
| A_44_P482512  | -0.75967 | -3.93524 | 0.000794 | -0.48157 | XM_343513    | Rn.1423   |
| A_44_P548303  | -0.76019 | -3.15577 | 0.004889 | -2.0028  | NM_001009688 | Rn.12345  |
| A_44_P375252  | -0.76043 | -3.64515 | 0.00157  | -1.05217 | XM_342379    | Rn.7645   |
| A_44_P838313  | -0.76068 | -3.83701 | 0.001    | -0.67497 |              |           |
| A_43_P17880   | -0.76267 | -4.34422 | 0.000302 | 0.322027 | NM_182953    | Rn.18744  |
| A_44_P545635  | -0.76267 | -3.92659 | 0.00081  | -0.4986  | AY325140     | Rn.208293 |
| A_44_P541378  | -0.76295 | -4.38151 | 0.000277 | 0.394951 | NM_001014242 | Rn.1166   |
| A_44_P475159  | -0.76295 | -3.58374 | 0.001813 | -1.17259 | NM_012673    | Rn.108198 |
| A_44_P261818  | -0.76305 | -3.20759 | 0.004341 | -1.90342 | BC087666     | Rn.8161   |
| A_44_P806713  | -0.76383 | -4.22581 | 0.0004   | 0.089969 |              |           |
| A_44_P1020219 | -0.7645  | -3.33879 | 0.003207 | -1.65017 | CO574509     | Rn.162190 |
| A_44_P439573  | -0.76454 | -4.60261 | 0.000165 | 0.825362 | DV728042     | Rn.1619   |
| A_43_P12453   | -0.76465 | -3.07191 | 0.005921 | -2.16275 | NM_030839    | Rn.204880 |
| A_44_P253601  | -0.76599 | -3.71387 | 0.001336 | -0.91722 | NM_001025009 | Rn.2495   |
| A_44_P203793  | -0.76667 | -3.47191 | 0.002354 | -1.39126 | NM_001013912 | Rn.144837 |
| A_44_P172936  | -0.76738 | -2.84087 | 0.009972 | -2.59667 | NM_138613    | Rn.7544   |
| A_44_P229670  | -0.76753 | -2.92229 | 0.008309 | -2.44501 | XM_001075438 | Rn.109840 |
| A_44_P451014  | -0.76848 | -3.01906 | 0.006677 | -2.26294 | NM_017322    | Rn.9910   |
| A_44_P203665  | -0.76852 | -3.18739 | 0.004547 | -1.94221 | XM_223270    | Rn.162246 |
| A_44_P550454  | -0.76885 | -4.09248 | 0.000548 | -0.17204 |              |           |
| A_44_P213320  | -0.76886 | -2.99317 | 0.00708  | -2.31183 | XM_236873    | Rn.198381 |
| A_44_P852634  | -0.76985 | -3.63252 | 0.001617 | -1.07696 | XR_007953    | Rn.197347 |
| A_44_P961330  | -0.77033 | -3.17022 | 0.00473  | -1.97514 |              |           |
| A_44_P351789  | -0.77082 | -3.08008 | 0.005812 | -2.14723 | XM_341509    | Rn.20096  |
| A_44_P134405  | -0.77089 | -3.17456 | 0.004683 | -1.96681 | NM_031798    | Rn.11523  |

|               |          |          |          |          |              |           |
|---------------|----------|----------|----------|----------|--------------|-----------|
| A_44_P545727  | -0.77122 | -3.64864 | 0.001557 | -1.04533 | XM_341086    | Rn.16272  |
| A_44_P236656  | -0.77127 | -3.79641 | 0.001101 | -0.75489 | XM_343817    | Rn.98982  |
| A_44_P832837  | -0.77152 | -2.94154 | 0.007956 | -2.40895 | AW143397     |           |
| A_44_P230410  | -0.77156 | -2.93941 | 0.007994 | -2.41294 | NM_031600    | Rn.11044  |
| A_44_P363204  | -0.77167 | -3.00867 | 0.006836 | -2.28258 | NM_053824    | Rn.4231   |
| A_44_P274397  | -0.7718  | -3.24276 | 0.004003 | -1.83574 | NM_001033700 | Rn.1448   |
| A_43_P17671   | -0.7721  | -3.7467  | 0.001237 | -0.85268 | NM_001014186 | Rn.137519 |
| A_44_P150089  | -0.7723  | -3.62236 | 0.001656 | -1.09689 | NM_001013229 | Rn.99076  |
| A_44_P671470  | -0.7723  | -3.19848 | 0.004433 | -1.92092 |              |           |
| A_44_P459301  | -0.77262 | -2.98892 | 0.007149 | -2.31985 | XM_219377    | Rn.162468 |
| A_44_P377645  | -0.77345 | -4.79188 | 0.000106 | 1.190514 | XM_342774    |           |
| A_44_P287250  | -0.77376 | -2.91751 | 0.008399 | -2.45396 | NM_022521    | Rn.1430   |
| A_44_P538538  | -0.77411 | -2.90255 | 0.008686 | -2.48191 | NM_017357    | Rn.34529  |
| A_44_P250030  | -0.77556 | -2.87185 | 0.009305 | -2.53915 | NM_013107    | Rn.40476  |
| A_44_P142562  | -0.77634 | -3.36026 | 0.003051 | -1.60853 | NM_001007643 | Rn.3027   |
| A_44_P215689  | -0.77949 | -2.98835 | 0.007158 | -2.32092 | XM_343744    |           |
| A_44_P725617  | -0.7797  | -3.64065 | 0.001587 | -1.06102 | BF548107     | Rn.162539 |
| A_44_P138363  | -0.77975 | -2.88998 | 0.008934 | -2.50537 | XM_344057    | Rn.14920  |
| A_44_P184279  | -0.78011 | -2.92214 | 0.008311 | -2.44529 | NM_012504    | Rn.2992   |
| A_43_P17443   | -0.78041 | -4.82551 | 9.77E-05 | 1.255038 | XM_230647    | Rn.34193  |
| A_44_P157118  | -0.78119 | -3.19712 | 0.004446 | -1.92353 | BC089114     | Rn.42737  |
| A_44_P159455  | -0.78271 | -3.50529 | 0.002178 | -1.32607 | XM_001062352 |           |
| A_44_P208711  | -0.78277 | -2.88113 | 0.009113 | -2.52186 | XM_001075438 | Rn.109840 |
| A_44_P290703  | -0.78279 | -3.38015 | 0.002914 | -1.5699  | XM_226680    |           |
| A_44_P322500  | -0.78291 | -3.58783 | 0.001796 | -1.16458 | CK473706     | Rn.22996  |
| A_44_P100740  | -0.7831  | -3.11203 | 0.005403 | -2.08638 | NM_001024243 | Rn.195252 |
| A_44_P386515  | -0.78324 | -3.00668 | 0.006867 | -2.28634 | NM_001008771 | Rn.14128  |
| A_44_P322960  | -0.78375 | -4.69167 | 0.000134 | 0.997599 | NM_022532    | Rn.1714   |
| A_44_P759589  | -0.78386 | -3.49734 | 0.002218 | -1.34161 | CF110322     | Rn.164561 |
| A_44_P452668  | -0.78399 | -4.04999 | 0.000605 | -0.25566 | XM_342731    | Rn.203214 |
| A_44_P356468  | -0.78492 | -3.45006 | 0.002477 | -1.43386 | XR_007829    | Rn.155466 |
| A_44_P283971  | -0.78501 | -4.45247 | 0.000234 | 0.53347  | XM_232972    | Rn.19954  |
| A_43_P19994   | -0.78518 | -3.89703 | 0.000868 | -0.5568  | XM_233485    | Rn.50631  |
| A_43_P20118   | -0.78579 | -2.92516 | 0.008255 | -2.43964 | BC099746     | Rn.4098   |
| A_43_P21464   | -0.78587 | -3.0589  | 0.006099 | -2.18746 | XM_233220    | Rn.213735 |
| A_44_P382523  | -0.78601 | -2.86569 | 0.009434 | -2.5506  | XM_236376    | Rn.163030 |
| A_44_P344425  | -0.78611 | -3.23431 | 0.004082 | -1.85202 | XM_224538    | Rn.10431  |
| A_44_P1039444 | -0.78639 | -2.99522 | 0.007048 | -2.30796 | NM_032613    | Rn.94195  |
| A_44_P326090  | -0.78652 | -3.55564 | 0.001936 | -1.22761 | XM_342312    | Rn.162625 |
| A_44_P425380  | -0.7868  | -5.39361 | 2.62E-05 | 2.324366 | NM_001011991 | Rn.153992 |
| A_44_P480240  | -0.78696 | -2.94627 | 0.007872 | -2.40007 | NM_019182    | Rn.205059 |
| A_44_P831218  | -0.7889  | -2.91452 | 0.008455 | -2.45955 | CK596627     | Rn.161389 |
| A_43_P23188   | -0.78924 | -3.02334 | 0.006612 | -2.25485 | XM_001053087 |           |
| A_44_P422271  | -0.78954 | -4.19664 | 0.000428 | 0.032702 | XM_217019    | Rn.99537  |
| A_44_P825629  | -0.78999 | -3.15321 | 0.004918 | -2.0077  |              |           |
| A_44_P966141  | -0.79039 | -3.19602 | 0.004458 | -1.92563 | CO399145     | Rn.25185  |
| A_44_P501082  | -0.79087 | -2.93503 | 0.008074 | -2.42116 | NM_134346    | Rn.95071  |
| A_44_P367698  | -0.79136 | -3.10955 | 0.005434 | -2.09111 | NM_031720    | Rn.88380  |
| A_43_P10511   | -0.79225 | -3.37342 | 0.00296  | -1.58298 | XM_342289    | Rn.137428 |
| A_44_P340393  | -0.79238 | -5.074   | 5.48E-05 | 1.72778  | XR_009391    | Rn.195880 |
| A_44_P246128  | -0.79279 | -3.00167 | 0.006945 | -2.2958  | XM_576696    | Rn.101054 |
| A_44_P168102  | -0.79296 | -2.84876 | 0.009798 | -2.58204 | NM_031729    | Rn.6107   |
| A_43_P17837   | -0.793   | -3.20673 | 0.004349 | -1.90507 | XM_215423    | Rn.22395  |
| A_43_P18051   | -0.79346 | -3.58182 | 0.001821 | -1.17636 | XM_001054856 |           |
| A_44_P536676  | -0.79376 | -3.1337  | 0.005142 | -2.045   | NM_001013158 | Rn.3666   |
| A_44_P506374  | -0.79424 | -3.57209 | 0.001863 | -1.19541 | XM_001073596 | Rn.133954 |
| A_44_P553939  | -0.79454 | -3.31451 | 0.003392 | -1.69718 | BG667845     | Rn.13677  |
| A_44_P149954  | -0.7946  | -3.00072 | 0.00696  | -2.2976  | XM_576917    | Rn.196493 |

|               |          |          |          |          |              |           |
|---------------|----------|----------|----------|----------|--------------|-----------|
| A_44_P324452  | -0.79464 | -3.14623 | 0.004997 | -2.02106 | NM_001048184 | Rn.6455   |
| A_44_P1029770 | -0.79519 | -3.43116 | 0.002588 | -1.4707  | NM_001025732 | Rn.145204 |
| A_44_P485246  | -0.7955  | -4.50143 | 0.000209 | 0.628841 | XR_006015    | Rn.197769 |
| A_43_P21256   | -0.79594 | -2.97218 | 0.007425 | -2.35137 | NM_001083966 | Rn.8189   |
| A_44_P764308  | -0.79678 | -3.49622 | 0.002224 | -1.3438  |              |           |
| A_44_P1008284 | -0.79708 | -4.16045 | 0.000467 | -0.0384  |              |           |
| A_44_P500250  | -0.79737 | -2.94713 | 0.007857 | -2.39845 | XM_343404    | Rn.11883  |
| A_44_P380157  | -0.79748 | -3.19337 | 0.004485 | -1.93072 | XM_001074009 | Rn.145750 |
| A_44_P539738  | -0.79803 | -2.99091 | 0.007117 | -2.3161  | NM_022862    | Rn.10127  |
| A_44_P268837  | -0.80088 | -3.40251 | 0.002766 | -1.52644 | NM_001013923 | Rn.93910  |
| A_44_P536282  | -0.80115 | -4.439   | 0.000242 | 0.507203 | NM_001013130 | Rn.93208  |
| A_44_P506464  | -0.80237 | -3.36662 | 0.003007 | -1.59619 | XR_005489    | Rn.196156 |
| A_42_P505280  | -0.80242 | -3.49041 | 0.002254 | -1.35513 | NM_001012063 | Rn.9014   |
| A_43_P16672   | -0.80295 | -3.36842 | 0.002994 | -1.59269 | NM_001024800 | Rn.1822   |
| A_44_P331164  | -0.80451 | -3.20958 | 0.004321 | -1.89959 | NM_001013974 | Rn.107772 |
| A_44_P218229  | -0.80511 | -2.96274 | 0.007585 | -2.36914 | XR_006724    | Rn.197351 |
| A_44_P806917  | -0.80515 | -3.81591 | 0.001051 | -0.71652 |              |           |
| A_44_P366005  | -0.80517 | -3.29426 | 0.003555 | -1.73635 | XR_008061    | Rn.195662 |
| A_44_P387374  | -0.80534 | -3.29148 | 0.003578 | -1.74173 | XM_221315    | Rn.63502  |
| A_44_P944991  | -0.80573 | -4.00033 | 0.000681 | -0.3534  |              |           |
| A_44_P335898  | -0.80598 | -3.27264 | 0.003737 | -1.77812 | BC097982     | Rn.48329  |
| A_44_P871871  | -0.80724 | -4.61119 | 0.000161 | 0.841983 |              |           |
| A_44_P987960  | -0.80876 | -3.50306 | 0.002189 | -1.33044 | CO398009     | Rn.25416  |
| A_44_P365155  | -0.80965 | -3.15841 | 0.004859 | -1.99775 | NM_012583    | Rn.47     |
| A_44_P410080  | -0.81097 | -2.9771  | 0.007343 | -2.34212 | XM_001061719 | Rn.7745   |
| A_43_P13247   | -0.811   | -3.17927 | 0.004632 | -1.95779 | XM_001070141 | Rn.64489  |
| A_43_P10441   | -0.81137 | -3.53204 | 0.002046 | -1.27378 | XM_217149    | Rn.137571 |
| A_44_P558119  | -0.81138 | -3.19236 | 0.004495 | -1.93267 | XM_236476    | Rn.7567   |
| A_44_P612824  | -0.81147 | -3.03376 | 0.006458 | -2.23512 | NM_183326    | Rn.28463  |
| A_44_P524981  | -0.81184 | -3.10221 | 0.005526 | -2.10509 | NM_024373    | Rn.10266  |
| A_43_P13175   | -0.81215 | -3.3448  | 0.003163 | -1.63851 | NM_133405    | Rn.212745 |
| A_44_P177793  | -0.81247 | -2.91864 | 0.008377 | -2.45185 |              |           |
| A_44_P165692  | -0.81344 | -3.86802 | 0.00093  | -0.61393 | NM_001034003 | Rn.2352   |
| A_44_P344421  | -0.81448 | -3.63381 | 0.001612 | -1.07443 | XM_224538    | Rn.10431  |
| A_44_P590197  | -0.81577 | -3.62257 | 0.001655 | -1.09647 | AW915353     | Rn.4268   |
| A_44_P419565  | -0.81707 | -3.76594 | 0.001182 | -0.81483 | XM_231128    | Rn.17259  |
| A_43_P10318   | -0.81731 | -2.84924 | 0.009787 | -2.58115 | XM_001062954 | Rn.107561 |
| A_44_P375593  | -0.81746 | -3.24267 | 0.004004 | -1.83591 | XM_001053401 | Rn.159763 |
| A_42_P658005  | -0.81775 | -3.92758 | 0.000808 | -0.49666 | XM_573442    | Rn.60443  |
| A_44_P821396  | -0.81801 | -3.13023 | 0.005183 | -2.05164 | XM_220013    | Rn.17150  |
| A_44_P297114  | -0.8182  | -3.83834 | 0.000997 | -0.67237 | NM_001014226 | Rn.13255  |
| A_43_P10712   | -0.81831 | -4.28674 | 0.000346 | 0.209449 | CO385963     | Rn.169246 |
| A_44_P135148  | -0.81887 | -3.1113  | 0.005412 | -2.08777 | NM_130894    | Rn.8570   |
| A_43_P20941   | -0.81895 | -3.32789 | 0.003289 | -1.67129 | NM_001009685 | Rn.102143 |
| A_44_P114774  | -0.81968 | -3.25356 | 0.003905 | -1.81493 | XM_343190    | Rn.7015   |
| A_44_P231724  | -0.8197  | -2.92887 | 0.008186 | -2.43269 | XR_009038    | Rn.196606 |
| A_44_P287286  | -0.82102 | -3.21399 | 0.004277 | -1.89111 | XM_216910    | Rn.140163 |
| A_44_P589989  | -0.82136 | -3.05041 | 0.006218 | -2.20358 | CA339579     | Rn.91712  |
| A_42_P544887  | -0.82314 | -3.21152 | 0.004302 | -1.89586 | NM_031665    | Rn.100217 |
| A_44_P509872  | -0.82419 | -3.00105 | 0.006955 | -2.29698 | XM_238280    | Rn.20506  |
| A_43_P23313   | -0.82456 | -3.02399 | 0.006603 | -2.25361 | NM_001006960 | Rn.106244 |
| A_44_P637687  | -0.8257  | -3.21735 | 0.004244 | -1.88466 | XM_001079537 |           |
| A_44_P476598  | -0.82636 | -3.31993 | 0.00335  | -1.6867  | XM_575808    | Rn.169839 |
| A_44_P471848  | -0.82645 | -3.48049 | 0.002307 | -1.3745  | XM_225257    | Rn.128652 |
| A_44_P560788  | -0.82684 | -3.60226 | 0.001736 | -1.13631 | CO566111     | Rn.114933 |
| A_43_P18579   | -0.82732 | -3.20081 | 0.004409 | -1.91645 | XM_231162    | Rn.103250 |
| A_44_P507881  | -0.82746 | -3.06747 | 0.005981 | -2.1712  | AI502676     | Rn.54645  |
| A_44_P550412  | -0.82778 | -3.7411  | 0.001253 | -0.86368 | AF375874     | Rn.86991  |

|               |          |          |          |          |              |           |
|---------------|----------|----------|----------|----------|--------------|-----------|
| A_44_P455174  | -0.83021 | -3.97363 | 0.000725 | -0.40598 | NM_001014116 | Rn.155261 |
| A_44_P203682  | -0.83053 | -3.54434 | 0.001988 | -1.24974 | XM_215113    | Rn.104893 |
| A_44_P671835  | -0.83057 | -3.28807 | 0.003606 | -1.74832 |              |           |
| A_44_P259574  | -0.83064 | -3.16576 | 0.004778 | -1.98367 | NM_053290    | Rn.1383   |
| A_44_P494510  | -0.83076 | -3.38952 | 0.002851 | -1.5517  | XM_001068808 | Rn.155453 |
| A_44_P166777  | -0.83115 | -3.00862 | 0.006837 | -2.28267 | XM_574528    | Rn.122632 |
| A_44_P920120  | -0.83168 | -3.4174  | 0.002672 | -1.49748 | XM_001066536 | Rn.110441 |
| A_44_P606516  | -0.83203 | -3.91695 | 0.000829 | -0.51759 |              |           |
| A_44_P209817  | -0.83242 | -4.29276 | 0.000341 | 0.221246 | BC078744     | Rn.22518  |
| A_43_P21088   | -0.83259 | -3.45525 | 0.002447 | -1.42375 | XM_229993    | Rn.51147  |
| A_44_P274491  | -0.83289 | -3.22701 | 0.004151 | -1.86607 | XM_341645    | Rn.24338  |
| A_44_P141513  | -0.83354 | -3.26832 | 0.003774 | -1.78646 | NM_001014175 | Rn.15859  |
| A_44_P123908  | -0.83393 | -2.89561 | 0.008822 | -2.49487 | XM_342338    | Rn.1713   |
| A_43_P18107   | -0.83474 | -3.44676 | 0.002496 | -1.44029 | XR_008372    | Rn.36184  |
| A_44_P432432  | -0.83528 | -3.47686 | 0.002327 | -1.3816  | NM_013151    | Rn.107102 |
| A_43_P10854   | -0.8356  | -2.94035 | 0.007977 | -2.41117 | NM_001011934 | Rn.98198  |
| A_44_P124225  | -0.83573 | -3.41754 | 0.002671 | -1.49719 | NM_001025701 | Rn.3991   |
| A_44_P852513  | -0.83581 | -3.89638 | 0.00087  | -0.55809 | XR_005712    | Rn.216204 |
| A_44_P883146  | -0.83589 | -3.64378 | 0.001575 | -1.05487 | NM_001007682 | Rn.163276 |
| A_43_P10831   | -0.83625 | -3.43918 | 0.00254  | -1.45507 | NM_001013207 | Rn.8555   |
| A_44_P662685  | -0.83669 | -3.50289 | 0.00219  | -1.33076 | NM_001025046 | Rn.161821 |
| A_44_P540542  | -0.83697 | -3.21521 | 0.004265 | -1.88876 | XM_001054154 | Rn.1269   |
| A_44_P720404  | -0.83721 | -3.23545 | 0.004071 | -1.84982 | XM_231564    | Rn.8222   |
| A_44_P963185  | -0.83819 | -3.67974 | 0.001448 | -0.98427 | AB014879     | Rn.90013  |
| A_44_P226881  | -0.83954 | -2.96361 | 0.00757  | -2.36751 | NM_031079    | Rn.10044  |
| A_44_P177807  | -0.83999 | -4.80135 | 0.000103 | 1.208701 | NM_023090    | Rn.55138  |
| A_44_P511049  | -0.84018 | -3.65688 | 0.001527 | -1.02915 | XM_224947    | Rn.1880   |
| A_44_P974681  | -0.84028 | -3.58459 | 0.001809 | -1.17093 | XM_575362    | Rn.195816 |
| A_43_P17622   | -0.84034 | -4.4513  | 0.000235 | 0.531183 | XM_345870    | Rn.52275  |
| A_44_P794598  | -0.84037 | -3.27501 | 0.003716 | -1.77354 | NM_198132    | Rn.107690 |
| A_44_P621980  | -0.84087 | -2.94899 | 0.007824 | -2.39497 | M31178       | Rn.3908   |
| A_44_P163645  | -0.84116 | -4.13063 | 0.000501 | -0.09701 | NM_001014135 | Rn.3168   |
| A_43_P10843   | -0.84205 | -3.08125 | 0.005797 | -2.145   | XM_342312    | Rn.162625 |
| A_44_P856158  | -0.84209 | -4.17989 | 0.000446 | -0.0002  | XM_001058383 | Rn.172982 |
| A_44_P680369  | -0.84222 | -3.99521 | 0.000689 | -0.36349 | BF545930     | Rn.163742 |
| A_44_P487562  | -0.84318 | -3.7762  | 0.001154 | -0.79464 | NM_001039023 | Rn.3889   |
| A_43_P15854   | -0.8438  | -3.411   | 0.002712 | -1.50993 | XM_227134    | Rn.15040  |
| A_44_P241862  | -0.84419 | -3.4067  | 0.002739 | -1.51829 | NM_022615    | Rn.91572  |
| A_44_P403415  | -0.84445 | -3.58254 | 0.001818 | -1.17494 | XM_343301    | Rn.162000 |
| A_44_P543548  | -0.84493 | -3.41833 | 0.002666 | -1.49566 | NM_057119    | Rn.8538   |
| A_44_P1039760 | -0.84495 | -2.87286 | 0.009284 | -2.53726 | NM_001013228 | Rn.106023 |
| A_44_P249164  | -0.84596 | -3.23384 | 0.004086 | -1.85293 | NM_031028    | Rn.30059  |
| A_43_P15265   | -0.84787 | -4.11875 | 0.000515 | -0.12039 | NM_017042    | Rn.11063  |
| A_44_P242781  | -0.84849 | -3.7436  | 0.001246 | -0.85877 | DY308836     | Rn.167869 |
| A_44_P501483  | -0.85038 | -4.03117 | 0.000633 | -0.2927  | XR_006667    | Rn.216235 |
| A_44_P475744  | -0.8507  | -3.12427 | 0.005254 | -2.06301 | XM_215524    | Rn.22753  |
| A_44_P151399  | -0.85178 | -3.33929 | 0.003203 | -1.64919 | NM_198737    | Rn.3366   |
| A_44_P112788  | -0.85269 | -4.04472 | 0.000613 | -0.26603 | NM_021850    | Rn.44267  |
| A_42_P693042  | -0.85293 | -3.66701 | 0.001492 | -1.00926 | XM_214555    | Rn.209444 |
| A_44_P932876  | -0.85312 | -3.07002 | 0.005947 | -2.16634 | NM_001014239 | Rn.3663   |
| A_42_P713975  | -0.85318 | -2.98626 | 0.007192 | -2.32487 | BC082799     | Rn.30992  |
| A_43_P10213   | -0.85468 | -3.32828 | 0.003286 | -1.67052 | XM_232515    | Rn.7630   |
| A_44_P323496  | -0.85738 | -3.58245 | 0.001818 | -1.17512 | NM_019311    | Rn.10659  |
| A_44_P322590  | -0.85893 | -3.21225 | 0.004295 | -1.89447 | NM_057211    | Rn.19481  |
| A_44_P243701  | -0.85938 | -2.99564 | 0.007041 | -2.30718 | XM_578871    | Rn.195709 |
| A_44_P753384  | -0.8606  | -3.64714 | 0.001563 | -1.04827 |              |           |
| A_44_P319042  | -0.86163 | -4.0356  | 0.000626 | -0.28396 | XM_231798    | Rn.1688   |
| A_44_P342586  | -0.86213 | -3.47059 | 0.002361 | -1.39383 | NM_001014019 | Rn.160642 |



|              |          |          |          |          |              |           |
|--------------|----------|----------|----------|----------|--------------|-----------|
| A_44_P425367 | -0.86303 | -3.14314 | 0.005032 | -2.02697 | NM_001024332 | Rn.6283   |
| A_44_P759588 | -0.86457 | -4.15327 | 0.000475 | -0.05251 | CF110322     | Rn.164561 |
| A_44_P667768 | -0.86515 | -3.42155 | 0.002647 | -1.48939 |              |           |
| A_44_P520324 | -0.86534 | -3.54747 | 0.001973 | -1.2436  | XM_213911    |           |
| A_44_P342657 | -0.86777 | -3.2654  | 0.0038   | -1.79209 | XM_233792    | Rn.2644   |
| A_44_P534374 | -0.86788 | -3.53105 | 0.00205  | -1.27572 | XM_227614    | Rn.6718   |
| A_44_P199420 | -0.86915 | -3.37253 | 0.002966 | -1.5847  | XM_235924    | Rn.4026   |
| A_42_P522171 | -0.86972 | -3.14713 | 0.004987 | -2.01933 | XM_001081512 |           |
| A_44_P930764 | -0.87037 | -3.62275 | 0.001655 | -1.09612 | NM_001013125 | Rn.159939 |
| A_44_P145549 | -0.87039 | -3.69008 | 0.001413 | -0.96397 | NM_019182    | Rn.205059 |
| A_44_P230875 | -0.8704  | -3.22381 | 0.004182 | -1.87222 | BF567478     | Rn.985    |
| A_42_P545928 | -0.87106 | -2.94139 | 0.007959 | -2.40922 | NM_153730    | Rn.198416 |
| A_44_P233569 | -0.87169 | -4.19053 | 0.000435 | 0.020694 | NM_031770    | Rn.23042  |
| A_44_P198535 | -0.87452 | -4.60517 | 0.000164 | 0.830324 | NM_057103    | Rn.122094 |
| A_44_P975286 | -0.87515 | -4.2714  | 0.000359 | 0.179399 | CO403766     | Rn.164897 |
| A_44_P944912 | -0.8768  | -3.49984 | 0.002205 | -1.33673 |              |           |
| A_44_P362541 | -0.87682 | -3.76685 | 0.00118  | -0.81303 | NM_001013235 | Rn.18315  |
| A_44_P283715 | -0.87695 | -3.04935 | 0.006233 | -2.20559 | XM_223664    | Rn.3740   |
| A_44_P219796 | -0.87924 | -3.30582 | 0.003461 | -1.714   | XM_230038    | Rn.2611   |
| A_44_P102628 | -0.8802  | -3.06102 | 0.00607  | -2.18344 | NM_021688    | Rn.15693  |
| A_44_P548507 | -0.88214 | -3.00044 | 0.006965 | -2.29811 | NM_032083    | Rn.11166  |
| A_44_P471440 | -0.88288 | -3.15969 | 0.004845 | -1.9953  | NM_001024765 | Rn.94975  |
| A_44_P476663 | -0.88324 | -3.8279  | 0.001022 | -0.69292 | XM_344277    | Rn.214546 |
| A_44_P465329 | -0.8854  | -4.56407 | 0.00018  | 0.7506   | NM_012798    | Rn.10174  |
| A_44_P157167 | -0.88618 | -3.80928 | 0.001068 | -0.72956 | NM_001008324 | Rn.95954  |
| A_43_P17496  | -0.88747 | -2.91406 | 0.008464 | -2.4604  | XM_231176    | Rn.2745   |
| A_44_P137247 | -0.89159 | -3.49294 | 0.002241 | -1.35021 | NM_001025142 | Rn.153980 |
| A_44_P438744 | -0.8925  | -3.65382 | 0.001538 | -1.03516 | XM_233718    |           |
| A_44_P112050 | -0.8936  | -3.37157 | 0.002972 | -1.58656 | XM_573428    | Rn.41420  |
| A_44_P895660 | -0.89381 | -2.84273 | 0.009931 | -2.59322 | AW916954     | Rn.162467 |
| A_43_P17964  | -0.89386 | -3.76477 | 0.001186 | -0.81713 | NM_001007662 | Rn.2185   |
| A_44_P393929 | -0.89431 | -3.3768  | 0.002936 | -1.57641 | NM_001039713 | Rn.195046 |
| A_44_P207721 | -0.89434 | -3.0179  | 0.006695 | -2.26513 | XM_222946    | Rn.9047   |
| A_44_P267724 | -0.89515 | -2.88781 | 0.008978 | -2.50941 | XM_217022    | Rn.52470  |
| A_44_P512255 | -0.89516 | -3.05534 | 0.006149 | -2.19423 | NM_017214    | Rn.11065  |
| A_44_P354208 | -0.89604 | -2.9517  | 0.007776 | -2.38988 | XM_232315    | Rn.29825  |
| A_44_P860400 | -0.89607 | -3.36861 | 0.002993 | -1.59232 | CK839443     | Rn.203309 |
| A_44_P344273 | -0.89797 | -3.49454 | 0.002233 | -1.34707 | NM_001034129 | Rn.98327  |
| A_44_P948202 | -0.89955 | -4.87682 | 8.66E-05 | 1.35322  |              |           |
| A_44_P463759 | -0.89962 | -5.01509 | 6.28E-05 | 1.616357 | XM_235609    | Rn.141040 |
| A_44_P667548 | -0.89963 | -3.17326 | 0.004697 | -1.96929 |              |           |
| A_44_P918128 | -0.9016  | -3.47545 | 0.002334 | -1.38434 |              |           |
| A_44_P233742 | -0.90275 | -3.92732 | 0.000809 | -0.49716 | NM_001004090 | Rn.98240  |
| A_44_P409694 | -0.90372 | -3.44939 | 0.002481 | -1.43516 | XM_343604    | Rn.2271   |
| A_44_P232642 | -0.90572 | -3.03096 | 0.006499 | -2.24043 | NM_001008301 | Rn.11790  |
| A_44_P121401 | -0.90904 | -4.05801 | 0.000594 | -0.23986 | XM_237998    | Rn.64941  |
| A_44_P356078 | -0.91218 | -3.89307 | 0.000877 | -0.56461 | NM_017033    | Rn.9970   |
| A_44_P157604 | -0.91228 | -3.11259 | 0.005396 | -2.0853  | DY315019     | Rn.199546 |
| A_44_P745191 | -0.913   | -3.37028 | 0.002981 | -1.58908 | CF978988     | Rn.3502   |
| A_43_P11416  | -0.91374 | -3.2102  | 0.004315 | -1.89839 | XM_225625    | Rn.146822 |
| A_44_P158973 | -0.9141  | -3.74856 | 0.001232 | -0.84902 | NM_001013046 | Rn.18008  |
| A_43_P21122  | -0.9169  | -4.00759 | 0.000669 | -0.33911 | XM_341882    | Rn.7634   |
| A_44_P552865 | -0.91711 | -3.37597 | 0.002942 | -1.57802 | XM_221896    | Rn.25814  |
| A_44_P147509 | -0.91732 | -4.39104 | 0.000271 | 0.413562 | NM_199412    | Rn.214252 |
| A_43_P13702  | -0.91972 | -3.28359 | 0.003644 | -1.75698 | NM_001025136 | Rn.113703 |
| A_44_P492153 | -0.91998 | -3.24137 | 0.004016 | -1.83841 | XM_224271    | Rn.11877  |
| A_43_P10791  | -0.92115 | -3.65415 | 0.001537 | -1.03451 | CB547648     |           |
| A_43_P12189  | -0.92265 | -2.99137 | 0.007109 | -2.31523 | NM_022262    | Rn.2315   |

|              |          |          |          |          |              |           |
|--------------|----------|----------|----------|----------|--------------|-----------|
| A_44_P526933 | -0.92267 | -3.57335 | 0.001857 | -1.19295 | NM_053357    | Rn.112601 |
| A_43_P10856  | -0.92277 | -3.03779 | 0.006399 | -2.22749 | XM_001077761 | Rn.205725 |
| A_44_P415115 | -0.92346 | -3.28387 | 0.003641 | -1.75643 | XM_345660    |           |
| A_44_P221077 | -0.92647 | -2.98673 | 0.007184 | -2.32398 | NM_001017479 | Rn.18850  |
| A_44_P505932 | -0.92758 | -4.47811 | 0.000221 | 0.583443 | NM_021868    | Rn.107869 |
| A_44_P469394 | -0.92767 | -4.01403 | 0.000659 | -0.32643 | NM_022217    | Rn.44463  |
| A_44_P409339 | -0.93101 | -3.07934 | 0.005822 | -2.14864 | NM_053357    | Rn.112601 |
| A_44_P621820 | -0.93372 | -3.50585 | 0.002175 | -1.32498 | XR_005838    | Rn.196836 |
| A_44_P349309 | -0.93648 | -2.94883 | 0.007826 | -2.39526 | XM_223327    | Rn.66912  |
| A_44_P269752 | -0.93726 | -3.11306 | 0.005391 | -2.0844  | XM_341581    | Rn.163367 |
| A_44_P261326 | -0.93768 | -3.27729 | 0.003697 | -1.76914 | XM_342782    | Rn.1895   |
| A_44_P278639 | -0.93897 | -3.35496 | 0.003089 | -1.6188  | NM_053693    | Rn.116028 |
| A_44_P210563 | -0.93952 | -3.25811 | 0.003864 | -1.80615 | NM_012578    | Rn.3129   |
| A_44_P443976 | -0.9398  | -3.2626  | 0.003824 | -1.7975  | NM_031697    | Rn.44390  |
| A_44_P868060 | -0.94004 | -4.31057 | 0.000327 | 0.256138 | XR_005433    |           |
| A_44_P143974 | -0.94095 | -3.60331 | 0.001732 | -1.13424 | NM_001013235 | Rn.18315  |
| A_43_P21660  | -0.94104 | -4.6039  | 0.000164 | 0.827861 | NM_001007147 | Rn.100642 |
| A_43_P18787  | -0.9414  | -3.52178 | 0.002095 | -1.29385 | XM_342552    | Rn.9077   |
| A_44_P115461 | -0.94268 | -2.99425 | 0.007063 | -2.30979 | NM_017007    | Rn.91245  |
| A_44_P410062 | -0.94397 | -3.62267 | 0.001655 | -1.09627 | XR_005977    | Rn.197086 |
| A_43_P17406  | -0.94555 | -3.56182 | 0.001908 | -1.21551 | NM_001005541 | Rn.14968  |
| A_44_P794770 | -0.94696 | -3.20786 | 0.004338 | -1.9029  | NM_133560    | Rn.26957  |
| A_44_P973796 | -0.94702 | -3.19587 | 0.004459 | -1.92592 | DY319575     | Rn.165597 |
| A_43_P10574  | -0.94742 | -4.25752 | 0.000371 | 0.15218  | NM_001012012 | Rn.13268  |
| A_44_P164287 | -0.94768 | -4.14358 | 0.000485 | -0.07156 | NM_001013925 | Rn.72440  |
| A_44_P427089 | -0.94834 | -3.89974 | 0.000863 | -0.55147 | XM_341008    |           |
| A_44_P606344 | -0.94897 | -3.33258 | 0.003253 | -1.66219 | XM_343550    | Rn.214678 |
| A_44_P356876 | -0.95063 | -4.87652 | 8.67E-05 | 1.352647 | NM_001039002 | Rn.198270 |
| A_44_P113842 | -0.95164 | -3.81968 | 0.001042 | -0.70909 | NM_022210    | Rn.4210   |
| A_44_P365516 | -0.95207 | -3.65613 | 0.00153  | -1.03063 | BC059146     | Rn.3545   |
| A_43_P10725  | -0.95239 | -3.04435 | 0.006304 | -2.21506 | NM_001012468 | Rn.53248  |
| A_43_P16458  | -0.95617 | -3.80122 | 0.001088 | -0.74541 | NM_001011992 | Rn.32254  |
| A_44_P433334 | -0.95734 | -3.66368 | 0.001503 | -1.01581 | NM_001012197 | Rn.101146 |
| A_44_P466489 | -0.95739 | -3.0822  | 0.005784 | -2.14319 | NM_001007642 | Rn.1266   |
| A_44_P413294 | -0.9585  | -3.15311 | 0.004919 | -2.0079  | NM_022864    | Rn.10133  |
| A_44_P288796 | -0.95854 | -3.64723 | 0.001562 | -1.0481  | NM_001013125 | Rn.159939 |
| A_44_P609842 | -0.95905 | -3.00601 | 0.006878 | -2.28761 |              |           |
| A_44_P822078 | -0.95962 | -3.48448 | 0.002286 | -1.36671 | XM_576832    |           |
| A_44_P984248 | -0.95963 | -3.93127 | 0.000801 | -0.48938 | XM_222785    | Rn.28132  |
| A_42_P832417 | -0.95987 | -3.71298 | 0.001339 | -0.91896 | NM_012686    | Rn.105934 |
| A_44_P317520 | -0.96009 | -3.89718 | 0.000868 | -0.55651 | BC079339     | Rn.12944  |
| A_44_P286573 | -0.96102 | -4.03759 | 0.000623 | -0.28005 | AA955833     | Rn.203532 |
| A_43_P11752  | -0.96434 | -3.66447 | 0.0015   | -1.01425 | NM_013198    | Rn.6656   |
| A_44_P342908 | -0.96525 | -4.33915 | 0.000306 | 0.312097 | NM_001012076 | Rn.161745 |
| A_43_P17784  | -0.96692 | -3.85118 | 0.000967 | -0.64709 | NM_001025722 | Rn.20472  |
| A_44_P487021 | -0.96709 | -3.22271 | 0.004192 | -1.87435 | NM_001002830 | Rn.36357  |
| A_44_P698487 | -0.96725 | -3.34306 | 0.003175 | -1.64189 | XR_007600    | Rn.195696 |
| A_44_P776000 | -0.9679  | -3.70176 | 0.001375 | -0.94102 | XM_001061754 | Rn.215588 |
| A_44_P196757 | -0.96821 | -3.45633 | 0.002441 | -1.42164 | XM_224256    | Rn.206255 |
| A_44_P764653 | -0.9685  | -3.99149 | 0.000695 | -0.37081 | CO559017     | Rn.103732 |
| A_44_P166396 | -0.96998 | -4.06898 | 0.000579 | -0.21828 | XM_216348    | Rn.3404   |
| A_44_P111368 | -0.9704  | -3.08231 | 0.005783 | -2.14299 | NM_001037356 | Rn.115052 |
| A_44_P191903 | -0.97132 | -3.94575 | 0.000774 | -0.46087 | NM_053693    | Rn.116028 |
| A_44_P625415 | -0.97156 | -4.22269 | 0.000403 | 0.083845 | XM_220333    | Rn.44008  |
| A_44_P237886 | -0.97168 | -2.88155 | 0.009105 | -2.52107 | NM_031353    | Rn.54594  |
| A_44_P318891 | -0.97356 | -3.19171 | 0.004502 | -1.93392 | XR_007422    | Rn.195786 |
| A_44_P248541 | -0.9747  | -3.21344 | 0.004283 | -1.89218 | NM_001014263 | Rn.17193  |
| A_44_P111959 | -0.97489 | -6.34664 | 3.11E-06 | 4.010944 | BC087709     | Rn.10770  |

|              |          |          |          |          |              |           |
|--------------|----------|----------|----------|----------|--------------|-----------|
| A_44_P187827 | -0.9753  | -3.11962 | 0.00531  | -2.07189 | XM_213437    | Rn.162165 |
| A_44_P156439 | -0.97622 | -3.55027 | 0.00196  | -1.23813 | XM_344861    | Rn.198494 |
| A_44_P193210 | -0.97906 | -3.08299 | 0.005774 | -2.1417  | AY724483     | Rn.104592 |
| A_44_P114023 | -0.97983 | -3.4074  | 0.002735 | -1.51694 | NM_001047972 | Rn.44723  |
| A_44_P501593 | -0.98128 | -3.74016 | 0.001256 | -0.86554 | XM_230773    | Rn.3514   |
| A_44_P555525 | -0.98329 | -2.93825 | 0.008015 | -2.41511 | NM_001007625 | Rn.2881   |
| A_44_P347007 | -0.98573 | -3.13331 | 0.005147 | -2.04576 | XM_001058095 | Rn.1431   |
| A_44_P290231 | -0.99131 | -3.12235 | 0.005277 | -2.06667 | NM_013013    | Rn.97173  |
| A_44_P201511 | -0.99178 | -4.63903 | 0.000151 | 0.895878 | NM_001012087 | Rn.117620 |
| A_44_P386840 | -0.99281 | -3.34017 | 0.003197 | -1.64748 | NM_001013209 | Rn.129050 |
| A_44_P401170 | -0.99407 | -3.09524 | 0.005615 | -2.11838 | NM_001025014 | Rn.992    |
| A_44_P328311 | -0.99578 | -3.15084 | 0.004944 | -2.01224 | XR_007180    | Rn.197941 |
| A_44_P149161 | -0.99613 | -2.95476 | 0.007722 | -2.38413 | NM_198738    | Rn.100813 |
| A_44_P238710 | -0.99781 | -3.92811 | 0.000807 | -0.4956  | XM_218747    | Rn.101871 |
| A_43_P10867  | -1.00068 | -3.54991 | 0.001962 | -1.23884 | CB547678     |           |
| A_44_P239095 | -1.00192 | -4.10018 | 0.000538 | -0.15689 | XM_223440    | Rn.203482 |
| A_43_P15490  | -1.00254 | -4.80208 | 0.000103 | 1.2101   | NM_134377    | Rn.212755 |
| A_44_P123898 | -1.00282 | -3.33367 | 0.003245 | -1.66009 | XM_341452    |           |
| A_44_P214054 | -1.00415 | -2.89273 | 0.008879 | -2.50024 | NM_031722    | Rn.1022   |
| A_44_P162099 | -1.00419 | -3.39594 | 0.002809 | -1.53921 | NM_053296    | Rn.162569 |
| A_43_P15623  | -1.00434 | -3.76129 | 0.001195 | -0.82398 | NM_053414    | Rn.65536  |
| A_44_P479520 | -1.00546 | -3.26176 | 0.003832 | -1.79912 | XM_341907    | Rn.121213 |
| A_44_P905187 | -1.00547 | -3.52755 | 0.002067 | -1.28257 | XM_233231    | Rn.23812  |
| A_44_P170309 | -1.00656 | -4.48435 | 0.000217 | 0.595593 | XM_001064372 | Rn.91234  |
| A_44_P950583 | -1.00883 | -3.41496 | 0.002687 | -1.50222 | CO396335     | Rn.165102 |
| A_44_P500906 | -1.01088 | -3.1624  | 0.004815 | -1.99011 | NM_012788    | Rn.89331  |
| A_44_P912711 | -1.01221 | -3.21018 | 0.004315 | -1.89844 | XM_224429    | Rn.35614  |
| A_44_P929345 | -1.01292 | -3.73269 | 0.001278 | -0.88022 | XM_576703    | Rn.215588 |
| A_44_P426919 | -1.01334 | -3.12144 | 0.005288 | -2.06842 | XM_345601    |           |
| A_44_P328121 | -1.01696 | -3.06056 | 0.006076 | -2.18432 | NM_057207    | Rn.58137  |
| A_44_P978901 | -1.01726 | -3.49325 | 0.00224  | -1.34959 | XM_218747    | Rn.101871 |
| A_44_P296084 | -1.02016 | -4.16188 | 0.000465 | -0.03558 | CB544459     | Rn.8671   |
| A_44_P159296 | -1.02072 | -2.99417 | 0.007064 | -2.30994 | NM_001013929 | Rn.21454  |
| A_44_P100991 | -1.02072 | -3.67798 | 0.001454 | -0.98772 | XM_220404    | Rn.106999 |
| A_44_P519174 | -1.02111 | -4.32198 | 0.000319 | 0.278498 | NM_001015027 | Rn.107553 |
| A_44_P320955 | -1.02329 | -3.288   | 0.003607 | -1.74846 | NM_001012213 | Rn.115752 |
| A_44_P231994 | -1.0233  | -3.92708 | 0.000809 | -0.49764 | XM_231626    | Rn.68205  |
| A_44_P183241 | -1.02358 | -3.10951 | 0.005435 | -2.09118 | XM_221333    | Rn.20571  |
| A_43_P16889  | -1.02591 | -3.41346 | 0.002697 | -1.50515 | XM_220636    | Rn.3552   |
| A_44_P131031 | -1.02638 | -3.52242 | 0.002092 | -1.2926  | XR_006475    | Rn.196926 |
| A_44_P428872 | -1.02704 | -2.95938 | 0.007642 | -2.37545 | XM_341137    | Rn.8617   |
| A_44_P769703 | -1.02981 | -3.21047 | 0.004312 | -1.89788 | NM_178096    | Rn.8180   |
| A_42_P843366 | -1.03064 | -3.78033 | 0.001143 | -0.78652 | NM_022681    | Rn.48777  |
| A_44_P394401 | -1.03564 | -4.87997 | 8.60E-05 | 1.359247 | XM_230531    | Rn.19932  |
| A_44_P269675 | -1.03937 | -3.0476  | 0.006258 | -2.2089  | XM_001065667 | Rn.195775 |
| A_44_P251692 | -1.04279 | -2.9408  | 0.00797  | -2.41034 | NM_019257    | Rn.54448  |
| A_43_P15601  | -1.04306 | -4.3204  | 0.00032  | 0.275402 | NM_134351    | Rn.41420  |
| A_44_P118993 | -1.04578 | -3.22708 | 0.00415  | -1.86593 | NM_134351    | Rn.41420  |
| A_44_P108728 | -1.05234 | -3.13893 | 0.005081 | -2.03502 | CA512164     | Rn.201978 |
| A_44_P356658 | -1.05278 | -4.266   | 0.000364 | 0.168793 | XM_219716    | Rn.28086  |
| A_44_P433568 | -1.05514 | -2.92076 | 0.008337 | -2.44787 | XM_341882    | Rn.7634   |
| A_44_P420005 | -1.06014 | -3.64043 | 0.001587 | -1.06144 | NM_001047897 | Rn.202345 |
| A_44_P110392 | -1.06231 | -2.84945 | 0.009783 | -2.58075 |              |           |
| A_44_P917564 | -1.06249 | -3.93918 | 0.000786 | -0.4738  | NM_001044282 | Rn.1752   |
| A_44_P790861 | -1.06264 | -3.69124 | 0.001409 | -0.96167 |              |           |
| A_44_P189326 | -1.06692 | -4.17566 | 0.00045  | -0.00851 | NM_017319    | Rn.11527  |
| A_44_P215393 | -1.06753 | -3.05585 | 0.006142 | -2.19326 | NM_001025129 | Rn.1569   |
| A_44_P109887 | -1.06914 | -3.12635 | 0.005229 | -2.05905 | XM_214007    | Rn.6670   |

|              |          |          |          |          |              |           |
|--------------|----------|----------|----------|----------|--------------|-----------|
| A_42_P509365 | -1.06929 | -3.14179 | 0.005048 | -2.02955 | NM_031140    | Rn.2710   |
| A_44_P374848 | -1.06963 | -4.38819 | 0.000273 | 0.408003 | NM_024139    | Rn.11041  |
| A_44_P354008 | -1.07248 | -3.72763 | 0.001294 | -0.89016 | XM_224429    | Rn.35614  |
| A_44_P482267 | -1.07356 | -3.12736 | 0.005217 | -2.05712 | NM_134382    | Rn.212229 |
| A_43_P16591  | -1.07594 | -3.60758 | 0.001714 | -1.12587 | AY724483     | Rn.104592 |
| A_44_P461470 | -1.07792 | -4.38835 | 0.000273 | 0.40831  | NM_053714    | Rn.211841 |
| A_44_P699787 | -1.078   | -3.94204 | 0.000781 | -0.46818 | XM_221369    | Rn.3336   |
| A_44_P443138 | -1.08064 | -3.44016 | 0.002534 | -1.45316 | XM_001054273 | Rn.201277 |
| A_44_P116904 | -1.08116 | -3.96884 | 0.000733 | -0.4154  | XM_225314    | Rn.146842 |
| A_43_P11707  | -1.08119 | -3.87981 | 0.000904 | -0.59071 | NM_013090    | Rn.31977  |
| A_44_P484826 | -1.08174 | -3.3917  | 0.002837 | -1.54745 | NM_017276    | Rn.1441   |
| A_44_P856083 | -1.08279 | -3.76204 | 0.001193 | -0.82251 |              |           |
| A_44_P732939 | -1.08875 | -2.92692 | 0.008222 | -2.43634 | XM_220269    | Rn.18066  |
| A_44_P828123 | -1.08882 | -3.52778 | 0.002066 | -1.28212 | CO393245     | Rn.17209  |
| A_44_P687063 | -1.09454 | -2.87937 | 0.009149 | -2.52515 |              |           |
| A_43_P16511  | -1.10021 | -2.92872 | 0.008189 | -2.43297 | NM_001044300 | Rn.19946  |
| A_44_P651866 | -1.10089 | -3.85676 | 0.000955 | -0.63611 | XR_009004    | Rn.159826 |
| A_44_P846589 | -1.10464 | -3.44052 | 0.002532 | -1.45244 | NM_022229    | Rn.102058 |
| A_44_P109862 | -1.10669 | -5.37824 | 2.72E-05 | 2.29599  | NM_001047085 | Rn.36174  |
| A_44_P141351 | -1.11934 | -3.44598 | 0.0025   | -1.44182 | AY035551     | Rn.25058  |
| A_44_P855981 | -1.12135 | -3.48886 | 0.002263 | -1.35818 |              |           |
| A_44_P110158 | -1.12302 | -3.95796 | 0.000752 | -0.43683 | XM_232077    | Rn.214082 |
| A_44_P433542 | -1.126   | -2.99336 | 0.007077 | -2.31148 | NM_198132    | Rn.107690 |
| A_44_P112641 | -1.12738 | -4.94143 | 7.45E-05 | 1.476456 | XM_221214    | Rn.205861 |
| A_44_P108982 | -1.13111 | -3.16454 | 0.004792 | -1.98601 | XM_341354    | Rn.62159  |
| A_44_P283366 | -1.13155 | -4.33169 | 0.000311 | 0.297508 | NM_181081    | Rn.12618  |
| A_44_P379420 | -1.13262 | -4.81935 | 9.91E-05 | 1.243223 | NM_017088    | Rn.4000   |
| A_44_P903850 | -1.13435 | -2.8515  | 0.009738 | -2.57695 | NM_001042621 | Rn.1836   |
| A_44_P419757 | -1.13688 | -3.94714 | 0.000772 | -0.45813 | XM_346210    |           |
| A_44_P187144 | -1.14415 | -3.81555 | 0.001052 | -0.71722 | NM_080896    | Rn.23677  |
| A_44_P205301 | -1.14422 | -4.00187 | 0.000678 | -0.35037 | NM_183402    | Rn.144666 |
| A_44_P281435 | -1.14894 | -4.38392 | 0.000275 | 0.399662 | NM_001013923 | Rn.93910  |
| A_44_P206284 | -1.15026 | -3.97809 | 0.000717 | -0.39719 | XM_217496    | Rn.207764 |
| A_44_P458704 | -1.15889 | -4.46688 | 0.000227 | 0.561562 | NM_017073    | Rn.2204   |
| A_44_P426808 | -1.16124 | -3.9761  | 0.000721 | -0.4011  | NM_001013033 | Rn.99721  |
| A_42_P828898 | -1.16964 | -4.03832 | 0.000622 | -0.27861 | XM_219958    | Rn.105679 |
| A_43_P21284  | -1.17777 | -3.01953 | 0.00667  | -2.26205 | NM_001012072 | Rn.162528 |
| A_44_P365598 | -1.18163 | -4.18667 | 0.000439 | 0.013107 | NM_001012060 | Rn.16849  |
| A_44_P554271 | -1.18236 | -3.36088 | 0.003047 | -1.60732 | NM_001012235 | Rn.190651 |
| A_43_P22174  | -1.18905 | -4.96768 | 7.01E-05 | 1.526394 | NM_001014135 | Rn.3168   |
| A_44_P549445 | -1.19    | -3.76594 | 0.001182 | -0.81484 | NM_130755    | Rn.66581  |
| A_44_P149114 | -1.1902  | -2.94652 | 0.007867 | -2.3996  | NM_057213    | Rn.8109   |
| A_43_P12430  | -1.19174 | -3.57875 | 0.001834 | -1.18237 | NM_024374    | Rn.3239   |
| A_43_P11881  | -1.19527 | -5.53102 | 1.92E-05 | 2.576423 | NM_017253    | Rn.8273   |
| A_44_P112597 | -1.19667 | -3.6968  | 0.001391 | -0.95075 | XM_220423    | Rn.204170 |
| A_44_P196717 | -1.21055 | -2.9775  | 0.007336 | -2.34136 | XM_344970    | Rn.154758 |
| A_44_P496496 | -1.21685 | -3.71666 | 0.001327 | -0.91172 | XM_342857    | Rn.10787  |
| A_44_P852695 | -1.23085 | -3.37033 | 0.002981 | -1.58898 | XR_007221    | Rn.196906 |
| A_44_P594455 | -1.23274 | -3.47024 | 0.002363 | -1.3945  | XM_341907    | Rn.121213 |
| A_43_P10894  | -1.23765 | -3.93409 | 0.000796 | -0.48382 | NM_001025635 | Rn.48209  |
| A_44_P409336 | -1.24237 | -3.51661 | 0.002121 | -1.30396 | U56261       | Rn.107689 |
| A_44_P555389 | -1.24392 | -3.07815 | 0.005838 | -2.1509  | NM_138839    | Rn.109048 |
| A_43_P12816  | -1.24615 | -3.06355 | 0.006035 | -2.17864 | U45479       | Rn.22685  |
| A_44_P550364 | -1.24756 | -2.98026 | 0.00729  | -2.33616 | NM_080697    | Rn.36362  |
| A_44_P538779 | -1.25001 | -3.35783 | 0.003068 | -1.61324 | NM_001017385 | Rn.1819   |
| A_44_P625348 | -1.26332 | -3.14607 | 0.004999 | -2.02136 |              |           |
| A_43_P11613  | -1.27292 | -2.97037 | 0.007455 | -2.35478 | NM_012903    | Rn.10123  |
| A_44_P992854 | -1.28517 | -3.39782 | 0.002797 | -1.53556 | NM_057132    | Rn.107401 |

|               |          |          |          |          |              |           |
|---------------|----------|----------|----------|----------|--------------|-----------|
| A_44_P480605  | -1.28519 | -3.35511 | 0.003088 | -1.61851 | XM_001066230 | Rn.196993 |
| A_44_P243145  | -1.292   | -3.69775 | 0.001388 | -0.94888 | NM_021748    | Rn.13345  |
| A_44_P1040736 | -1.29428 | -4.22966 | 0.000396 | 0.097515 | NM_199384    | Rn.108012 |
| A_44_P196625  | -1.30009 | -3.27419 | 0.003723 | -1.77513 | XM_222253    | Rn.105079 |
| A_43_P18282   | -1.30497 | -4.22411 | 0.000401 | 0.086615 | XM_341483    | Rn.53930  |
| A_44_P858481  | -1.31791 | -3.96044 | 0.000748 | -0.43195 |              |           |
| A_44_P442161  | -1.31929 | -3.29046 | 0.003586 | -1.74371 | XM_342405    | Rn.24600  |
| A_44_P964633  | -1.33495 | -3.76832 | 0.001176 | -0.81016 | CO393123     | Rn.203361 |
| A_44_P104976  | -1.34123 | -4.53792 | 0.000192 | 0.699814 | NM_080583    | Rn.56138  |
| A_44_P515029  | -1.34738 | -3.17276 | 0.004702 | -1.97026 | XM_215469    | Rn.98152  |
| A_44_P293750  | -1.35762 | -3.68183 | 0.001441 | -0.98016 | XM_001066493 | Rn.115357 |
| A_44_P133044  | -1.36699 | -2.93484 | 0.008077 | -2.42151 |              |           |
| A_44_P338059  | -1.37093 | -4.63171 | 0.000154 | 0.881723 | XM_343264    | Rn.204679 |
| A_44_P127156  | -1.3759  | -3.65076 | 0.00155  | -1.04117 | M55017       |           |
| A_44_P480533  | -1.37601 | -4.01424 | 0.000659 | -0.32602 |              |           |
| A_44_P544023  | -1.37978 | -3.09798 | 0.00558  | -2.11316 | NM_001011995 | Rn.154526 |
| A_44_P902244  | -1.3828  | -3.42489 | 0.002626 | -1.48289 | XM_001066493 | Rn.115357 |
| A_43_P12839   | -1.39288 | -3.28852 | 0.003602 | -1.74746 | NM_053531    | Rn.34151  |
| A_44_P198396  | -1.39777 | -3.17063 | 0.004725 | -1.97434 | NM_031841    | Rn.83595  |
| A_44_P958966  | -1.41457 | -5.80308 | 1.04E-05 | 3.067006 | XR_005722    | Rn.160875 |
| A_42_P618436  | -1.42587 | -4.07546 | 0.00057  | -0.20552 | XM_235689    | Rn.17060  |
| A_44_P213415  | -1.44118 | -3.6434  | 0.001576 | -1.0556  | NM_031353    | Rn.54594  |
| A_44_P529743  | -1.45184 | -3.4711  | 0.002358 | -1.39283 | XM_574587    | Rn.11638  |
| A_44_P107219  | -1.46982 | -3.35138 | 0.003115 | -1.62576 | NM_207591    | Rn.8075   |
| A_44_P238314  | -1.4851  | -2.86196 | 0.009513 | -2.55753 | NM_019621    | Rn.9765   |
| A_44_P918103  | -1.50925 | -3.41022 | 0.002717 | -1.51144 |              |           |
| A_44_P177434  | -1.51232 | -3.85269 | 0.000964 | -0.64412 | NM_178105    | Rn.34370  |
| A_44_P488637  | -1.5264  | -3.15338 | 0.004916 | -2.00737 | NM_019351    | Rn.22514  |
| A_44_P180786  | -1.56348 | -3.74904 | 0.00123  | -0.84808 | XM_217372    | Rn.1410   |
| A_44_P217648  | -1.66614 | -4.23607 | 0.00039  | 0.110087 | NM_001037217 | Rn.154557 |
| A_44_P488022  | -1.66743 | -5.76861 | 1.12E-05 | 3.005493 | XM_576451    | Rn.17305  |
| A_44_P238312  | -1.67663 | -3.08466 | 0.005752 | -2.13851 | NM_019621    | Rn.9765   |
| A_44_P168842  | -1.68399 | -4.22397 | 0.000402 | 0.08634  | XR_006947    | Rn.197396 |
| A_44_P477322  | -1.69687 | -4.03898 | 0.000621 | -0.27731 | NM_031831    | Rn.1348   |
| A_43_P12141   | -1.79599 | -4.38202 | 0.000277 | 0.395949 | NM_021869    | Rn.1993   |
| A_44_P448181  | -1.79904 | -4.5501  | 0.000186 | 0.723483 | AY569014     | Rn.99876  |
| A_43_P18735   | -1.80003 | -3.75371 | 0.001217 | -0.83889 | NM_001030030 | Rn.100522 |
| A_43_P15367   | -1.83533 | -3.63936 | 0.001591 | -1.06354 | NM_139189    | Rn.201860 |
| A_44_P149148  | -1.92399 | -4.28889 | 0.000345 | 0.21367  | NM_017309    | Rn.42903  |

Table S4

Median: 0.009991979436682584

Geo: 0.013098146982064234

| Term                                            | Count | %      | PValue     |
|-------------------------------------------------|-------|--------|------------|
| GO:0032502~developmental process                | 29    | 24.37% | 0.0019038  |
| GO:0048513~organ development                    | 17    | 14.29% | 0.00264471 |
| GO:0048468~cell development                     | 16    | 13.45% | 0.00365645 |
| GO:0030154~cell differentiation                 | 19    | 15.97% | 0.00467809 |
| GO:0048869~cellular developmental process       | 19    | 15.97% | 0.00467809 |
| GO:0048731~system development                   | 19    | 15.97% | 0.00999198 |
| GO:0007275~multicellular organismal development | 21    | 17.65% | 0.0146788  |
| GO:0048856~anatomical structure development     | 20    | 16.81% | 0.02188862 |
| GO:0007399~nervous system development           | 10    | 8.40%  | 0.03763158 |
| GO:0009653~anatomical structure morphogenesis   | 11    | 9.24%  | 0.09039635 |
| GO:0032501~multicellular organismal process     | 27    | 22.69% | 0.44243405 |

Median: 0.007011150321556307

Geo: 0.01656665519371505

| Term                                        | Count | %      | PValue     |
|---------------------------------------------|-------|--------|------------|
| GO:0065007~biological regulation            | 36    | 30.25% | 0.00358475 |
| GO:0050789~regulation of biological process | 32    | 26.89% | 0.00624207 |
| GO:0050794~regulation of cellular process   | 29    | 24.37% | 0.00778023 |
| GO:0019222~regulation of metabolic process  | 13    | 10.92% | 0.43267287 |

Median: 0.05358450190602306

Geo: 0.03213539348414222

| Term                                                    | Count | %      | PValue     |
|---------------------------------------------------------|-------|--------|------------|
| GO:0048468~cell development                             | 16    | 13.45% | 0.00365645 |
| GO:0030154~cell differentiation                         | 19    | 15.97% | 0.00467809 |
| GO:0048869~cellular developmental process               | 19    | 15.97% | 0.00467809 |
| GO:0016265~death                                        | 11    | 9.24%  | 0.00950467 |
| GO:0008219~cell death                                   | 11    | 9.24%  | 0.00950467 |
| GO:0008283~cell proliferation                           | 11    | 9.24%  | 0.01140801 |
| GO:0006915~apoptosis                                    | 10    | 8.40%  | 0.01943025 |
| GO:0012501~programmed cell death                        | 10    | 8.40%  | 0.02096655 |
| GO:0048518~positive regulation of biological process    | 12    | 10.08% | 0.04580325 |
| GO:0048523~negative regulation of cellular process      | 11    | 9.24%  | 0.05139072 |
| GO:0048522~positive regulation of cellular process      | 11    | 9.24%  | 0.05577828 |
| GO:0008284~positive regulation of cell proliferation    | 5     | 4.20%  | 0.05685355 |
| GO:0043065~positive regulation of apoptosis             | 5     | 4.20%  | 0.06626229 |
| GO:0043068~positive regulation of programmed cell death | 5     | 4.20%  | 0.06854287 |
| GO:0048519~negative regulation of biological process    | 11    | 9.24%  | 0.07541499 |
| GO:0042127~regulation of cell proliferation             | 7     | 5.88%  | 0.08055805 |
| GO:0042981~regulation of apoptosis                      | 7     | 5.88%  | 0.09226092 |
| GO:0043067~regulation of programmed cell death          | 7     | 5.88%  | 0.09745399 |
| GO:0043066~negative regulation of apoptosis             | 4     | 3.36%  | 0.147503   |
| GO:0043069~negative regulation of programmed cell death | 4     | 3.36%  | 0.15030364 |

Median: 0.029321235494187657

Geo: 0.038754254726694026

| Term                                                | Count | %      | PValue     |
|-----------------------------------------------------|-------|--------|------------|
| GO:0051179~localization                             | 30    | 25.21% | 7.56E-04   |
| GO:0006810~transport                                | 25    | 21.01% | 0.00354746 |
| GO:0051234~establishment of localization            | 25    | 21.01% | 0.00574139 |
| GO:0022892~substrate-specific transporter activity  | 14    | 11.76% | 0.00815607 |
| GO:0022857~transmembrane transporter activity       | 13    | 10.92% | 0.00963755 |
| GO:0006812~cation transport                         | 9     | 7.56%  | 0.00979958 |
| GO:0030001~metal ion transport                      | 8     | 6.72%  | 0.01000551 |
| GO:0022891~substrate-specific transmembrane tra     | 12    | 10.08% | 0.01211268 |
| GO:0015674~di-, tri-valent inorganic cation transpo | 5     | 4.20%  | 0.01456401 |
| GO:0005215~transporter activity                     | 15    | 12.61% | 0.02445628 |
| GO:0022803~passive transmembrane transporter a      | 7     | 5.88%  | 0.02559288 |
| GO:0015267~channel activity                         | 7     | 5.88%  | 0.02559288 |
| GO:0015075~ion transmembrane transporter activi     | 10    | 8.40%  | 0.02773796 |
| GO:0006811~ion transport                            | 10    | 8.40%  | 0.02932124 |
| GO:0006816~calcium ion transport                    | 4     | 3.36%  | 0.03470812 |
| GO:0046873~metal ion transmembrane transporter      | 6     | 5.04%  | 0.04073964 |
| GO:0008324~cation transmembrane transporter ac      | 8     | 6.72%  | 0.04694332 |
| GO:0022838~substrate specific channel activity      | 6     | 5.04%  | 0.06781793 |
| GO:0022890~inorganic cation transmembrane tran      | 4     | 3.36%  | 0.09697663 |
| GO:0005216~ion channel activity                     | 5     | 4.20%  | 0.16194302 |
| GO:0015077~monovalent inorganic cation transme      | 3     | 2.52%  | 0.19009553 |
| GO:0005261~cation channel activity                  | 4     | 3.36%  | 0.20972592 |
| GO:0015672~monovalent inorganic cation transpor     | 4     | 3.36%  | 0.27459217 |
| GO:0005244~voltage-gated ion channel activity       | 3     | 2.52%  | 0.27903633 |
| GO:0022832~voltage-gated channel activity           | 3     | 2.52%  | 0.27903633 |
| GO:0022836~gated channel activity                   | 3     | 2.52%  | 0.50244347 |
| transport                                           | 4     | 3.36%  | 0.92879381 |

Median: 0.05103870428246421

Geo: 0.04066100997140925

| Term                                | Count | %     | PValue     |
|-------------------------------------|-------|-------|------------|
| gpi-anchor                          | 4     | 3.36% | 0.00498683 |
| GO:0048503~GPI anchor binding       | 4     | 3.36% | 0.00526782 |
| GO:0035091~phosphoinositide binding | 4     | 3.36% | 0.03295023 |
| GO:0008289~lipid binding            | 6     | 5.04% | 0.0510387  |
| lipoprotein                         | 6     | 5.04% | 0.0603392  |
| GO:0005543~phospholipid binding     | 4     | 3.36% | 0.08847203 |
| glycoprotein                        | 10    | 8.40% | 0.77916217 |

Median: 0.06375143382925563

Geo: 0.055121287609943094

| Term                                        | Count | %     | PValue     |
|---------------------------------------------|-------|-------|------------|
| GO:0000902~cell morphogenesis               | 9     | 7.56% | 0.00654198 |
| GO:0032989~cellular structure morphogenesis | 9     | 7.56% | 0.00654198 |
| GO:0051674~localization of cell             | 8     | 6.72% | 0.00843971 |

|                                                   |    |       |            |
|---------------------------------------------------|----|-------|------------|
| GO:0006928~cell motility                          | 8  | 6.72% | 0.00843971 |
| GO:0045664~regulation of neuron differentiation   | 3  | 2.52% | 0.02142502 |
| GO:0030182~neuron differentiation                 | 6  | 5.04% | 0.03435246 |
| GO:0007399~nervous system development             | 10 | 8.40% | 0.03763158 |
| GO:0009966~regulation of signal transduction      | 7  | 5.88% | 0.0550051  |
| GO:0048699~generation of neurons                  | 6  | 5.04% | 0.0551754  |
| GO:0009888~tissue development                     | 6  | 5.04% | 0.06087848 |
| GO:0030030~cell projection organization and bioge | 5  | 4.20% | 0.06255205 |
| GO:0032990~cell part morphogenesis                | 5  | 4.20% | 0.06255205 |
| GO:0048858~cell projection morphogenesis          | 5  | 4.20% | 0.06255205 |
| GO:0009611~response to wounding                   | 7  | 5.88% | 0.06495082 |
| GO:0022008~neurogenesis                           | 6  | 5.04% | 0.07722863 |
| GO:0048667~neuron morphogenesis during differe    | 4  | 3.36% | 0.08301481 |
| GO:0048812~neurite morphogenesis                  | 4  | 3.36% | 0.08301481 |
| GO:0050793~regulation of developmental process    | 5  | 4.20% | 0.0890998  |
| GO:0009653~anatomical structure morphogenesis     | 11 | 9.24% | 0.09039635 |
| GO:0016477~cell migration                         | 5  | 4.20% | 0.09174819 |
| GO:0040007~growth                                 | 5  | 4.20% | 0.09533805 |
| GO:0000904~cellular morphogenesis during differe  | 4  | 3.36% | 0.10288219 |
| GO:0031175~neurite development                    | 4  | 3.36% | 0.11410047 |
| GO:0048666~neuron development                     | 4  | 3.36% | 0.14890113 |
| GO:0045595~regulation of cell differentiation     | 3  | 2.52% | 0.29754846 |
| GO:0007243~protein kinase cascade                 | 4  | 3.36% | 0.38887732 |

Median: 0.06568497554225985

Geo: 0.07576685350125058

| Term                                        | Count | %     | PValue     |
|---------------------------------------------|-------|-------|------------|
| GO:0006665~sphingolipid metabolic process   | 4     | 3.36% | 0.00289589 |
| GO:0046519~sphingoid metabolic process      | 3     | 2.52% | 0.01366877 |
| GO:0006643~membrane lipid metabolic process | 4     | 3.36% | 0.06305875 |
| GO:0005783~endoplasmic reticulum            | 8     | 6.72% | 0.06568498 |
| GO:0044255~cellular lipid metabolic process | 5     | 4.20% | 0.38170379 |
| GO:0008610~lipid biosynthetic process       | 3     | 2.52% | 0.43645072 |
| GO:0006629~lipid metabolic process          | 5     | 4.20% | 0.52477172 |

Median: 0.12698373523485457

Geo: 0.1085747713659542

| Term                                          | Count | %     | PValue     |
|-----------------------------------------------|-------|-------|------------|
| GO:0030659~cytoplasmic vesicle membrane       | 4     | 3.36% | 0.00995806 |
| GO:0044433~cytoplasmic vesicle part           | 4     | 3.36% | 0.01786045 |
| GO:0012506~vesicle membrane                   | 4     | 3.36% | 0.02250049 |
| GO:0006886~intracellular protein transport    | 7     | 5.88% | 0.03008529 |
| GO:0030662~coated vesicle membrane            | 3     | 2.52% | 0.03867681 |
| GO:0046907~intracellular transport            | 9     | 7.56% | 0.04142686 |
| GO:0031982~vesicle                            | 6     | 5.04% | 0.05214339 |
| calcium                                       | 6     | 5.04% | 0.0881864  |
| GO:0016023~cytoplasmic membrane-bound vesicle | 5     | 4.20% | 0.10152223 |



|                                                   |   |       |            |
|---------------------------------------------------|---|-------|------------|
| GO:0031988~membrane-bound vesicle                 | 5 | 4.20% | 0.10963595 |
| GO:0015031~protein transport                      | 7 | 5.88% | 0.11611726 |
| GO:0031410~cytoplasmic vesicle                    | 5 | 4.20% | 0.12233789 |
| GO:0051649~establishment of cellular localization | 9 | 7.56% | 0.12639205 |
| GO:0031090~organelle membrane                     | 8 | 6.72% | 0.12757542 |
| GO:0051641~cellular localization                  | 9 | 7.56% | 0.13266272 |
| GO:0045184~establishment of protein localization  | 7 | 5.88% | 0.1517592  |
| GO:0022607~cellular component assembly            | 6 | 5.04% | 0.16807623 |
| GO:0008104~protein localization                   | 7 | 5.88% | 0.18813107 |
| GO:0006461~protein complex assembly               | 4 | 3.36% | 0.20488479 |
| GO:0033036~macromolecule localization             | 7 | 5.88% | 0.21509493 |
| GO:0030135~coated vesicle                         | 3 | 2.52% | 0.24447744 |
| GO:0016192~vesicle-mediated transport             | 5 | 4.20% | 0.27460159 |
| GO:0065003~macromolecular complex assembly        | 5 | 4.20% | 0.27726166 |
| alternative splicing                              | 7 | 5.88% | 0.28705867 |
| GO:0012505~endomembrane system                    | 4 | 3.36% | 0.49566323 |
| splice variant                                    | 6 | 5.04% | 0.50529718 |

Median: 0.09566593468640966

Geo: 0.12641338012275546

| Term                                          | Count | %     | PValue     |
|-----------------------------------------------|-------|-------|------------|
| GO:0048514~blood vessel morphogenesis         | 4     | 3.36% | 0.06705093 |
| GO:0009653~anatomical structure morphogenesis | 11    | 9.24% | 0.09039635 |
| GO:0001568~blood vessel development           | 4     | 3.36% | 0.09097701 |
| GO:0001944~vasculature development            | 4     | 3.36% | 0.09566593 |
| GO:0001525~angiogenesis                       | 3     | 2.52% | 0.17276244 |
| GO:0009887~organ morphogenesis                | 5     | 4.20% | 0.23150988 |
| GO:0048646~anatomical structure formation     | 3     | 2.52% | 0.244505   |

Median: 0.4181424454299303

Geo: 0.12708631750829097

| Term                                             | Count | %     | PValue     |
|--------------------------------------------------|-------|-------|------------|
| GO:0051258~protein polymerization                | 5     | 4.20% | 3.37E-04   |
| GO:0046785~microtubule polymerization            | 3     | 2.52% | 0.00122634 |
| propeptide:Removed in mature form                | 5     | 4.20% | 0.00483429 |
| GO:0007010~cytoskeleton organization and biogen  | 9     | 7.56% | 0.00554424 |
| GO:0051128~regulation of cellular component orga | 4     | 3.36% | 0.00739916 |
| GO:0031109~microtubule polymerization or depoly  | 3     | 2.52% | 0.00960909 |
| GO:0030036~actin cytoskeleton organization and b | 5     | 4.20% | 0.0231797  |
| Methylation                                      | 4     | 3.36% | 0.02721095 |
| GO:0030029~actin filament-based process          | 5     | 4.20% | 0.02752056 |
| GO:0006996~organelle organization and biogenesis | 11    | 9.24% | 0.04869729 |
| GO:0000226~microtubule cytoskeleton organization | 3     | 2.52% | 0.07868213 |
| GO:0050793~regulation of developmental process   | 5     | 4.20% | 0.0890998  |
| GO:0007017~microtubule-based process             | 4     | 3.36% | 0.11923121 |
| rno04810:Regulation of actin cytoskeleton        | 4     | 3.36% | 0.30419871 |

|                                                          |    |        |            |
|----------------------------------------------------------|----|--------|------------|
| cytoplasm                                                | 9  | 7.56%  | 0.40296436 |
| GO:0017111~nucleoside-triphosphatase activity            | 5  | 4.20%  | 0.41814245 |
| GO:0016462~pyrophosphatase activity                      | 5  | 4.20%  | 0.44739985 |
| GO:0016818~hydrolase activity, acting on acid anhydrides | 5  | 4.20%  | 0.45292712 |
| GO:0016817~hydrolase activity, acting on acid anhydrides | 5  | 4.20%  | 0.4598126  |
| GO:0042623~ATPase activity, coupled                      | 3  | 2.52%  | 0.51221187 |
| nucleotide-binding                                       | 6  | 5.04%  | 0.55462111 |
| GO:0016787~hydrolase activity                            | 13 | 10.92% | 0.58971636 |
| GO:0016887~ATPase activity                               | 3  | 2.52%  | 0.6078906  |
| atp-binding                                              | 4  | 3.36%  | 0.72056333 |
| GO:0032553~ribonucleotide binding                        | 6  | 5.04%  | 0.96851476 |
| GO:0032555~purine ribonucleotide binding                 | 6  | 5.04%  | 0.96851476 |
| GO:0017076~purine nucleotide binding                     | 6  | 5.04%  | 0.97692857 |
| GO:0000166~nucleotide binding                            | 7  | 5.88%  | 0.97699087 |
| GO:0005524~ATP binding                                   | 4  | 3.36%  | 0.9859679  |
| GO:0032559~adenyl ribonucleotide binding                 | 4  | 3.36%  | 0.98743697 |
| GO:0030554~adenyl nucleotide binding                     | 4  | 3.36%  | 0.99120971 |

Median: 0.22688672366390947

Geo: 0.17317491533194845

| Term                               | Count | %     | PValue     |
|------------------------------------|-------|-------|------------|
| GO:0040007~growth                  | 5     | 4.20% | 0.09533805 |
| GO:0016049~cell growth             | 3     | 2.52% | 0.22688672 |
| GO:0008361~regulation of cell size | 3     | 2.52% | 0.24009306 |

Median: 0.2165902008057497

Geo: 0.19738681531543417

| Term                             | Count | %     | PValue     |
|----------------------------------|-------|-------|------------|
| GO:0009611~response to wounding  | 7     | 5.88% | 0.06495082 |
| GO:0006950~response to stress    | 10    | 8.40% | 0.16020793 |
| GO:0006954~inflammatory response | 4     | 3.36% | 0.27297247 |
| GO:0006952~defense response      | 4     | 3.36% | 0.53442293 |

Median: 0.21605817549213288

Geo: 0.19865088907109454

| Term                            | Count | %     | PValue     |
|---------------------------------|-------|-------|------------|
| GO:0009888~tissue development   | 6     | 5.04% | 0.06087848 |
| GO:0001503~ossification         | 3     | 2.52% | 0.1920233  |
| GO:0031214~biomineral formation | 3     | 2.52% | 0.1920233  |
| GO:0046849~bone remodeling      | 3     | 2.52% | 0.24009306 |
| GO:0048771~tissue remodeling    | 3     | 2.52% | 0.26881863 |
| GO:0001501~skeletal development | 3     | 2.52% | 0.42416269 |

Median: 0.27889043603661545

Geo: 0.2011624834289807

| Term                        | Count | %      | PValue     |
|-----------------------------|-------|--------|------------|
| GO:0044444~cytoplasmic part | 27    | 22.69% | 0.03720137 |
| GO:0005737~cytoplasm        | 33    | 27.73% | 0.05258976 |
| GO:0005622~intracellular    | 51    | 42.86% | 0.13093863 |

|                                                   |    |        |            |
|---------------------------------------------------|----|--------|------------|
| GO:0043229~intracellular organelle                | 41 | 34.45% | 0.1348883  |
| GO:0043226~organelle                              | 41 | 34.45% | 0.13808623 |
| GO:0044424~intracellular part                     | 45 | 37.82% | 0.27889044 |
| GO:0043231~intracellular membrane-bound organelle | 33 | 27.73% | 0.30426919 |
| GO:0043227~membrane-bound organelle               | 33 | 27.73% | 0.30690129 |
| GO:0005623~cell                                   | 75 | 63.03% | 0.37068418 |
| GO:0044464~cell part                              | 74 | 62.18% | 0.54899273 |
| GO:0009987~cellular process                       | 64 | 53.78% | 0.863184   |

Median: 0.15196001235368436

Geo: 0.20457578861941178

| Term                             | Count | %     | PValue     |
|----------------------------------|-------|-------|------------|
| GO:0005783~endoplasmic reticulum | 8     | 6.72% | 0.06568498 |
| endoplasmic reticulum            | 5     | 4.20% | 0.15196001 |
| transmembrane region             | 10    | 8.40% | 0.85776306 |

Median: 0.13366383848907484

Geo: 0.22905797793122154

| Term                                     | Count | %     | PValue     |
|------------------------------------------|-------|-------|------------|
| GO:0006935~chemotaxis                    | 3     | 2.52% | 0.13340296 |
| GO:0042330~taxis                         | 3     | 2.52% | 0.13340296 |
| GO:0007610~behavior                      | 5     | 4.20% | 0.13366384 |
| GO:0007626~locomotory behavior           | 3     | 2.52% | 0.26660663 |
| GO:0042221~response to chemical stimulus | 6     | 5.04% | 0.99428592 |

Median: 0.21635803992904926

Geo: 0.2376488035116084

| Term                                 | Count | %     | PValue     |
|--------------------------------------|-------|-------|------------|
| GO:0005096~GTPase activator activity | 3     | 2.52% | 0.18339936 |
| GO:0030234~enzyme regulator activity | 7     | 5.88% | 0.20844452 |
| GO:0030695~GTPase regulator activity | 4     | 3.36% | 0.22427156 |
| GO:0008047~enzyme activator activity | 3     | 2.52% | 0.37203176 |

Median: 0.22736533800174696

Geo: 0.2824205975609152

| Term                                            | Count | %     | PValue     |
|-------------------------------------------------|-------|-------|------------|
| GO:0048545~response to steroid hormone stimulus | 3     | 2.52% | 0.12540959 |
| GO:0009719~response to endogenous stimulus      | 5     | 4.20% | 0.20139135 |
| GO:0009725~response to hormone stimulus         | 3     | 2.52% | 0.25333932 |
| GO:0042221~response to chemical stimulus        | 6     | 5.04% | 0.99428592 |

Median: 0.2986929605585694

Geo: 0.2956774482192189

| Term                                          | Count | %     | PValue     |
|-----------------------------------------------|-------|-------|------------|
| GO:0050790~regulation of catalytic activity   | 5     | 4.20% | 0.23023173 |
| GO:0065009~regulation of a molecular function | 5     | 4.20% | 0.29869296 |
| GO:0051338~regulation of transferase activity | 3     | 2.52% | 0.37589317 |

Median: 0.48319041257918804

Geo: 0.2994837815815022

| Term | Count | % | PValue |
|------|-------|---|--------|
|------|-------|---|--------|

|                                                   |   |       |            |
|---------------------------------------------------|---|-------|------------|
| GO:0007050~cell cycle arrest                      | 3 | 2.52% | 0.03831729 |
| GO:0045786~negative regulation of progression thr | 3 | 2.52% | 0.13139359 |
| GO:0000074~regulation of progression through cell | 3 | 2.52% | 0.48028099 |
| GO:0051726~regulation of cell cycle               | 3 | 2.52% | 0.48609983 |
| GO:0022402~cell cycle process                     | 3 | 2.52% | 0.74850836 |
| GO:0007049~cell cycle                             | 3 | 2.52% | 0.82007454 |

Median: 0.36012413372890034

Geo: 0.34114833908466563

| Term                                   | Count | %      | PValue     |
|----------------------------------------|-------|--------|------------|
| GO:0005615~extracellular space         | 16    | 13.45% | 0.10473089 |
| GO:0044421~extracellular region part   | 16    | 13.45% | 0.14825301 |
| GO:0005576~extracellular region signal | 16    | 13.45% | 0.28147749 |
| disulfide bond                         | 11    | 9.24%  | 0.36012413 |
| signal peptide                         | 10    | 8.40%  | 0.49379321 |
| Secreted                               | 9     | 7.56%  | 0.82725323 |
|                                        | 4     | 3.36%  | 0.83645974 |

Median: 0.41578343518711314

Geo: 0.3415495270682285

| Term                                    | Count | %     | PValue     |
|-----------------------------------------|-------|-------|------------|
| GO:0031090~organelle membrane           | 8     | 6.72% | 0.12757542 |
| GO:0031966~mitochondrial membrane       | 4     | 3.36% | 0.21886529 |
| GO:0005740~mitochondrial envelope       | 4     | 3.36% | 0.26119565 |
| GO:0044429~mitochondrial part           | 4     | 3.36% | 0.38474803 |
| GO:0005743~mitochondrial inner membrane | 3     | 2.52% | 0.41578344 |
| GO:0019866~organelle inner membrane     | 3     | 2.52% | 0.44419225 |
| GO:0031975~envelope                     | 4     | 3.36% | 0.47119996 |
| GO:0031967~organelle envelope           | 4     | 3.36% | 0.47119996 |
| GO:0005739~mitochondrion                | 6     | 5.04% | 0.54972855 |

Median: 0.6692685796256796

Geo: 0.34206884401432364

| Term                                    | Count | %      | PValue     |
|-----------------------------------------|-------|--------|------------|
| GO:0005886~plasma membrane              | 21    | 17.65% | 0.00824633 |
| membrane                                | 23    | 19.33% | 0.04504188 |
| GO:0044459~plasma membrane part         | 15    | 12.61% | 0.07477456 |
| GO:0005887~integral to plasma membrane  | 8     | 6.72%  | 0.35720236 |
| GO:0016020~membrane                     | 42    | 35.29% | 0.37195217 |
| GO:0031226~intrinsic to plasma membrane | 8     | 6.72%  | 0.3720425  |
| transmembrane                           | 13    | 10.92% | 0.66010746 |
| GO:0044425~membrane part                | 32    | 26.89% | 0.6784297  |
| transmembrane protein                   | 3     | 2.52%  | 0.77150498 |
| topological domain:Cytoplasmic          | 8     | 6.72%  | 0.85461623 |
| transmembrane region                    | 10    | 8.40%  | 0.85776306 |
| GO:0016021~integral to membrane         | 24    | 20.17% | 0.94918057 |
| GO:0031224~intrinsic to membrane        | 24    | 20.17% | 0.95202413 |
| topological domain:Extracellular        | 5     | 4.20%  | 0.95580871 |

|                                                    |                                  |
|----------------------------------------------------|----------------------------------|
| Median: 0.6697869754096847                         | Geo: 0.3551016719532347          |
| Term                                               | Count      %              PValue |
| GO:0007242~intracellular signaling cascade         | 14      11.76%    0.0380455      |
| GO:0007154~cell communication                      | 27      22.69%    0.54613563     |
| GO:0007165~signal transduction                     | 22      18.49%    0.79343832     |
| GO:0007166~cell surface receptor linked signal tra | 11      9.24%     0.9644815      |

|                                               |                                  |
|-----------------------------------------------|----------------------------------|
| Median: 0.4580394280214789                    | Geo: 0.3817041963201787          |
| Term                                          | Count      %              PValue |
| GO:0003714~transcription corepressor activity | 3      2.52%    0.10708232       |
| GO:0016564~transcription repressor activity   | 3      2.52%    0.33159958       |
| GO:0003712~transcription cofactor activity    | 3      2.52%    0.45803943       |
| GO:0008134~transcription factor binding       | 3      2.52%    0.65248975       |
| GO:0030528~transcription regulator activity   | 7      5.88%    0.76353048       |

|                                                   |                                  |
|---------------------------------------------------|----------------------------------|
| Median: 0.9948670647412782                        | Geo: 0.38869644747229287         |
| Term                                              | Count      %              PValue |
| GO:0007267~cell-cell signaling                    | 10      8.40%    0.02010251      |
| GO:0007268~synaptic transmission                  | 6      5.04%    0.08269739       |
| GO:0019226~transmission of nerve impulse          | 6      5.04%    0.1264984        |
| GO:0003008~system process                         | 9      7.56%    0.96937986       |
| GO:0050877~neurological system process            | 6      5.04%    0.99486706       |
| GO:0007186~G-protein coupled receptor protein sig | 5      4.20%    0.99888011       |
| GO:0001584~rhodopsin-like receptor activity       | 3      2.52%    0.99985866       |
| GO:0004930~G-protein coupled receptor activity    | 3      2.52%    0.99994731       |
| GO:0004888~transmembrane receptor activity        | 4      3.36%    0.99995356       |

|                                         |                                  |
|-----------------------------------------|----------------------------------|
| Median: 0.7490033588699851              | Geo: 0.4160549356873782          |
| Term                                    | Count      %              PValue |
| GO:0031090~organelle membrane           | 8      6.72%    0.12757542       |
| GO:0044446~intracellular organelle part | 13      10.92%   0.74900336      |
| GO:0044422~organelle part               | 13      10.92%   0.75370476      |

|                                         |                                  |
|-----------------------------------------|----------------------------------|
| Median: 0.4748806082394614              | Geo: 0.45696154314135434         |
| Term                                    | Count      %              PValue |
| GO:0005509~calcium ion binding          | 7      5.88%    0.30641968       |
| GO:0043167~ion binding                  | 20      16.81%   0.35301025      |
| GO:0046872~metal ion binding            | 19      15.97%   0.41200894      |
| GO:0043169~cation binding               | 17      14.29%   0.53775228      |
| GO:0008270~zinc ion binding             | 9      7.56%    0.58962396       |
| GO:0046914~transition metal ion binding | 11      9.24%    0.64433232      |

|                            |                                  |
|----------------------------|----------------------------------|
| Median: 0.6108548056123693 | Geo: 0.46366787538666515         |
| Term                       | Count      %              PValue |

|                                                  |   |       |            |
|--------------------------------------------------|---|-------|------------|
| GO:0009055~electron carrier activity             | 4 | 3.36% | 0.16010272 |
| rno00190:Oxidative phosphorylation               | 3 | 2.52% | 0.29465413 |
| GO:0005739~mitochondrion                         | 6 | 5.04% | 0.54972855 |
| GO:0006091~generation of precursor metabolites a | 4 | 3.36% | 0.67198106 |
| GO:0006118~electron transport                    | 3 | 2.52% | 0.72145424 |
| GO:0016491~oxidoreductase activity               | 5 | 4.20% | 0.79034494 |

Median: 0.5781882914454173

Geo: 0.4860358594698407

| Term                                           | Count | %     | PValue     |
|------------------------------------------------|-------|-------|------------|
| GO:0005856~cytoskeleton                        | 8     | 6.72% | 0.18425912 |
| GO:0043232~intracellular non-membrane-bound or | 10    | 8.40% | 0.57818829 |
| GO:0043228~non-membrane-bound organelle        | 10    | 8.40% | 0.57818829 |
| GO:0044430~cytoskeletal part                   | 4     | 3.36% | 0.64268789 |
| GO:0005198~structural molecule activity        | 5     | 4.20% | 0.68513139 |

Median: 0.9423352055185812

Geo: 0.5612926576195539

| Term                                             | Count | %     | PValue     |
|--------------------------------------------------|-------|-------|------------|
| GO:0006119~oxidative phosphorylation             | 3     | 2.52% | 0.09294528 |
| GO:0006091~generation of precursor metabolites a | 4     | 3.36% | 0.67198106 |
| GO:0016310~phosphorylation                       | 3     | 2.52% | 0.94233521 |
| GO:0006793~phosphorus metabolic process          | 3     | 2.52% | 0.97292307 |
| GO:0006796~phosphate metabolic process           | 3     | 2.52% | 0.97292307 |

Median: 0.9706858737440671

Geo: 0.6755664698446382

| Term                                               | Count | %     | PValue     |
|----------------------------------------------------|-------|-------|------------|
| rno04012:ErbB signaling pathway                    | 3     | 2.52% | 0.19756883 |
| kinase                                             | 3     | 2.52% | 0.74437278 |
| GO:0016301~kinase activity                         | 3     | 2.52% | 0.97068587 |
| GO:0016772~transferase activity, transferring phos | 3     | 2.52% | 0.98728428 |
| GO:0016740~transferase activity                    | 4     | 3.36% | 0.99841383 |

Median: 0.7330494427919996

Geo: 0.689925413309536

| Term          | Count | %     | PValue     |
|---------------|-------|-------|------------|
| Ionic channel | 3     | 2.52% | 0.48234063 |
| ion transport | 3     | 2.52% | 0.73304944 |
| transport     | 4     | 3.36% | 0.92879381 |

Median: 0.7762607275814594

Geo: 0.7381337367173091

| Term                                            | Count | %      | PValue     |
|-------------------------------------------------|-------|--------|------------|
| GO:0019538~protein metabolic process            | 20    | 16.81% | 0.51096511 |
| GO:0043170~macromolecule metabolic process      | 32    | 26.89% | 0.65084492 |
| GO:0044260~cellular macromolecule metabolic pro | 17    | 14.29% | 0.72895769 |
| GO:0044238~primary metabolic process            | 36    | 30.25% | 0.76037186 |
| GO:0044267~cellular protein metabolic process   | 16    | 13.45% | 0.79214959 |
| GO:0044237~cellular metabolic process           | 35    | 29.41% | 0.81029799 |

|                                         |    |        |            |
|-----------------------------------------|----|--------|------------|
| GO:0008152~metabolic process            | 39 | 32.77% | 0.85052368 |
| GO:0043283~biopolymer metabolic process | 19 | 15.97% | 0.87567903 |

Median: 0.796723032466517

Geo: 0.7558166759021745

| Term                                                        | Count | %      | PValue     |
|-------------------------------------------------------------|-------|--------|------------|
| GO:0019222~regulation of metabolic process                  | 13    | 10.92% | 0.43267287 |
| GO:0010468~regulation of gene expression                    | 11    | 9.24%  | 0.53827834 |
| GO:0031323~regulation of cellular metabolic process         | 11    | 9.24%  | 0.62702663 |
| GO:0045449~regulation of transcription                      | 9     | 7.56%  | 0.71296839 |
| GO:0006355~regulation of transcription, DNA-dependent       | 8     | 6.72%  | 0.74680584 |
| GO:0019219~regulation of nucleobase, nucleoside, nucleotide | 9     | 7.56%  | 0.74927528 |
| GO:0030528~transcription regulator activity                 | 7     | 5.88%  | 0.76353048 |
| GO:0006350~transcription                                    | 9     | 7.56%  | 0.77827361 |
| GO:0006351~transcription, DNA-dependent                     | 8     | 6.72%  | 0.79672303 |
| GO:0032774~RNA biosynthetic process                         | 8     | 6.72%  | 0.79846712 |
| GO:0010467~gene expression                                  | 13    | 10.92% | 0.81665599 |
| GO:0006139~nucleobase, nucleoside, nucleotide               | 14    | 11.76% | 0.82572682 |
| GO:0016070~RNA metabolic process                            | 9     | 7.56%  | 0.8732745  |
| GO:0043283~biopolymer metabolic process                     | 19    | 15.97% | 0.87567903 |
| GO:0003700~transcription factor activity                    | 4     | 3.36%  | 0.89256127 |
| GO:0003677~DNA binding                                      | 7     | 5.88%  | 0.91650031 |
| GO:0003676~nucleic acid binding                             | 12    | 10.08% | 0.92266281 |

Median: 0.7346365499807694

Geo: 0.7567949594906387

| Term                                          | Count | %     | PValue     |
|-----------------------------------------------|-------|-------|------------|
| GO:0006412~translation                        | 4     | 3.36% | 0.6856941  |
| GO:0009058~biosynthetic process               | 8     | 6.72% | 0.73223591 |
| GO:0009059~macromolecule biosynthetic process | 5     | 4.20% | 0.73703719 |
| GO:0044249~cellular biosynthetic process      | 5     | 4.20% | 0.88642519 |

Median: 0.8973573679866338

Geo: 0.8617550111058944

| Term          | Count | %     | PValue     |
|---------------|-------|-------|------------|
| zinc-finger   | 3     | 2.52% | 0.77262736 |
| metal-binding | 5     | 4.20% | 0.89735737 |
| zinc          | 3     | 2.52% | 0.92303026 |

Median: 0.9736314715800498

Geo: 0.9595490109139895

| Term                                               | Count | %     | PValue     |
|----------------------------------------------------|-------|-------|------------|
| GO:0043687~post-translational protein modification | 5     | 4.20% | 0.92717983 |
| GO:0006464~protein modification process            | 5     | 4.20% | 0.97363147 |
| GO:0043412~biopolymer modification                 | 5     | 4.20% | 0.97868494 |

Median: 0.9468890540524483

Geo: 0.9630591152749226

| Term                                  | Count | %      | PValue     |
|---------------------------------------|-------|--------|------------|
| GO:0004871~signal transducer activity | 14    | 11.76% | 0.94688905 |

|                                          |    |        |            |
|------------------------------------------|----|--------|------------|
| GO:0060089~molecular transducer activity | 14 | 11.76% | 0.94688905 |
| GO:0004872~receptor activity             | 9  | 7.56%  | 0.99623236 |



Table S5

Median: 6.748340700062148E-4

Geo: 6.426805056597486E-4

| Term                                            | Count | %      | PValue     |
|-------------------------------------------------|-------|--------|------------|
| GO:0032502~developmental process                | 45    | 29.61% | 4.78E-06   |
| GO:0048869~cellular developmental process       | 30    | 19.74% | 2.99E-05   |
| GO:0030154~cell differentiation                 | 30    | 19.74% | 2.99E-05   |
| GO:0007275~multicellular organismal development | 32    | 21.05% | 5.16E-04   |
| GO:0048731~system development                   | 28    | 18.42% | 6.75E-04   |
| GO:0048856~anatomical structure development     | 30    | 19.74% | 0.00152982 |
| GO:0048513~organ development                    | 22    | 14.47% | 0.00159909 |
| GO:0009653~anatomical structure morphogenesis   | 15    | 9.87%  | 0.05367044 |
| GO:0032501~multicellular organismal process     | 43    | 28.29% | 0.09576885 |

Median: 0.0036852104896518256

Geo: 0.00177884271287579

| Term                                                 | Count | %      | PValue     |
|------------------------------------------------------|-------|--------|------------|
| GO:0042127~regulation of cell proliferation          | 15    | 9.87%  | 8.15E-05   |
| GO:0008283~cell proliferation                        | 18    | 11.84% | 1.21E-04   |
| GO:0008285~negative regulation of cell proliferation | 8     | 5.26%  | 0.00304683 |
| GO:0008284~positive regulation of cell proliferation | 8     | 5.26%  | 0.00432359 |
| GO:0048523~negative regulation of cellular process   | 16    | 10.53% | 0.01161529 |
| GO:0048519~negative regulation of biological process | 16    | 10.53% | 0.02091638 |

Median: 0.011553468381934585

Geo: 0.003868567826100308

| Term                                                    | Count | %      | PValue     |
|---------------------------------------------------------|-------|--------|------------|
| GO:0032502~developmental process                        | 45    | 29.61% | 4.78E-06   |
| GO:0048869~cellular developmental process               | 30    | 19.74% | 2.99E-05   |
| GO:0030154~cell differentiation                         | 30    | 19.74% | 2.99E-05   |
| GO:0048468~cell development                             | 23    | 15.13% | 2.67E-04   |
| GO:0008219~cell death                                   | 14    | 9.21%  | 0.0066416  |
| GO:0016265~death                                        | 14    | 9.21%  | 0.0066416  |
| GO:0006915~apoptosis                                    | 13    | 8.55%  | 0.01155347 |
| GO:0012501~programmed cell death                        | 13    | 8.55%  | 0.01272079 |
| GO:0042981~regulation of apoptosis                      | 10    | 6.58%  | 0.03207116 |
| GO:0043067~regulation of programmed cell death          | 10    | 6.58%  | 0.03482955 |
| GO:0043066~negative regulation of apoptosis             | 5     | 3.29%  | 0.11766584 |
| GO:0043069~negative regulation of programmed cell death | 5     | 3.29%  | 0.12049239 |
| GO:0006916~anti-apoptosis                               | 3     | 1.97%  | 0.37109276 |

Median: 0.011139084952939873

Geo: 0.004790451489712513

| Term                                                 | Count | %      | PValue   |
|------------------------------------------------------|-------|--------|----------|
| GO:0048518~positive regulation of biological process | 26    | 17.11% | 1.34E-06 |
| GO:0032502~developmental process                     | 45    | 29.61% | 4.78E-06 |
| GO:0048522~positive regulation of cellular process   | 23    | 15.13% | 1.10E-05 |
| GO:0065007~biological regulation                     | 55    | 36.18% | 1.57E-05 |
| GO:0050794~regulation of cellular process            | 46    | 30.26% | 2.45E-05 |
| Transcription                                        | 15    | 9.87%  | 1.83E-04 |
| GO:0050789~regulation of biological process          | 47    | 30.92% | 2.50E-04 |
| Transcription regulation                             | 14    | 9.21%  | 5.62E-04 |
| GO:0045941~positive regulation of transcription      | 10    | 6.58%  | 7.67E-04 |

|                                                     |    |        |            |
|-----------------------------------------------------|----|--------|------------|
| GO:0045935~positive regulation of nucleobase, nucl  | 10 | 6.58%  | 0.00109242 |
| GO:0031325~positive regulation of cellular metaboli | 10 | 6.58%  | 0.00394122 |
| dna-binding                                         | 13 | 8.55%  | 0.00417032 |
| GO:0043283~biopolymer metabolic process             | 45 | 29.61% | 0.00463287 |
| GO:0006355~regulation of transcription, DNA-depen   | 22 | 14.47% | 0.00601692 |
| GO:0009893~positive regulation of metabolic proces  | 10 | 6.58%  | 0.00619934 |
| GO:0003677~DNA binding                              | 23 | 15.13% | 0.00621432 |
| nucleus                                             | 22 | 14.47% | 0.00675776 |
| GO:0016070~RNA metabolic process                    | 26 | 17.11% | 0.00861611 |
| GO:0006351~transcription, DNA-dependent             | 22 | 14.47% | 0.01101814 |
| GO:0032774~RNA biosynthetic process                 | 22 | 14.47% | 0.01126003 |
| GO:0003676~nucleic acid binding                     | 32 | 21.05% | 0.01151421 |
| GO:0019219~regulation of nucleobase, nucleoside, r  | 23 | 15.13% | 0.01208922 |
| GO:0045449~regulation of transcription              | 22 | 14.47% | 0.01618277 |
| GO:0019222~regulation of metabolic process          | 25 | 16.45% | 0.01911386 |
| GO:0003700~transcription factor activity            | 14 | 9.21%  | 0.01981277 |
| GO:0030528~transcription regulator activity         | 18 | 11.84% | 0.02085853 |
| GO:0005634~nucleus                                  | 35 | 23.03% | 0.02523932 |
| GO:0006139~nucleobase, nucleoside, nucleotide an    | 32 | 21.05% | 0.02781943 |
| GO:0006350~transcription                            | 22 | 14.47% | 0.03053968 |
| GO:0010468~regulation of gene expression            | 22 | 14.47% | 0.03448082 |
| GO:0031323~regulation of cellular metabolic proces  | 23 | 15.13% | 0.03705001 |
| GO:0045893~positive regulation of transcription, DN | 6  | 3.95%  | 0.05128254 |
| GO:0045944~positive regulation of transcription fro | 5  | 3.29%  | 0.06361487 |
| GO:0010467~gene expression                          | 27 | 17.76% | 0.11393444 |
| GO:0006357~regulation of transcription from RNA p   | 7  | 4.61%  | 0.14555294 |
| GO:0016563~transcription activator activity         | 5  | 3.29%  | 0.20323926 |
| GO:0006366~transcription from RNA polymerase II p   | 7  | 4.61%  | 0.30991157 |
| GO:0046983~protein dimerization activity            | 4  | 2.63%  | 0.5722885  |

Median: 0.00888381322916805

Geo: 0.005713472237800778

| Term                                    | Count | %      | PValue     |
|-----------------------------------------|-------|--------|------------|
| GO:0046872~metal ion binding            | 38    | 25.00% | 9.66E-04   |
| GO:0043167~ion binding                  | 38    | 25.00% | 0.00152226 |
| GO:0046914~transition metal ion binding | 26    | 17.11% | 0.00400902 |
| GO:0008270~zinc ion binding             | 20    | 13.16% | 0.0137586  |
| GO:0043169~cation binding               | 32    | 21.05% | 0.01799826 |
| metal-binding                           | 18    | 11.84% | 0.02383083 |

Median: 0.004267893538795904

Geo: 0.005825031646840147

| Term                             | Count | %     | PValue     |
|----------------------------------|-------|-------|------------|
| zinc finger                      | 6     | 3.95% | 2.17E-05   |
| DNA binding                      | 7     | 4.61% | 5.82E-04   |
| zinc finger region:C2H2-type 3   | 4     | 2.63% | 0.00360219 |
| zinc finger region:C2H2-type 2   | 4     | 2.63% | 0.00403583 |
| zinc finger region:C2H2-type 1   | 4     | 2.63% | 0.00449996 |
| zinc-finger                      | 9     | 5.92% | 0.07610532 |
| IPR007087:Zinc finger, C2H2-type | 5     | 3.29% | 0.10183541 |
| zinc                             | 10    | 6.58% | 0.20726519 |

Median: 0.007826510251834073

Geo: 0.007611786276558587

| Term                                             | Count | %     | PValue     |
|--------------------------------------------------|-------|-------|------------|
| GO:0001569~patterning of blood vessels           | 4     | 2.63% | 2.96E-04   |
| GO:0007389~pattern specification process         | 7     | 4.61% | 0.00204985 |
| GO:0048646~anatomical structure formation        | 7     | 4.61% | 0.00218479 |
| GO:0009880~embryonic pattern specification       | 4     | 2.63% | 0.00361935 |
| GO:0001525~angiogenesis                          | 6     | 3.95% | 0.00412935 |
| GO:0048754~branching morphogenesis of a tube     | 4     | 2.63% | 0.00484675 |
| GO:0001763~morphogenesis of a branching structur | 4     | 2.63% | 0.00669642 |
| GO:0009887~organ morphogenesis                   | 10    | 6.58% | 0.00782651 |
| GO:0048514~blood vessel morphogenesis            | 6     | 3.95% | 0.01028697 |
| GO:0001568~blood vessel development              | 6     | 3.95% | 0.01730714 |
| GO:0035295~tube development                      | 6     | 3.95% | 0.0176862  |
| GO:0001944~vasculature development               | 6     | 3.95% | 0.01885633 |
| GO:0035239~tube morphogenesis                    | 5     | 3.29% | 0.0231404  |
| GO:0009790~embryonic development                 | 7     | 4.61% | 0.044897   |
| GO:0009653~anatomical structure morphogenesis    | 15    | 9.87% | 0.05367044 |

Median: 0.05457297922436276

Geo: 0.014620536960131459

| Term                                                | Count | %     | PValue     |
|-----------------------------------------------------|-------|-------|------------|
| zinc finger                                         | 6     | 3.95% | 2.17E-05   |
| IPR003070:Orphan nuclear receptor                   | 3     | 1.97% | 2.97E-04   |
| PIRSF002524:probable hormone receptor N10, nucle    | 3     | 1.97% | 3.95E-04   |
| DNA binding                                         | 7     | 4.61% | 5.82E-04   |
| region of interest:Ligand-binding                   | 3     | 1.97% | 0.02103787 |
| IPR001723:Steroid hormone receptor                  | 3     | 1.97% | 0.05028855 |
| zinc finger region:NR C4-type                       | 3     | 1.97% | 0.05111912 |
| DNA-binding region:Nuclear receptor                 | 3     | 1.97% | 0.05111912 |
| IPR001628:Zinc finger, nuclear hormone receptor-tyf | 3     | 1.97% | 0.05802684 |
| IPR000536:Nuclear hormone receptor, ligand-binding  | 3     | 1.97% | 0.05802684 |
| IPR008946:Nuclear hormone receptor, ligand-binding  | 3     | 1.97% | 0.05802684 |
| GO:0003707~steroid hormone receptor activity        | 3     | 1.97% | 0.06048219 |
| SM00430:HOLI                                        | 3     | 1.97% | 0.07872766 |
| SM00399:ZnF_C4                                      | 3     | 1.97% | 0.07872766 |
| GO:0043565~sequence-specific DNA binding            | 7     | 4.61% | 0.11289371 |
| GO:0004879~ligand-dependent nuclear receptor act    | 3     | 1.97% | 0.12910237 |

Median: 0.027819433619917497

Geo: 0.0306394706702835

| Term                                             | Count | %      | PValue     |
|--------------------------------------------------|-------|--------|------------|
| GO:0043283~biopolymer metabolic process          | 45    | 29.61% | 0.00463287 |
| GO:0009987~cellular process                      | 101   | 66.45% | 0.01801886 |
| GO:0044237~cellular metabolic process            | 64    | 42.11% | 0.02644205 |
| GO:0006139~nucleobase, nucleoside, nucleotide an | 32    | 21.05% | 0.02781943 |
| GO:0044238~primary metabolic process             | 62    | 40.79% | 0.07000976 |
| GO:0008152~metabolic process                     | 68    | 44.74% | 0.0740469  |
| GO:0043170~macromolecule metabolic process       | 54    | 35.53% | 0.07963106 |

Median: 0.043534823014015345

Geo: 0.042953132282386765

| Term                                                 | Count | %     | PValue     |
|------------------------------------------------------|-------|-------|------------|
| GO:0019932~second-messenger-mediated signaling       | 7     | 4.61% | 0.0298774  |
| GO:0007200~G-protein signaling, coupled to IP3 sec   | 4     | 2.63% | 0.03872718 |
| GO:0043085~positive regulation of catalytic activity | 6     | 3.95% | 0.04834246 |
| GO:0048015~phosphoinositide-mediated signaling       | 4     | 2.63% | 0.06085438 |

Median: 0.04555127796655499

Geo: 0.04839470743609883

| Term                                             | Count | %     | PValue     |
|--------------------------------------------------|-------|-------|------------|
| GO:0030335~positive regulation of cell migration | 3     | 1.97% | 0.01085114 |
| GO:0040017~positive regulation of locomotion     | 3     | 1.97% | 0.01842662 |
| GO:0051272~positive regulation of cell motility  | 3     | 1.97% | 0.01842662 |
| GO:0016477~cell migration                        | 7     | 4.61% | 0.03362988 |
| GO:0006928~cell motility                         | 8     | 5.26% | 0.04555128 |
| GO:0051674~localization of cell                  | 8     | 5.26% | 0.04555128 |
| GO:0030334~regulation of cell migration          | 3     | 1.97% | 0.10050712 |
| GO:0051270~regulation of cell motility           | 3     | 1.97% | 0.12495972 |
| GO:0040012~regulation of locomotion              | 3     | 1.97% | 0.14485459 |
| GO:0040011~locomotion                            | 3     | 1.97% | 0.15065598 |

Median: 0.04022831394862833

Geo: 0.04844946335952177

| Term                                            | Count | %      | PValue     |
|-------------------------------------------------|-------|--------|------------|
| GO:0005622~intracellular                        | 77    | 50.66% | 0.00474    |
| GO:0043231~intracellular membrane-bound organel | 54    | 35.53% | 0.01200889 |
| GO:0043227~membrane-bound organelle             | 54    | 35.53% | 0.01229198 |
| GO:0005634~nucleus                              | 35    | 23.03% | 0.02523932 |
| GO:0044424~intracellular part                   | 68    | 44.74% | 0.03572386 |
| GO:0043229~intracellular organelle              | 59    | 38.82% | 0.04022831 |
| GO:0043226~organelle                            | 59    | 38.82% | 0.0417487  |
| GO:0005737~cytoplasm                            | 42    | 27.63% | 0.11320826 |
| GO:0044464~cell part                            | 105   | 69.08% | 0.23012183 |
| GO:0005623~cell                                 | 105   | 69.08% | 0.23111091 |
| GO:0044444~cytoplasmic part                     | 27    | 17.76% | 0.54126325 |

Median: 0.06545635625828403

Geo: 0.04962889637919206

| Term                                                 | Count | %     | PValue     |
|------------------------------------------------------|-------|-------|------------|
| GO:0050790~regulation of catalytic activity          | 10    | 6.58% | 0.0077088  |
| GO:0032147~activation of protein kinase activity     | 4     | 2.63% | 0.0132609  |
| GO:0065009~regulation of a molecular function        | 10    | 6.58% | 0.01587624 |
| GO:0045859~regulation of protein kinase activity     | 6     | 3.95% | 0.02954193 |
| GO:0043549~regulation of kinase activity             | 6     | 3.95% | 0.03284997 |
| GO:0051338~regulation of transferase activity        | 6     | 3.95% | 0.0369918  |
| GO:0007243~protein kinase cascade                    | 8     | 5.26% | 0.0386475  |
| GO:0043085~positive regulation of catalytic activity | 6     | 3.95% | 0.04834246 |
| GO:0006469~negative regulation of protein kinase a   | 3     | 1.97% | 0.08257025 |
| GO:0033673~negative regulation of kinase activity    | 3     | 1.97% | 0.08257025 |
| GO:0051348~negative regulation of transferase acti   | 3     | 1.97% | 0.08758647 |
| GO:0045860~positive regulation of protein kinase ac  | 4     | 2.63% | 0.0941953  |
| GO:0033674~positive regulation of kinase activity    | 4     | 2.63% | 0.10092596 |
| GO:0051347~positive regulation of transferase activ  | 4     | 2.63% | 0.10960265 |

|                                                      |   |       |            |
|------------------------------------------------------|---|-------|------------|
| GO:0051336~regulation of hydrolase activity          | 4 | 2.63% | 0.12777791 |
| GO:0043086~negative regulation of catalytic activity | 3 | 1.97% | 0.15650345 |

|                                                     |                          |        |            |
|-----------------------------------------------------|--------------------------|--------|------------|
| Median: 0.14206229159700978                         | Geo: 0.07125983280189296 |        |            |
| Term                                                | Count                    | %      | PValue     |
| GO:0007242~intracellular signaling cascade          | 22                       | 14.47% | 0.00196264 |
| GO:0007154~cell communication                       | 45                       | 29.61% | 0.08178314 |
| GO:0007165~signal transduction                      | 39                       | 25.66% | 0.20234145 |
| GO:0007166~cell surface receptor linked signal tran | 20                       | 13.16% | 0.79394355 |

|                                                    |                         |        |            |
|----------------------------------------------------|-------------------------|--------|------------|
| Median: 0.10637149401814736                        | Geo: 0.0849474832216158 |        |            |
| Term                                               | Count                   | %      | PValue     |
| GO:0000902~cell morphogenesis                      | 10                      | 6.58%  | 0.01669842 |
| GO:0032989~cellular structure morphogenesis        | 10                      | 6.58%  | 0.01669842 |
| GO:0016477~cell migration                          | 7                       | 4.61%  | 0.03362988 |
| GO:0006928~cell motility                           | 8                       | 5.26%  | 0.04555128 |
| GO:0051674~localization of cell                    | 8                       | 5.26%  | 0.04555128 |
| GO:0030030~cell projection organization and bioger | 6                       | 3.95%  | 0.05990029 |
| GO:0048858~cell projection morphogenesis           | 6                       | 3.95%  | 0.05990029 |
| GO:0032990~cell part morphogenesis                 | 6                       | 3.95%  | 0.05990029 |
| GO:0022008~neurogenesis                            | 7                       | 4.61%  | 0.10172001 |
| GO:0030182~neuron differentiation                  | 6                       | 3.95%  | 0.11102298 |
| GO:0016043~cellular component organization and b   | 26                      | 17.11% | 0.11236985 |
| GO:0007409~axonogenesis                            | 4                       | 2.63%  | 0.13916871 |
| GO:0048699~generation of neurons                   | 6                       | 3.95%  | 0.1651285  |
| GO:0048812~neurite morphogenesis                   | 4                       | 2.63%  | 0.1752294  |
| GO:0048667~neuron morphogenesis during differen    | 4                       | 2.63%  | 0.1752294  |
| GO:0000904~cellular morphogenesis during differen  | 4                       | 2.63%  | 0.21139848 |
| GO:0031175~neurite development                     | 4                       | 2.63%  | 0.23117678 |
| GO:0048666~neuron development                      | 4                       | 2.63%  | 0.28990286 |

|                                           |                         |       |            |
|-------------------------------------------|-------------------------|-------|------------|
| Median: 0.09104503852992898               | Geo: 0.0908244416758216 |       |            |
| Term                                      | Count                   | %     | PValue     |
| GO:0046649~lymphocyte activation          | 5                       | 3.29% | 0.03889336 |
| GO:0042110~T cell activation              | 4                       | 2.63% | 0.05815535 |
| GO:0045321~leukocyte activation           | 5                       | 3.29% | 0.08376054 |
| GO:0002376~immune system process          | 11                      | 7.24% | 0.0842084  |
| GO:0046651~lymphocyte proliferation       | 3                       | 1.97% | 0.09788168 |
| GO:0032943~mononuclear cell proliferation | 3                       | 1.97% | 0.09788168 |
| GO:0001775~cell activation                | 5                       | 3.29% | 0.1162637  |
| GO:0006955~immune response                | 7                       | 4.61% | 0.26056428 |

|                                                      |                         |       |            |
|------------------------------------------------------|-------------------------|-------|------------|
| Median: 0.10263827467169256                          | Geo: 0.1099454504314445 |       |            |
| Term                                                 | Count                   | %     | PValue     |
| protein phosphatase                                  | 4                       | 2.63% | 0.01933435 |
| domain:Tyrosine-protein phosphatase                  | 3                       | 1.97% | 0.03341908 |
| active site:Phosphocysteine intermediate             | 3                       | 1.97% | 0.04191161 |
| GO:0006470~protein amino acid dephosphorylation      | 4                       | 2.63% | 0.08289082 |
| IPR000387:Protein-tyrosine phosphatase, Tyr-specific | 3                       | 1.97% | 0.08945855 |

|                                                    |    |        |            |
|----------------------------------------------------|----|--------|------------|
| GO:0042578~phosphoric ester hydrolase activity     | 6  | 3.95%  | 0.09679904 |
| GO:0016311~dephosphorylation                       | 4  | 2.63%  | 0.10263827 |
| GO:0016788~hydrolase activity, acting on ester bon | 9  | 5.92%  | 0.10830484 |
| GO:0004721~phosphoprotein phosphatase activity     | 4  | 2.63%  | 0.11146389 |
| GO:0004725~protein tyrosine phosphatase activity   | 3  | 1.97%  | 0.12631583 |
| GO:0016791~phosphoric monoester hydrolase activi   | 4  | 2.63%  | 0.28627894 |
| GO:0016787~hydrolase activity                      | 18 | 11.84% | 0.49881661 |
| hydrolase                                          | 7  | 4.61%  | 0.78952711 |

Median: 0.07802447275373386

Geo: 0.11298829618483724

| Term                                               | Count | %      | PValue     |
|----------------------------------------------------|-------|--------|------------|
| GO:0048168~regulation of neuronal synaptic plastic | 3     | 1.97%  | 0.03105792 |
| GO:0007268~synaptic transmission                   | 8     | 5.26%  | 0.04555128 |
| GO:0007267~cell-cell signaling                     | 11    | 7.24%  | 0.06121429 |
| GO:0048167~regulation of synaptic plasticity       | 3     | 1.97%  | 0.07522256 |
| GO:0019226~transmission of nerve impulse           | 8     | 5.26%  | 0.08082638 |
| GO:0050803~regulation of synapse structure and ac  | 3     | 1.97%  | 0.08758647 |
| GO:0003008~system process                          | 18    | 11.84% | 0.71987716 |
| GO:0050877~neurological system process             | 15    | 9.87%  | 0.80010184 |

Median: 0.07946974656261849

Geo: 0.12741174769041366

| Term                                              | Count | %     | PValue     |
|---------------------------------------------------|-------|-------|------------|
| GO:0007049~cell cycle                             | 9     | 5.92% | 0.06925923 |
| cell cycle                                        | 5     | 3.29% | 0.07650756 |
| GO:0000074~regulation of progression through cell | 6     | 3.95% | 0.07661957 |
| GO:0051726~regulation of cell cycle               | 6     | 3.95% | 0.07946975 |
| GO:0022402~cell cycle process                     | 8     | 5.26% | 0.08008684 |
| GO:0000278~mitotic cell cycle                     | 4     | 2.63% | 0.32204552 |
| GO:0022403~cell cycle phase                       | 3     | 1.97% | 0.65503475 |

Median: 0.12910236754218637

Geo: 0.1315662955643494

| Term                                 | Count | %     | PValue     |
|--------------------------------------|-------|-------|------------|
| GO:0004620~phospholipase activity    | 3     | 1.97% | 0.09416653 |
| GO:0016298~lipase activity           | 3     | 1.97% | 0.12910237 |
| GO:0004091~carboxylesterase activity | 3     | 1.97% | 0.18732821 |

Median: 0.23450793810192835

Geo: 0.1421944033974187

| Term                                             | Count | %     | PValue     |
|--------------------------------------------------|-------|-------|------------|
| GO:0042981~regulation of apoptosis               | 10    | 6.58% | 0.03207116 |
| GO:0043067~regulation of programmed cell death   | 10    | 6.58% | 0.03482955 |
| GO:0006917~induction of apoptosis                | 4     | 2.63% | 0.23339623 |
| GO:0012502~induction of programmed cell death    | 4     | 2.63% | 0.23561965 |
| GO:0043065~positive regulation of apoptosis      | 4     | 2.63% | 0.36341037 |
| GO:0043068~positive regulation of programmed cel | 4     | 2.63% | 0.37027961 |

Median: 0.21298981099252623

Geo: 0.14655099926417334

| Term                                               | Count | %      | PValue     |
|----------------------------------------------------|-------|--------|------------|
| GO:0043687~post-translational protein modification | 17    | 11.18% | 0.03447465 |
| GO:0043412~biopolymer modification                 | 19    | 12.50% | 0.05642001 |

|                                                  |    |        |            |
|--------------------------------------------------|----|--------|------------|
| GO:0006464~protein modification process          | 18 | 11.84% | 0.07583392 |
| GO:0043170~macromolecule metabolic process       | 54 | 35.53% | 0.07963106 |
| GO:0006793~phosphorus metabolic process          | 11 | 7.24%  | 0.21298981 |
| GO:0006796~phosphate metabolic process           | 11 | 7.24%  | 0.21298981 |
| GO:0044260~cellular macromolecule metabolic proc | 28 | 18.42% | 0.36408905 |
| GO:0019538~protein metabolic process             | 29 | 19.08% | 0.38759877 |
| GO:0044267~cellular protein metabolic process    | 27 | 17.76% | 0.41467928 |

Median: 0.14499032954436994

Geo: 0.15202648386524137

| Term                                 | Count | %     | PValue     |
|--------------------------------------|-------|-------|------------|
| GO:0040007~growth                    | 6     | 3.95% | 0.09774778 |
| GO:0016049~cell growth               | 4     | 2.63% | 0.13343014 |
| GO:0008361~regulation of cell size   | 4     | 2.63% | 0.14499033 |
| GO:0040008~regulation of growth      | 4     | 2.63% | 0.16699377 |
| GO:0001558~regulation of cell growth | 3     | 1.97% | 0.25715566 |

Median: 0.28092879778048224

Geo: 0.15998774749004374

| Term                                              | Count | %     | PValue     |
|---------------------------------------------------|-------|-------|------------|
| GO:0035295~tube development                       | 6     | 3.95% | 0.0176862  |
| GO:0045934~negative regulation of nucleobase, nuc | 5     | 3.29% | 0.17765547 |
| GO:0031324~negative regulation of cellular metabo | 5     | 3.29% | 0.2809288  |
| GO:0016481~negative regulation of transcription   | 4     | 2.63% | 0.33814868 |
| GO:0009892~negative regulation of metabolic proce | 5     | 3.29% | 0.35116929 |

Median: 0.21679396770072448

Geo: 0.17254682489492937

| Term                                                   | Count | %     | PValue     |
|--------------------------------------------------------|-------|-------|------------|
| GO:0007631~feeding behavior                            | 4     | 2.63% | 0.0132609  |
| GO:0019932~second-messenger-mediated signaling         | 7     | 4.61% | 0.0298774  |
| GO:0006873~cellular ion homeostasis                    | 5     | 3.29% | 0.14107926 |
| GO:0055082~cellular chemical homeostasis               | 5     | 3.29% | 0.14107926 |
| GO:0007204~elevation of cytosolic calcium ion conc     | 3     | 1.97% | 0.14485459 |
| GO:0051480~cytosolic calcium ion homeostasis           | 3     | 1.97% | 0.15357415 |
| GO:0050801~ion homeostasis                             | 5     | 3.29% | 0.17931515 |
| GO:0030005~cellular di-, tri-valent inorganic cation I | 4     | 2.63% | 0.18779203 |
| GO:0055066~di-, tri-valent inorganic cation homeost    | 4     | 2.63% | 0.18779203 |
| GO:0048878~chemical homeostasis                        | 5     | 3.29% | 0.24579591 |
| GO:0030003~cellular cation homeostasis                 | 4     | 2.63% | 0.24679262 |
| GO:0055080~cation homeostasis                          | 4     | 2.63% | 0.24679262 |
| GO:0019725~cellular homeostasis                        | 5     | 3.29% | 0.2753221  |
| GO:0042592~homeostatic process                         | 6     | 3.95% | 0.3060075  |
| GO:0006874~cellular calcium ion homeostasis            | 3     | 1.97% | 0.31923838 |
| GO:0055074~calcium ion homeostasis                     | 3     | 1.97% | 0.31923838 |
| GO:0006875~cellular metal ion homeostasis              | 3     | 1.97% | 0.3590126  |
| GO:0055065~metal ion homeostasis                       | 3     | 1.97% | 0.3590126  |

Median: 0.21687007947550468

Geo: 0.18081047887105914

| Term                             | Count | %     | PValue     |
|----------------------------------|-------|-------|------------|
| GO:0002376~immune system process | 11    | 7.24% | 0.0842084  |
| GO:0030097~hemopoiesis           | 4     | 2.63% | 0.19629554 |

|                                                 |   |       |            |
|-------------------------------------------------|---|-------|------------|
| GO:0002521~leukocyte differentiation            | 3 | 1.97% | 0.21687008 |
| GO:0048534~hemopoietic or lymphoid organ develo | 4 | 2.63% | 0.22454334 |
| GO:0002520~immune system development            | 4 | 2.63% | 0.24007799 |

Median: 0.1515089135837126

Geo: 0.18575887357629942

| Term                                        | Count | %     | PValue     |
|---------------------------------------------|-------|-------|------------|
| GO:0006665~sphingolipid metabolic process   | 3     | 1.97% | 0.0612205  |
| GO:0006643~membrane lipid metabolic process | 4     | 2.63% | 0.13724646 |
| GO:0044255~cellular lipid metabolic process | 8     | 5.26% | 0.15150891 |
| GO:0006629~lipid metabolic process          | 8     | 5.26% | 0.28070626 |
| GO:0008610~lipid biosynthetic process       | 3     | 1.97% | 0.61895567 |

Median: 0.31306330276550215

Geo: 0.20213993292493965

| Term                            | Count | %     | PValue     |
|---------------------------------|-------|-------|------------|
| GO:0009888~tissue development   | 8     | 5.26% | 0.03004377 |
| GO:0001501~skeletal development | 5     | 3.29% | 0.14566491 |
| GO:0001503~ossification         | 3     | 1.97% | 0.3130633  |
| GO:0031214~biomineral formation | 3     | 1.97% | 0.3130633  |
| GO:0046849~bone remodeling      | 3     | 1.97% | 0.38009492 |
| GO:0048771~tissue remodeling    | 3     | 1.97% | 0.41845332 |

Median: 0.22612678300387035

Geo: 0.20522610538248465

| Term                           | Count | %     | PValue     |
|--------------------------------|-------|-------|------------|
| GO:0007626~locomotory behavior | 4     | 2.63% | 0.16904168 |
| GO:0006935~chemotaxis          | 3     | 1.97% | 0.22612678 |
| GO:0042330~taxis               | 3     | 1.97% | 0.22612678 |

Median: 0.18718910532733748

Geo: 0.2140013630480883

| Term                                 | Count | %      | PValue     |
|--------------------------------------|-------|--------|------------|
| disulfide bond                       | 18    | 11.84% | 0.09644361 |
| GO:0005576~extracellular region      | 24    | 15.79% | 0.10978214 |
| GO:0044421~extracellular region part | 21    | 13.82% | 0.1520038  |
| GO:0005615~extracellular space       | 20    | 13.16% | 0.15518646 |
| signal                               | 18    | 11.84% | 0.21919175 |
| glycoprotein                         | 20    | 13.16% | 0.36803111 |
| Secreted                             | 9     | 5.92%  | 0.43196977 |
| signal peptide                       | 16    | 10.53% | 0.50542507 |

Median: 0.28744567816976296

Geo: 0.24435719127448727

| Term                                                | Count | %     | PValue     |
|-----------------------------------------------------|-------|-------|------------|
| IPR007087:Zinc finger, C2H2-type                    | 5     | 3.29% | 0.10183541 |
| IPR013087:Zinc finger, C2H2-type/integrase, DNA-bir | 3     | 1.97% | 0.22072902 |
| IPR015880:Zinc finger, C2H2-like                    | 3     | 1.97% | 0.35416233 |
| SM00355:ZnF_C2H2                                    | 3     | 1.97% | 0.44785751 |

Median: 0.35873012641214763

Geo: 0.2739158732596765

| Term                                        | Count | %     | PValue     |
|---------------------------------------------|-------|-------|------------|
| GO:0004857~enzyme inhibitor activity        | 5     | 3.29% | 0.1570748  |
| GO:0004866~endopeptidase inhibitor activity | 3     | 1.97% | 0.35873013 |



|                                                        |                          |        |            |
|--------------------------------------------------------|--------------------------|--------|------------|
| GO:0030414~protease inhibitor activity                 | 3                        | 1.97%  | 0.36473484 |
| Median: 0.25732520791296887                            | Geo: 0.3070428593235986  |        |            |
| Term                                                   | Count                    | %      | PValue     |
| GO:0006397~mRNA processing                             | 4                        | 2.63%  | 0.13533357 |
| GO:0005681~spliceosome                                 | 3                        | 1.97%  | 0.14319607 |
| GO:0016071~mRNA metabolic process                      | 4                        | 2.63%  | 0.19416055 |
| GO:0006396~RNA processing                              | 5                        | 3.29%  | 0.21707126 |
| GO:0008380~RNA splicing                                | 3                        | 1.97%  | 0.29757916 |
| GO:0044428~nuclear part                                | 7                        | 4.61%  | 0.61839088 |
| GO:0030529~ribonucleoprotein complex                   | 5                        | 3.29%  | 0.6720952  |
| GO:0003723~RNA binding                                 | 4                        | 2.63%  | 0.78198005 |
| Median: 0.3776840545803085                             | Geo: 0.35546088644285123 |        |            |
| Term                                                   | Count                    | %      | PValue     |
| Postsynaptic cell membrane                             | 3                        | 1.97%  | 0.24967477 |
| cell junction                                          | 4                        | 2.63%  | 0.37768405 |
| synapse                                                | 3                        | 1.97%  | 0.47629076 |
| Median: 0.4350696695030194                             | Geo: 0.3726779361542909  |        |            |
| Term                                                   | Count                    | %      | PValue     |
| lipoprotein                                            | 6                        | 3.95%  | 0.25929439 |
| Palmitate                                              | 3                        | 1.97%  | 0.43506967 |
| lipid moiety-binding region:S-palmitoyl cysteine       | 3                        | 1.97%  | 0.45882716 |
| Median: 0.6550347493280828                             | Geo: 0.3930222011751995  |        |            |
| Term                                                   | Count                    | %      | PValue     |
| GO:0051704~multi-organism process                      | 5                        | 3.29%  | 0.11907542 |
| GO:0022414~reproductive process                        | 3                        | 1.97%  | 0.65503475 |
| GO:0000003~reproduction                                | 4                        | 2.63%  | 0.77833184 |
| Median: 0.5887866746955883                             | Geo: 0.40006057508686044 |        |            |
| Term                                                   | Count                    | %      | PValue     |
| GO:0000287~magnesium ion binding                       | 8                        | 5.26%  | 0.00212904 |
| GO:0016301~kinase activity                             | 12                       | 7.89%  | 0.09401846 |
| magnesium                                              | 5                        | 3.29%  | 0.11028258 |
| GO:0016772~transferase activity, transferring phosphat | 12                       | 7.89%  | 0.20462216 |
| GO:0006793~phosphorus metabolic process                | 11                       | 7.24%  | 0.21298981 |
| GO:0006796~phosphate metabolic process                 | 11                       | 7.24%  | 0.21298981 |
| kinase                                                 | 7                        | 4.61%  | 0.24441827 |
| GO:0016773~phosphotransferase activity, alcohol gl     | 9                        | 5.92%  | 0.27451616 |
| SM00220:S_TKc                                          | 6                        | 3.95%  | 0.28396519 |
| GO:0016740~transferase activity                        | 17                       | 11.18% | 0.2851711  |
| IPR002290:Serine/threonine protein kinase              | 3                        | 1.97%  | 0.40439199 |
| GO:0004672~protein kinase activity                     | 7                        | 4.61%  | 0.44285187 |
| binding site:ATP                                       | 4                        | 2.63%  | 0.45273372 |
| IPR000719:Protein kinase, core                         | 4                        | 2.63%  | 0.5317224  |
| IPR008271:Serine/threonine protein kinase, active site | 3                        | 1.97%  | 0.55142859 |
| Serine/threonine-protein kinase                        | 3                        | 1.97%  | 0.57400518 |

|                                                     |    |       |            |
|-----------------------------------------------------|----|-------|------------|
| GO:0016310~phosphorylation                          | 7  | 4.61% | 0.60356817 |
| GO:0004674~protein serine/threonine kinase activity | 5  | 3.29% | 0.61344031 |
| GO:0006468~protein amino acid phosphorylation       | 6  | 3.95% | 0.62083328 |
| active site:Proton acceptor                         | 4  | 2.63% | 0.66904821 |
| domain:Protein kinase                               | 3  | 1.97% | 0.68221601 |
| nucleotide phosphate-binding region:ATP             | 4  | 2.63% | 0.68868595 |
| nucleotide-binding                                  | 8  | 5.26% | 0.69231599 |
| atp-binding                                         | 6  | 3.95% | 0.71410301 |
| GO:0005524~ATP binding                              | 9  | 5.92% | 0.82230441 |
| GO:0032559~adenyl ribonucleotide binding            | 9  | 5.92% | 0.83617534 |
| GO:0000166~nucleotide binding                       | 13 | 8.55% | 0.84942789 |
| transferase                                         | 6  | 3.95% | 0.87435008 |
| GO:0030554~adenyl nucleotide binding                | 9  | 5.92% | 0.87489505 |
| GO:0032555~purine ribonucleotide binding            | 10 | 6.58% | 0.90630926 |
| GO:0032553~ribonucleotide binding                   | 10 | 6.58% | 0.90630926 |
| GO:0017076~purine nucleotide binding                | 10 | 6.58% | 0.93066493 |

Median: 0.38568296458186957

Geo: 0.4004411400930015

| Term                     | Count | %     | PValue     |
|--------------------------|-------|-------|------------|
| GO:0005764~lysosome      | 3     | 1.97% | 0.38252226 |
| GO:0000323~lytic vacuole | 3     | 1.97% | 0.38568296 |
| GO:0005773~vacuole       | 3     | 1.97% | 0.43524009 |

Median: 0.6351311617719959

Geo: 0.4636426277900228

| Term                                                | Count | %      | PValue     |
|-----------------------------------------------------|-------|--------|------------|
| transducer                                          | 10    | 6.58%  | 0.02538471 |
| g-protein coupled receptor                          | 8     | 5.26%  | 0.09168277 |
| GO:0001653~peptide receptor activity                | 4     | 2.63%  | 0.09275957 |
| GO:0042277~peptide binding                          | 5     | 3.29%  | 0.09441662 |
| rno04080:Neuroactive ligand-receptor interaction    | 5     | 3.29%  | 0.23679494 |
| membrane                                            | 30    | 19.74% | 0.2394147  |
| IPR000276:Rhodopsin-like GPCR superfamily           | 7     | 4.61%  | 0.24170315 |
| G protein-coupled receptor                          | 3     | 1.97%  | 0.24587694 |
| GO:0005886~plasma membrane                          | 20    | 13.16% | 0.25253032 |
| glycoprotein                                        | 20    | 13.16% | 0.36803111 |
| receptor                                            | 12    | 7.89%  | 0.40674756 |
| GO:0044459~plasma membrane part                     | 14    | 9.21%  | 0.54022955 |
| GO:0005887~integral to plasma membrane              | 9     | 5.92%  | 0.56466453 |
| GO:0031226~intrinsic to plasma membrane             | 9     | 5.92%  | 0.58241564 |
| glycosylation site:N-linked (GlcNAc...)             | 17    | 11.18% | 0.61271877 |
| transmembrane                                       | 21    | 13.82% | 0.6131457  |
| transmembrane protein                               | 5     | 3.29%  | 0.65711662 |
| topological domain:Extracellular                    | 11    | 7.24%  | 0.6586014  |
| topological domain:Cytoplasmic                      | 13    | 8.55%  | 0.72610211 |
| GO:0007186~G-protein coupled receptor protein sig   | 16    | 10.53% | 0.74139492 |
| GO:0007166~cell surface receptor linked signal tran | 20    | 13.16% | 0.79394355 |
| transmembrane region                                | 15    | 9.87%  | 0.8266659  |
| GO:0004871~signal transducer activity               | 20    | 13.16% | 0.92876504 |
| GO:0060089~molecular transducer activity            | 20    | 13.16% | 0.92876504 |

|                                                |    |        |            |
|------------------------------------------------|----|--------|------------|
| GO:0004930~G-protein coupled receptor activity | 11 | 7.24%  | 0.96003914 |
| GO:0001584~rhodopsin-like receptor activity    | 9  | 5.92%  | 0.9810981  |
| GO:0004888~transmembrane receptor activity     | 12 | 7.89%  | 0.9839537  |
| GO:0004872~receptor activity                   | 15 | 9.87%  | 0.98458069 |
| GO:0016020~membrane                            | 41 | 26.97% | 0.9982432  |
| GO:0044425~membrane part                       | 31 | 20.39% | 0.99928109 |
| GO:0016021~integral to membrane                | 26 | 17.11% | 0.99967323 |
| GO:0031224~intrinsic to membrane               | 26 | 17.11% | 0.99970986 |

Median: 0.4708182436304623

Geo: 0.4660174692927841

| Term                                          | Count | %     | PValue     |
|-----------------------------------------------|-------|-------|------------|
| GO:0030135~coated vesicle                     | 3     | 1.97% | 0.38252226 |
| GO:0016023~cytoplasmic membrane-bound vesicle | 4     | 2.63% | 0.45233669 |
| GO:0031988~membrane-bound vesicle             | 4     | 2.63% | 0.47081824 |
| GO:0031410~cytoplasmic vesicle                | 4     | 2.63% | 0.49801369 |
| GO:0031982~vesicle                            | 4     | 2.63% | 0.54174871 |

Median: 0.5977868973943758

Geo: 0.5188412456329615

| Term                                    | Count | %      | PValue     |
|-----------------------------------------|-------|--------|------------|
| GO:0006396~RNA processing               | 5     | 3.29%  | 0.21707126 |
| GO:0043233~organelle lumen              | 8     | 5.26%  | 0.25090659 |
| GO:0031974~membrane-enclosed lumen      | 8     | 5.26%  | 0.25090659 |
| rna-binding                             | 3     | 1.97%  | 0.45932768 |
| GO:0031981~nuclear lumen                | 5     | 3.29%  | 0.54864712 |
| GO:0005654~nucleoplasm                  | 4     | 2.63%  | 0.57718292 |
| GO:0044428~nuclear part                 | 7     | 4.61%  | 0.61839088 |
| GO:0030529~ribonucleoprotein complex    | 5     | 3.29%  | 0.6720952  |
| GO:0044451~nucleoplasm part             | 3     | 1.97%  | 0.72030841 |
| GO:0044446~intracellular organelle part | 17    | 11.18% | 0.83082855 |
| GO:0044422~organelle part               | 17    | 11.18% | 0.83519455 |
| GO:0032991~macromolecular complex       | 15    | 9.87%  | 0.92160933 |

Median: 0.5316807174174902

Geo: 0.5256863931597372

| Term                             | Count | %     | PValue     |
|----------------------------------|-------|-------|------------|
| GO:0006954~inflammatory response | 4     | 2.63% | 0.47305709 |
| GO:0006950~response to stress    | 10    | 6.58% | 0.50424836 |
| GO:0006952~defense response      | 5     | 3.29% | 0.55911307 |
| GO:0009611~response to wounding  | 5     | 3.29% | 0.57259724 |

Median: 0.6050691824575416

Geo: 0.5538417602513612

| Term                          | Count | %     | PValue     |
|-------------------------------|-------|-------|------------|
| GO:0005739~mitochondrion      | 9     | 5.92% | 0.38018834 |
| GO:0044429~mitochondrial part | 4     | 2.63% | 0.60506918 |
| Mitochondrion                 | 4     | 2.63% | 0.7385047  |

Median: 0.6203505593051134

Geo: 0.5574080784731396

| Term                                          | Count | %     | PValue     |
|-----------------------------------------------|-------|-------|------------|
| GO:0005578~proteinaceous extracellular matrix | 4     | 2.63% | 0.34465906 |
| GO:0031012~extracellular matrix               | 4     | 2.63% | 0.36653473 |

|                                |   |       |            |
|--------------------------------|---|-------|------------|
| GO:0022610~biological adhesion | 4 | 2.63% | 0.87416638 |
| GO:0007155~cell adhesion       | 4 | 2.63% | 0.87416638 |

Median: 0.6077307778369707

Geo: 0.6401225395288845

| Term                                              | Count | %      | PValue     |
|---------------------------------------------------|-------|--------|------------|
| GO:0051179~localization                           | 25    | 16.45% | 0.45835904 |
| GO:0046907~intracellular transport                | 7     | 4.61%  | 0.47664479 |
| GO:0033036~macromolecule localization             | 7     | 4.61%  | 0.50456307 |
| GO:0006605~protein targeting                      | 3     | 1.97%  | 0.55097123 |
| GO:0051649~establishment of cellular localization | 8     | 5.26%  | 0.56384228 |
| GO:0051641~cellular localization                  | 8     | 5.26%  | 0.57663052 |
| GO:0008104~protein localization                   | 6     | 3.95%  | 0.63883103 |
| GO:0006886~intracellular protein transport        | 4     | 2.63%  | 0.64815115 |
| GO:0045184~establishment of protein localization  | 5     | 3.29%  | 0.7541813  |
| GO:0015031~protein transport                      | 4     | 2.63%  | 0.85437133 |
| GO:0051234~establishment of localization          | 16    | 10.53% | 0.92870858 |
| GO:0006810~transport                              | 14    | 9.21%  | 0.96737074 |

Median: 0.7180410061501701

Geo: 0.6532110505514424

| Term                               | Count | %     | PValue     |
|------------------------------------|-------|-------|------------|
| GO:0005506~iron ion binding        | 4     | 2.63% | 0.40215727 |
| iron                               | 3     | 1.97% | 0.58274416 |
| GO:0016491~oxidoreductase activity | 6     | 3.95% | 0.85333785 |
| oxidoreductase                     | 3     | 1.97% | 0.9103727  |

Median: 0.7898650649158409

Geo: 0.8021733696316998

| Term                              | Count | %     | PValue     |
|-----------------------------------|-------|-------|------------|
| GO:0006508~proteolysis            | 6     | 3.95% | 0.73437339 |
| GO:0008233~peptidase activity     | 5     | 3.29% | 0.78986506 |
| GO:0004175~endopeptidase activity | 3     | 1.97% | 0.88988704 |

Median: 0.970335217397613

Geo: 0.9247462277976668

| Term                                            | Count | %     | PValue     |
|-------------------------------------------------|-------|-------|------------|
| GO:0008092~cytoskeletal protein binding         | 3     | 1.97% | 0.79393513 |
| GO:0005856~cytoskeleton                         | 4     | 2.63% | 0.9623272  |
| GO:0043228~non-membrane-bound organelle         | 8     | 5.26% | 0.97834324 |
| GO:0043232~intracellular non-membrane-bound org | 8     | 5.26% | 0.97834324 |

Median: 0.9839158915997125

Geo: 0.9253029306672969

| Term                                               | Count | %     | PValue     |
|----------------------------------------------------|-------|-------|------------|
| GO:0015267~channel activity                        | 3     | 1.97% | 0.81163057 |
| GO:0022803~passive transmembrane transporter ac    | 3     | 1.97% | 0.81163057 |
| GO:0022857~transmembrane transporter activity      | 4     | 2.63% | 0.9832207  |
| GO:0005215~transporter activity                    | 6     | 3.95% | 0.98461108 |
| GO:0022892~substrate-specific transporter activity | 4     | 2.63% | 0.99122499 |
| GO:0022891~substrate-specific transmembrane trar   | 3     | 1.97% | 0.9928848  |

Median: 0.9998834069831795

Geo: 0.9976789972437883

| Term | Count | % | PValue |
|------|-------|---|--------|
|------|-------|---|--------|

|                                                   |   |       |            |
|---------------------------------------------------|---|-------|------------|
| GO:0007600~sensory perception                     | 7 | 4.61% | 0.99325095 |
| GO:0007608~sensory perception of smell            | 3 | 1.97% | 0.99988341 |
| GO:0007606~sensory perception of chemical stimuli | 3 | 1.97% | 0.99991743 |

Table S6

Median: 7.044309624431602E-9

Geo: 1.1045055549475803E-8

| Term                                      | Count | %      | PValue   |
|-------------------------------------------|-------|--------|----------|
| GO:0005622~intracellular                  | 501   | 44.81% | 1.21E-19 |
| GO:0044424~intracellular part             | 453   | 40.52% | 3.90E-14 |
| GO:0005737~cytoplasm                      | 291   | 26.03% | 8.02E-10 |
| GO:0043227~membrane-bound organelle       | 333   | 29.79% | 1.05E-09 |
| GO:0043231~intracellular membrane-bound c | 332   | 29.70% | 1.48E-09 |
| GO:0043226~organelle                      | 377   | 33.72% | 7.04E-09 |
| GO:0043229~intracellular organelle        | 376   | 33.63% | 8.62E-09 |
| GO:0044444~cytoplasmic part               | 215   | 19.23% | 2.79E-06 |
| GO:0005634~nucleus                        | 184   | 16.46% | 0.005189 |
| GO:0005623~cell                           | 652   | 58.32% | 0.006045 |
| GO:0044464~cell part                      | 651   | 58.23% | 0.009543 |

Median: 3.542056092261983E-5

Geo: 3.775890795601803E-5

| Term                                         | Count | %      | PValue   |
|----------------------------------------------|-------|--------|----------|
| GO:0016192~vesicle-mediated transport        | 55    | 4.92%  | 1.25E-07 |
| GO:0015031~protein transport                 | 64    | 5.72%  | 1.64E-07 |
| GO:0045184~establishment of protein localiz  | 67    | 5.99%  | 2.77E-07 |
| GO:0008104~protein localization              | 69    | 6.17%  | 7.17E-07 |
| GO:0033036~macromolecule localization        | 70    | 6.26%  | 1.71E-06 |
| GO:0006886~intracellular protein transport   | 47    | 4.20%  | 3.20E-06 |
| GO:0016043~cellular component organizator    | 181   | 16.19% | 6.81E-06 |
| GO:0046907~intracellular transport           | 64    | 5.72%  | 3.54E-05 |
| GO:0051649~establishment of cellular localiz | 74    | 6.62%  | 2.04E-04 |
| GO:0051641~cellular localization             | 74    | 6.62%  | 2.87E-04 |
| GO:0006810~transport                         | 169   | 15.12% | 5.43E-04 |
| GO:0051234~establishment of localization     | 174   | 15.56% | 6.17E-04 |
| GO:0051179~localization                      | 194   | 17.35% | 8.66E-04 |
| GO:0032940~secretion by cell                 | 26    | 2.33%  | 0.044288 |
| GO:0005215~transporter activity              | 81    | 7.25%  | 0.112579 |

Median: 0.0011776838916593433

Geo: 6.354060560924282E-4

| Term                                    | Count | %      | PValue   |
|-----------------------------------------|-------|--------|----------|
| GO:0031090~organelle membrane           | 61    | 5.46%  | 1.14E-04 |
| GO:0044422~organelle part               | 153   | 13.69% | 0.001178 |
| GO:0044446~intracellular organelle part | 151   | 13.51% | 0.001906 |

Median: 0.00409552834425737

Geo: 0.0011073699870049756

| Term                                         | Count | %     | PValue   |
|----------------------------------------------|-------|-------|----------|
| GO:0016791~phosphoric monoester hydrolas     | 31    | 2.77% | 5.27E-06 |
| GO:0042578~phosphoric ester hydrolase acti   | 35    | 3.13% | 2.72E-05 |
| GO:0016788~hydrolase activity, acting on est | 56    | 5.01% | 4.15E-05 |
| GO:0016311~dephosphorylation                 | 17    | 1.52% | 0.004096 |
| GO:0004721~phosphoprotein phosphatase ac     | 16    | 1.43% | 0.009877 |
| GO:0006470~protein amino acid dephosphory    | 14    | 1.25% | 0.022158 |
| GO:0004725~protein tyrosine phosphatase ac   | 6     | 0.54% | 0.383037 |

| Median: 0.003228915351500921                        | Geo: 0.0014419553823479551 |        |          |
|-----------------------------------------------------|----------------------------|--------|----------|
| Term                                                | Count                      | %      | PValue   |
| GO:0044238~primary metabolic process                | 417                        | 37.30% | 1.56E-05 |
| GO:0008152~metabolic process                        | 458                        | 40.97% | 2.05E-05 |
| GO:0044237~cellular metabolic process               | 411                        | 36.76% | 4.95E-05 |
| GO:0019538~protein metabolic process                | 218                        | 19.50% | 6.51E-04 |
| GO:0043170~macromolecule metabolic process          | 348                        | 31.13% | 0.002058 |
| GO:0009987~cellular process                         | 658                        | 58.86% | 0.002091 |
| GO:0044267~cellular protein metabolic process       | 199                        | 17.80% | 0.004366 |
| GO:0044260~cellular macromolecule metabolic process | 202                        | 18.07% | 0.004398 |
| GO:0043412~biopolymer modification                  | 104                        | 9.30%  | 0.010652 |
| GO:0006464~protein modification process             | 101                        | 9.03%  | 0.011152 |
| GO:0043283~biopolymer metabolic process             | 239                        | 21.38% | 0.015262 |
| GO:0043687~post-translational protein modification  | 81                         | 7.25%  | 0.052405 |

| Median: 0.0014458326006580122                                 | Geo: 0.0018374799149451773 |       |          |
|---------------------------------------------------------------|----------------------------|-------|----------|
| Term                                                          | Count                      | %     | PValue   |
| GO:0004437~inositol or phosphatidylinositol 4-kinase activity | 9                          | 0.81% | 2.56E-04 |
| GO:0042577~lipid phosphatase activity                         | 5                          | 0.45% | 0.001446 |
| GO:0004439~phosphoinositide 5-phosphatase activity            | 3                          | 0.27% | 0.016744 |

| Median: 0.023947488057755185          | Geo: 0.0019884476899413527 |       |          |
|---------------------------------------|----------------------------|-------|----------|
| Term                                  | Count                      | %     | PValue   |
| GO:0016192~vesicle-mediated transport | 55                         | 4.92% | 1.25E-07 |
| GO:0048193~Golgi vesicle transport    | 13                         | 1.16% | 0.007169 |
| GO:0045045~secretory pathway          | 24                         | 2.15% | 0.023947 |
| GO:0046903~secretion                  | 33                         | 2.95% | 0.032828 |
| GO:0032940~secretion by cell          | 26                         | 2.33% | 0.044288 |

| Median: 0.0016357492368776236   | Geo: 0.0032548360076113886 |       |          |
|---------------------------------|----------------------------|-------|----------|
| Term                            | Count                      | %     | PValue   |
| GO:0014069~postsynaptic density | 8                          | 0.72% | 5.29E-04 |
| GO:0042734~presynaptic membrane | 7                          | 0.63% | 0.001636 |
| GO:0032279~asymmetric synapse   | 3                          | 0.27% | 0.039821 |

| Median: 0.004086253621505005                    | Geo: 0.003681953265631834 |       |          |
|-------------------------------------------------|---------------------------|-------|----------|
| Term                                            | Count                     | %     | PValue   |
| GO:0006807~nitrogen compound metabolic process  | 44                        | 3.94% | 3.81E-04 |
| GO:0006519~amino acid and derivative metabolism | 38                        | 3.40% | 5.58E-04 |
| GO:0009308~amine metabolic process              | 41                        | 3.67% | 7.89E-04 |
| GO:0006520~amino acid metabolic process         | 27                        | 2.42% | 0.007384 |
| GO:0019752~carboxylic acid metabolic process    | 41                        | 3.67% | 0.044166 |
| GO:0006082~organic acid metabolic process       | 41                        | 3.67% | 0.04559  |

| Median: 0.0024659668666173417                 | Geo: 0.0038986907006064455 |       |          |
|-----------------------------------------------|----------------------------|-------|----------|
| Term                                          | Count                      | %     | PValue   |
| GO:0031988~membrane-bound vesicle             | 32                         | 2.86% | 2.95E-04 |
| GO:0016023~cytoplasmic membrane-bound vesicle | 30                         | 2.68% | 8.53E-04 |

|                                    |    |       |          |
|------------------------------------|----|-------|----------|
| GO:0031982~vesicle                 | 32 | 2.86% | 0.001726 |
| GO:0031410~cytoplasmic vesicle     | 30 | 2.68% | 0.002466 |
| GO:0030135~coated vesicle          | 17 | 1.52% | 0.008603 |
| GO:0030136~clathrin-coated vesicle | 15 | 1.34% | 0.011561 |
| GO:0008021~synaptic vesicle        | 8  | 0.72% | 0.128535 |

|                                           |                           |       |          |
|-------------------------------------------|---------------------------|-------|----------|
| Median: 0.005697269569420361              | Geo: 0.003905295818069365 |       |          |
| Term                                      | Count                     | %     | PValue   |
| GO:0012505~endomembrane system            | 41                        | 3.67% | 4.89E-04 |
| GO:0005789~endoplasmic reticulum membra   | 15                        | 1.34% | 0.004224 |
| GO:0042175~nuclear envelope-endoplasmic r | 15                        | 1.34% | 0.007171 |
| GO:0044432~endoplasmic reticulum part     | 16                        | 1.43% | 0.01569  |

|                                         |                            |       |          |
|-----------------------------------------|----------------------------|-------|----------|
| Median: 0.005800083031536231            | Geo: 0.0045423103766470746 |       |          |
| Term                                    | Count                      | %     | PValue   |
| GO:0065003~macromolecular complex assen | 42                         | 3.76% | 0.00193  |
| GO:0022607~cellular component assembly  | 43                         | 3.85% | 0.0058   |
| GO:0006461~protein complex assembly     | 26                         | 2.33% | 0.008372 |

|                                          |                           |        |          |
|------------------------------------------|---------------------------|--------|----------|
| Median: 0.003102987338819654             | Geo: 0.005413943633266698 |        |          |
| Term                                     | Count                     | %      | PValue   |
| GO:0000166~nucleotide binding            | 139                       | 12.43% | 4.33E-05 |
| GO:0032553~ribonucleotide binding        | 114                       | 10.20% | 6.94E-04 |
| GO:0032555~purine ribonucleotide binding | 114                       | 10.20% | 6.94E-04 |
| GO:0017076~purine nucleotide binding     | 116                       | 10.38% | 0.001642 |
| nucleotide-binding                       | 68                        | 6.08%  | 0.004564 |
| GO:0032559~adenyl ribonucleotide binding | 79                        | 7.07%  | 0.140823 |
| GO:0005524~ATP binding                   | 77                        | 6.89%  | 0.165516 |
| GO:0030554~adenyl nucleotide binding     | 81                        | 7.25%  | 0.202837 |

|                                               |                           |       |          |
|-----------------------------------------------|---------------------------|-------|----------|
| Median: 0.004872413994231359                  | Geo: 0.006380150986284573 |       |          |
| Term                                          | Count                     | %     | PValue   |
| GO:0004437~inositol or phosphatidylinositol p | 9                         | 0.81% | 2.56E-04 |
| SM00128:IPPC                                  | 5                         | 0.45% | 0.002727 |
| GO:0046030~inositol trisphosphate phosphat    | 4                         | 0.36% | 0.004872 |
| GO:0004445~inositol-polyphosphate 5-phosph    | 4                         | 0.36% | 0.004872 |
| IPR000300:Inositol polyphosphate related pho  | 4                         | 0.36% | 0.011463 |
| IPR005135:Endonuclease/exonuclease/phosph     | 4                         | 0.36% | 0.354689 |

|                                             |                          |       |          |
|---------------------------------------------|--------------------------|-------|----------|
| Median: 0.01031240595268623                 | Geo: 0.00687033963953285 |       |          |
| Term                                        | Count                    | %     | PValue   |
| GO:0007049~cell cycle                       | 50                       | 4.47% | 3.48E-04 |
| GO:0007050~cell cycle arrest                | 10                       | 0.89% | 0.002501 |
| GO:0045786~negative regulation of progress  | 15                       | 1.34% | 0.002807 |
| GO:0022402~cell cycle process               | 39                       | 3.49% | 0.008623 |
| GO:0000074~regulation of progression throug | 26                       | 2.33% | 0.012002 |
| GO:0051726~regulation of cell cycle         | 26                       | 2.33% | 0.013531 |
| GO:0000278~mitotic cell cycle               | 23                       | 2.06% | 0.017947 |



|                                                |                           |        |          |
|------------------------------------------------|---------------------------|--------|----------|
| GO:0022403~cell cycle phase                    | 22                        | 1.97%  | 0.080816 |
| Median: 0.0028084324789411762                  | Geo: 0.008228285605659864 |        |          |
| Term                                           | Count                     | %      | PValue   |
| GO:0048519~negative regulation of biological   | 80                        | 7.16%  | 0.00239  |
| GO:0048523~negative regulation of cellular p   | 75                        | 6.71%  | 0.002808 |
| GO:0009892~negative regulation of metaboli     | 28                        | 2.50%  | 0.082998 |
| Median: 0.012960373553618398                   | Geo: 0.008546649490151655 |        |          |
| Term                                           | Count                     | %      | PValue   |
| GO:0006457~protein folding                     | 23                        | 2.06%  | 0.001451 |
| chaperone                                      | 10                        | 0.89%  | 0.011169 |
| GO:0051082~unfolded protein binding            | 12                        | 1.07%  | 0.014752 |
| IPR002423:Chaperonin Cpn60/TCP-1               | 4                         | 0.36%  | 0.022313 |
| Median: 0.9967247590148626                     | Geo: 0.01098528701294567  |        |          |
| Term                                           | Count                     | %      | PValue   |
| GO:0007242~intracellular signaling cascade     | 114                       | 10.20% | 1.33E-06 |
| GO:0007154~cell communication                  | 218                       | 19.50% | 0.996725 |
| GO:0007165~signal transduction                 | 196                       | 17.53% | 0.997839 |
| Median: 0.040660299161142804                   | Geo: 0.012755242088997738 |        |          |
| Term                                           | Count                     | %      | PValue   |
| GO:0016044~membrane organization and bic       | 29                        | 2.59%  | 0.001255 |
| GO:0010324~membrane invagination               | 16                        | 1.43%  | 0.04066  |
| GO:0006897~endocytosis                         | 16                        | 1.43%  | 0.04066  |
| Median: 0.10964998236347706                    | Geo: 0.014021621729689819 |        |          |
| Term                                           | Count                     | %      | PValue   |
| GO:0005525~GTP binding                         | 37                        | 3.31%  | 7.53E-06 |
| GO:0032561~guanyl ribonucleotide binding       | 37                        | 3.31%  | 1.26E-05 |
| GO:0019001~guanyl nucleotide binding           | 37                        | 3.31%  | 1.46E-05 |
| GTP-binding                                    | 26                        | 2.33%  | 2.21E-04 |
| GO:0003924~GTPase activity                     | 21                        | 1.88%  | 4.06E-04 |
| IPR005225:Small GTP-binding protein domain     | 15                        | 1.34%  | 0.007434 |
| IPR001806:Ras GTPase                           | 15                        | 1.34%  | 0.007434 |
| nucleotide phosphate-binding region:GTP        | 14                        | 1.25%  | 0.023175 |
| lipid moiety-binding region:S-geranylgeranyl c | 7                         | 0.63%  | 0.041332 |
| short sequence motif:Effector region           | 7                         | 0.63%  | 0.062708 |
| GO:0017111~nucleoside-triphosphatase activ     | 37                        | 3.31%  | 0.10965  |
| GO:0016462~pyrophosphatase activity            | 38                        | 3.40%  | 0.122742 |
| GO:0016818~hydrolase activity, acting on aci   | 38                        | 3.40%  | 0.12873  |
| GO:0016817~hydrolase activity, acting on aci   | 38                        | 3.40%  | 0.139562 |
| prenylation                                    | 8                         | 0.72%  | 0.152535 |
| IPR013753:Ras                                  | 9                         | 0.81%  | 0.152954 |
| PIRSF037165:ras protein                        | 3                         | 0.27%  | 0.159725 |
| propeptide:Removed in mature form              | 9                         | 0.81%  | 0.175615 |
| Methylation                                    | 10                        | 0.89%  | 0.203346 |

|                                      |   |       |          |
|--------------------------------------|---|-------|----------|
| IPR003577:Ras small GTPase, Ras type | 3 | 0.27% | 0.297638 |
| SM00173:RAS                          | 3 | 0.27% | 0.305554 |

|                                              |                          |       |          |
|----------------------------------------------|--------------------------|-------|----------|
| Median: 0.01276382284052376                  | Geo: 0.01838815303424093 |       |          |
| Term                                         | Count                    | %     | PValue   |
| GO:0004774~succinate-CoA ligase activity     | 3                        | 0.27% | 0.008688 |
| GO:0016405~CoA-ligase activity               | 4                        | 0.36% | 0.010767 |
| GO:0016878~acid-thiol ligase activity        | 4                        | 0.36% | 0.014761 |
| GO:0016877~ligase activity, forming carbon-s | 4                        | 0.36% | 0.082806 |

|                                              |                           |       |          |
|----------------------------------------------|---------------------------|-------|----------|
| Median: 0.017439820365672112                 | Geo: 0.024768054688680787 |       |          |
| Term                                         | Count                     | %     | PValue   |
| IPR000504:RNA recognition motif, RNP-1       | 14                        | 1.25% | 0.012923 |
| rna-binding                                  | 18                        | 1.61% | 0.014434 |
| IPR012677:Nucleotide-binding, alpha-beta pla | 14                        | 1.25% | 0.01744  |
| SM00360:RRM                                  | 16                        | 1.43% | 0.042508 |
| GO:0003723~RNA binding                       | 36                        | 3.22% | 0.067407 |

|                                            |                         |       |          |
|--------------------------------------------|-------------------------|-------|----------|
| Median: 0.035923506232415525               | Geo: 0.0260307834995732 |       |          |
| Term                                       | Count                   | %     | PValue   |
| GO:0044271~nitrogen compound biosynthetic  | 13                      | 1.16% | 0.010719 |
| GO:0009309~amine biosynthetic process      | 10                      | 0.89% | 0.035924 |
| GO:0008652~amino acid biosynthetic process | 7                       | 0.63% | 0.045807 |

|                                 |                          |       |          |
|---------------------------------|--------------------------|-------|----------|
| Median: 0.020676498351106368    | Geo: 0.02792059126257564 |       |          |
| Term                            | Count                    | %     | PValue   |
| GO:0005794~Golgi apparatus      | 31                       | 2.77% | 0.015073 |
| GO:0044431~Golgi apparatus part | 19                       | 1.70% | 0.020676 |
| GO:0000139~Golgi membrane       | 12                       | 1.07% | 0.069837 |

|                                 |                          |       |          |
|---------------------------------|--------------------------|-------|----------|
| Median: 0.04179945450168271     | Geo: 0.02866270308739085 |       |          |
| Term                            | Count                    | %     | PValue   |
| GO:0051020~GTPase binding       | 11                       | 0.98% | 0.005704 |
| GO:0031267~small GTPase binding | 9                        | 0.81% | 0.0147   |
| GO:0017016~Ras GTPase binding   | 7                        | 0.63% | 0.068898 |
| GO:0017048~Rho GTPase binding   | 4                        | 0.36% | 0.116835 |

|                                            |                          |       |          |
|--------------------------------------------|--------------------------|-------|----------|
| Median: 0.05672383173871821                | Geo: 0.03746482697220645 |       |          |
| Term                                       | Count                    | %     | PValue   |
| GO:0007264~small GTPase mediated signal t  | 43                       | 3.85% | 9.56E-06 |
| GO:0005083~small GTPase regulator activity | 20                       | 1.79% | 7.72E-04 |
| GO:0030695~GTPase regulator activity       | 27                       | 2.42% | 0.002797 |
| GO:0005085~guanyl-nucleotide exchange fac  | 15                       | 1.34% | 0.007996 |
| GO:0051056~regulation of small GTPase med  | 17                       | 1.52% | 0.017757 |
| GO:0008047~enzyme activator activity       | 20                       | 1.79% | 0.02122  |
| GO:0005088~Ras guanyl-nucleotide exchange  | 9                        | 0.81% | 0.025163 |
| GO:0007265~Ras protein signal transduction | 17                       | 1.52% | 0.031174 |
| GO:0030234~enzyme regulator activity       | 47                       | 4.20% | 0.038539 |

|                                                           |    |       |          |
|-----------------------------------------------------------|----|-------|----------|
| GO:0046578~regulation of Ras protein signal               | 12 | 1.07% | 0.039714 |
| GO:0007266~Rho protein signal transduction                | 10 | 0.89% | 0.056724 |
| GO:0009966~regulation of signal transduction              | 35 | 3.13% | 0.071205 |
| GO:0005089~Rho guanyl-nucleotide exchange factor activity | 7  | 0.63% | 0.074098 |
| GO:0005096~GTPase activator activity                      | 12 | 1.07% | 0.085486 |
| GO:0035023~regulation of Rho protein signal transduction  | 7  | 0.63% | 0.112689 |
| IPR011993:Pleckstrin homology-type                        | 12 | 1.07% | 0.182677 |
| IPR001849:Pleckstrin-like                                 | 9  | 0.81% | 0.407613 |
| IPR000219:DH                                              | 3  | 0.27% | 0.415812 |
| SM00325:RhoGEF                                            | 3  | 0.27% | 0.425544 |
| SM00233:PH                                                | 9  | 0.81% | 0.488891 |
| domain:PH                                                 | 3  | 0.27% | 0.801822 |

Median: 0.05790452203551337

Geo: 0.03831891115558686

| Term                            | Count | %     | PValue   |
|---------------------------------|-------|-------|----------|
| GO:0044463~cell projection part | 14    | 1.25% | 0.004533 |
| GO:0043198~dendritic shaft      | 5     | 0.45% | 0.015482 |
| GO:0042995~cell projection      | 33    | 2.95% | 0.033403 |
| GO:0043197~dendritic spine      | 5     | 0.45% | 0.082407 |
| GO:0043005~neuron projection    | 18    | 1.61% | 0.125864 |
| GO:0030425~dendrite             | 11    | 0.98% | 0.130214 |

Median: 0.029417122574276287

Geo: 0.03899252756753423

| Term                                                   | Count | %     | PValue   |
|--------------------------------------------------------|-------|-------|----------|
| aminoacyl-tRNA synthetase                              | 6     | 0.54% | 0.018385 |
| GO:0043039~tRNA aminoacylation                         | 9     | 0.81% | 0.024262 |
| GO:0006418~tRNA aminoacylation for protein synthesis   | 9     | 0.81% | 0.024262 |
| GO:0043038~amino acid activation                       | 9     | 0.81% | 0.024262 |
| GO:0006399~tRNA metabolic process                      | 12    | 1.07% | 0.029253 |
| GO:0016875~ligase activity, forming carbon-carbon bond | 9     | 0.81% | 0.029581 |
| GO:0016876~ligase activity, forming aminoacyl-tRNA     | 9     | 0.81% | 0.029581 |
| GO:0004812~aminoacyl-tRNA ligase activity              | 9     | 0.81% | 0.029581 |
| rno00970:Aminoacyl-tRNA biosynthesis                   | 4     | 0.36% | 0.116794 |
| protein biosynthesis                                   | 11    | 0.98% | 0.349878 |

Median: 0.07501409807774695

Geo: 0.04573781156503287

| Term                                              | Count | %     | PValue   |
|---------------------------------------------------|-------|-------|----------|
| GO:0048193~Golgi vesicle transport                | 13    | 1.16% | 0.007169 |
| GO:0006888~ER to Golgi vesicle-mediated transport | 7     | 0.63% | 0.075014 |
| er-golgi transport                                | 5     | 0.45% | 0.177915 |

Median: 0.06899050268680867

Geo: 0.046416713865919654

| Term                                                 | Count | %     | PValue   |
|------------------------------------------------------|-------|-------|----------|
| outer membrane                                       | 6     | 0.54% | 0.010652 |
| GO:0019867~outer membrane                            | 9     | 0.81% | 0.020773 |
| GO:0005741~mitochondrial outer membrane              | 6     | 0.54% | 0.068991 |
| GO:0031968~organelle outer membrane                  | 6     | 0.54% | 0.118051 |
| topological domain:Mitochondrial intermembrane space | 4     | 0.36% | 0.119556 |

Median: 0.06513242583564044

Geo: 0.05036987687278405

| Term                                         | Count | %     | PValue   |
|----------------------------------------------|-------|-------|----------|
| GO:0016874~ligase activity                   | 34    | 3.04% | 1.59E-04 |
| GO:0016881~acid-amino acid ligase activity   | 15    | 1.34% | 0.04563  |
| GO:0019787~small conjugating protein ligase  | 14    | 1.25% | 0.046039 |
| GO:0016879~ligase activity, forming carbon-r | 17    | 1.52% | 0.047902 |
| GO:0004842~ubiquitin-protein ligase activity | 12    | 1.07% | 0.050809 |
| GO:0008639~small protein conjugating enzyr   | 12    | 1.07% | 0.065132 |
| GO:0006512~ubiquitin cycle                   | 21    | 1.88% | 0.111332 |
| GO:0016567~protein ubiquitination            | 8     | 0.72% | 0.143279 |
| GO:0000209~protein polyubiquitination        | 3     | 0.27% | 0.168192 |
| rno04120:Ubiquitin mediated proteolysis      | 12    | 1.07% | 0.18278  |
| GO:0032446~protein modification by small pr  | 8     | 0.72% | 0.204258 |

Median: 0.0316532809502792

Geo: 0.05575989202701649

| Term                                        | Count | %     | PValue   |
|---------------------------------------------|-------|-------|----------|
| GO:0048468~cell development                 | 89    | 7.96% | 0.005336 |
| GO:0042981~regulation of apoptosis          | 44    | 3.94% | 0.011114 |
| GO:0043067~regulation of programmed cell c  | 44    | 3.94% | 0.01401  |
| GO:0008219~cell death                       | 56    | 5.01% | 0.014591 |
| GO:0016265~death                            | 56    | 5.01% | 0.014591 |
| GO:0048869~cellular developmental process   | 110   | 9.84% | 0.021203 |
| GO:0030154~cell differentiation             | 110   | 9.84% | 0.021203 |
| GO:0006915~apoptosis                        | 52    | 4.65% | 0.028182 |
| GO:0012501~programmed cell death            | 52    | 4.65% | 0.035124 |
| GO:0043066~negative regulation of apoptosis | 18    | 1.61% | 0.138967 |
| GO:0043069~negative regulation of program   | 18    | 1.61% | 0.146863 |
| GO:0006916~anti-apoptosis                   | 12    | 1.07% | 0.266561 |
| GO:0043065~positive regulation of apoptosis | 18    | 1.61% | 0.29451  |
| GO:0043068~positive regulation of programr  | 18    | 1.61% | 0.311435 |
| GO:0006917~induction of apoptosis           | 13    | 1.16% | 0.467993 |
| GO:0012502~induction of programmed cell d   | 13    | 1.16% | 0.475026 |

Median: 0.1562812317333729

Geo: 0.057707693908155444

| Term                                     | Count | %     | PValue   |
|------------------------------------------|-------|-------|----------|
| GO:0005856~cytoskeleton                  | 60    | 5.37% | 0.002472 |
| GO:0044430~cytoskeletal part             | 37    | 3.31% | 0.093461 |
| GO:0043232~intracellular non-membrane-bo | 88    | 7.87% | 0.219101 |
| GO:0043228~non-membrane-bound organell   | 88    | 7.87% | 0.219101 |

Median: 0.06825579194341394

Geo: 0.06084916171997176

| Term                                | Count | %     | PValue   |
|-------------------------------------|-------|-------|----------|
| IPR006689:ARF/SAR superfamily       | 5     | 0.45% | 0.041646 |
| IPR006688:ADP-ribosylation factor   | 4     | 0.36% | 0.066748 |
| SM00177:ARF                         | 4     | 0.36% | 0.069764 |
| PIRSF001711:ADP-ribosylation factor | 4     | 0.36% | 0.070693 |

Median: 0.142736866623424

Geo: 0.0615377040316669

| Term                                        | Count | %      | PValue   |
|---------------------------------------------|-------|--------|----------|
| GO:0065007~biological regulation            | 277   | 24.78% | 1.82E-05 |
| GO:0050789~regulation of biological process | 237   | 21.20% | 6.06E-04 |
| GO:0050794~regulation of cellular process   | 210   | 18.78% | 0.001453 |
| GO:0005634~nucleus                          | 184   | 16.46% | 0.005189 |
| GO:0003676~nucleic acid binding             | 160   | 14.31% | 0.018851 |
| GO:0019222~regulation of metabolic process  | 125   | 11.18% | 0.037235 |
| GO:0006139~nucleobase, nucleoside, nucleot  | 171   | 15.30% | 0.051081 |
| GO:0003677~DNA binding                      | 96    | 8.59%  | 0.081483 |
| GO:0031323~regulation of cellular metabolic | 115   | 10.29% | 0.098182 |
| GO:0010468~regulation of gene expression    | 107   | 9.57%  | 0.117897 |
| GO:0010467~gene expression                  | 153   | 13.69% | 0.133621 |
| GO:0016070~RNA metabolic process            | 116   | 10.38% | 0.151853 |
| Transcription regulation                    | 35    | 3.13%  | 0.152907 |
| Transcription                               | 35    | 3.13%  | 0.176114 |
| GO:0006350~transcription                    | 100   | 8.94%  | 0.289473 |
| GO:0045449~regulation of transcription      | 94    | 8.41%  | 0.302651 |
| GO:0019219~regulation of nucleobase, nucle  | 95    | 8.50%  | 0.390213 |
| GO:0006355~regulation of transcription, DNA | 84    | 7.51%  | 0.393237 |
| GO:0006351~transcription, DNA-dependent     | 86    | 7.69%  | 0.51837  |
| GO:0032774~RNA biosynthetic process         | 86    | 7.69%  | 0.526486 |
| GO:0030528~transcription regulator activity | 66    | 5.90%  | 0.563567 |
| GO:0003700~transcription factor activity    | 43    | 3.85%  | 0.721366 |

Median: 0.2068132443128243

Geo: 0.06384945590624247

| Term                                            | Count | %     | PValue   |
|-------------------------------------------------|-------|-------|----------|
| lipoprotein                                     | 35    | 3.13% | 0.004159 |
| lipid moiety-binding region:S-palmitoyl cysteir | 12    | 1.07% | 0.206813 |
| Palmitate                                       | 12    | 1.07% | 0.302654 |

Median: 0.05902448559063275

Geo: 0.06952667627562897

| Term                                    | Count | %      | PValue   |
|-----------------------------------------|-------|--------|----------|
| GO:0008270~zinc ion binding             | 90    | 8.05%  | 0.027333 |
| GO:0043167~ion binding                  | 172   | 15.38% | 0.047907 |
| GO:0046872~metal ion binding            | 167   | 14.94% | 0.059024 |
| GO:0046914~transition metal ion binding | 109   | 9.75%  | 0.084958 |
| GO:0043169~cation binding               | 150   | 13.42% | 0.247418 |

Median: 0.08069942792163615

Geo: 0.07022645291284828

| Term                                            | Count | %     | PValue   |
|-------------------------------------------------|-------|-------|----------|
| lipid moiety-binding region:N-myristoyl glycine | 9     | 0.81% | 0.01454  |
| myristate                                       | 9     | 0.81% | 0.017341 |
| myristylation                                   | 6     | 0.54% | 0.018385 |
| blocked amino end                               | 6     | 0.54% | 0.143013 |
| nucleotide binding                              | 6     | 0.54% | 0.406721 |
| P-loop                                          | 6     | 0.54% | 0.444845 |

| Median: 0.052526849789520304               | Geo: 0.07343970394205135 |       |          |
|--------------------------------------------|--------------------------|-------|----------|
| Term                                       | Count                    | %     | PValue   |
| GO:0006584~catecholamine metabolic proce   | 6                        | 0.54% | 0.019824 |
| GO:0018958~phenol metabolic process        | 6                        | 0.54% | 0.02286  |
| GO:0006576~biogenic amine metabolic proce  | 10                       | 0.89% | 0.022861 |
| GO:0006575~amino acid derivative metabolic | 12                       | 1.07% | 0.052527 |
| GO:0042133~neurotransmitter metabolic pro  | 5                        | 0.45% | 0.181854 |
| GO:0042417~dopamine metabolic process      | 3                        | 0.27% | 0.297004 |
| GO:0006725~aromatic compound metabolic p   | 10                       | 0.89% | 0.392012 |

| Median: 0.08857971092806124                   | Geo: 0.07428537664101921 |       |          |
|-----------------------------------------------|--------------------------|-------|----------|
| Term                                          | Count                    | %     | PValue   |
| rno04130:SNARE interactions in vesicular tran | 7                        | 0.63% | 0.027406 |
| IPR006012:Syntaxin/epimorphin coiled-coil     | 4                        | 0.36% | 0.046104 |
| domain:t-SNARE coiled-coil homology           | 4                        | 0.36% | 0.053705 |
| IPR006011:Syntaxin, N-terminal                | 3                        | 0.27% | 0.08858  |
| SM00503:SynN                                  | 3                        | 0.27% | 0.091493 |
| IPR000727:Target SNARE coiled-coil region     | 4                        | 0.36% | 0.147697 |
| SM00397:t_SNARE                               | 4                        | 0.36% | 0.153687 |

| Median: 0.062429438292995174                    | Geo: 0.07578489960391194 |       |          |
|-------------------------------------------------|--------------------------|-------|----------|
| Term                                            | Count                    | %     | PValue   |
| lipid moiety-binding region:N-myristoyl glycine | 9                        | 0.81% | 0.01454  |
| myristate                                       | 9                        | 0.81% | 0.017341 |
| calcium-binding region:1                        | 8                        | 0.72% | 0.019181 |
| domain:EF-hand 3                                | 7                        | 0.63% | 0.02202  |
| calcium-binding region:2                        | 7                        | 0.63% | 0.046167 |
| IPR002048:Calcium-binding EF-hand               | 14                       | 1.25% | 0.056269 |
| domain:EF-hand 2                                | 9                        | 0.81% | 0.057434 |
| domain:EF-hand 4                                | 5                        | 0.45% | 0.058266 |
| IPR011992:EF-Hand type                          | 14                       | 1.25% | 0.062354 |
| SM00054:EFh                                     | 14                       | 1.25% | 0.062505 |
| PIRSF002350:calmodulin                          | 4                        | 0.36% | 0.070693 |
| domain:EF-hand 1                                | 8                        | 0.72% | 0.090052 |
| calcium                                         | 30                       | 2.68% | 0.152543 |
| calcium-binding region:3                        | 3                        | 0.27% | 0.246277 |
| IPR001125:Recoverin                             | 3                        | 0.27% | 0.273309 |
| Signal transduction mechanisms / Cytoskeleto    | 6                        | 0.54% | 0.282244 |
| EF hand                                         | 4                        | 0.36% | 0.294715 |
| calcium binding                                 | 5                        | 0.45% | 0.346603 |

| Median: 0.08419109283311178         | Geo: 0.07865101152463738 |       |          |
|-------------------------------------|--------------------------|-------|----------|
| Term                                | Count                    | %     | PValue   |
| GO:0008289~lipid binding            | 27                       | 2.42% | 0.034511 |
| GO:0005543~phospholipid binding     | 15                       | 1.34% | 0.084191 |
| GO:0035091~phosphoinositide binding | 10                       | 0.89% | 0.167453 |

Median: 0.06749757640491225      Geo: 0.08163632183901466

| Term                              | Count | %     | PValue   |
|-----------------------------------|-------|-------|----------|
| GO:0006396~RNA processing         | 26    | 2.33% | 0.021741 |
| GO:0006397~mRNA processing        | 16    | 1.43% | 0.027483 |
| mrna processing                   | 10    | 0.89% | 0.03976  |
| GO:0016071~mRNA metabolic process | 16    | 1.43% | 0.095236 |
| mrna splicing                     | 6     | 0.54% | 0.279462 |
| GO:0008380~RNA splicing           | 9     | 0.81% | 0.468157 |

Median: 0.08367445242528601

Geo: 0.09325118835443283

| Term                                     | Count | %     | PValue   |
|------------------------------------------|-------|-------|----------|
| GO:0019226~transmission of nerve impulse | 39    | 3.49% | 0.008986 |
| GO:0007268~synaptic transmission         | 35    | 3.13% | 0.009379 |
| GO:0007267~cell-cell signaling           | 49    | 4.38% | 0.083674 |
| GO:0003008~system process                | 69    | 6.17% | 1        |
| GO:0050877~neurological system process   | 57    | 5.10% | 1        |

Median: 0.10197451032252433

Geo: 0.09443930654308128

| Term                                          | Count | %     | PValue   |
|-----------------------------------------------|-------|-------|----------|
| GO:0008285~negative regulation of cell prolif | 22    | 1.97% | 0.021171 |
| GO:0042127~regulation of cell proliferation   | 37    | 3.31% | 0.101975 |
| GO:0008283~cell proliferation                 | 45    | 4.03% | 0.390141 |

Median: 0.07380752782690993

Geo: 0.09919375989807463

| Term                                      | Count | %     | PValue   |
|-------------------------------------------|-------|-------|----------|
| GO:0006536~glutamate metabolic process    | 3     | 0.27% | 0.072716 |
| rno00251:Glutamate metabolism             | 5     | 0.45% | 0.073808 |
| GO:0009064~glutamine family amino acid me | 5     | 0.45% | 0.181854 |

Median: 0.15290711979150115

Geo: 0.10087618409325069

| Term                     | Count | %     | PValue   |
|--------------------------|-------|-------|----------|
| repressor                | 12    | 1.07% | 0.02792  |
| nucleus                  | 91    | 8.14% | 0.033644 |
| Transcription regulation | 35    | 3.13% | 0.152907 |
| Transcription            | 35    | 3.13% | 0.176114 |
| dna-binding              | 34    | 3.04% | 0.412953 |

Median: 0.1309296131274359

Geo: 0.10616709332351958

| Term          | Count | %     | PValue   |
|---------------|-------|-------|----------|
| domain:BAR    | 3     | 0.27% | 0.057758 |
| IPR004148:BAR | 3     | 0.27% | 0.13093  |
| SM00721:BAR   | 3     | 0.27% | 0.158241 |

Median: 0.10584057003619658

Geo: 0.10679216096906936

| Term                                     | Count | %     | PValue   |
|------------------------------------------|-------|-------|----------|
| GO:0005100~Rho GTPase activator activity | 4     | 0.36% | 0.053969 |
| GO:0005096~GTPase activator activity     | 12    | 1.07% | 0.085486 |
| GO:0043087~regulation of GTPase activity | 7     | 0.63% | 0.105841 |
| gtpase activation                        | 5     | 0.45% | 0.141009 |

GO:0005099~Ras GTPase activator activity 6 0.54% 0.201724

Median: 0.10189181414834529

Geo: 0.10949812218825965

| Term                                                             | Count | %     | PValue   |
|------------------------------------------------------------------|-------|-------|----------|
| GO:0019725~cellular homeostasis                                  | 29    | 2.59% | 0.014671 |
| GO:0042592~homeostatic process                                   | 36    | 3.22% | 0.02805  |
| GO:0006875~cellular metal ion homeostasis                        | 14    | 1.25% | 0.088302 |
| GO:0055065~metal ion homeostasis                                 | 14    | 1.25% | 0.088302 |
| GO:0006873~cellular ion homeostasis                              | 20    | 1.79% | 0.091552 |
| GO:0055082~cellular chemical homeostasis                         | 20    | 1.79% | 0.091552 |
| GO:0006874~cellular calcium ion homeostasis                      | 13    | 1.16% | 0.093013 |
| GO:0055074~calcium ion homeostasis                               | 13    | 1.16% | 0.093013 |
| GO:0065008~regulation of biological quality                      | 59    | 5.28% | 0.101892 |
| GO:0050801~ion homeostasis                                       | 21    | 1.88% | 0.117543 |
| GO:0030003~cellular cation homeostasis                           | 17    | 1.52% | 0.128115 |
| GO:0055080~cation homeostasis                                    | 17    | 1.52% | 0.128115 |
| GO:0048878~chemical homeostasis                                  | 22    | 1.97% | 0.204232 |
| GO:0030005~cellular di-, tri-valent inorganic cation homeostasis | 14    | 1.25% | 0.219321 |
| GO:0055066~di-, tri-valent inorganic cation homeostasis          | 14    | 1.25% | 0.219321 |
| GO:0007204~elevation of cytosolic calcium ion concentration      | 7     | 0.63% | 0.307615 |
| GO:0051480~cytosolic calcium ion homeostasis                     | 7     | 0.63% | 0.338314 |

Median: 0.10842151729013733

Geo: 0.11186370049581089

| Term                                                      | Count | %     | PValue   |
|-----------------------------------------------------------|-------|-------|----------|
| GO:0032012~regulation of ARF protein signal               | 3     | 0.27% | 0.108422 |
| GO:0032011~ARF protein signal transduction                | 3     | 0.27% | 0.108422 |
| GO:0005086~ARF guanyl-nucleotide exchange factor activity | 3     | 0.27% | 0.119079 |

Median: 0.1076855020720717

Geo: 0.11547631425780384

| Term                                                              | Count | %     | PValue   |
|-------------------------------------------------------------------|-------|-------|----------|
| rno00510:N-Glycan biosynthesis                                    | 8     | 0.72% | 0.013869 |
| GO:0009100~glycoprotein metabolic process                         | 13    | 1.16% | 0.054018 |
| rno01030:Glycan structures - biosynthesis 1                       | 12    | 1.07% | 0.088684 |
| GO:0016757~transferase activity, transferring glycosyl groups     | 17    | 1.52% | 0.098527 |
| GO:0006486~protein amino acid glycosylation                       | 10    | 0.89% | 0.107686 |
| GO:0043413~biopolymer glycosylation                               | 10    | 0.89% | 0.118084 |
| GO:0009101~glycoprotein biosynthetic process                      | 10    | 0.89% | 0.152395 |
| GO:0016758~transferase activity, transferring glycosyltransferase | 10    | 0.89% | 0.369148 |
| GO:0016758~transferase activity, transferring glycosyltransferase | 7     | 0.63% | 0.779679 |

Median: 0.1258641009200506

Geo: 0.11806714660258627

| Term                         | Count | %     | PValue   |
|------------------------------|-------|-------|----------|
| GO:0030424~axon              | 10    | 0.89% | 0.076941 |
| GO:0043005~neuron projection | 18    | 1.61% | 0.125864 |
| GO:0043025~cell soma         | 10    | 0.89% | 0.169952 |

Median: 0.1677959048829996

Geo: 0.11965887011097136

| Term | Count | % | PValue |
|------|-------|---|--------|
|------|-------|---|--------|



|                                            |    |       |          |
|--------------------------------------------|----|-------|----------|
| GO:0007010~cytoskeleton organization and t | 37 | 3.31% | 0.029817 |
| GO:0007015~actin filament organization     | 7  | 0.63% | 0.092817 |
| GO:0030036~actin cytoskeleton organization | 14 | 1.25% | 0.242775 |
| GO:0030029~actin filament-based process    | 14 | 1.25% | 0.305131 |

Median: 0.18185380918816363

Geo: 0.12058492068067901

| Term                                       | Count | %     | PValue   |
|--------------------------------------------|-------|-------|----------|
| GO:0008652~amino acid biosynthetic process | 7     | 0.63% | 0.045807 |
| GO:0009064~glutamine family amino acid me  | 5     | 0.45% | 0.181854 |
| GO:0009084~glutamine family amino acid bic | 3     | 0.27% | 0.210485 |

Median: 0.13346020508450196

Geo: 0.1210625157076649

| Term                                           | Count | %     | PValue   |
|------------------------------------------------|-------|-------|----------|
| GO:0051246~regulation of protein metabolic     | 22    | 1.97% | 0.040026 |
| GO:0022618~protein-RNA complex assembly        | 10    | 0.89% | 0.053362 |
| GO:0009889~regulation of biosynthetic proce    | 16    | 1.43% | 0.060281 |
| GO:0006413~translational initiation            | 7     | 0.63% | 0.092817 |
| GO:0008135~translation factor activity, nucle  | 9     | 0.81% | 0.104059 |
| GO:0003743~translation initiation factor activ | 6     | 0.54% | 0.129377 |
| GO:0006446~regulation of translational initia  | 5     | 0.45% | 0.137543 |
| GO:0022613~ribonucleoprotein complex biog      | 12    | 1.07% | 0.150133 |
| GO:0045182~translation regulator activity      | 9     | 0.81% | 0.175896 |
| GO:0031326~regulation of cellular biosynthet   | 12    | 1.07% | 0.207834 |
| initiation factor                              | 4     | 0.36% | 0.277076 |
| GO:0006417~regulation of translation           | 10    | 0.89% | 0.294521 |

Median: 0.1803019793844538

Geo: 0.12215092015596596

| Term                                          | Count | %     | PValue   |
|-----------------------------------------------|-------|-------|----------|
| GO:0051301~cell division                      | 16    | 1.43% | 0.002944 |
| GO:0000278~mitotic cell cycle                 | 23    | 2.06% | 0.017947 |
| GO:0022403~cell cycle phase                   | 22    | 1.97% | 0.080816 |
| cell cycle                                    | 15    | 1.34% | 0.121315 |
| cell division                                 | 9     | 0.81% | 0.125236 |
| GO:0051329~interphase of mitotic cell cycle   | 8     | 0.72% | 0.172594 |
| GO:0051325~interphase                         | 8     | 0.72% | 0.180302 |
| GO:0051318~G1 phase                           | 3     | 0.27% | 0.210485 |
| GO:0000279~M phase                            | 15    | 1.34% | 0.249235 |
| GO:0007067~mitosis                            | 11    | 0.98% | 0.302128 |
| mitosis                                       | 5     | 0.45% | 0.302678 |
| GO:0000087~M phase of mitotic cell cycle      | 11    | 0.98% | 0.332362 |
| GO:0000082~G1/S transition of mitotic cell cy | 4     | 0.36% | 0.418699 |

Median: 0.11267688765907659

Geo: 0.1268010744333647

| Term                                         | Count | %     | PValue   |
|----------------------------------------------|-------|-------|----------|
| GO:0035258~steroid hormone receptor bindir   | 5     | 0.45% | 0.025487 |
| GO:0030518~steroid hormone receptor signa    | 6     | 0.54% | 0.047282 |
| GO:0050681~androgen receptor binding         | 4     | 0.36% | 0.053969 |
| GO:0003713~transcription coactivator activit | 14    | 1.25% | 0.060449 |

|                                              |    |       |          |
|----------------------------------------------|----|-------|----------|
| GO:0030522~intracellular receptor-mediated   | 6  | 0.54% | 0.097158 |
| GO:0030521~androgen receptor signaling pa    | 4  | 0.36% | 0.128196 |
| GO:0035257~nuclear hormone receptor bindi    | 6  | 0.54% | 0.211598 |
| GO:0051427~hormone receptor binding          | 6  | 0.54% | 0.242086 |
| GO:0046966~thyroid hormone receptor bindii   | 3  | 0.27% | 0.610061 |
| GO:0045944~positive regulation of transcript | 10 | 0.89% | 0.702208 |

Median: 0.10065090511468879

Geo: 0.1276364001100667

| Term                                         | Count | %     | PValue   |
|----------------------------------------------|-------|-------|----------|
| pyridoxal phosphate                          | 7     | 0.63% | 0.047012 |
| GO:0008483~transaminase activity             | 5     | 0.45% | 0.051374 |
| aminotransferase                             | 4     | 0.36% | 0.076229 |
| GO:0016769~transferase activity, transferrin | 5     | 0.45% | 0.095855 |
| IPR015421:Pyridoxal phosphate-dependent tr   | 5     | 0.45% | 0.100651 |
| GO:0019842~vitamin binding                   | 10    | 0.89% | 0.155451 |
| GO:0030170~pyridoxal phosphate binding       | 5     | 0.45% | 0.256409 |
| binding site:Pyridoxal phosphate (covalent)  | 4     | 0.36% | 0.258983 |
| GO:0048037~cofactor binding                  | 14    | 1.25% | 0.490306 |

Median: 0.09004221777709542

Geo: 0.13237772337733444

| Term                                        | Count | %     | PValue   |
|---------------------------------------------|-------|-------|----------|
| GO:0048583~regulation of response to stimul | 9     | 0.81% | 0.01677  |
| GO:0032107~regulation of response to nutrie | 3     | 0.27% | 0.072716 |
| GO:0032104~regulation of response to extrac | 3     | 0.27% | 0.072716 |
| GO:0032095~regulation of response to food   | 3     | 0.27% | 0.072716 |
| GO:0032101~regulation of response to exterr | 3     | 0.27% | 0.090042 |
| GO:0032094~response to food                 | 3     | 0.27% | 0.127677 |
| GO:0031667~response to nutrient levels      | 8     | 0.72% | 0.507172 |
| GO:0009991~response to extracellular stimul | 8     | 0.72% | 0.552089 |
| GO:0007584~response to nutrient             | 6     | 0.54% | 0.601449 |

Median: 0.24146442504751328

Geo: 0.1327707699357756

| Term                                       | Count | %      | PValue   |
|--------------------------------------------|-------|--------|----------|
| GO:0032502~developmental process           | 184   | 16.46% | 0.015368 |
| GO:0048869~cellular developmental process  | 110   | 9.84%  | 0.021203 |
| GO:0030154~cell differentiation            | 110   | 9.84%  | 0.021203 |
| GO:0007275~multicellular organismal develo | 131   | 11.72% | 0.100626 |
| GO:0048856~anatomical structure developm   | 118   | 10.55% | 0.382303 |
| GO:0048731~system development              | 101   | 9.03%  | 0.421206 |
| GO:0048513~organ development               | 65    | 5.81%  | 0.862571 |
| GO:0032501~multicellular organismal proces | 185   | 16.55% | 0.999998 |

Median: 0.17519858930582505

Geo: 0.1329722840960057

| Term                                       | Count | %     | PValue   |
|--------------------------------------------|-------|-------|----------|
| GO:0006626~protein targeting to mitochondr | 5     | 0.45% | 0.017079 |
| GO:0006839~mitochondrial transport         | 6     | 0.54% | 0.082855 |
| GO:0007005~mitochondrion organization and  | 7     | 0.63% | 0.267542 |
| GO:0044455~mitochondrial membrane part     | 3     | 0.27% | 0.825805 |

Median: 0.10305094387637022

Geo: 0.1330202062600308

| Term                                          | Count | %     | PValue   |
|-----------------------------------------------|-------|-------|----------|
| GO:0001937~negative regulation of endothel    | 3     | 0.27% | 0.090042 |
| GO:0001935~endothelial cell proliferation     | 4     | 0.36% | 0.103051 |
| GO:0001936~regulation of endothelial cell pro | 3     | 0.27% | 0.253662 |

Median: 0.11990710670990666

Geo: 0.13685778237651414

| Term                                         | Count | %     | PValue   |
|----------------------------------------------|-------|-------|----------|
| GO:0007187~G-protein signaling, coupled to   | 14    | 1.25% | 0.031366 |
| GO:0019935~cyclic-nucleotide-mediated sign   | 14    | 1.25% | 0.065869 |
| GO:0007188~G-protein signaling, coupled to   | 11    | 0.98% | 0.066354 |
| GO:0045761~regulation of adenylate cyclase   | 6     | 0.54% | 0.097158 |
| GO:0051339~regulation of lyase activity      | 6     | 0.54% | 0.11262  |
| GO:0031279~regulation of cyclase activity    | 6     | 0.54% | 0.11262  |
| GO:0019933~cAMP-mediated signaling           | 11    | 0.98% | 0.127194 |
| GO:0007190~adenylate cyclase activation      | 4     | 0.36% | 0.213759 |
| GO:0051349~positive regulation of lyase acti | 4     | 0.36% | 0.244569 |
| GO:0045762~positive regulation of adenylate  | 4     | 0.36% | 0.244569 |
| GO:0031281~positive regulation of cyclase ac | 4     | 0.36% | 0.260231 |
| GO:0007189~G-protein signaling, adenylate c  | 4     | 0.36% | 0.603889 |

Median: 0.0908459699550602

Geo: 0.13704169444018185

| Term                                         | Count | %     | PValue   |
|----------------------------------------------|-------|-------|----------|
| IPR003958:Transcription factor CBF/NF-Y/arch | 3     | 0.27% | 0.035936 |
| IPR009072:Histone-fold                       | 4     | 0.36% | 0.090846 |
| Transcription                                | 3     | 0.27% | 0.788366 |

Median: 0.13734646667265776

Geo: 0.14002507969953631

| Term                                         | Count | %     | PValue   |
|----------------------------------------------|-------|-------|----------|
| GO:0005798~Golgi-associated vesicle          | 8     | 0.72% | 0.034523 |
| GO:0012506~vesicle membrane                  | 11    | 0.98% | 0.037788 |
| IPR008152:Clathrin adaptor, alpha/beta/gamn  | 3     | 0.27% | 0.051649 |
| SM00809:Alpha_adaptinC2                      | 3     | 0.27% | 0.053424 |
| GO:0030659~cytoplasmic vesicle membrane      | 8     | 0.72% | 0.092881 |
| GO:0030133~transport vesicle                 | 6     | 0.54% | 0.095371 |
| GO:0044433~cytoplasmic vesicle part          | 9     | 0.81% | 0.109754 |
| GO:0048475~coated membrane                   | 6     | 0.54% | 0.134454 |
| GO:0030117~membrane coat                     | 6     | 0.54% | 0.134454 |
| GO:0030118~clathrin coat                     | 5     | 0.45% | 0.137346 |
| GO:0030140~trans-Golgi network transport v   | 4     | 0.36% | 0.159338 |
| GO:0030130~clathrin coat of trans-Golgi netw | 3     | 0.27% | 0.201342 |
| GO:0030120~vesicle coat                      | 5     | 0.45% | 0.239078 |
| GO:0012510~trans-Golgi network transport v   | 3     | 0.27% | 0.243116 |
| GO:0030125~clathrin vesicle coat             | 4     | 0.36% | 0.276901 |
| GO:0030662~coated vesicle membrane           | 5     | 0.45% | 0.288866 |
| GO:0030665~clathrin coated vesicle membra    | 4     | 0.36% | 0.307779 |
| GO:0030658~transport vesicle membrane        | 3     | 0.27% | 0.368185 |

GO:0030660~Golgi-associated vesicle membr 3 0.27% 0.408313

Median: 0.1361326064824238

Geo: 0.1440097981822845

| Term                                          | Count | %     | PValue   |
|-----------------------------------------------|-------|-------|----------|
| GO:0002761~regulation of myeloid leukocyte    | 6     | 0.54% | 0.008587 |
| GO:0002762~negative regulation of myeloid l   | 4     | 0.36% | 0.016525 |
| GO:0045637~regulation of myeloid cell differ  | 7     | 0.63% | 0.024981 |
| GO:0002573~myeloid leukocyte differentiatio   | 6     | 0.54% | 0.063669 |
| GO:0045638~negative regulation of myeloid c   | 4     | 0.36% | 0.069637 |
| GO:0045670~regulation of osteoclast differen  | 4     | 0.36% | 0.069637 |
| GO:0030316~osteoclast differentiation         | 4     | 0.36% | 0.091299 |
| GO:0048534~hemopoietic or lymphoid organ      | 17    | 1.52% | 0.093025 |
| GO:0030097~hemopoiesis                        | 16    | 1.43% | 0.098623 |
| GO:0002520~immune system development          | 17    | 1.52% | 0.116874 |
| GO:0051093~negative regulation of developn    | 9     | 0.81% | 0.136133 |
| GO:0030099~myeloid cell differentiation       | 9     | 0.81% | 0.155467 |
| GO:0045639~positive regulation of myeloid c   | 3     | 0.27% | 0.253662 |
| GO:0050793~regulation of developmental prc    | 20    | 1.79% | 0.270145 |
| GO:0051094~positive regulation of developm    | 8     | 0.72% | 0.319107 |
| GO:0045596~negative regulation of cell differ | 6     | 0.54% | 0.33732  |
| GO:0002521~leukocyte differentiation          | 8     | 0.72% | 0.385125 |
| GO:0045595~regulation of cell differentiation | 12    | 1.07% | 0.477352 |
| GO:0045597~positive regulation of cell differ | 4     | 0.36% | 0.754627 |
| GO:0045165~cell fate commitment               | 3     | 0.27% | 0.955029 |
| GO:0002376~immune system process              | 33    | 2.95% | 0.956468 |

Median: 0.3508793236375377

Geo: 0.14658367233857106

| Term                                        | Count | %     | PValue   |
|---------------------------------------------|-------|-------|----------|
| GO:0048489~synaptic vesicle transport       | 9     | 0.81% | 0.004764 |
| GO:0001505~regulation of neurotransmitter l | 13    | 1.16% | 0.089241 |
| GO:0016079~synaptic vesicle exocytosis      | 4     | 0.36% | 0.16939  |
| GO:0003001~generation of a signal involved  | 10    | 0.89% | 0.350879 |
| GO:0045055~regulated secretory pathway      | 8     | 0.72% | 0.356681 |
| GO:0007269~neurotransmitter secretion       | 7     | 0.63% | 0.390062 |
| GO:0006887~exocytosis                       | 8     | 0.72% | 0.413622 |

Median: 0.43415643114745134

Geo: 0.14675904481537738

| Term                                        | Count | %     | PValue   |
|---------------------------------------------|-------|-------|----------|
| GO:0048583~regulation of response to stimul | 9     | 0.81% | 0.01677  |
| GO:0031347~regulation of defense response   | 4     | 0.36% | 0.434156 |
| GO:0050727~regulation of inflammatory resp  | 4     | 0.36% | 0.434156 |

Median: 0.24998858310372712

Geo: 0.15290988756460436

| Term                  | Count | %     | PValue   |
|-----------------------|-------|-------|----------|
| wd repeat             | 13    | 1.16% | 0.025128 |
| IPR001680:WD40 repeat | 13    | 1.16% | 0.035564 |
| SM00320:WD40          | 13    | 1.16% | 0.053411 |
| repeat:WD 6           | 5     | 0.45% | 0.170135 |

|             |   |       |          |
|-------------|---|-------|----------|
| repeat:WD 5 | 5 | 0.45% | 0.242372 |
| repeat:WD 4 | 5 | 0.45% | 0.257606 |
| repeat:WD 3 | 5 | 0.45% | 0.288595 |
| repeat:WD 2 | 5 | 0.45% | 0.304286 |
| repeat:WD 1 | 5 | 0.45% | 0.304286 |
| repeat:WD 7 | 3 | 0.27% | 0.5158   |

Median: 0.15565765283845925

Geo: 0.1529854602605251

| Term                                     | Count | %     | PValue   |
|------------------------------------------|-------|-------|----------|
| GO:0051186~cofactor metabolic process    | 20    | 1.79% | 0.055485 |
| GO:0006732~coenzyme metabolic process    | 17    | 1.52% | 0.067256 |
| GO:0051188~cofactor biosynthetic process | 9     | 0.81% | 0.244059 |
| GO:0009108~coenzyme biosynthetic process | 6     | 0.54% | 0.601449 |

Median: 0.15899314901573366

Geo: 0.15637827340600607

| Term                                       | Count | %     | PValue   |
|--------------------------------------------|-------|-------|----------|
| GO:0000302~response to reactive oxygen sp  | 6     | 0.54% | 0.069757 |
| GO:0009725~response to hormone stimulus    | 15    | 1.34% | 0.083759 |
| GO:0043627~response to estrogen stimulus   | 6     | 0.54% | 0.146779 |
| GO:0006979~response to oxidative stress    | 10    | 0.89% | 0.171207 |
| GO:0042542~response to hydrogen peroxide   | 4     | 0.36% | 0.183882 |
| GO:0048545~response to steroid hormone sti | 7     | 0.63% | 0.541646 |

Median: 0.3508793236375377

Geo: 0.1679204348599385

| Term                                          | Count | %     | PValue   |
|-----------------------------------------------|-------|-------|----------|
| GO:0065009~regulation of a molecular functi   | 40    | 3.58% | 0.01017  |
| GO:0050790~regulation of catalytic activity   | 36    | 3.22% | 0.012368 |
| GO:0043085~positive regulation of catalytic a | 22    | 1.97% | 0.029565 |
| GO:0043549~regulation of kinase activity      | 17    | 1.52% | 0.156675 |
| GO:0051338~regulation of transferase activit  | 17    | 1.52% | 0.188353 |
| GO:0045859~regulation of protein kinase acti  | 16    | 1.43% | 0.201339 |
| GO:0033674~positive regulation of kinase act  | 10    | 0.89% | 0.350879 |
| GO:0051347~positive regulation of transferas  | 10    | 0.89% | 0.392012 |
| GO:0007200~G-protein signaling, coupled to    | 7     | 0.63% | 0.400431 |
| GO:0032147~activation of protein kinase acti  | 5     | 0.45% | 0.438703 |
| GO:0045860~positive regulation of protein ki  | 9     | 0.81% | 0.459439 |
| GO:0007205~protein kinase C activation        | 3     | 0.27% | 0.553633 |
| GO:0000165~MAPKKK cascade                     | 10    | 0.89% | 0.621474 |

Median: 0.200554335921077

Geo: 0.16822064139055293

| Term                                        | Count | %     | PValue   |
|---------------------------------------------|-------|-------|----------|
| PIRSF001741:membrane-associated guanylate   | 3     | 0.27% | 0.023567 |
| SM00072:GuKc                                | 5     | 0.45% | 0.026247 |
| GO:0008022~protein C-terminus binding       | 8     | 0.72% | 0.029859 |
| domain:Guanylate kinase-like                | 3     | 0.27% | 0.057758 |
| domain:SH3                                  | 7     | 0.63% | 0.075448 |
| IPR008145:Guanylate kinase/L-type calcium c | 4     | 0.36% | 0.07839  |
| domain:PDZ 3                                | 3     | 0.27% | 0.121188 |

|                                         |   |       |          |
|-----------------------------------------|---|-------|----------|
| GO:0030165~PDZ domain binding           | 6 | 0.54% | 0.17311  |
| IPR008144:Guanylate kinase domain:PDZ 1 | 3 | 0.27% | 0.200554 |
| domain:PDZ 2                            | 3 | 0.27% | 0.29823  |
| IPR000108:Neutrophil cytosol factor 2   | 3 | 0.27% | 0.345817 |
| IPR001452:Src homology-3                | 9 | 0.81% | 0.397693 |
| SM00326:SH3                             | 9 | 0.81% | 0.46892  |
| SH3 domain                              | 8 | 0.72% | 0.47937  |
| IPR001478:PDZ/DHR/GLGF                  | 3 | 0.27% | 0.971386 |
| SM00228:PDZ                             | 3 | 0.27% | 0.975655 |

Median: 0.10305094387637022

Geo: 0.1746413970914796

| Term                                       | Count | %     | PValue   |
|--------------------------------------------|-------|-------|----------|
| GO:0010003~gastrulation (sensu Mammalia)   | 4     | 0.36% | 0.042285 |
| GO:0001702~gastrulation with mouth forming | 4     | 0.36% | 0.103051 |
| GO:0048276~gastrulation (sensu Vertebrata) | 4     | 0.36% | 0.103051 |
| GO:0007369~gastrulation                    | 4     | 0.36% | 0.479537 |
| GO:0003002~regionalization                 | 6     | 0.54% | 0.754437 |

Median: 0.146778845974888

Geo: 0.175730085063464

| Term                                        | Count | %     | PValue   |
|---------------------------------------------|-------|-------|----------|
| GO:0014070~response to organic cyclic subst | 6     | 0.54% | 0.076153 |
| GO:0043627~response to estrogen stimulus    | 6     | 0.54% | 0.146779 |
| GO:0042493~response to drug                 | 9     | 0.81% | 0.485498 |

Median: 0.2310913261201935

Geo: 0.17766634724831248

| Term                        | Count | %     | PValue   |
|-----------------------------|-------|-------|----------|
| GO:0008270~zinc ion binding | 90    | 8.05% | 0.027333 |
| zinc-finger                 | 34    | 3.04% | 0.155905 |
| zinc                        | 45    | 4.03% | 0.306277 |
| metal-binding               | 60    | 5.37% | 0.763395 |

Median: 0.21535379537979749

Geo: 0.17768583122794948

| Term                                        | Count | %     | PValue   |
|---------------------------------------------|-------|-------|----------|
| GO:0016323~basolateral plasma membrane      | 13    | 1.16% | 0.010827 |
| GO:0005912~adherens junction                | 9     | 0.81% | 0.055736 |
| GO:0005925~focal adhesion                   | 5     | 0.45% | 0.158264 |
| GO:0005924~cell-substrate adherens junction | 5     | 0.45% | 0.191629 |
| GO:0030055~cell-matrix junction             | 5     | 0.45% | 0.239078 |
| GO:0005913~cell-cell adherens junction      | 3     | 0.27% | 0.447158 |
| GO:0030054~cell junction                    | 11    | 0.98% | 0.58202  |
| GO:0005911~intercellular junction           | 6     | 0.54% | 0.872536 |

Median: 0.15546695149387

Geo: 0.17829203345072625

| Term                                      | Count | %     | PValue   |
|-------------------------------------------|-------|-------|----------|
| GO:0005184~neuropeptide hormone activity  | 5     | 0.45% | 0.057794 |
| GO:0007218~neuropeptide signaling pathway | 9     | 0.81% | 0.155467 |
| GO:0005179~hormone activity               | 8     | 0.72% | 0.630778 |

Median: 0.1719070097875019

Geo: 0.17861075696769138

| Term                                         | Count | %     | PValue   |
|----------------------------------------------|-------|-------|----------|
| serine/threonine-specific protein kinase     | 6     | 0.54% | 0.054413 |
| PIRSF000564:kinase-related transforming prot | 4     | 0.36% | 0.171907 |
| rno04340:Hedgehog signaling pathway          | 4     | 0.36% | 0.609158 |

Median: 0.48112562038876727

Geo: 0.1787057436525346

| Term                                         | Count | %     | PValue   |
|----------------------------------------------|-------|-------|----------|
| GO:0044456~synapse part                      | 19    | 1.70% | 2.22E-04 |
| GO:0045202~synapse                           | 27    | 2.42% | 3.62E-04 |
| GO:0045211~postsynaptic membrane             | 12    | 1.07% | 0.018502 |
| GO:0008144~drug binding                      | 4     | 0.36% | 0.240467 |
| synapse                                      | 13    | 1.16% | 0.283011 |
| Postsynaptic cell membrane                   | 8     | 0.72% | 0.384888 |
| GO:0030534~adult behavior                    | 4     | 0.36% | 0.403104 |
| neurotransmitter receptor                    | 5     | 0.45% | 0.462802 |
| GO:0005230~extracellular ligand-gated ion ch | 5     | 0.45% | 0.481126 |
| GO:0030594~neurotransmitter receptor activ   | 7     | 0.63% | 0.565097 |
| cell junction                                | 14    | 1.25% | 0.609355 |
| GO:0042165~neurotransmitter binding          | 7     | 0.63% | 0.642168 |
| IPR006202:Neurotransmitter-gated ion-chann   | 3     | 0.27% | 0.748186 |
| IPR006029:Neurotransmitter-gated ion-chann   | 3     | 0.27% | 0.748186 |
| IPR006201:Neurotransmitter-gated ion-chann   | 3     | 0.27% | 0.748186 |
| GO:0015276~ligand-gated ion channel activit  | 5     | 0.45% | 0.772342 |
| GO:0022834~ligand-gated channel activity     | 5     | 0.45% | 0.772342 |

Median: 0.1803019793844538

Geo: 0.18582633481789906

| Term                                         | Count | %     | PValue   |
|----------------------------------------------|-------|-------|----------|
| GO:0007270~nerve-nerve synaptic transmiss    | 6     | 0.54% | 0.097158 |
| GO:0007612~learning                          | 5     | 0.45% | 0.107637 |
| GO:0048169~regulation of long-term neuron    | 3     | 0.27% | 0.147649 |
| GO:0007611~learning and/or memory            | 8     | 0.72% | 0.180302 |
| GO:0048167~regulation of synaptic plasticity | 6     | 0.54% | 0.194764 |
| GO:0050803~regulation of synapse structure   | 6     | 0.54% | 0.247342 |
| GO:0048168~regulation of neuronal synaptic   | 3     | 0.27% | 0.57052  |

Median: 0.21008051367698122

Geo: 0.18658182674770896

| Term                                        | Count | %     | PValue   |
|---------------------------------------------|-------|-------|----------|
| GO:0006605~protein targeting                | 20    | 1.79% | 0.046078 |
| GO:0017038~protein import                   | 9     | 0.81% | 0.142436 |
| GO:0006913~nucleocytoplasmic transport      | 11    | 0.98% | 0.184392 |
| GO:0051169~nuclear transport                | 11    | 0.98% | 0.210081 |
| GO:0006606~protein import into nucleus      | 7     | 0.63% | 0.267542 |
| GO:0051170~nuclear import                   | 7     | 0.63% | 0.287429 |
| GO:0000060~protein import into nucleus, tra | 3     | 0.27% | 0.402649 |

Median: 0.19868478281630433

Geo: 0.1885086380593916

| Term                                      | Count | %     | PValue   |
|-------------------------------------------|-------|-------|----------|
| GO:0006665~sphingolipid metabolic process | 6     | 0.54% | 0.137856 |
| GO:0006672~ceramide metabolic process     | 4     | 0.36% | 0.198685 |
| GO:0046519~sphingoid metabolic process    | 4     | 0.36% | 0.244569 |

Median: 0.22585340278900806      Geo: 0.18852812202274055

| Term                                        | Count | %     | PValue   |
|---------------------------------------------|-------|-------|----------|
| GO:0015833~peptide transport                | 8     | 0.72% | 0.039498 |
| GO:0046883~regulation of hormone secretior  | 5     | 0.45% | 0.089544 |
| GO:0002790~peptide secretion                | 5     | 0.45% | 0.107637 |
| GO:0046888~negative regulation of hormone   | 3     | 0.27% | 0.189177 |
| GO:0030073~insulin secretion                | 4     | 0.36% | 0.198685 |
| GO:0046879~hormone secretion                | 6     | 0.54% | 0.225853 |
| GO:0050796~regulation of insulin secretion  | 3     | 0.27% | 0.232012 |
| GO:0030072~peptide hormone secretion        | 4     | 0.36% | 0.260231 |
| GO:0003001~generation of a signal involved  | 10    | 0.89% | 0.350879 |
| GO:0051046~regulation of secretion          | 7     | 0.63% | 0.369321 |
| GO:0051048~negative regulation of secretior | 3     | 0.27% | 0.422933 |

Median: 0.20076639204212415      Geo: 0.19510207483180358

| Term                             | Count | %     | PValue   |
|----------------------------------|-------|-------|----------|
| IPR001841:Zinc finger, RING-type | 11    | 0.98% | 0.152621 |
| SM00184:RING                     | 11    | 0.98% | 0.200766 |
| zinc finger region:RING-type     | 5     | 0.45% | 0.242372 |

Median: 0.17259375798038148      Geo: 0.19665995517085125

| Term                                         | Count | %     | PValue   |
|----------------------------------------------|-------|-------|----------|
| GO:0040011~locomotion                        | 9     | 0.81% | 0.096192 |
| GO:0030334~regulation of cell migration      | 7     | 0.63% | 0.1582   |
| GO:0040013~negative regulation of locomoti   | 4     | 0.36% | 0.16939  |
| GO:0040012~regulation of locomotion          | 8     | 0.72% | 0.172594 |
| GO:0051270~regulation of cell motility       | 7     | 0.63% | 0.238419 |
| GO:0030336~negative regulation of cell migr  | 3     | 0.27% | 0.297004 |
| GO:0051271~negative regulation of cell motil | 3     | 0.27% | 0.361117 |

Median: 0.1927075177175326      Geo: 0.19770529455139862

| Term                                          | Count | %     | PValue   |
|-----------------------------------------------|-------|-------|----------|
| GO:0009056~catabolic process                  | 46    | 4.11% | 0.060783 |
| GO:0044248~cellular catabolic process         | 39    | 3.49% | 0.068095 |
| GO:0030163~protein catabolic process          | 16    | 1.43% | 0.12049  |
| GO:0006511~ubiquitin-dependent protein cat    | 12    | 1.07% | 0.134647 |
| GO:0043632~modification-dependent macror      | 12    | 1.07% | 0.144872 |
| GO:0019941~modification-dependent protein     | 12    | 1.07% | 0.144872 |
| GO:0051603~proteolysis involved in cellular p | 12    | 1.07% | 0.166495 |
| GO:0044257~cellular protein catabolic proces  | 12    | 1.07% | 0.183691 |
| GO:0004843~ubiquitin-specific protease activ  | 6     | 0.54% | 0.201724 |
| GO:0019783~small conjugating protein-specii   | 6     | 0.54% | 0.211598 |
| GO:0016790~thiolester hydrolase activity      | 7     | 0.63% | 0.228439 |



|                                             |    |       |          |
|---------------------------------------------|----|-------|----------|
| GO:0004221~ubiquitin thiolesterase activity | 5  | 0.45% | 0.318674 |
| GO:0043285~biopolymer catabolic process     | 16 | 1.43% | 0.421516 |
| GO:0044265~cellular macromolecule cataboli  | 19 | 1.70% | 0.425693 |
| GO:0009057~macromolecule catabolic proce:   | 23 | 2.06% | 0.437564 |
| GO:0008234~cysteine-type peptidase activity | 10 | 0.89% | 0.518148 |

Median: 0.3402131629373112

Geo: 0.20091348973280643

| Term                                      | Count | %     | PValue   |
|-------------------------------------------|-------|-------|----------|
| GO:0009058~biosynthetic process           | 98    | 8.77% | 0.01976  |
| GO:0044249~cellular biosynthetic process  | 67    | 5.99% | 0.249013 |
| GO:0009059~macromolecule biosynthetic prc | 50    | 4.47% | 0.431413 |
| GO:0006412~translation                    | 31    | 2.77% | 0.767586 |

Median: 0.15219034199850132

Geo: 0.20388043471441814

| Term                                         | Count | %     | PValue   |
|----------------------------------------------|-------|-------|----------|
| GO:0009892~negative regulation of metaboli   | 28    | 2.50% | 0.082998 |
| GO:0000122~negative regulation of transcrip  | 12    | 1.07% | 0.106427 |
| GO:0016481~negative regulation of transcrip  | 20    | 1.79% | 0.108749 |
| GO:0045892~negative regulation of transcrip  | 15    | 1.34% | 0.145618 |
| GO:0031324~negative regulation of cellular n | 24    | 2.15% | 0.15219  |
| GO:0045934~negative regulation of nucleoba   | 20    | 1.79% | 0.171513 |
| GO:0016564~transcription repressor activity  | 14    | 1.25% | 0.250078 |
| GO:0006357~regulation of transcription from  | 23    | 2.06% | 0.714292 |
| GO:0006366~transcription from RNA polymer    | 25    | 2.24% | 0.933218 |

Median: 0.20425774245182154

Geo: 0.2051856545880777

| Term                                         | Count | %     | PValue   |
|----------------------------------------------|-------|-------|----------|
| GO:0043549~regulation of kinase activity     | 17    | 1.52% | 0.156675 |
| GO:0051338~regulation of transferase activit | 17    | 1.52% | 0.188353 |
| GO:0045859~regulation of protein kinase acti | 16    | 1.43% | 0.201339 |
| GO:0043086~negative regulation of catalytic  | 8     | 0.72% | 0.204258 |
| GO:0006469~negative regulation of protein k  | 6     | 0.54% | 0.225853 |
| GO:0033673~negative regulation of kinase ac  | 6     | 0.54% | 0.225853 |
| GO:0051348~negative regulation of transfera  | 6     | 0.54% | 0.247342 |

Median: 0.24894442110152143

Geo: 0.21358808151445924

| Term                                 | Count | %     | PValue   |
|--------------------------------------|-------|-------|----------|
| IPR013753:Ras                        | 9     | 0.81% | 0.152954 |
| IPR003578:Ras small GTPase, Rho type | 3     | 0.27% | 0.248944 |
| SM00174:RHO                          | 3     | 0.27% | 0.255899 |

Median: 0.23201158734523689

Geo: 0.21679040728369364

| Term                                       | Count | %     | PValue   |
|--------------------------------------------|-------|-------|----------|
| GO:0006665~sphingolipid metabolic process  | 6     | 0.54% | 0.137856 |
| GO:0006687~glycosphingolipid metabolic pro | 3     | 0.27% | 0.232012 |
| GO:0006664~glycolipid metabolic process    | 3     | 0.27% | 0.318554 |

Median: 0.2103440663828989

Geo: 0.21685062964976048

| Term                                        | Count | %     | PValue   |
|---------------------------------------------|-------|-------|----------|
| GO:0050804~regulation of synaptic transmiss | 6     | 0.54% | 0.204959 |
| GO:0031644~regulation of neurological proce | 7     | 0.63% | 0.210344 |
| GO:0051969~regulation of transmission of ne | 6     | 0.54% | 0.236529 |

Median: 0.23477854425515898

Geo: 0.22626350310823068

| Term                            | Count | %     | PValue   |
|---------------------------------|-------|-------|----------|
| GO:0016477~cell migration       | 21    | 1.88% | 0.210149 |
| GO:0051674~localization of cell | 27    | 2.42% | 0.234779 |
| GO:0006928~cell motility        | 27    | 2.42% | 0.234779 |

Median: 0.213759410366611

Geo: 0.22973313871178894

| Term                                    | Count | %     | PValue   |
|-----------------------------------------|-------|-------|----------|
| GO:0006099~tricarboxylic acid cycle     | 4     | 0.36% | 0.155251 |
| GO:0046356~acetyl-CoA catabolic process | 4     | 0.36% | 0.16939  |
| GO:0006084~acetyl-CoA metabolic process | 5     | 0.45% | 0.193598 |
| GO:0009109~coenzyme catabolic process   | 4     | 0.36% | 0.213759 |
| GO:0009060~aerobic respiration          | 4     | 0.36% | 0.260231 |
| GO:0051187~cofactor catabolic process   | 4     | 0.36% | 0.307828 |
| GO:0045333~cellular respiration         | 4     | 0.36% | 0.387391 |

Median: 0.44053360278966125

Geo: 0.22979315384796073

| Term                                  | Count | %     | PValue   |
|---------------------------------------|-------|-------|----------|
| GO:0060090~molecular adaptor activity | 6     | 0.54% | 0.04997  |
| GO:0005070~SH3/SH2 adaptor activity   | 3     | 0.27% | 0.440534 |
| GO:0030674~protein binding, bridging  | 5     | 0.45% | 0.551213 |

Median: 0.3185542039557815

Geo: 0.2348694799133672

| Term                                         | Count | %     | PValue   |
|----------------------------------------------|-------|-------|----------|
| GO:0045428~regulation of nitric oxide biosyn | 3     | 0.27% | 0.127677 |
| GO:0006809~nitric oxide biosynthetic proces: | 3     | 0.27% | 0.318554 |
| GO:0046209~nitric oxide metabolic process    | 3     | 0.27% | 0.318554 |

Median: 0.2640537134097305

Geo: 0.24588531886167345

| Term                                        | Count | %     | PValue   |
|---------------------------------------------|-------|-------|----------|
| GO:0016868~intramolecular transferase activ | 3     | 0.27% | 0.100971 |
| GO:0016866~intramolecular transferase activ | 4     | 0.36% | 0.182498 |
| GO:0016853~isomerase activity               | 9     | 0.81% | 0.345609 |
| Carbohydrate transport and metabolism       | 7     | 0.63% | 0.573973 |

Median: 0.21316646918908094

Geo: 0.24597617148673978

| Term                                         | Count | %     | PValue   |
|----------------------------------------------|-------|-------|----------|
| GO:0004468~lysine N-acetyltransferase activ  | 3     | 0.27% | 0.137908 |
| GO:0004402~histone acetyltransferase activi  | 3     | 0.27% | 0.137908 |
| GO:0016746~transferase activity, transferrin | 12    | 1.07% | 0.162026 |
| GO:0008415~acyltransferase activity          | 11    | 0.98% | 0.206846 |
| GO:0016747~transferase activity, transferrin | 11    | 0.98% | 0.213166 |
| GO:0016410~N-acyltransferase activity        | 5     | 0.45% | 0.244245 |

|                                         |   |       |          |
|-----------------------------------------|---|-------|----------|
| GO:0008080~N-acetyltransferase activity | 4 | 0.36% | 0.362031 |
| acyltransferase                         | 6 | 0.54% | 0.457428 |
| GO:0016407~acetyltransferase activity   | 4 | 0.36% | 0.599807 |

|                                             |                          |       |          |
|---------------------------------------------|--------------------------|-------|----------|
| Median: 0.3846404082940681                  | Geo: 0.24846768359367194 |       |          |
| Term                                        | Count                    | %     | PValue   |
| GO:0006643~membrane lipid metabolic process | 14                       | 1.25% | 0.099218 |
| GO:0044255~cellular lipid metabolic process | 33                       | 2.95% | 0.38464  |
| GO:0006629~lipid metabolic process          | 39                       | 3.49% | 0.401942 |

|                                                    |                          |       |          |
|----------------------------------------------------|--------------------------|-------|----------|
| Median: 0.34773517538872534                        | Geo: 0.24956754803083364 |       |          |
| Term                                               | Count                    | %     | PValue   |
| rno04662:B cell receptor signaling pathway         | 9                        | 0.81% | 0.050096 |
| rno04360:Axon guidance                             | 11                       | 0.98% | 0.220624 |
| rno04650:Natural killer cell mediated cytotoxicity | 9                        | 0.81% | 0.288715 |
| rno04210:Apoptosis                                 | 7                        | 0.63% | 0.406755 |
| rno04660:T cell receptor signaling pathway         | 8                        | 0.72% | 0.42779  |
| rno04370:VEGF signaling pathway                    | 6                        | 0.54% | 0.435149 |

|                                                                     |                          |       |          |
|---------------------------------------------------------------------|--------------------------|-------|----------|
| Median: 0.32482771592771276                                         | Geo: 0.24979656724149604 |       |          |
| Term                                                                | Count                    | %     | PValue   |
| GO:0035258~steroid hormone receptor binding                         | 5                        | 0.45% | 0.025487 |
| GO:0003713~transcription coactivator activity                       | 14                       | 1.25% | 0.060449 |
| GO:0048518~positive regulation of biological process                | 70                       | 6.26% | 0.121497 |
| GO:0008134~transcription factor binding                             | 14                       | 1.25% | 0.123257 |
| GO:0008134~transcription factor binding                             | 26                       | 2.33% | 0.124756 |
| GO:0003712~transcription cofactor activity                          | 19                       | 1.70% | 0.14302  |
| GO:0009893~positive regulation of metabolic process                 | 28                       | 2.50% | 0.201809 |
| GO:0016563~transcription activator activity                         | 19                       | 1.70% | 0.273589 |
| GO:0031325~positive regulation of cellular metabolic process        | 24                       | 2.15% | 0.376066 |
| GO:0048522~positive regulation of cellular process                  | 58                       | 5.19% | 0.380492 |
| GO:0045935~positive regulation of nucleobase metabolic process      | 19                       | 1.70% | 0.487533 |
| GO:0045893~positive regulation of transcript metabolic process      | 15                       | 1.34% | 0.509516 |
| GO:0045941~positive regulation of transcript metabolic process      | 17                       | 1.52% | 0.607714 |
| GO:0045944~positive regulation of transcript metabolic process      | 10                       | 0.89% | 0.702208 |
| GO:0006357~regulation of transcription from RNA polymerase promoter | 23                       | 2.06% | 0.714292 |
| GO:0006366~transcription from RNA polymerase promoter               | 25                       | 2.24% | 0.933218 |

|                                                   |                         |       |          |
|---------------------------------------------------|-------------------------|-------|----------|
| Median: 0.261572969683048                         | Geo: 0.2505067926553862 |       |          |
| Term                                              | Count                   | %     | PValue   |
| GO:0005778~peroxisomal membrane                   | 4                       | 0.36% | 0.187301 |
| GO:0031903~microbody membrane                     | 4                       | 0.36% | 0.187301 |
| GO:0044439~peroxisomal part                       | 4                       | 0.36% | 0.261573 |
| GO:0044438~microbody part                         | 4                       | 0.36% | 0.261573 |
| GO:0005777~peroxisome                             | 7                       | 0.63% | 0.28454  |
| GO:0042579~microbody                              | 7                       | 0.63% | 0.28454  |
| GO:0007031~peroxisome organization and biogenesis | 3                       | 0.27% | 0.318554 |

|                                      |                          |
|--------------------------------------|--------------------------|
| Median: 0.18151085579993848          | Geo: 0.25534676871162876 |
| Term                                 | Count      %      PValue |
| GO:0015630~microtubule cytoskeleton  | 22    1.97%    0.125925  |
| GO:0007017~microtubule-based process | 16    1.43%    0.181511  |
| GO:0005874~microtubule               | 8     0.72%    0.728409  |

|                                                  |                          |
|--------------------------------------------------|--------------------------|
| Median: 0.36267773691844213                      | Geo: 0.25565972459880804 |
| Term                                             | Count      %      PValue |
| GO:0006643~membrane lipid metabolic process      | 14    1.25%    0.099218  |
| GO:0006644~phospholipid metabolic process        | 9     0.81%    0.362678  |
| GO:0006650~glycerophospholipid metabolic process | 5     0.45%    0.464381  |

|                                                                                                   |                          |
|---------------------------------------------------------------------------------------------------|--------------------------|
| Median: 0.25291158153882726                                                                       | Geo: 0.2570069622144935  |
| Term                                                                                              | Count      %      PValue |
| GO:0001565~phorbol ester receptor activity                                                        | 3     0.27%    0.137908  |
| IPR002219:Protein kinase C, phorbol ester/diazolobenzyl zinc finger region:Phorbol-ester/DAG-type | 5     0.45%    0.237707  |
| Phorbol-ester binding                                                                             | 3     0.27%    0.246277  |
| SM00109:C1                                                                                        | 4     0.36%    0.259546  |
| GO:0019992~diacylglycerol binding                                                                 | 5     0.45%    0.277455  |
|                                                                                                   | 3     0.27%    0.495685  |

|                                         |                          |
|-----------------------------------------|--------------------------|
| Median: 0.2646648643314025              | Geo: 0.257178985179388   |
| Term                                    | Count      %      PValue |
| GO:0031981~nuclear lumen                | 31    2.77%    0.137206  |
| GO:0043233~organelle lumen              | 38    3.40%    0.201213  |
| GO:0031974~membrane-enclosed lumen      | 38    3.40%    0.201213  |
| GO:0044428~nuclear part                 | 45    4.03%    0.264665  |
| GO:0005667~transcription factor complex | 13    1.16%    0.312198  |
| GO:0005654~nucleoplasm                  | 22    1.97%    0.320442  |
| GO:0044451~nucleoplasm part             | 17    1.52%    0.505927  |

|                                                    |                          |
|----------------------------------------------------|--------------------------|
| Median: 0.23201158734523689                        | Geo: 0.2583443959260503  |
| Term                                               | Count      %      PValue |
| GO:0006903~vesicle targeting                       | 3     0.27%    0.147649  |
| GO:0051650~establishment of vesicle localization   | 3     0.27%    0.210485  |
| GO:0051648~vesicle localization                    | 3     0.27%    0.232012  |
| GO:0051640~organelle localization                  | 4     0.36%    0.307828  |
| GO:0051656~establishment of organelle localization | 3     0.27%    0.518472  |

|                                       |                          |
|---------------------------------------|--------------------------|
| Median: 0.25368116831589566           | Geo: 0.25999331869230846 |
| Term                                  | Count      %      PValue |
| GO:0042745~circadian sleep/wake cycle | 3     0.27%    0.189177  |
| GO:0048512~circadian behavior         | 3     0.27%    0.210485  |
| GO:0030431~sleep                      | 3     0.27%    0.232012  |
| GO:0007622~rhythmic behavior          | 3     0.27%    0.275351  |
| GO:0048511~rhythmic process           | 9     0.81%    0.276768  |
| GO:0007623~circadian rhythm           | 5     0.45%    0.438703  |

Median: 0.43323106073215817

Geo: 0.26210156016547564

| Term                                        | Count | %     | PValue   |
|---------------------------------------------|-------|-------|----------|
| GO:0030031~cell projection biogenesis       | 8     | 0.72% | 0.018509 |
| GO:0048699~generation of neurons            | 27    | 2.42% | 0.093349 |
| GO:0022008~neurogenesis                     | 29    | 2.59% | 0.105274 |
| GO:0048858~cell projection morphogenesis    | 20    | 1.79% | 0.129073 |
| GO:0030030~cell projection organization and | 20    | 1.79% | 0.129073 |
| GO:0032990~cell part morphogenesis          | 20    | 1.79% | 0.129073 |
| GO:0030182~neuron differentiation           | 20    | 1.79% | 0.370018 |
| GO:0048666~neuron development               | 15    | 1.34% | 0.405516 |
| GO:0031175~neurite development              | 13    | 1.16% | 0.460946 |
| GO:0000902~cell morphogenesis               | 28    | 2.50% | 0.512472 |
| GO:0032989~cellular structure morphogenesis | 28    | 2.50% | 0.512472 |
| GO:0000904~cellular morphogenesis during c  | 12    | 1.07% | 0.520972 |
| GO:0048812~neurite morphogenesis            | 11    | 0.98% | 0.525559 |
| GO:0048667~neuron morphogenesis during c    | 11    | 0.98% | 0.525559 |
| GO:0009653~anatomical structure morphoge    | 59    | 5.28% | 0.618174 |
| GO:0007409~axonogenesis                     | 8     | 0.72% | 0.784897 |

Median: 0.2920008222498741

Geo: 0.27413750077368854

| Term                                        | Count | %     | PValue   |
|---------------------------------------------|-------|-------|----------|
| GO:0033014~tetrapyrrole biosynthetic proces | 3     | 0.27% | 0.168192 |
| GO:0006779~porphyrin biosynthetic process   | 3     | 0.27% | 0.168192 |
| GO:0051188~cofactor biosynthetic process    | 9     | 0.81% | 0.244059 |
| GO:0033013~tetrapyrrole metabolic process   | 3     | 0.27% | 0.339943 |
| GO:0006778~porphyrin metabolic process      | 3     | 0.27% | 0.339943 |
| GO:0046483~heterocycle metabolic process    | 7     | 0.63% | 0.531976 |

Median: 0.2589829024123425

Geo: 0.2748545576081132

| Term                                        | Count | %     | PValue   |
|---------------------------------------------|-------|-------|----------|
| GO:0009310~amine catabolic process          | 7     | 0.63% | 0.174917 |
| GO:0044270~nitrogen compound catabolic pr   | 7     | 0.63% | 0.192318 |
| binding site:Pyridoxal phosphate (covalent) | 4     | 0.36% | 0.258983 |
| GO:0009063~amino acid catabolic process     | 5     | 0.45% | 0.38641  |
| rno00252:Alanine and aspartate metabolism   | 3     | 0.27% | 0.465956 |

Median: 0.315135754469714

Geo: 0.27852397661412764

| Term                     | Count | %     | PValue   |
|--------------------------|-------|-------|----------|
| GO:0005773~vacuole       | 13    | 1.16% | 0.212609 |
| GO:0005764~lysosome      | 11    | 0.98% | 0.315136 |
| GO:0000323~lytic vacuole | 11    | 0.98% | 0.322484 |

Median: 0.3837679797429484

Geo: 0.28680725809930663

| Term                                     | Count | %     | PValue   |
|------------------------------------------|-------|-------|----------|
| GO:0001701~in utero embryonic developmer | 8     | 0.72% | 0.09846  |
| GO:0009790~embryonic development         | 21    | 1.88% | 0.308097 |
| GO:0043009~chordate embryonic developme  | 9     | 0.81% | 0.459439 |

GO:0009792~embryonic development ending 9 0.81% 0.485498

Median: 0.43870341527122014

Geo: 0.29161371042556156

| Term                                         | Count | %     | PValue   |
|----------------------------------------------|-------|-------|----------|
| GO:0051241~negative regulation of multicelli | 9     | 0.81% | 7.98E-04 |
| GO:0008016~regulation of heart contraction   | 5     | 0.45% | 0.281088 |
| GO:0003015~heart process                     | 5     | 0.45% | 0.373214 |
| GO:0060047~heart contraction                 | 5     | 0.45% | 0.373214 |
| GO:0035150~regulation of tube size           | 5     | 0.45% | 0.412681 |
| GO:0050880~regulation of blood vessel size   | 5     | 0.45% | 0.412681 |
| GO:0003018~vascular process in circulatory s | 5     | 0.45% | 0.438703 |
| GO:0008217~regulation of blood pressure      | 6     | 0.54% | 0.452147 |
| GO:0042311~vasodilation                      | 3     | 0.27% | 0.553633 |
| GO:0035295~tube development                  | 11    | 0.98% | 0.584276 |
| GO:0035239~tube morphogenesis                | 8     | 0.72% | 0.611771 |
| GO:0008015~blood circulation                 | 10    | 0.89% | 0.726533 |
| GO:0003013~circulatory system process        | 10    | 0.89% | 0.726533 |

Median: 0.2779018162955732

Geo: 0.29279001064309174

| Term                                        | Count | %     | PValue   |
|---------------------------------------------|-------|-------|----------|
| GO:0043284~biopolymer biosynthetic proces   | 7     | 0.63% | 0.134529 |
| GO:0033692~cellular polysaccharide biosyntf | 4     | 0.36% | 0.213759 |
| GO:0000271~polysaccharide biosynthetic pro  | 4     | 0.36% | 0.229067 |
| GO:0009250~glucan biosynthetic process      | 3     | 0.27% | 0.232012 |
| GO:0005978~glycogen biosynthetic process    | 3     | 0.27% | 0.232012 |
| GO:0005977~glycogen metabolic process       | 4     | 0.36% | 0.323792 |
| GO:0006073~glucan metabolic process         | 4     | 0.36% | 0.339757 |
| GO:0044264~cellular polysaccharide metabol  | 5     | 0.45% | 0.412681 |
| GO:0005976~polysaccharide metabolic proce   | 5     | 0.45% | 0.42573  |
| GO:0016051~carbohydrate biosynthetic proce  | 6     | 0.54% | 0.675549 |

Median: 0.2934854081935494

Geo: 0.2955976854979881

| Term                                       | Count | %     | PValue   |
|--------------------------------------------|-------|-------|----------|
| GO:0051093~negative regulation of developn | 9     | 0.81% | 0.136133 |
| GO:0050771~negative regulation of axonoge  | 3     | 0.27% | 0.147649 |
| GO:0050767~regulation of neurogenesis      | 6     | 0.54% | 0.225853 |
| GO:0050768~negative regulation of neuroger | 3     | 0.27% | 0.361117 |
| GO:0050770~regulation of axonogenesis      | 3     | 0.27% | 0.518472 |
| GO:0007409~axonogenesis                    | 8     | 0.72% | 0.784897 |

Median: 0.3419389271765082

Geo: 0.3125283750727572

| Term                                         | Count | %     | PValue   |
|----------------------------------------------|-------|-------|----------|
| isomerase                                    | 7     | 0.63% | 0.237841 |
| Rotamase                                     | 3     | 0.27% | 0.29287  |
| GO:0003755~peptidyl-prolyl cis-trans isomera | 3     | 0.27% | 0.341939 |
| GO:0016853~isomerase activity                | 9     | 0.81% | 0.345609 |
| GO:0016859~cis-trans isomerase activity      | 3     | 0.27% | 0.362203 |

Median: 0.3185542039557815

Geo: 0.3141499002215701

| Term                                       | Count | %     | PValue   |
|--------------------------------------------|-------|-------|----------|
| GO:0007043~intercellular junction assembly | 3     | 0.27% | 0.210485 |
| GO:0045216~intercellular junction assembly | 3     | 0.27% | 0.318554 |
| GO:0007028~cytoplasm organization and bio  | 3     | 0.27% | 0.462387 |

Median: 0.4768385859093126

Geo: 0.31852749595736973

| Term                                        | Count | %     | PValue   |
|---------------------------------------------|-------|-------|----------|
| GO:0006767~water-soluble vitamin metabolic  | 9     | 0.81% | 0.007896 |
| GO:0006769~nicotinamide metabolic process   | 5     | 0.45% | 0.089544 |
| GO:0006766~vitamin metabolic process        | 9     | 0.81% | 0.106836 |
| GO:0019362~pyridine nucleotide metabolic p  | 5     | 0.45% | 0.107637 |
| GO:0044262~cellular carbohydrate metabolic  | 26    | 2.33% | 0.11154  |
| GO:0006098~pentose-phosphate shunt          | 3     | 0.27% | 0.168192 |
| GO:0006066~alcohol metabolic process        | 23    | 2.06% | 0.243199 |
| GO:0006739~NADP metabolic process           | 3     | 0.27% | 0.253662 |
| rno00010:Glycolysis / Gluconeogenesis       | 5     | 0.45% | 0.360616 |
| GO:0005975~carbohydrate metabolic process   | 30    | 2.68% | 0.364572 |
| glycolysis                                  | 4     | 0.36% | 0.400613 |
| GO:0016616~oxidoreductase activity, acting  | 7     | 0.63% | 0.471222 |
| GO:0006007~glucose catabolic process        | 7     | 0.63% | 0.482455 |
| GO:0006006~glucose metabolic process        | 10    | 0.89% | 0.514797 |
| GO:0046365~monosaccharide catabolic process | 7     | 0.63% | 0.531976 |
| GO:0019320~hexose catabolic process         | 7     | 0.63% | 0.531976 |
| GO:0046164~alcohol catabolic process        | 7     | 0.63% | 0.56072  |
| GO:0019318~hexose metabolic process         | 11    | 0.98% | 0.659195 |
| GO:0005996~monosaccharide metabolic process | 11    | 0.98% | 0.67824  |
| binding site:Substrate                      | 6     | 0.54% | 0.716583 |
| GO:0050662~coenzyme binding                 | 9     | 0.81% | 0.750593 |
| GO:0044275~cellular carbohydrate catabolic  | 7     | 0.63% | 0.767266 |
| GO:0016052~carbohydrate catabolic process   | 7     | 0.63% | 0.813781 |
| GO:0006096~glycolysis                       | 4     | 0.36% | 0.861085 |

Median: 0.32733578102708194

Geo: 0.32861072017313064

| Term                                     | Count | %     | PValue   |
|------------------------------------------|-------|-------|----------|
| GO:0006821~chloride transport            | 6     | 0.54% | 0.16533  |
| GO:0031404~chloride ion binding          | 5     | 0.45% | 0.185787 |
| GO:0043168~anion binding                 | 5     | 0.45% | 0.197106 |
| GO:0008509~anion transmembrane transport | 10    | 0.89% | 0.276798 |
| GO:0015698~inorganic anion transport     | 11    | 0.98% | 0.294678 |
| GO:0006820~anion transport               | 13    | 1.16% | 0.327336 |
| GO:0005253~anion channel activity        | 5     | 0.45% | 0.331305 |
| chloride channel                         | 4     | 0.36% | 0.400613 |
| GO:0005254~chloride channel activity     | 4     | 0.36% | 0.480429 |
| chloride                                 | 4     | 0.36% | 0.501672 |
| GO:0022836~gated channel activity        | 11    | 0.98% | 0.933086 |

Median: 0.38303656691347576

Geo: 0.3286281289729965

| Term                                       | Count | %     | PValue   |
|--------------------------------------------|-------|-------|----------|
| GO:0019198~transmembrane receptor protei   | 3     | 0.27% | 0.177206 |
| GO:0004725~protein tyrosine phosphatase ac | 6     | 0.54% | 0.383037 |
| SM00194:PTPc                               | 4     | 0.36% | 0.522872 |

Median: 0.3137784044701102

Geo: 0.35567081697826736

| Term                                         | Count | %     | PValue   |
|----------------------------------------------|-------|-------|----------|
| GO:0016575~histone deacetylation             | 3     | 0.27% | 0.210485 |
| GO:0004407~histone deacetylase activity      | 3     | 0.27% | 0.259361 |
| GO:0033558~protein deacetylase activity      | 3     | 0.27% | 0.259361 |
| GO:0006476~protein amino acid deacetylatio   | 3     | 0.27% | 0.275351 |
| GO:0016811~hydrolase activity, acting on cai | 5     | 0.45% | 0.306082 |
| GO:0019213~deacetylase activity              | 3     | 0.27% | 0.321475 |
| GO:0016570~histone modification              | 4     | 0.36% | 0.464591 |
| GO:0016569~covalent chromatin modificator    | 4     | 0.36% | 0.479537 |
| GO:0016568~chromatin modification            | 7     | 0.63% | 0.570116 |
| GO:0016810~hydrolase activity, acting on cai | 6     | 0.54% | 0.664852 |

Median: 0.37687762029993876

Geo: 0.35655060468790495

| Term                                        | Count | %     | PValue   |
|---------------------------------------------|-------|-------|----------|
| GO:0031300~intrinsic to organelle membrane  | 9     | 0.81% | 0.177475 |
| GO:0031301~integral to organelle membrane   | 8     | 0.72% | 0.216569 |
| GO:0030173~integral to Golgi membrane       | 4     | 0.36% | 0.323272 |
| GO:0031228~intrinsic to Golgi membrane      | 4     | 0.36% | 0.430483 |
| GO:0030176~integral to endoplasmic reticulu | 3     | 0.27% | 0.570731 |
| GO:0031227~intrinsic to endoplasmic reticul | 3     | 0.27% | 0.673033 |

Median: 0.4075141240870743

Geo: 0.35866557898917073

| Term                                          | Count | %     | PValue   |
|-----------------------------------------------|-------|-------|----------|
| IPR000162:GPCR, family 3, metabotropic glut:  | 3     | 0.27% | 0.08858  |
| IPR001828:Extracellular ligand-binding recept | 5     | 0.45% | 0.310163 |
| IPR000337:GPCR, family 3                      | 4     | 0.36% | 0.354689 |
| IPR011500:GPCR, family 3, nine cysteines reg  | 3     | 0.27% | 0.46034  |
| GO:0008066~glutamate receptor activity        | 7     | 0.63% | 0.608926 |
| GO:0008067~metabotropic glutamate, GABA-      | 5     | 0.45% | 0.779334 |

Median: 0.3606164229489288

Geo: 0.36505968111636955

| Term                                     | Count | %     | PValue   |
|------------------------------------------|-------|-------|----------|
| rno05210:Colorectal cancer               | 9     | 0.81% | 0.144588 |
| rno05215:Prostate cancer                 | 9     | 0.81% | 0.20278  |
| rno05212:Pancreatic cancer               | 8     | 0.72% | 0.209256 |
| rno05219:Bladder cancer                  | 5     | 0.45% | 0.22194  |
| rno05213:Endometrial cancer              | 6     | 0.54% | 0.258366 |
| rno04664:Fc epsilon RI signaling pathway | 7     | 0.63% | 0.308233 |
| rno05214:Glioma                          | 6     | 0.54% | 0.35282  |
| rno04930:Type II diabetes mellitus       | 5     | 0.45% | 0.360616 |
| rno04910:Insulin signaling pathway       | 10    | 0.89% | 0.420725 |
| rno04012:ErbB signaling pathway          | 7     | 0.63% | 0.480269 |



|                                               |   |       |          |
|-----------------------------------------------|---|-------|----------|
| rno05221:Acute myeloid leukemia               | 5 | 0.45% | 0.499266 |
| rno05220:Chronic myeloid leukemia             | 6 | 0.54% | 0.601857 |
| rno05223:Non-small cell lung cancer           | 4 | 0.36% | 0.679289 |
| rno04620:Toll-like receptor signaling pathway | 6 | 0.54% | 0.689423 |
| rno05218:Melanoma                             | 5 | 0.45% | 0.694744 |

Median: 0.6107688362713029

Geo: 0.36786362508084713

| Term                                          | Count | %     | PValue   |
|-----------------------------------------------|-------|-------|----------|
| GO:0043412~biopolymer modification            | 104   | 9.30% | 0.010652 |
| GO:0006464~protein modification process       | 101   | 9.03% | 0.011152 |
| GO:0043687~post-translational protein modif   | 81    | 7.25% | 0.052405 |
| serine/threonine-specific protein kinase      | 6     | 0.54% | 0.054413 |
| GO:0006796~phosphate metabolic process        | 58    | 5.19% | 0.203992 |
| GO:0006793~phosphorus metabolic process       | 58    | 5.19% | 0.203992 |
| phosphotransferase                            | 9     | 0.81% | 0.270275 |
| IPR008271:Serine/threonine protein kinase, ac | 14    | 1.25% | 0.389865 |
| atp-binding                                   | 39    | 3.49% | 0.418874 |
| ATP                                           | 11    | 0.98% | 0.436506 |
| binding site:ATP                              | 15    | 1.34% | 0.467178 |
| GO:0016740~transferase activity               | 91    | 8.14% | 0.503766 |
| Serine/threonine-protein kinase               | 13    | 1.16% | 0.523432 |
| domain:Protein kinase                         | 13    | 1.16% | 0.606836 |
| IPR000719:Protein kinase, core                | 18    | 1.61% | 0.614701 |
| IPR002290:Serine/threonine protein kinase     | 9     | 0.81% | 0.665432 |
| GO:0016310~phosphorylation                    | 41    | 3.67% | 0.697755 |
| GO:0004713~protein-tyrosine kinase activity   | 15    | 1.34% | 0.727277 |
| GO:0004674~protein serine/threonine kinase    | 26    | 2.33% | 0.739647 |
| GO:0006468~protein amino acid phosphoryla     | 34    | 3.04% | 0.74446  |
| GO:0016301~kinase activity                    | 43    | 3.85% | 0.775186 |
| GO:0016772~transferase activity, transferrin  | 50    | 4.47% | 0.806929 |
| active site:Proton acceptor                   | 16    | 1.43% | 0.829169 |
| kinase                                        | 22    | 1.97% | 0.878988 |
| GO:0016773~phosphotransferase activity, alc   | 35    | 3.13% | 0.882313 |
| SM00220:S_TKc                                 | 16    | 1.43% | 0.886968 |
| nucleotide phosphate-binding region:ATP       | 15    | 1.34% | 0.911234 |
| GO:0004672~protein kinase activity            | 29    | 2.59% | 0.915438 |

Median: 0.36474197152379556

Geo: 0.3745507585387694

| Term                                          | Count | %     | PValue   |
|-----------------------------------------------|-------|-------|----------|
| domain:Helix-loop-helix motif                 | 6     | 0.54% | 0.103468 |
| SM00353:HLH                                   | 7     | 0.63% | 0.226373 |
| DNA-binding region:Basic motif                | 6     | 0.54% | 0.346947 |
| IPR001092:Basic helix-loop-helix dimerisation | 6     | 0.54% | 0.364742 |
| GO:0003705~RNA polymerase II transcription    | 3     | 0.27% | 0.440534 |
| IPR011598:Helix-loop-helix DNA-binding        | 3     | 0.27% | 0.803061 |
| GO:0003702~RNA polymerase II transcription    | 5     | 0.45% | 0.986203 |

Median: 0.40335407232030307

Geo: 0.3871980889214496

| Term                                       | Count | %     | PValue   |
|--------------------------------------------|-------|-------|----------|
| GO:0009719~response to endogenous stimuli  | 28    | 2.50% | 0.170654 |
| GO:0006974~response to DNA damage stimulus | 15    | 1.34% | 0.366557 |
| GO:0006281~DNA repair                      | 12    | 1.07% | 0.403354 |
| GO:0006260~DNA replication                 | 11    | 0.98% | 0.533056 |
| GO:0006259~DNA metabolic process           | 32    | 2.86% | 0.647067 |

Median: 0.3945131660035479

Geo: 0.39080685877127763

| Term                              | Count | %     | PValue   |
|-----------------------------------|-------|-------|----------|
| IPR013766:Thioredoxin domain      | 3     | 0.27% | 0.297638 |
| GO:0045454~cell redox homeostasis | 5     | 0.45% | 0.373214 |
| IPR006662:Thioredoxin-related     | 3     | 0.27% | 0.415812 |
| IPR012335:Thioredoxin fold        | 6     | 0.54% | 0.505016 |

Median: 0.577788008160159

Geo: 0.40749427993885956

| Term                                             | Count | %     | PValue   |
|--------------------------------------------------|-------|-------|----------|
| IPR001881:EGF-like calcium-binding               | 9     | 0.81% | 0.027665 |
| SM00179:EGF_CA                                   | 9     | 0.81% | 0.039536 |
| domain:EGF-like 1                                | 6     | 0.54% | 0.132888 |
| IPR000152:Aspartic acid and asparagine hydrolase | 7     | 0.63% | 0.164861 |
| IPR006209:EGF-like                               | 8     | 0.72% | 0.193811 |
| egf-like domain                                  | 11    | 0.98% | 0.205223 |
| IPR000742:EGF-like, type 3                       | 10    | 0.89% | 0.212821 |
| domain:EGF-like 3; calcium-binding               | 3     | 0.27% | 0.220383 |
| IPR013091:EGF calcium-binding                    | 5     | 0.45% | 0.251909 |
| IPR006210:EGF                                    | 10    | 0.89% | 0.254032 |
| SM00181:EGF                                      | 10    | 0.89% | 0.280013 |
| domain:EGF-like 2                                | 4     | 0.36% | 0.316111 |
| domain:EGF-like 2; calcium-binding               | 3     | 0.27% | 0.423992 |
| IPR013032:EGF-like region                        | 11    | 0.98% | 0.511755 |
| rno04610:Complement and coagulation cascade      | 5     | 0.45% | 0.528473 |
| serine proteinase                                | 3     | 0.27% | 0.627103 |
| GO:0007596~blood coagulation                     | 5     | 0.45% | 0.688275 |
| GO:0050817~coagulation                           | 5     | 0.45% | 0.697531 |
| GO:0007599~hemostasis                            | 5     | 0.45% | 0.724107 |
| active site:Charge relay system                  | 5     | 0.45% | 0.853922 |
| serine protease                                  | 5     | 0.45% | 0.860029 |
| domain:Peptidase S1                              | 3     | 0.27% | 0.864596 |
| IPR001314:Peptidase S1A, chymotrypsin            | 5     | 0.45% | 0.871184 |
| GO:0050878~regulation of body fluid levels       | 5     | 0.45% | 0.897558 |
| IPR001254:Peptidase S1 and S6, chymotrypsin      | 5     | 0.45% | 0.903363 |
| GO:0008236~serine-type peptidase activity        | 9     | 0.81% | 0.911622 |
| GO:0017171~serine hydrolase activity             | 9     | 0.81% | 0.911622 |
| SM00020:Tryp_SPC                                 | 5     | 0.45% | 0.912062 |
| GO:0004252~serine-type endopeptidase activity    | 7     | 0.63% | 0.957408 |
| protease                                         | 12    | 1.07% | 0.976645 |

Median: 0.40647718696843593

Geo: 0.41412682105793264

| Term                                      | Count | %     | PValue   |
|-------------------------------------------|-------|-------|----------|
| GO:0006323~DNA packaging                  | 16    | 1.43% | 0.206447 |
| IPR002164:Nucleosome assembly protein (NA | 3     | 0.27% | 0.273309 |
| GO:0006334~nucleosome assembly            | 6     | 0.54% | 0.31441  |
| GO:0006325~establishment and/or maintaina | 14    | 1.25% | 0.371224 |
| GO:0031497~chromatin assembly             | 6     | 0.54% | 0.406477 |
| GO:0000786~nucleosome                     | 4     | 0.36% | 0.489057 |
| GO:0065004~protein-DNA complex assembly   | 7     | 0.63% | 0.570116 |
| GO:0051276~chromosome organization and t  | 15    | 1.34% | 0.64874  |
| GO:0006333~chromatin assembly or disasser | 6     | 0.54% | 0.739903 |

Median: 0.532431042883997

Geo: 0.4177511484099943

| Term                                         | Count | %     | PValue   |
|----------------------------------------------|-------|-------|----------|
| GO:0046851~negative regulation of bone ren   | 4     | 0.36% | 0.059801 |
| GO:0030279~negative regulation of ossificati | 3     | 0.27% | 0.127677 |
| GO:0046850~regulation of bone remodeling     | 5     | 0.45% | 0.242656 |
| GO:0030278~regulation of ossification        | 4     | 0.36% | 0.323792 |
| GO:0048771~tissue remodeling                 | 11    | 0.98% | 0.51045  |
| GO:0030282~bone mineralization               | 3     | 0.27% | 0.518472 |
| GO:0046849~bone remodeling                   | 10    | 0.89% | 0.54639  |
| GO:0001503~ossification                      | 8     | 0.72% | 0.65935  |
| GO:0031214~biomineral formation              | 8     | 0.72% | 0.65935  |
| GO:0001649~osteoblast differentiation        | 3     | 0.27% | 0.84536  |
| GO:0001501~skeletal development              | 11    | 0.98% | 0.892239 |
| GO:0009888~tissue development                | 12    | 1.07% | 0.993113 |

Median: 0.4126814261238582

Geo: 0.42114604607328787

| Term                                         | Count | %     | PValue   |
|----------------------------------------------|-------|-------|----------|
| GO:0000245~spliceosome assembly              | 3     | 0.27% | 0.402649 |
| GO:0000377~RNA splicing, via transesterifica | 5     | 0.45% | 0.412681 |
| GO:0000398~nuclear mRNA splicing, via splic  | 5     | 0.45% | 0.412681 |
| GO:0000375~RNA splicing, via transesterifica | 5     | 0.45% | 0.412681 |
| GO:0008380~RNA splicing                      | 9     | 0.81% | 0.468157 |

Median: 0.46654621200982815

Geo: 0.42269776100474143

| Term                                        | Count | %     | PValue   |
|---------------------------------------------|-------|-------|----------|
| GO:0046058~cAMP metabolic process           | 4     | 0.36% | 0.229067 |
| GO:0006171~cAMP biosynthetic process        | 3     | 0.27% | 0.382033 |
| GO:0009187~cyclic nucleotide metabolic proc | 4     | 0.36% | 0.55106  |
| GO:0009190~cyclic nucleotide biosynthetic p | 3     | 0.27% | 0.662001 |

Median: 0.9529865236334002

Geo: 0.42284236028087474

| Term                                       | Count | %     | PValue   |
|--------------------------------------------|-------|-------|----------|
| GO:0007187~G-protein signaling, coupled to | 14    | 1.25% | 0.031366 |
| GO:0019932~second-messenger-mediated sig   | 24    | 2.15% | 0.049374 |
| GO:0019935~cyclic-nucleotide-mediated sign | 14    | 1.25% | 0.065869 |
| GO:0007188~G-protein signaling, coupled to | 11    | 0.98% | 0.066354 |
| G protein-coupled receptor                 | 11    | 0.98% | 0.068436 |

|                                              |    |       |          |
|----------------------------------------------|----|-------|----------|
| GO:0019933~cAMP-mediated signaling           | 11 | 0.98% | 0.127194 |
| GO:0008227~amine receptor activity           | 4  | 0.36% | 0.46613  |
| rno04080:Neuroactive ligand-receptor interac | 17 | 1.52% | 0.673005 |
| PIRSF002406:vertebrate rhodopsin             | 4  | 0.36% | 0.841308 |
| transducer                                   | 20 | 1.79% | 0.952739 |
| g-protein coupled receptor                   | 18 | 1.61% | 0.952987 |
| IPR000276:Rhodopsin-like GPCR superfamily    | 12 | 1.07% | 0.999899 |
| receptor                                     | 36 | 3.22% | 0.999976 |
| GO:0007166~cell surface receptor linked sigr | 76 | 6.80% | 1        |
| GO:0060089~molecular transducer activity     | 86 | 7.69% | 1        |
| GO:0004871~signal transducer activity        | 86 | 7.69% | 1        |
| GO:0007186~G-protein coupled receptor prot   | 44 | 3.94% | 1        |
| GO:0004872~receptor activity                 | 60 | 5.37% | 1        |
| GO:0004888~transmembrane receptor activit    | 38 | 3.40% | 1        |
| GO:0004930~G-protein coupled receptor acti   | 27 | 2.42% | 1        |
| GO:0001584~rhodopsin-like receptor activity  | 16 | 1.43% | 1        |

Median: 0.7093029113193254

Geo: 0.4274336816670745

| Term                                 | Count | %     | PValue   |
|--------------------------------------|-------|-------|----------|
| IPR013753:Ras                        | 9     | 0.81% | 0.152954 |
| IPR003579:Ras small GTPase, Rab type | 3     | 0.27% | 0.709303 |
| SM00175:RAB                          | 3     | 0.27% | 0.719805 |

Median: 0.3316371203131925

Geo: 0.43087329622529147

| Term                                    | Count | %     | PValue   |
|-----------------------------------------|-------|-------|----------|
| GO:0031226~intrinsic to plasma membrane | 57    | 5.10% | 0.258809 |
| GO:0044459~plasma membrane part         | 87    | 7.78% | 0.295558 |
| GO:0005887~integral to plasma membrane  | 55    | 4.92% | 0.325735 |
| GO:0005886~plasma membrane              | 106   | 9.48% | 0.337539 |
| topological domain:Cytoplasmic          | 69    | 6.17% | 0.764369 |
| topological domain:Extracellular        | 43    | 3.85% | 0.99537  |

Median: 0.44945922077534506

Geo: 0.43464513235413105

| Term                                       | Count | %     | PValue   |
|--------------------------------------------|-------|-------|----------|
| GO:0051094~positive regulation of developm | 8     | 0.72% | 0.319107 |
| GO:0048871~multicellular organismal homeo  | 4     | 0.36% | 0.449459 |
| GO:0001894~tissue homeostasis              | 4     | 0.36% | 0.449459 |
| GO:0045453~bone resorption                 | 3     | 0.27% | 0.553633 |

Median: 0.685960066589173

Geo: 0.4362470704578489

| Term                                       | Count | %     | PValue   |
|--------------------------------------------|-------|-------|----------|
| GO:0018193~peptidyl-amino acid modificatio | 10    | 0.89% | 0.171207 |
| GO:0018108~peptidyl-tyrosine phosphorylati | 4     | 0.36% | 0.68596  |
| GO:0018212~peptidyl-tyrosine modification  | 4     | 0.36% | 0.706929 |

Median: 0.40963610445819626

Geo: 0.44729887337555274

| Term     | Count | %     | PValue   |
|----------|-------|-------|----------|
| repeat:2 | 6     | 0.54% | 0.388537 |

|          |   |       |          |
|----------|---|-------|----------|
| repeat:1 | 6 | 0.54% | 0.388537 |
| repeat:3 | 5 | 0.45% | 0.430735 |
| repeat:4 | 4 | 0.36% | 0.615625 |

|                                         |                         |       |          |
|-----------------------------------------|-------------------------|-------|----------|
| Median: 0.4774561483027405              | Geo: 0.4484195189382892 |       |          |
| Term                                    | Count                   | %     | PValue   |
| GO:0005739~mitochondrion                | 48                      | 4.29% | 0.270112 |
| GO:0031966~mitochondrial membrane       | 17                      | 1.52% | 0.338256 |
| GO:0019866~organelle inner membrane     | 15                      | 1.34% | 0.439673 |
| GO:0005743~mitochondrial inner membrane | 14                      | 1.25% | 0.470146 |
| GO:0005740~mitochondrial envelope       | 17                      | 1.52% | 0.484766 |
| GO:0031967~organelle envelope           | 23                      | 2.06% | 0.556712 |
| GO:0031975~envelope                     | 23                      | 2.06% | 0.556712 |
| GO:0044429~mitochondrial part           | 20                      | 1.79% | 0.576142 |

|                               |                         |       |          |
|-------------------------------|-------------------------|-------|----------|
| Median: 0.4293023416983348    | Geo: 0.4612341902779416 |       |          |
| Term                          | Count                   | %     | PValue   |
| GO:0015629~actin cytoskeleton | 15                      | 1.34% | 0.308413 |
| GO:0016459~myosin complex     | 5                       | 0.45% | 0.429302 |
| GO:0003774~motor activity     | 8                       | 0.72% | 0.741087 |

|                                             |                          |       |          |
|---------------------------------------------|--------------------------|-------|----------|
| Median: 0.48151244734237886                 | Geo: 0.47505105782779394 |       |          |
| Term                                        | Count                    | %     | PValue   |
| GO:0007368~determination of left/right symm | 3                        | 0.27% | 0.462387 |
| GO:0009855~determination of bilateral symm  | 3                        | 0.27% | 0.481512 |
| GO:0009799~determination of symmetry        | 3                        | 0.27% | 0.481512 |

|                                             |                         |       |          |
|---------------------------------------------|-------------------------|-------|----------|
| Median: 0.4460592396549603                  | Geo: 0.4885246371145563 |       |          |
| Term                                        | Count                   | %     | PValue   |
| GO:0015291~secondary active transmembran    | 13                      | 1.16% | 0.32978  |
| GO:0015293~symporter activity               | 9                       | 0.81% | 0.421411 |
| GO:0022804~active transmembrane transpor    | 22                      | 1.97% | 0.446059 |
| GO:0015294~solute:cation symporter activity | 5                       | 0.45% | 0.584325 |
| GO:0015370~solute:sodium symporter activit  | 3                       | 0.27% | 0.768165 |

|                                             |                         |       |          |
|---------------------------------------------|-------------------------|-------|----------|
| Median: 0.5088209052108131                  | Geo: 0.4962598576338997 |       |          |
| Term                                        | Count                   | %     | PValue   |
| GO:0042733~embryonic digit morphogenesis    | 3                       | 0.27% | 0.127677 |
| GO:0030326~embryonic limb morphogenesis     | 4                       | 0.36% | 0.494285 |
| GO:0035113~embryonic appendage morphog      | 4                       | 0.36% | 0.494285 |
| GO:0035108~limb morphogenesis               | 4                       | 0.36% | 0.508821 |
| GO:0035107~appendage morphogenesis          | 4                       | 0.36% | 0.508821 |
| GO:0048736~appendage development            | 4                       | 0.36% | 0.508821 |
| GO:0060173~limb development                 | 4                       | 0.36% | 0.508821 |
| GO:0007389~pattern specification process    | 10                      | 0.89% | 0.54639  |
| GO:0009952~anterior/posterior pattern forma | 5                       | 0.45% | 0.58499  |
| GO:0003002~regionalization                  | 6                       | 0.54% | 0.754437 |
| GO:0048598~embryonic morphogenesis          | 6                       | 0.54% | 0.89166  |

Median: 0.6014490269812658                      Geo: 0.4973764616269408

| Term                                        | Count | %     | PValue   |
|---------------------------------------------|-------|-------|----------|
| GO:0046466~membrane lipid catabolic proce   | 3     | 0.27% | 0.297004 |
| GO:0016042~lipid catabolic process          | 6     | 0.54% | 0.601449 |
| GO:0044242~cellular lipid catabolic process | 3     | 0.27% | 0.688803 |

Median: 0.8277224214823803                      Geo: 0.5022243656471842

| Term                              | Count | %     | PValue   |
|-----------------------------------|-------|-------|----------|
| propeptide:Removed in mature form | 9     | 0.81% | 0.175615 |
| GO:0048503~GPI anchor binding     | 3     | 0.27% | 0.827722 |
| gpi-anchor                        | 3     | 0.27% | 0.87146  |

Median: 0.7482201941461548                      Geo: 0.5043113219971841

| Term                    | Count | %     | PValue   |
|-------------------------|-------|-------|----------|
| IPR013089:Kelch related | 3     | 0.27% | 0.176793 |
| IPR013069:BTB/POZ       | 4     | 0.36% | 0.390294 |
| IPR011333:BTB/POZ fold  | 4     | 0.36% | 0.74822  |
| IPR000210:BTB/POZ-like  | 4     | 0.36% | 0.767953 |
| SM00225:BTB             | 4     | 0.36% | 0.82276  |

Median: 0.6629167877214965                      Geo: 0.5180844925108304

| Term                                       | Count | %     | PValue   |
|--------------------------------------------|-------|-------|----------|
| GO:0016891~endoribonuclease activity, prod | 3     | 0.27% | 0.280132 |
| GO:0016893~endonuclease activity, active w | 3     | 0.27% | 0.300856 |
| GO:0004519~endonuclease activity           | 5     | 0.45% | 0.636226 |
| GO:0004540~ribonuclease activity           | 4     | 0.36% | 0.689608 |
| GO:0004521~endoribonuclease activity       | 3     | 0.27% | 0.715294 |
| GO:0004518~nuclease activity               | 7     | 0.63% | 0.731114 |

Median: 0.5088209052108131                      Geo: 0.5218217098726277

| Term                                      | Count | %     | PValue   |
|-------------------------------------------|-------|-------|----------|
| GO:0042552~myelination                    | 4     | 0.36% | 0.464591 |
| GO:0007272~ensheathment of neurons        | 4     | 0.36% | 0.508821 |
| GO:0008366~axon ensheathment              | 4     | 0.36% | 0.508821 |
| GO:0001508~regulation of action potential | 4     | 0.36% | 0.616436 |

Median: 0.5849051118463864                      Geo: 0.5232757559198661

| Term                                          | Count | %     | PValue   |
|-----------------------------------------------|-------|-------|----------|
| IPR013087:Zinc finger, C2H2-type/integrase, I | 8     | 0.72% | 0.332645 |
| IPR015880:Zinc finger, C2H2-like              | 9     | 0.81% | 0.543597 |
| SM00355:ZnF_C2H2                              | 9     | 0.81% | 0.584905 |
| IPR007087:Zinc finger, C2H2-type              | 12    | 1.07% | 0.585557 |
| IPR001909:KRAB box                            | 3     | 0.27% | 0.633491 |

Median: 0.6445007927650344                      Geo: 0.5232873981612741

| Term                                    | Count | %     | PValue   |
|-----------------------------------------|-------|-------|----------|
| GO:0009401~phosphoenolpyruvate-depender | 3     | 0.27% | 0.189177 |

|                                           |   |       |          |
|-------------------------------------------|---|-------|----------|
| GO:0015293~symporter activity             | 9 | 0.81% | 0.421411 |
| GO:0005351~sugar:hydrogen ion symporter a | 3 | 0.27% | 0.610061 |
| GO:0051119~sugar transmembrane transport  | 3 | 0.27% | 0.67894  |
| GO:0015144~carbohydrate transmembrane t   | 3 | 0.27% | 0.748128 |
| GO:0008643~carbohydrate transport         | 4 | 0.36% | 0.831163 |

Median: 0.5536331420138444

Geo: 0.5271280856259419

| Term                                       | Count | %     | PValue   |
|--------------------------------------------|-------|-------|----------|
| GO:0000096~sulfur amino acid metabolic pro | 3     | 0.27% | 0.297004 |
| GO:0044272~sulfur compound biosynthetic p  | 3     | 0.27% | 0.553633 |
| GO:0006790~sulfur metabolic process        | 4     | 0.36% | 0.890767 |

Median: 0.601409864525576

Geo: 0.5314855310753033

| Term                                        | Count | %     | PValue   |
|---------------------------------------------|-------|-------|----------|
| GO:0051174~regulation of phosphorus metabol | 6     | 0.54% | 0.383436 |
| GO:0019220~regulation of phosphate metabo   | 6     | 0.54% | 0.383436 |
| GO:0042325~regulation of phosphorylation    | 5     | 0.45% | 0.562107 |
| GO:0001932~regulation of protein amino acid | 4     | 0.36% | 0.640713 |
| GO:0033238~regulation of amine metabolic p  | 4     | 0.36% | 0.652439 |
| GO:0006521~regulation of amino acid metabo  | 4     | 0.36% | 0.652439 |

Median: 0.6966402340618993

Geo: 0.5381382996526384

| Term                                         | Count | %     | PValue   |
|----------------------------------------------|-------|-------|----------|
| GO:0050869~negative regulation of B cell act | 3     | 0.27% | 0.072716 |
| GO:0051250~negative regulation of lymphocy   | 3     | 0.27% | 0.382033 |
| GO:0002521~leukocyte differentiation         | 8     | 0.72% | 0.385125 |
| GO:0050864~regulation of B cell activation   | 3     | 0.27% | 0.442854 |
| GO:0030183~B cell differentiation            | 3     | 0.27% | 0.536282 |
| GO:0051249~regulation of lymphocyte activa   | 5     | 0.45% | 0.538554 |
| GO:0050865~regulation of cell activation     | 5     | 0.45% | 0.562107 |
| GO:0042113~B cell activation                 | 4     | 0.36% | 0.628711 |
| GO:0045321~leukocyte activation              | 11    | 0.98% | 0.69664  |
| GO:0050670~regulation of lymphocyte prolif   | 3     | 0.27% | 0.701535 |
| GO:0032944~regulation of mononuclear cell p  | 3     | 0.27% | 0.701535 |
| GO:0032943~mononuclear cell proliferation    | 4     | 0.36% | 0.706929 |
| GO:0046651~lymphocyte proliferation          | 4     | 0.36% | 0.706929 |
| GO:0051251~positive regulation of lymphocy   | 3     | 0.27% | 0.713831 |
| GO:0001775~cell activation                   | 12    | 1.07% | 0.731025 |
| GO:0046649~lymphocyte activation             | 8     | 0.72% | 0.773536 |
| GO:0030098~lymphocyte differentiation        | 4     | 0.36% | 0.795871 |

Median: 0.5464358420691726

Geo: 0.5464881667450793

| Term                | Count | %     | PValue   |
|---------------------|-------|-------|----------|
| repeat:LRR 4        | 4     | 0.36% | 0.296977 |
| repeat:LRR 3        | 4     | 0.36% | 0.37346  |
| repeat:LRR 2        | 4     | 0.36% | 0.411215 |
| repeat:LRR 1        | 4     | 0.36% | 0.411215 |
| leucine-rich repeat | 6     | 0.54% | 0.681657 |

|                                               |   |       |          |
|-----------------------------------------------|---|-------|----------|
| IPR001611:Leucine-rich repeat                 | 6 | 0.54% | 0.823577 |
| IPR003591:Leucine-rich repeat, typical subtyp | 3 | 0.27% | 0.862004 |
| SM00369:LRR_TYP                               | 3 | 0.27% | 0.876519 |

|                                           |                         |       |          |
|-------------------------------------------|-------------------------|-------|----------|
| Median: 0.5819051364898118                | Geo: 0.5596950020270177 |       |          |
| Term                                      | Count                   | %     | PValue   |
| GO:0048646~anatomical structure formation | 12                      | 1.07% | 0.301312 |
| GO:0048514~blood vessel morphogenesis     | 10                      | 0.89% | 0.54639  |
| GO:0001568~blood vessel development       | 11                      | 0.98% | 0.577108 |
| GO:0001525~angiogenesis                   | 8                       | 0.72% | 0.586703 |
| GO:0001944~vasculature development        | 11                      | 0.98% | 0.605447 |
| GO:0009887~organ morphogenesis            | 19                      | 1.70% | 0.910833 |

|                                               |                         |       |          |
|-----------------------------------------------|-------------------------|-------|----------|
| Median: 0.7146631166959486                    | Geo: 0.5600330435588263 |       |          |
| Term                                          | Count                   | %     | PValue   |
| GO:0007626~locomotory behavior                | 13                      | 1.16% | 0.260627 |
| rno04620:Toll-like receptor signaling pathway | 6                       | 0.54% | 0.689423 |
| GO:0042330~taxis                              | 6                       | 0.54% | 0.739903 |
| GO:0006935~chemotaxis                         | 6                       | 0.54% | 0.739903 |

|                                                              |                         |       |          |
|--------------------------------------------------------------|-------------------------|-------|----------|
| Median: 0.595986061875998                                    | Geo: 0.5617526454231732 |       |          |
| Term                                                         | Count                   | %     | PValue   |
| rno01040:Polyunsaturated fatty acid biosynth lipid synthesis | 3                       | 0.27% | 0.319739 |
| lipid synthesis                                              | 5                       | 0.45% | 0.462802 |
| fatty acid biosynthesis                                      | 3                       | 0.27% | 0.516909 |
| GO:0006633~fatty acid biosynthetic process                   | 4                       | 0.36% | 0.675063 |
| GO:0046394~carboxylic acid biosynthetic pro                  | 4                       | 0.36% | 0.780118 |
| GO:0016053~organic acid biosynthetic proce:                  | 4                       | 0.36% | 0.780118 |

|                                      |                         |       |          |
|--------------------------------------|-------------------------|-------|----------|
| Median: 0.6014490269812658           | Geo: 0.5625121080973473 |       |          |
| Term                                 | Count                   | %     | PValue   |
| GO:0004623~phospholipase A2 activity | 3                       | 0.27% | 0.42142  |
| GO:0004091~carboxylesterase activity | 7                       | 0.63% | 0.42217  |
| GO:0016042~lipid catabolic process   | 6                       | 0.54% | 0.601449 |
| GO:0004620~phospholipase activity    | 4                       | 0.36% | 0.668674 |
| GO:0016298~lipase activity           | 4                       | 0.36% | 0.787124 |

|                                              |                         |       |          |
|----------------------------------------------|-------------------------|-------|----------|
| Median: 0.5787287488791943                   | Geo: 0.5668905827307934 |       |          |
| Term                                         | Count                   | %     | PValue   |
| GO:0051128~regulation of cellular componen   | 6                       | 0.54% | 0.33732  |
| GO:0008064~regulation of actin polymerizati  | 3                       | 0.27% | 0.536282 |
| GO:0030832~regulation of actin filament leng | 3                       | 0.27% | 0.553633 |
| GO:0032535~regulation of cellular componen   | 3                       | 0.27% | 0.57052  |
| GO:0032956~regulation of actin cytoskeleton  | 3                       | 0.27% | 0.586938 |
| GO:0051493~regulation of cytoskeleton organ  | 3                       | 0.27% | 0.662001 |
| GO:0033043~regulation of organelle organiza  | 3                       | 0.27% | 0.662001 |
| GO:0008154~actin polymerization and/or dep   | 3                       | 0.27% | 0.7257   |



| Median: 0.5999486537353009                   | Geo: 0.5669168044626316 |       |          |
|----------------------------------------------|-------------------------|-------|----------|
| Term                                         | Count                   | %     | PValue   |
| GO:0043123~positive regulation of I-kappaB I | 6                       | 0.54% | 0.394966 |
| GO:0043122~regulation of I-kappaB kinase/N   | 6                       | 0.54% | 0.452147 |
| GO:0007249~I-kappaB kinase/NF-kappaB cas     | 7                       | 0.63% | 0.74775  |
| GO:0009967~positive regulation of signal tra | 8                       | 0.72% | 0.773536 |

| Median: 1.0                                 | Geo: 0.5670533146296532 |       |          |
|---------------------------------------------|-------------------------|-------|----------|
| Term                                        | Count                   | %     | PValue   |
| GO:0009582~detection of abiotic stimulus    | 5                       | 0.45% | 0.170357 |
| GO:0009581~detection of external stimulus   | 5                       | 0.45% | 0.26816  |
| GO:0050954~sensory perception of mechanic   | 5                       | 0.45% | 0.412681 |
| GO:0007608~sensory perception of smell      | 5                       | 0.45% | 1        |
| GO:0007606~sensory perception of chemical   | 6                       | 0.54% | 1        |
| GO:0050906~detection of stimulus during ser | 5                       | 0.45% | 1        |
| GO:0051606~detection of stimulus            | 7                       | 0.63% | 1        |

| Median: 0.609218857807939                    | Geo: 0.5802975779525337 |       |          |
|----------------------------------------------|-------------------------|-------|----------|
| Term                                         | Count                   | %     | PValue   |
| GO:0009890~negative regulation of biosynthe  | 4                       | 0.36% | 0.434156 |
| GO:0017148~negative regulation of translati  | 3                       | 0.27% | 0.57052  |
| GO:0031327~negative regulation of cellular b | 3                       | 0.27% | 0.647918 |
| GO:0051248~negative regulation of protein n  | 5                       | 0.45% | 0.706588 |

| Median: 0.6213308430829785               | Geo: 0.6021493472760941 |       |          |
|------------------------------------------|-------------------------|-------|----------|
| Term                                     | Count                   | %     | PValue   |
| IPR001440:Tetratricopeptide TPR-1        | 4                       | 0.36% | 0.509556 |
| IPR011990:Tetratricopeptide-like helical | 5                       | 0.45% | 0.592901 |
| TPR repeat                               | 4                       | 0.36% | 0.621331 |
| IPR013026:Tetratricopeptide region       | 4                       | 0.36% | 0.642694 |
| SM00028:TPR                              | 4                       | 0.36% | 0.656174 |

| Median: 0.6928277524443143                  | Geo: 0.6074386132124397 |       |          |
|---------------------------------------------|-------------------------|-------|----------|
| Term                                        | Count                   | %     | PValue   |
| GO:0055086~nucleobase, nucleoside and nuc   | 21                      | 1.88% | 0.079074 |
| GO:0009117~nucleotide metabolic process     | 19                      | 1.70% | 0.109776 |
| GO:0015992~proton transport                 | 7                       | 0.63% | 0.358964 |
| GO:0006163~purine nucleotide metabolic pro  | 8                       | 0.72% | 0.394626 |
| GO:0006818~hydrogen transport               | 7                       | 0.63% | 0.421131 |
| hydrogen ion transport                      | 4                       | 0.36% | 0.435119 |
| GO:0009144~purine nucleoside triphosphate   | 6                       | 0.54% | 0.46343  |
| GO:0009165~nucleotide biosynthetic process  | 10                      | 0.89% | 0.498742 |
| GO:0009141~nucleoside triphosphate metabo   | 6                       | 0.54% | 0.507789 |
| GO:0006164~purine nucleotide biosynthetic p | 6                       | 0.54% | 0.540067 |
| GO:0015077~monovalent inorganic cation tra  | 8                       | 0.72% | 0.566816 |
| GO:0009108~coenzyme biosynthetic process    | 6                       | 0.54% | 0.601449 |
| GO:0009199~ribonucleoside triphosphate me   | 5                       | 0.45% | 0.6286   |
| GO:0009205~purine ribonucleoside triphosph  | 5                       | 0.45% | 0.6286   |

|                                              |    |       |          |
|----------------------------------------------|----|-------|----------|
| GO:0016469~proton-transporting two-sector    | 4  | 0.36% | 0.632594 |
| GO:0009150~purine ribonucleotide metabolic   | 6  | 0.54% | 0.639677 |
| GO:0022890~inorganic cation transmembran     | 10 | 0.89% | 0.64058  |
| GO:0009152~purine ribonucleotide biosynthe   | 5  | 0.45% | 0.669169 |
| GO:0009201~ribonucleoside triphosphate bio   | 4  | 0.36% | 0.68596  |
| GO:0009206~purine ribonucleoside triphosph   | 4  | 0.36% | 0.68596  |
| GO:0009145~purine nucleoside triphosphate    | 4  | 0.36% | 0.68596  |
| GO:0015662~ATPase activity, coupled to tran  | 4  | 0.36% | 0.699695 |
| GO:0009259~ribonucleotide metabolic proces   | 6  | 0.54% | 0.700848 |
| GO:0009142~nucleoside triphosphate biosynt   | 4  | 0.36% | 0.706929 |
| GO:0009260~ribonucleotide biosynthetic proc  | 5  | 0.45% | 0.715446 |
| GO:0046034~ATP metabolic process             | 4  | 0.36% | 0.717004 |
| GO:0015405~P-P-bond-hydrolysis-driven tran:  | 9  | 0.81% | 0.733388 |
| GO:0015399~primary active transmembrane      | 9  | 0.81% | 0.733388 |
| GO:0046961~hydrogen ion transporting ATPa    | 3  | 0.27% | 0.737562 |
| GO:0015986~ATP synthesis coupled proton tr   | 3  | 0.27% | 0.748188 |
| GO:0043492~ATPase activity, coupled to mov   | 8  | 0.72% | 0.775888 |
| GO:0006753~nucleoside phosphate metaboli     | 3  | 0.27% | 0.788436 |
| GO:0006754~ATP biosynthetic process          | 3  | 0.27% | 0.788436 |
| GO:0015078~hydrogen ion transmembrane ti     | 6  | 0.54% | 0.788459 |
| GO:0042625~ATPase activity, coupled to tran  | 5  | 0.45% | 0.805609 |
| GO:0019829~cation-transporting ATPase acti   | 3  | 0.27% | 0.848745 |
| GO:0042626~ATPase activity, coupled to tran  | 7  | 0.63% | 0.871155 |
| GO:0006119~oxidative phosphorylation         | 4  | 0.36% | 0.876716 |
| GO:0016820~hydrolase activity, acting on aci | 7  | 0.63% | 0.888939 |
| GO:0042623~ATPase activity, coupled          | 12 | 1.07% | 0.897126 |
| rno00190:Oxidative phosphorylation           | 5  | 0.45% | 0.941111 |
| GO:0016887~ATPase activity                   | 13 | 1.16% | 0.952816 |

Median: 0.7013168766235801

Geo: 0.6297977628010818

| Term                                        | Count | %     | PValue   |
|---------------------------------------------|-------|-------|----------|
| GO:0048511~rhythmic process                 | 9     | 0.81% | 0.276768 |
| GO:0001541~ovarian follicle development     | 3     | 0.27% | 0.402649 |
| GO:0048608~reproductive structure developr  | 5     | 0.45% | 0.502071 |
| GO:0008406~gonad development                | 5     | 0.45% | 0.502071 |
| GO:0045137~development of primary sexual    | 5     | 0.45% | 0.596168 |
| GO:0022601~menstrual cycle phase            | 3     | 0.27% | 0.662001 |
| GO:0022602~menstrual cycle process          | 3     | 0.27% | 0.675627 |
| GO:0008585~female gonad development         | 3     | 0.27% | 0.688803 |
| GO:0046660~female sex differentiation       | 3     | 0.27% | 0.713831 |
| GO:0046545~development of primary female    | 3     | 0.27% | 0.713831 |
| GO:0042698~menstrual cycle                  | 3     | 0.27% | 0.7257   |
| GO:0007548~sex differentiation              | 5     | 0.45% | 0.756788 |
| GO:0003006~reproductive developmental prc   | 5     | 0.45% | 0.786396 |
| GO:0032504~multicellular organism reproduc  | 4     | 0.36% | 0.803388 |
| GO:0048609~reproductive process in a multix | 4     | 0.36% | 0.803388 |
| GO:0022414~reproductive process             | 13    | 1.16% | 0.835992 |

|                                   |                          |
|-----------------------------------|--------------------------|
| Median: 0.5984469718441101        | Geo: 0.6323830465290332  |
| Term                              | Count      %      PValue |
| GO:0007276~gamete generation      | 15    1.34%    0.566156  |
| GO:0048232~male gamete generation | 11    0.98%    0.598447  |
| GO:0007283~spermatogenesis        | 11    0.98%    0.598447  |
| GO:0019953~sexual reproduction    | 17    1.52%    0.624193  |
| GO:0000003~reproduction           | 25    2.24%    0.799089  |

|                                         |                          |
|-----------------------------------------|--------------------------|
| Median: 0.6418794153582141              | Geo: 0.6434810458513377  |
| Term                                    | Count      %      PValue |
| domain:C2 2                             | 3    0.27%    0.557944   |
| domain:C2 1                             | 3    0.27%    0.557944   |
| IPR000008:C2 calcium-dependent membrane | 5    0.45%    0.725815   |
| SM00239:C2                              | 5    0.45%    0.758815   |

|                                              |                          |
|----------------------------------------------|--------------------------|
| Median: 0.5705196311967391                   | Geo: 0.6563294464415198  |
| Term                                         | Count      %      PValue |
| GO:0040014~regulation of multicellular organ | 3    0.27%    0.536282   |
| GO:0035264~multicellular organism growth     | 3    0.27%    0.57052    |
| GO:0040008~regulation of growth              | 7    0.63%    0.924063   |

|                             |                          |
|-----------------------------|--------------------------|
| Median: 0.7446078402660412  | Geo: 0.6575850095074384  |
| Term                        | Count      %      PValue |
| GO:0000785~chromatin        | 10    0.89%    0.502927  |
| GO:0005694~chromosome       | 15    1.34%    0.744608  |
| GO:0044427~chromosomal part | 13    1.16%    0.759317  |

|                                                      |                          |
|------------------------------------------------------|--------------------------|
| Median: 0.5620393231910041                           | Geo: 0.6810252212277741  |
| Term                                                 | Count      %      PValue |
| GO:0001608~nucleotide receptor activity, G- $\gamma$ | 4    0.36%    0.562039   |
| GO:0016502~nucleotide receptor activity              | 4    0.36%    0.562039   |
| IPR000276:Rhodopsin-like GPCR superfamily            | 12    1.07%    0.999899  |

|                                     |                          |
|-------------------------------------|--------------------------|
| Median: 0.6427726332095793          | Geo: 0.7001764684951715  |
| Term                                | Count      %      PValue |
| IPR002126: Cadherin                 | 4    0.36%    0.61543    |
| SM00112:CA                          | 4    0.36%    0.642773   |
| GO:0007156~homophilic cell adhesion | 6    0.54%    0.867733   |

|                                               |                          |
|-----------------------------------------------|--------------------------|
| Median: 0.793690309997469                     | Geo: 0.7071541215403462  |
| Term                                          | Count      %      PValue |
| GO:0045860~positive regulation of protein kin | 9    0.81%    0.459439   |
| GO:0043405~regulation of MAP kinase activit   | 5    0.45%    0.764474   |
| GO:0000187~activation of MAPK activity        | 3    0.27%    0.822907   |
| GO:0043406~positive regulation of MAP kinas   | 3    0.27%    0.865197   |

|                           |                          |
|---------------------------|--------------------------|
| Median: 0.779359351302318 | Geo: 0.708304923911514   |
| Term                      | Count      %      PValue |

|                                          |    |       |          |
|------------------------------------------|----|-------|----------|
| GO:0009605~response to external stimulus | 42 | 3.76% | 0.465649 |
| GO:0006954~inflammatory response         | 17 | 1.52% | 0.676617 |
| GO:0009611~response to wounding          | 23 | 2.06% | 0.882102 |
| GO:0006952~defense response              | 22 | 1.97% | 0.905651 |

Median: 0.8552131779570957

Geo: 0.7091622268294516

| Term                                        | Count | %     | PValue   |
|---------------------------------------------|-------|-------|----------|
| GO:0022892~substrate-specific transporter a | 65    | 5.81% | 0.10346  |
| GO:0005215~transporter activity             | 81    | 7.25% | 0.112579 |
| GO:0022891~substrate-specific transmembra   | 48    | 4.29% | 0.401987 |
| GO:0022857~transmembrane transporter act    | 52    | 4.65% | 0.446023 |
| transport                                   | 57    | 5.10% | 0.500143 |
| GO:0022890~inorganic cation transmembran    | 10    | 0.89% | 0.64058  |
| GO:0015075~ion transmembrane transporter    | 37    | 3.31% | 0.666394 |
| GO:0006811~ion transport                    | 40    | 3.58% | 0.704556 |
| GO:0006813~potassium ion transport          | 8     | 0.72% | 0.743226 |
| potassium                                   | 6     | 0.54% | 0.751663 |
| GO:0030955~potassium ion binding            | 5     | 0.45% | 0.779334 |
| GO:0008324~cation transmembrane transpor    | 26    | 2.33% | 0.820017 |
| potassium transport                         | 5     | 0.45% | 0.823461 |
| ion transport                               | 22    | 1.97% | 0.854332 |
| GO:0022803~passive transmembrane transp     | 17    | 1.52% | 0.855213 |
| GO:0015267~channel activity                 | 17    | 1.52% | 0.855213 |
| Ionic channel                               | 13    | 1.16% | 0.888466 |
| voltage-gated channel                       | 6     | 0.54% | 0.896856 |
| GO:0015672~monovalent inorganic cation tra  | 14    | 1.25% | 0.89821  |
| GO:0006812~cation transport                 | 23    | 2.06% | 0.925976 |
| GO:0030001~metal ion transport              | 18    | 1.61% | 0.928702 |
| GO:0022836~gated channel activity           | 11    | 0.98% | 0.933086 |
| GO:0005216~ion channel activity             | 14    | 1.25% | 0.940465 |
| GO:0031420~alkali metal ion binding         | 6     | 0.54% | 0.950483 |
| GO:0046873~metal ion transmembrane trans    | 12    | 1.07% | 0.950868 |
| GO:0022838~substrate specific channel activ | 14    | 1.25% | 0.954803 |
| GO:0022832~voltage-gated channel activity   | 6     | 0.54% | 0.957042 |
| GO:0005244~voltage-gated ion channel activ  | 6     | 0.54% | 0.957042 |
| GO:0005267~potassium channel activity       | 4     | 0.36% | 0.973171 |
| GO:0005261~cation channel activity          | 8     | 0.72% | 0.988112 |
| GO:0022843~voltage-gated cation channel ac  | 3     | 0.27% | 0.996715 |

Median: 0.6691685395032168

Geo: 0.7168766539023791

| Term                                       | Count | %     | PValue   |
|--------------------------------------------|-------|-------|----------|
| GO:0007179~transforming growth factor beta | 4     | 0.36% | 0.616436 |
| GO:0007178~transmembrane receptor protei   | 5     | 0.45% | 0.669169 |
| GO:0007167~enzyme linked receptor protein  | 12    | 1.07% | 0.89312  |

Median: 0.6660073746312482

Geo: 0.7181513531178823

| Term                           | Count | %     | PValue   |
|--------------------------------|-------|-------|----------|
| GO:0004601~peroxidase activity | 3     | 0.27% | 0.666007 |

|                                               |   |       |          |
|-----------------------------------------------|---|-------|----------|
| GO:0016684~oxidoreductase activity, acting on | 3 | 0.27% | 0.666007 |
| GO:0016209~antioxidant activity               | 3 | 0.27% | 0.835007 |

Median: 0.7350892210174229

Geo: 0.7192759782543552

| Term                                   | Count | %     | PValue   |
|----------------------------------------|-------|-------|----------|
| GO:0042692~muscle cell differentiation | 4     | 0.36% | 0.591074 |
| GO:0014706~striated muscle development | 6     | 0.54% | 0.648871 |
| GO:0007517~muscle development          | 8     | 0.72% | 0.821308 |
| GO:0007519~skeletal muscle development | 4     | 0.36% | 0.849722 |

Median: 0.9984766275751946

Geo: 0.7250339984678495

| Term                              | Count | %     | PValue   |
|-----------------------------------|-------|-------|----------|
| GO:0048029~monosaccharide binding | 3     | 0.27% | 0.382226 |
| GO:0030246~carbohydrate binding   | 8     | 0.72% | 0.998477 |
| GO:0005529~sugar binding          | 5     | 0.45% | 0.998658 |

Median: 0.7884358417100072

Geo: 0.7321529665083604

| Term                                      | Count | %     | PValue   |
|-------------------------------------------|-------|-------|----------|
| GO:0006730~one-carbon compound metabolism | 6     | 0.54% | 0.571327 |
| GO:0043414~biopolymer methylation         | 3     | 0.27% | 0.788436 |
| GO:0032259~methylation                    | 3     | 0.27% | 0.871273 |

Median: 0.6691685395032168

Geo: 0.7523899992015123

| Term                                    | Count | %     | PValue   |
|-----------------------------------------|-------|-------|----------|
| GO:0051789~response to protein stimulus | 5     | 0.45% | 0.669169 |
| GO:0006986~response to unfolded protein | 5     | 0.45% | 0.669169 |
| GO:0009607~response to biotic stimulus  | 8     | 0.72% | 0.95117  |

Median: 0.7994349606199997

Geo: 0.7551374387493411

| Term                          | Count | %     | PValue   |
|-------------------------------|-------|-------|----------|
| Mitochondrion                 | 23    | 2.06% | 0.658318 |
| transit peptide               | 12    | 1.07% | 0.799435 |
| transit peptide:Mitochondrion | 9     | 0.81% | 0.8182   |

Median: 0.8350065324763454

Geo: 0.7573085527457687

| Term                                          | Count | %     | PValue   |
|-----------------------------------------------|-------|-------|----------|
| GO:0030594~neurotransmitter receptor activity | 7     | 0.63% | 0.565097 |
| GO:0042165~neurotransmitter binding           | 7     | 0.63% | 0.642168 |
| GO:0004983~neuropeptide Y receptor activity   | 3     | 0.27% | 0.652657 |
| GO:0008188~neuropeptide receptor activity     | 3     | 0.27% | 0.835007 |
| GO:0042923~neuropeptide binding               | 3     | 0.27% | 0.835007 |
| GO:0042277~peptide binding                    | 9     | 0.81% | 0.886941 |
| GO:0001653~peptide receptor activity          | 4     | 0.36% | 0.975391 |

Median: 0.7481884961189249

Geo: 0.7666946662279888

| Term                                      | Count | %     | PValue   |
|-------------------------------------------|-------|-------|----------|
| GO:0002009~morphogenesis of an epithelium | 6     | 0.54% | 0.675549 |
| GO:0016331~morphogenesis of embryonic ep  | 3     | 0.27% | 0.748188 |

GO:0048598~embryonic morphogenesis 6 0.54% 0.89166

Median: 0.8437420023447036

Geo: 0.7823281244291606

| Term                                      | Count | %     | PValue   |
|-------------------------------------------|-------|-------|----------|
| GO:0016064~immunoglobulin mediated immu   | 4     | 0.36% | 0.523135 |
| GO:0019724~B cell mediated immunity       | 4     | 0.36% | 0.55106  |
| GO:0002449~lymphocyte mediated immunity   | 4     | 0.36% | 0.663889 |
| GO:0002460~adaptive immune response bas   | 4     | 0.36% | 0.706929 |
| GO:0002250~adaptive immune response       | 4     | 0.36% | 0.706929 |
| GO:0002443~leukocyte mediated immunity    | 4     | 0.36% | 0.754627 |
| GO:0006959~humoral immune response        | 4     | 0.36% | 0.843742 |
| GO:0050776~regulation of immune response  | 5     | 0.45% | 0.847884 |
| GO:0002682~regulation of immune system pi | 5     | 0.45% | 0.872566 |
| immune response                           | 3     | 0.27% | 0.955648 |
| GO:0002252~immune effector process        | 4     | 0.36% | 0.971089 |
| GO:0002526~acute inflammatory response    | 3     | 0.27% | 0.98349  |
| GO:0006955~immune response                | 12    | 1.07% | 0.999982 |

Median: 0.8311187328631705

Geo: 0.7899641669263333

| Term                             | Count | %     | PValue   |
|----------------------------------|-------|-------|----------|
| GO:0031965~nuclear membrane      | 5     | 0.45% | 0.656212 |
| GO:0044453~nuclear membrane part | 4     | 0.36% | 0.771129 |
| GO:0005635~nuclear envelope      | 6     | 0.54% | 0.831119 |
| GO:0005643~nuclear pore          | 3     | 0.27% | 0.833261 |
| GO:0046930~pore complex          | 3     | 0.27% | 0.877853 |

Median: 0.8000862740701508

Geo: 0.7916258582136574

| Term                                     | Count | %     | PValue   |
|------------------------------------------|-------|-------|----------|
| GO:0042107~cytokine metabolic process    | 4     | 0.36% | 0.706929 |
| GO:0001816~cytokine production           | 5     | 0.45% | 0.800086 |
| GO:0042089~cytokine biosynthetic process | 3     | 0.27% | 0.877096 |

Median: 0.758827055718108

Geo: 0.7991755408655077

| Term                                        | Count | %     | PValue   |
|---------------------------------------------|-------|-------|----------|
| GO:0006497~protein amino acid lipidation    | 3     | 0.27% | 0.7257   |
| GO:0042158~lipoprotein biosynthetic process | 3     | 0.27% | 0.758827 |
| GO:0042157~lipoprotein metabolic process    | 3     | 0.27% | 0.926887 |

Median: 0.8160828494606095

Geo: 0.8081255298438712

| Term                           | Count | %     | PValue   |
|--------------------------------|-------|-------|----------|
| GO:0016337~cell-cell adhesion  | 13    | 1.16% | 0.792443 |
| GO:0022610~biological adhesion | 30    | 2.68% | 0.816083 |
| GO:0007155~cell adhesion       | 30    | 2.68% | 0.816083 |

Median: 0.9232974364126381

Geo: 0.8238423678796846

| Term                                   | Count | %     | PValue   |
|----------------------------------------|-------|-------|----------|
| GO:0016126~sterol biosynthetic process | 3     | 0.27% | 0.536282 |
| GO:0016125~sterol metabolic process    | 4     | 0.36% | 0.831163 |

|                                          |   |       |          |
|------------------------------------------|---|-------|----------|
| GO:0008203~cholesterol metabolic process | 3 | 0.27% | 0.923297 |
| GO:0006694~steroid biosynthetic process  | 3 | 0.27% | 0.936727 |
| GO:0008202~steroid metabolic process     | 5 | 0.45% | 0.984434 |

Median: 0.9362941363435059

Geo: 0.8360218956586637

| Term                                         | Count | %     | PValue   |
|----------------------------------------------|-------|-------|----------|
| GO:0005843~cytosolic small ribosomal subun   | 3     | 0.27% | 0.408313 |
| GO:0015935~small ribosomal subunit           | 3     | 0.27% | 0.733306 |
| ribonucleoprotein                            | 8     | 0.72% | 0.797397 |
| GO:0005830~cytosolic ribosome (sensu Euka    | 3     | 0.27% | 0.818051 |
| rno03010:Ribosome                            | 4     | 0.36% | 0.848076 |
| GO:0033279~ribosomal subunit                 | 4     | 0.36% | 0.936294 |
| ribosomal protein                            | 5     | 0.45% | 0.941543 |
| ribosome                                     | 3     | 0.27% | 0.958014 |
| GO:0030529~ribonucleoprotein complex         | 17    | 1.52% | 0.996945 |
| GO:0003735~structural constituent of ribosor | 7     | 0.63% | 0.999988 |
| GO:0005840~ribosome                          | 7     | 0.63% | 0.999957 |

Median: 0.8700920567964969

Geo: 0.8419358538470354

| Term                                      | Count | %     | PValue   |
|-------------------------------------------|-------|-------|----------|
| GO:0003777~microtubule motor activity     | 4     | 0.36% | 0.728459 |
| GO:0007018~microtubule-based movement     | 5     | 0.45% | 0.847884 |
| GO:0005875~microtubule associated comple; | 5     | 0.45% | 0.8923   |
| GO:0030705~cytoskeleton-dependent intrace | 5     | 0.45% | 0.911724 |

Median: 0.8453599387629621

Geo: 0.8498359253984246

| Term                                     | Count | %     | PValue   |
|------------------------------------------|-------|-------|----------|
| GO:0007126~meiosis                       | 3     | 0.27% | 0.84536  |
| GO:0051327~M phase of meiotic cell cycle | 3     | 0.27% | 0.84536  |
| GO:0051321~meiotic cell cycle            | 3     | 0.27% | 0.858859 |

Median: 0.8437813998480348

Geo: 0.861373682922828

| Term                                 | Count | %     | PValue   |
|--------------------------------------|-------|-------|----------|
| GO:0005615~extracellular space       | 88    | 7.87% | 0.774662 |
| GO:0044421~extracellular region part | 91    | 8.14% | 0.843781 |
| GO:0005576~extracellular region      | 94    | 8.41% | 0.97776  |

Median: 0.8877030784420337

Geo: 0.866705571947067

| Term                                     | Count | %     | PValue   |
|------------------------------------------|-------|-------|----------|
| GO:0015179~L-amino acid transmembrane tr | 3     | 0.27% | 0.666007 |
| GO:0006865~amino acid transport          | 4     | 0.36% | 0.837557 |
| GO:0015171~amino acid transmembrane trar | 3     | 0.27% | 0.848745 |
| GO:0046942~carboxylic acid transport     | 5     | 0.45% | 0.885656 |
| GO:0015849~organic acid transport        | 5     | 0.45% | 0.889751 |
| GO:0015837~amine transport               | 4     | 0.36% | 0.924703 |
| GO:0046943~carboxylic acid transmembrane | 3     | 0.27% | 0.95976  |
| GO:0005342~organic acid transmembrane tr | 3     | 0.27% | 0.961621 |

| Median: 0.9354118585438735                    | Geo: 0.8733251539872539 |       |          |
|-----------------------------------------------|-------------------------|-------|----------|
| Term                                          | Count                   | %     | PValue   |
| IPR000047:Helix-turn-helix motif, lambda-like | 3                       | 0.27% | 0.633491 |
| IPR001356:Homeobox                            | 5                       | 0.45% | 0.921786 |
| SM00389:HOX                                   | 5                       | 0.45% | 0.935412 |
| IPR012287:Homeodomain-related                 | 4                       | 0.36% | 0.95928  |
| Homeobox                                      | 4                       | 0.36% | 0.969529 |

| Median: 0.9013406927694274                  | Geo: 0.8824357299623315 |       |          |
|---------------------------------------------|-------------------------|-------|----------|
| Term                                        | Count                   | %     | PValue   |
| GO:0045792~negative regulation of cell size | 3                       | 0.27% | 0.748188 |
| GO:0016049~cell growth                      | 7                       | 0.63% | 0.869474 |
| GO:0008361~regulation of cell size          | 7                       | 0.63% | 0.891665 |
| GO:0040007~growth                           | 13                      | 1.16% | 0.911017 |
| GO:0040008~regulation of growth             | 7                       | 0.63% | 0.924063 |
| GO:0001558~regulation of cell growth        | 4                       | 0.36% | 0.966943 |

| Median: 0.8924802767520075                     | Geo: 0.8834873488794694 |       |          |
|------------------------------------------------|-------------------------|-------|----------|
| Term                                           | Count                   | %     | PValue   |
| GO:0006816~calcium ion transport               | 6                       | 0.54% | 0.823628 |
| calcium transport                              | 3                       | 0.27% | 0.889928 |
| GO:0015674~di-, tri-valent inorganic cation tr | 7                       | 0.63% | 0.895033 |
| GO:0030001~metal ion transport                 | 18                      | 1.61% | 0.928702 |

| Median: 0.981699345405155                | Geo: 0.8890739249359461 |       |          |
|------------------------------------------|-------------------------|-------|----------|
| Term                                     | Count                   | %     | PValue   |
| GO:0009897~external side of plasma membr | 6                       | 0.54% | 0.404713 |
| IPR003598:Immunoglobulin subtype 2       | 4                       | 0.36% | 0.945364 |
| SM00408:IGc2                             | 4                       | 0.36% | 0.963565 |
| IPR013151:Immunoglobulin                 | 4                       | 0.36% | 0.971303 |
| SM00409:IG                               | 7                       | 0.63% | 0.981699 |
| IPR003599:Immunoglobulin subtype         | 5                       | 0.45% | 0.99162  |
| immunoglobulin domain                    | 6                       | 0.54% | 0.996245 |
| IPR007110:Immunoglobulin-like            | 8                       | 0.72% | 0.999529 |
| IPR013783:Immunoglobulin-like fold       | 7                       | 0.63% | 0.999939 |

| Median: 0.8515833251974014        | Geo: 0.8906688475145337 |       |          |
|-----------------------------------|-------------------------|-------|----------|
| Term                              | Count                   | %     | PValue   |
| GO:0046906~tetrapyrrole binding   | 8                       | 0.72% | 0.851583 |
| GO:0020037~heme binding           | 8                       | 0.72% | 0.851583 |
| GO:0004497~monooxygenase activity | 4                       | 0.36% | 0.974304 |

| Median: 0.9962434132282394     | Geo: 0.8976463845659044 |        |          |
|--------------------------------|-------------------------|--------|----------|
| Term                           | Count                   | %      | PValue   |
| membrane                       | 163                     | 14.58% | 0.3784   |
| topological domain:Cytoplasmic | 69                      | 6.17%  | 0.764369 |
| transmembrane region           | 83                      | 7.42%  | 0.872932 |
| transmembrane                  | 117                     | 10.47% | 0.910233 |



|                                                                   |     |        |          |
|-------------------------------------------------------------------|-----|--------|----------|
| GO:0044425~membrane part                                          | 261 | 23.35% | 0.977345 |
| GO:0016020~membrane topological domain:Extracellular glycoprotein | 313 | 28.00% | 0.991044 |
| glycosylation site:N-linked (GlcNAc...)                           | 43  | 3.85%  | 0.99537  |
| signal                                                            | 85  | 7.60%  | 0.997117 |
| GO:0031224~intrinsic to membrane                                  | 68  | 6.08%  | 0.998767 |
| GO:0016021~integral to membrane                                   | 60  | 5.37%  | 0.999805 |
| disulfide bond                                                    | 216 | 19.32% | 0.999831 |
| signal peptide                                                    | 214 | 19.14% | 0.999877 |
|                                                                   | 43  | 3.85%  | 0.999931 |
|                                                                   | 51  | 4.56%  | 0.999983 |

Median: 0.9770492762883788

Geo: 0.898924811484142

| Term                                        | Count | %     | PValue   |
|---------------------------------------------|-------|-------|----------|
| Serine protease inhibitor                   | 3     | 0.27% | 0.659227 |
| protease inhibitor                          | 3     | 0.27% | 0.850183 |
| GO:0004867~serine-type endopeptidase inhib  | 3     | 0.27% | 0.963399 |
| GO:0004866~endopeptidase inhibitor activity | 4     | 0.36% | 0.9907   |
| GO:0030414~protease inhibitor activity      | 4     | 0.36% | 0.991503 |
| GO:0004857~enzyme inhibitor activity        | 7     | 0.63% | 0.994834 |

Median: 0.9024340852042524

Geo: 0.8997282058107576

| Term                            | Count | %     | PValue   |
|---------------------------------|-------|-------|----------|
| GO:0042060~wound healing        | 8     | 0.72% | 0.839849 |
| GO:0042246~tissue regeneration  | 3     | 0.27% | 0.871273 |
| GO:0031099~regeneration         | 3     | 0.27% | 0.933595 |
| GO:0048589~developmental growth | 3     | 0.27% | 0.959249 |

Median: 0.9522219354712798

Geo: 0.9072825421771014

| Term                                         | Count | %     | PValue   |
|----------------------------------------------|-------|-------|----------|
| GO:0005201~extracellular matrix structural c | 4     | 0.36% | 0.771531 |
| GO:0044420~extracellular matrix part         | 4     | 0.36% | 0.89221  |
| GO:0005578~proteinaceous extracellular mat   | 9     | 0.81% | 0.952222 |
| GO:0031012~extracellular matrix              | 9     | 0.81% | 0.963879 |
| extracellular matrix                         | 3     | 0.27% | 0.973042 |

Median: 0.9356066609929128

Geo: 0.9188051673289847

| Term                                         | Count | %     | PValue   |
|----------------------------------------------|-------|-------|----------|
| GO:0050776~regulation of immune response     | 5     | 0.45% | 0.847884 |
| GO:0002682~regulation of immune system pi    | 5     | 0.45% | 0.872566 |
| GO:0002253~activation of immune response     | 3     | 0.27% | 0.926887 |
| GO:0051240~positive regulation of multicellu | 5     | 0.45% | 0.944326 |
| GO:0050778~positive regulation of immune r   | 3     | 0.27% | 0.961214 |
| GO:0002684~positive regulation of immune s   | 3     | 0.27% | 0.966578 |

Median: 0.9414350302664871

Geo: 0.9229533304598382

| Term                                 | Count | %     | PValue   |
|--------------------------------------|-------|-------|----------|
| GO:0008201~heparin binding           | 3     | 0.27% | 0.795615 |
| GO:0005539~glycosaminoglycan binding | 3     | 0.27% | 0.929526 |

|                                   |   |       |          |
|-----------------------------------|---|-------|----------|
| GO:0030247~polysaccharide binding | 3 | 0.27% | 0.941435 |
| GO:0001871~pattern binding        | 3 | 0.27% | 0.963399 |
| GO:0030246~carbohydrate binding   | 8 | 0.72% | 0.998477 |

Median: 0.9456647511946196

Term

|                                   |    |       |          |
|-----------------------------------|----|-------|----------|
| GO:0006508~proteolysis            | 36 | 3.22% | 0.876179 |
| GO:0008233~peptidase activity     | 28 | 2.50% | 0.945665 |
| GO:0004175~endopeptidase activity | 16 | 1.43% | 0.98724  |

Geo: 0.9352281958909899

Count % PValue

Median: 0.9504320986748979

Term

|                   |   |       |          |
|-------------------|---|-------|----------|
| ank repeat        | 4 | 0.36% | 0.916184 |
| IPR002110:Ankyrin | 4 | 0.36% | 0.950432 |
| SM00248:ANK       | 4 | 0.36% | 0.957554 |

Geo: 0.9412154711720149

Count % PValue

Median: 0.9658152263361006

Term

|                                   |   |       |          |
|-----------------------------------|---|-------|----------|
| growth factor                     | 4 | 0.36% | 0.962854 |
| GO:0005125~cytokine activity      | 8 | 0.72% | 0.965815 |
| GO:0008083~growth factor activity | 4 | 0.36% | 0.9907   |

Geo: 0.9730433063544447

Count % PValue
